# Supplementary material for: Catalyst- and solvent-free aminolysis of the asymmetric derivatives of Evans’ chiral N-acyloxazolidinones: enantioselective synthesis of chiral amides and its applications
Source: Royal Society of Chemistry journal article supplement (doi:10.1039/d2gc00662f), 2022-01-01
Supplement: d2gc00662f1.pdf [file d2gc00662f1.pdf]

Electronic Supplementary Information

## Catalyst- and Solvent-Free Aminolysis of the Asymmetric Derivatives of Evans' Chiral *N*-Acyloxazolidinones: Enantioselective Synthesis of Chiral Amides and Its Applications

Hui-Rong Lu,<sup>†</sup> Hui Geng,<sup>†</sup> Guan-Tian Ding,<sup>†</sup> and Pei-Qiang Huang\*

Department of Chemistry, Fujian Provincial Key Laboratory of Chemical Biology, College  
of Chemistry and Chemical Engineering, Xiamen University, Xiamen, Fujian 361005,  
P. R. China.

E-mail: [pqhuang@xmu.edu.cn](mailto:pqhuang@xmu.edu.cn)

### Table of Contents

|                                                                                  |     |
|----------------------------------------------------------------------------------|-----|
| I. General Information.....                                                      | 2   |
| II. Synthesis of the Chiral <i>N</i> -Acyloxazolidinone Derivatives .....        | 2   |
| III. Aminolysis of the Chiral <i>N</i> -Acyloxazolidinone Derivatives .....      | 8   |
| IV. Transformations of the Chiral Amides .....                                   | 24  |
| V. References .....                                                              | 28  |
| VI. <sup>1</sup> H and <sup>13</sup> C NMR Spectra.....                          | 29  |
| VII. Determination of Enantiomeric Excesses of the Products by Chiral HPLC ..... | 79  |
| VIII. X-Ray Crystal Data of Compound <b>3c</b> .....                             | 107 |

<sup>†</sup> These authors contributed equally to this work.

## I. General Information

Unless otherwise noted, reactions were carried out in anhydrous and argon atmosphere. All glassware was dried in infrared rapid drying box before use. Unless otherwise specified, all reagents used in the experiment were purchased from the reagent supply platform (Adamas-beta®, Alfa Aesar, Sigma-Aldrich) and used directly without special treatment. All solvents were redistilled before use.

NMR spectra were measured by Bruker 400 MHz or Bruker 500 MHz spectrometer. Chemical shifts ( $\delta$ ) referenced to internal standard Me<sub>4</sub>Si and solvent signals (Me<sub>4</sub>Si, 0 ppm for <sup>1</sup>H NMR and CDCl<sub>3</sub>, 77.0 ppm for <sup>13</sup>C NMR). HPLC analyses were carried out on an Agilent 1260 series system with Daicel Chiralpak® or Daicel Chiralcel® columns (4.6 × 250 mm, particle size 3  $\mu$ m). Infrared spectra were measured with a Nicolet Avatar 360 FT-IR spectrometer using film KBr pellet techniques. Melting points were uncorrected. High resolution mass spectra (ESI) were measured by a Micromass QTOF2 Quadruple/Time-of-Flight Tandem mass spectrometer. Optical rotation data were obtained with an Anton Paar MCP 500 polarimeter at 589 nm. Silica gel (200–300 mesh) was used for flash column chromatography.

## II. Synthesis of the Chiral *N*-Acyloxazolidinone Derivatives

A series of chiral *N*-acyloxazolidinones were prepared by asymmetric alkylation,<sup>1</sup> asymmetric Aldol reaction,<sup>2,3</sup> or asymmetric conjugate addition reaction<sup>4</sup> induced by Evans chiral auxiliaries, the experimental procedures were referred to the relevant literature.<sup>1-4</sup>

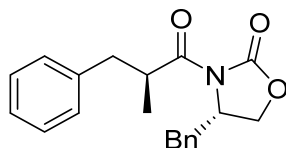

### (*S*)-4-Benzyl-3-((*S*)-2-methyl-3-phenylpropanoyl)oxazolidin-2-one (2a).

White solid (612 mg, 3.0 mmol, yield: 63%). Mp: 86-87.5 °C. <sup>1</sup>H NMR (400 MHz, CDCl<sub>3</sub>)  $\delta$  7.37 – 7.24 (m, 5H), 7.26 – 7.14 (m, 5H), 4.57 – 4.46 (m, 1H), 4.17 – 4.09 (m, 1H), 4.09 – 4.03 (m, 1H), 3.95 (t, *J* = 8.4 Hz, 1H), 3.24 (dd, *J* = 13.4, 3.4 Hz, 1H), 3.03 (dd, *J* = 13.4, 7.7

Hz, 1H), 2.79 – 2.64 (m, 2H), 1.25 (d,  $J = 6.8$  Hz, 3H).  $^{13}\text{C}$  NMR (101 MHz,  $\text{CDCl}_3$ )  $\delta$  176.5, 153.0, 139.1, 135.1, 129.3, 129.3, 128.9, 128.3, 127.2, 126.4, 65.8, 55.0, 39.9, 39.5, 37.7, 16.7.

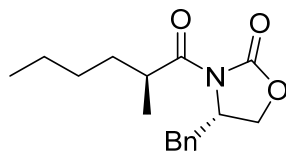

**(S)-4-Benzyl-3-((S)-2-methylhexanoyl)oxazolidin-2-one (2b)**

Colorless oil (816 mg, 3.6 mmol, yield: 78%).  $[\alpha]_{\text{D}}^{25} +75.3$  ( $c$  1.0,  $\text{CHCl}_3$ ).  $^1\text{H}$  NMR (500 MHz,  $\text{CDCl}_3$ )  $\delta$  7.38 – 7.29 (m, 2H), 7.31 – 7.25 (m, 1H), 7.28 – 7.19 (m, 2H), 4.68 (ddt,  $J = 9.7, 7.5, 3.3$  Hz, 1H), 4.24 – 4.12 (m, 2H), 3.71 (h,  $J = 6.9$  Hz, 1H), 3.27 (dd,  $J = 13.4, 3.3$  Hz, 1H), 2.77 (dd,  $J = 13.4, 9.7$  Hz, 1H), 1.80 – 1.70 (m, 1H), 1.48 – 1.37 (m, 1H), 1.38 – 1.26 (m, 4H), 1.22 (d,  $J = 6.8$  Hz, 3H), 0.89 (t,  $J = 6.9$  Hz, 3H).  $^{13}\text{C}$  NMR (126 MHz,  $\text{CDCl}_3$ )  $\delta$  177.3, 153.0, 135.3, 129.4, 128.9, 127.3, 66.0, 55.3, 37.9, 37.6, 33.1, 29.4, 22.7, 17.3, 14.0.

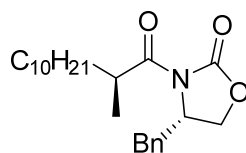

**(S)-4-Benzyl-3-((S)-2-methyldodecanoyl)oxazolidin-2-one (2c)**

Colorless oil (783 mg, 3.0 mmol, yield: 70%).  $^1\text{H}$  NMR (500 MHz,  $\text{CDCl}_3$ )  $\delta$  7.37 – 7.30 (m, 2H), 7.30 – 7.27 (m, 1H), 7.22 (dd,  $J = 6.9, 1.7$  Hz, 2H), 4.72 – 4.63 (m, 1H), 4.23 – 4.13 (m, 2H), 3.70 (h,  $J = 6.9$  Hz, 1H), 3.27 (dd,  $J = 13.4, 3.3$  Hz, 1H), 2.77 (dd,  $J = 13.4, 9.6$  Hz, 1H), 1.78 – 1.68 (m, 1H), 1.65 – 1.55 (m, 1H), 1.46 – 1.34 (m, 1H), 1.25 (s, 15H), 1.22 (d,  $J = 6.9$  Hz, 3H), 0.88 (t,  $J = 6.8$  Hz, 3H).  $^{13}\text{C}$  NMR (126 MHz,  $\text{CDCl}_3$ )  $\delta$  177.4, 153.0, 135.3, 129.4, 128.9, 127.3, 66.0, 55.4, 37.9, 37.7, 33.4, 31.9, 29.7, 29.6, 29.5, 29.3, 27.3, 22.7, 17.4, 14.1.

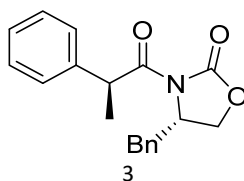

**(S)-4-Benzyl-3-((S)-2-phenylpropanoyl)oxazolidin-2-one (2d)**

White solid (807 mg, 3.4 mmol, yield: 77%). Mp: 76.5-78 °C. <sup>1</sup>H NMR (400 MHz, CDCl<sub>3</sub>) δ 7.47 – 7.33 (m, 2H), 7.33 – 7.27 (m, 4H), 7.27 – 7.18 (m, 4H), 5.12 (q, *J* = 7.0 Hz, 1H), 4.63 – 4.49 (m, 1H), 4.08 (dd, *J* = 9.0, 2.4 Hz, 1H), 4.01 (t, *J* = 8.3 Hz, 1H), 3.33 (dd, *J* = 13.3, 3.4 Hz, 1H), 2.79 (dd, *J* = 13.3, 9.7 Hz, 1H), 1.54 (d, *J* = 7.0 Hz, 3H). <sup>13</sup>C NMR (101 MHz, CDCl<sub>3</sub>) δ 174.5, 152.8, 140.2, 135.3, 129.4, 128.9, 128.6, 128.1, 127.3, 127.2, 65.8, 55.7, 43.1, 37.9, 19.4.

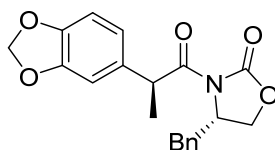

**(S)-3-((S)-2-(Benzo[d][1,3]dioxol-5-yl)propanoyl)-4-benzylloxazolidin-2-one (2f)**

Yellow oil, yield: 65%. [ $\alpha$ ]<sub>D</sub><sup>25</sup> +105.5 (*c* 1.0, CHCl<sub>3</sub>). <sup>1</sup>H NMR (500 MHz, CDCl<sub>3</sub>) δ 7.33 (t, *J* = 7.4 Hz, 2H), 7.30 – 7.24 (m, 1H), 7.24 – 7.18 (m, 2H), 6.88 (d, *J* = 1.8 Hz, 1H), 6.82 (dd, *J* = 8.0, 1.8 Hz, 1H), 6.73 (d, *J* = 8.0 Hz, 1H), 5.92 (s, 2H), 5.04 (q, *J* = 7.1 Hz, 1H), 4.62 – 4.55 (m, 1H), 4.14 – 4.09 (m, 1H), 4.09 – 4.03 (m, 1H), 3.33 (dd, *J* = 13.4, 3.2 Hz, 1H), 2.79 (dd, *J* = 13.4, 9.7 Hz, 1H), 1.50 (d, *J* = 7.1 Hz, 3H). <sup>13</sup>C NMR (126 MHz, CDCl<sub>3</sub>) δ 174.6, 152.9, 147.7, 146.7, 135.3, 134.0, 129.4, 128.9, 127.3, 121.4, 108.5, 108.3, 101.0, 65.9, 55.8, 42.6, 37.9, 19.5. HRMS calcd for [C<sub>20</sub>H<sub>19</sub>NO<sub>5</sub>Na]<sup>+</sup> (M+Na<sup>+</sup>): 376.1155, found: 376.1162.

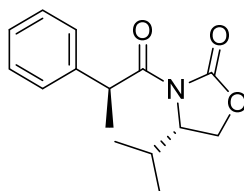

**(S)-4-Isopropyl-3-((S)-2-phenylpropanoyl)oxazolidin-2-one (2g)**

Colorless oil. (585 mg, 4.4 mmol, yield: 53%). <sup>1</sup>H NMR (500 MHz, CDCl<sub>3</sub>) δ 7.39 – 7.31 (m, 2H), 7.31 – 7.24 (m, 2H), 7.24 – 7.18 (m, 1H), 5.14 (q, *J* = 7.0 Hz, 1H), 4.37 – 4.30 (m, 1H), 4.11 (dd, *J* = 9.2, 2.5 Hz, 1H), 4.05 (t, *J* = 8.7 Hz, 1H), 2.48 – 2.34 (m, 1H), 1.50 (d, *J* = 7.0, 3H), 0.92 (d, *J* = 4.6 Hz, 3H), 0.90 (d, *J* = 4.6 Hz, 3H). <sup>13</sup>C NMR (126 MHz, CDCl<sub>3</sub>) δ 174.4, 153.4, 140.2, 128.4, 128.0, 127.0, 62.9, 58.8, 42.9, 28.4, 19.5, 17.8, 14.5.

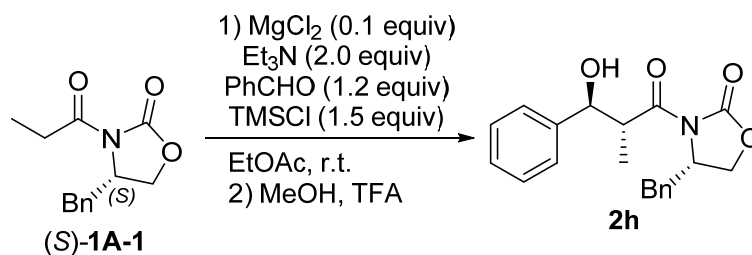

**(S)-4-Benzyl-3-((2R,3S)-3-hydroxy-2-methyl-3-phenylpropanoyl)oxazolidin-2-one (2h)**

White solid (523 mg, 2.0 mmol, yield: 77%).  $^1\text{H}$  NMR (400 MHz,  $\text{CDCl}_3$ )  $\delta$  7.47 – 7.37 (m, 2H), 7.37 – 7.31 (m, 2H), 7.31 – 7.21 (m, 4H), 7.19 – 7.09 (m, 2H), 4.80 (d,  $J$  = 8.1 Hz, 1H), 4.72 – 4.58 (m, 1H), 4.40 – 4.26 (m, 1H), 4.20 – 4.03 (m, 2H), 3.17 (dd,  $J$  = 13.6, 3.4 Hz, 1H), 3.13 (brs, 1H), 2.64 (dd,  $J$  = 13.6, 9.3 Hz, 1H), 1.07 (d,  $J$  = 6.9 Hz, 3H).  $^{13}\text{C}$  NMR (101 MHz,  $\text{CDCl}_3$ )  $\delta$  176.5, 153.4, 142.0, 135.1, 129.3, 128.8, 128.4, 127.8, 127.1, 126.5, 77.2, 65.8, 55.2, 44.2, 37.4, 14.7.

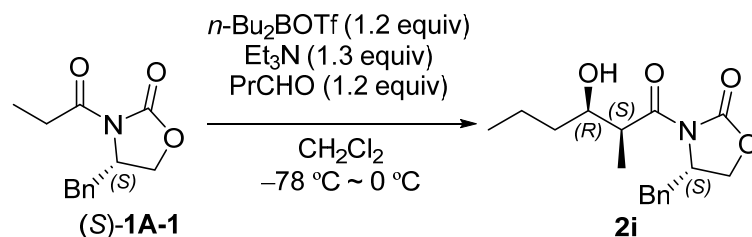

**(S)-4-Benzyl-3-((2S,3R)-3-hydroxy-2-methylhexanoyl)oxazolidin-2-one (2i)**

White solid.  $^1\text{H}$  NMR (500 MHz,  $\text{CDCl}_3$ )  $\delta$  7.38 – 7.30 (m, 2H), 7.30 – 7.25 (m, 1H), 7.24 – 7.16 (m, 2H), 4.79 – 4.61 (m, 1H), 4.23 (dd,  $J$  = 9.1, 7.7 Hz, 1H), 4.18 (dd,  $J$  = 9.1, 2.9 Hz, 1H), 3.97 (ddd,  $J$  = 8.6, 4.3, 2.9 Hz, 1H), 3.77 (qd,  $J$  = 7.1, 2.9 Hz, 1H), 3.24 (dd,  $J$  = 13.5, 3.4 Hz, 1H), 3.02 (brs, 1H), 2.79 (dd,  $J$  = 13.5, 9.4 Hz, 1H), 1.61 – 1.45 (m, 2H), 1.44 – 1.31 (m, 2H), 1.25 (d,  $J$  = 7.1 Hz, 3H), 0.94 (t,  $J$  = 7.1 Hz, 3H).  $^{13}\text{C}$  NMR (126 MHz,  $\text{CDCl}_3$ )  $\delta$  177.4, 153.0, 135.0, 129.3, 128.9, 127.3, 71.2, 66.1, 55.0, 42.1, 37.7, 35.9, 19.1, 13.9, 10.3.

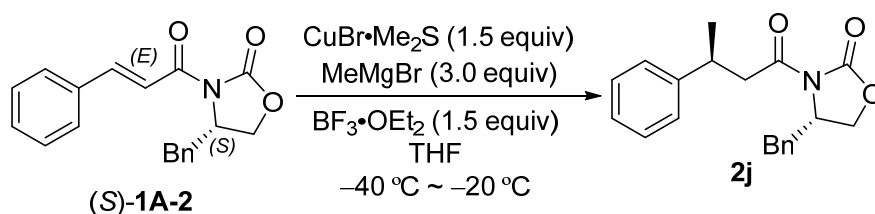

**(S)-4-Benzyl-3-((S)-3-phenylbutanoyl)oxazolidin-2-one (2j)**

White solid (386 mg, 2.0 mmol, yield: 60%).  $^1\text{H}$  NMR (400 MHz,  $\text{CDCl}_3$ )  $\delta$  7.36 – 7.24 (m, 7H), 7.24 – 7.19 (m, 1H), 7.16 – 7.04 (m, 2H), 4.74 – 4.55 (m, 1H), 4.20 – 4.06 (m, 2H), 3.53 – 3.36 (m, 2H), 3.19 – 2.99 (m, 2H), 2.59 (dd,  $J = 13.5, 9.4$  Hz, 1H), 1.36 (d,  $J = 6.3$  Hz, 3H).  $^{13}\text{C}$  NMR (101 MHz,  $\text{CDCl}_3$ )  $\delta$  171.9, 153.3, 145.6, 135.1, 129.3, 128.9, 128.4, 127.2, 127.0, 126.4, 66.0, 54.9, 43.2, 37.6, 36.0, 22.0.

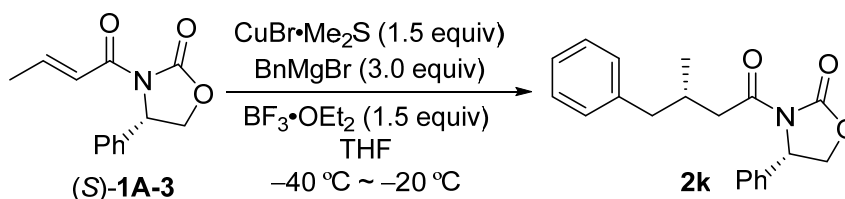

**(S)-3-((S)-3-Methyl-4-phenylbutanoyl)-4-phenyloxazolidin-2-one (2k)**

White solid (339 mg, 1.1 mmol, yield: 97%). Mp: 95-97  $^\circ\text{C}$ .  $[\alpha]_{\text{D}}^{22} +48.5$  ( $c$  1.0,  $\text{CHCl}_3$ ).  $^1\text{H}$  NMR (500 MHz,  $\text{CDCl}_3$ )  $\delta$  7.37 – 7.27 (m, 4H), 7.26 – 7.19 (m, 3H), 7.14 (dd,  $J = 8.4, 6.7$  Hz, 1H), 7.12 – 7.05 (m, 2H), 5.31 (dd,  $J = 8.8, 3.8$  Hz, 1H), 4.56 – 4.47 (m, 1H), 4.15 – 4.12 (m, 1H), 2.94 (ddd,  $J = 16.4, 5.6, 2.9$  Hz, 1H), 2.77 (dd,  $J = 16.4, 8.2$  Hz, 1H), 2.61 (ddd,  $J = 13.4, 6.2, 2.0$  Hz, 1H), 2.43 (dd,  $J = 13.4, 8.0$  Hz, 1H), 2.35 – 2.28 (m, 1H), 0.84 (d,  $J = 6.7$  Hz, 3H).  $^{13}\text{C}$  NMR (126 MHz,  $\text{CDCl}_3$ )  $\delta$  171.8, 153.5, 140.0, 129.0, 128.9, 128.4, 128.2, 128.0, 126.7, 125.7, 69.6, 57.3, 42.7, 41.8, 31.3, 19.1. HRMS calcd for  $[\text{C}_{20}\text{H}_{21}\text{NO}_3\text{Na}]^+$  ( $\text{M}+\text{Na}^+$ ): 346.1414, found: 346.1418.

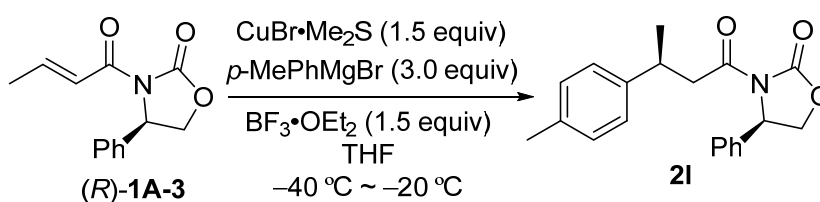

**(R)-4-Phenyl-3-((S)-3-(p-tolyl)butanoyl)oxazolidin-2-one (2l)**

White solid (900 mg, 3.7 mmol, yield: 76%). Mp: 71-72  $^\circ\text{C}$ .  $[\alpha]_{\text{D}}^{22} +17.9$  ( $c$  1.0,  $\text{CHCl}_3$ ).  $^1\text{H}$  NMR (400 MHz,  $\text{CDCl}_3$ )  $\delta$  7.31 – 7.19 (m, 3H), 7.15 – 6.98 (m, 6H), 5.34 (dd,  $J = 8.8, 4.0$  Hz, 1H), 4.54 (t,  $J = 8.8$  Hz, 1H), 4.10 (dd,  $J = 8.8, 4.0$  Hz, 1H), 3.45 (dd,  $J = 15.7, 6.7$  Hz, 1H), 3.32 – 3.25 (m, 1H), 3.00 (dd,  $J = 15.7, 7.9$  Hz, 1H), 2.30 (s, 3H), 1.22 (d,  $J = 6.9$  Hz, 3H).  $^{13}\text{C}$  NMR (101 MHz,  $\text{CDCl}_3$ )  $\delta$  171.3, 153.5, 142.4, 138.7, 135.5, 129.0, 128.8, 128.2, 126.6, 125.5, 69.6, 57.3, 43.0, 35.5, 21.7, 20.8. HRMS calcd for  $[\text{C}_{20}\text{H}_{21}\text{NO}_3\text{Na}]^+$  ( $\text{M}+\text{Na}^+$ ):

346.1414, found: 346.1418.

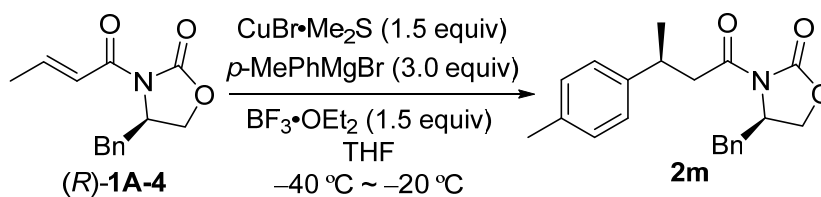

**(R)-4-Bnezy-3-((S)-3-(p-tolyl)butanoyl)oxazolidin-2-one (2m)**

White solid (7.76 g, 23.0 mmol, yield: 81%). Mp: 85-86 °C.  $[\alpha]_{\text{D}}^{20} +26.4$  (c 1.0, CHCl<sub>3</sub>). <sup>1</sup>H NMR (400 MHz, CDCl<sub>3</sub>) δ 7.37 – 7.06 (m, 9H), 4.62 (ddt, *J* = 11.0, 7.5, 3.4 Hz, 1H), 4.18 – 4.05 (m, 2H), 3.49 – 3.33 (m, 2H), 3.13 – 3.00 (m, 2H), 2.60 (dd, *J* = 13.5, 9.3 Hz, 1H), 2.31 (s, 3H), 1.33 (d, *J* = 6.9 Hz, 3H). <sup>13</sup>C NMR (101 MHz, CDCl<sub>3</sub>) δ 171.9, 153.3, 142.6, 135.8, 135.1, 129.3, 129.1, 128.8, 127.2, 126.8, 65.9, 54.9, 43.2, 37.5, 35.5, 22.1, 20.9. HRMS calcd for [C<sub>21</sub>H<sub>23</sub>NO<sub>3</sub>Na]<sup>+</sup> (M+Na<sup>+</sup>): 360.1570, found: 360.1572.

### III. Aminolysis of the Chiral *N*-Acloxazolidinone Derivatives

**General Procedure 1 (GP-1):** A mixture of *N*-Acloxazolidinone (0.5 mmol, 1.0 equiv) and amine (1.5 mmol, 3.0 equiv) was stirred at room temperature under nitrogen atmosphere for 24 h. The resulting mixture was concentrated under reduced pressure. The residue was purified by flash column chromatography on silica gel eluting with petroleum ether/ethyl acetate (4/1, v/v) mixture.

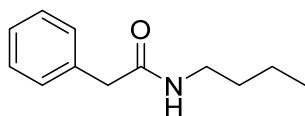

***N*-Butyl-2-phenylacetamide (3A).** Following GP-1, **3A** was synthesized from **1a** and butan-1-amine. White solid. Yield: 98% (96 mg, 0.50 mmol). Spectral data match those previously reported<sup>[5a]</sup>.

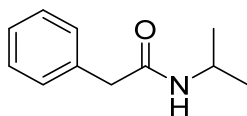

***N*-Isopropyl-2-phenylacetamide (3ac).** Following GP-1, **3ac** was synthesized from **1a** and propan-2-amine. White solid. Yield: 87% (62 mg, 0.4 mmol). Spectral data match those previously reported<sup>[5b]</sup>.

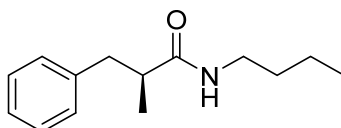

#### **(*S*)-*N*-Butyl-2-methyl-3-phenylpropanamide (3a).**

Following GP-1, **3a** was synthesized from **2a** and butan-1-amine. Colorless oil. Yield: 80% (46 mg, 0.26 mmol).  $[\alpha]_D^{25} +54.9$  (c 0.99, CHCl<sub>3</sub>); IR (film): 3294, 3085, 3064, 3028, 2960, 2930, 2872, 1645, 1557, 1496, 1455, 1260, 1080, 800, 744, 699 cm<sup>-1</sup>. <sup>1</sup>H NMR (500 MHz, CDCl<sub>3</sub>)  $\delta$  7.33 – 7.22 (m, 2H), 7.22 – 7.10 (m, 3H), 5.30 (s, 1H), 3.17 (dq, *J* = 13.0, 6.6 Hz, 1H), 3.10 (dq, *J* = 13.0, 6.6 Hz, 1H), 2.95 (dd, *J* = 13.4, 8.3 Hz, 1H), 2.67 (dd, *J* = 13.4, 6.2 Hz, 1H), 2.44 – 2.35 (m, 1H), 1.37 – 1.27 (m, 2H), 1.24 – 1.10 (m, 5H), 0.85 (t, *J* = 7.3 Hz, 3H). <sup>13</sup>C NMR (126 MHz, CDCl<sub>3</sub>)  $\delta$  175.4, 139.9, 128.9, 128.3, 126.2, 43.9, 40.5, 39.0, 31.5, 19.9, 17.7, 13.6. HRMS calcd for [C<sub>14</sub>H<sub>21</sub>NONa]<sup>+</sup> (M+Na<sup>+</sup>): 242.1515, found: 242.1518.



The *ee* was determined via HPLC on a Chiralcel OD-3 column (15.0% 2-PrOH in hexanes, 1.0 mL/min);  $t_R$ : 5.3 min (major), 6.2 min (minor). The enantiomeric excess was determined to be 99%.

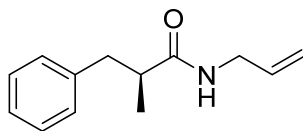

### (S)-N-Allyl-2-methyl-3-phenylpropanamide (3b)

Following **GP-1**, **3b** was synthesized from **2a** and prop-2-en-1-amine. Colorless oil. Yield: 82% (72.4 mg, 0.43 mmol).  $[\alpha]_D^{25} +48.8$  (*c* 1.0, CHCl<sub>3</sub>) {lit.<sup>[6a]</sup>  $[\alpha]_D^{24} +59.0$  (*c* 0.93, CHCl<sub>3</sub>)}. IR (film): 3288, 3083, 3027, 2923, 2854, 1732, 1644, 1549, 1455, 1372, 1259, 1081, 1031, 918, 804, 745, 700, 587, 546 cm<sup>-1</sup>. <sup>1</sup>H NMR (400 MHz, CDCl<sub>3</sub>)  $\delta$  7.34 – 7.25 (m, 2H), 7.24 – 7.15 (m, 3H), 5.81 – 5.63 (m, 1H), 5.57 (s, 1H), 5.08 – 4.94 (m, 2H), 3.92 – 3.66 (m, 2H), 2.99 (dd, *J* = 13.4, 8.3 Hz, 1H), 2.69 (dd, *J* = 13.4, 6.6 Hz, 1H), 2.58 – 2.38 (m, 1H), 1.20 (d, *J* = 6.8 Hz, 3H). <sup>13</sup>C NMR (101 MHz, CDCl<sub>3</sub>)  $\delta$  175.4, 139.8, 134.1, 128.9, 128.3, 126.2, 116.0, 43.8, 41.6, 40.4, 17.7. Spectral data match those previously reported<sup>[6b]</sup>. HRMS calcd for [C<sub>13</sub>H<sub>17</sub>NONa]<sup>+</sup> (M+Na<sup>+</sup>): 226.1202, found: 226.1204. The *ee* was determined via HPLC on a Chiralcel OD-3 column (15.0% 2-PrOH in hexanes, 1.0 mL/min);  $t_R$ : 5.2 min (major), 5.8 min (minor). The enantiomeric excess was determined to be 98%.

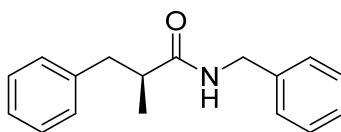

### (S)-N-Benzyl-2-methyl-3-phenylpropanamide (3c)

Following **GP-1**, **3c** was synthesized from **2a** and phenylmethanamine. White solid. Yield: 79% (57 mg, 0.28 mmol).  $[\alpha]_D^{25} +41.5$  (*c* 1.0, CHCl<sub>3</sub>) {lit.<sup>[6a]</sup>  $[\alpha]_D^{24} +52.3$  (*c* 1.24, CHCl<sub>3</sub>); lit.<sup>[7]</sup>  $[\alpha]_D^{20} +23.2$  (*c* 0.93, CHCl<sub>3</sub>)}. IR (film): 3289, 3066, 3027, 3005, 2971, 2925, 2855, 1645, 1604, 1586, 1557, 1495, 1455, 1424, 1378, 1360, 1291, 1263, 1232, 1193, 1070, 1055, 1026, 1003, 780, 746, 734, 703, 695, 603 cm<sup>-1</sup>. <sup>1</sup>H NMR (500 MHz, CDCl<sub>3</sub>)  $\delta$  7.30 –

7.18 (m, 6H), 7.18 – 7.12 (m, 2H), 7.01 (dd,  $J = 7.3, 2.0$  Hz, 2H), 5.63 (s, 1H), 4.37 (dd,  $J = 14.8, 5.7$  Hz, 1H), 4.25 (dd,  $J = 14.8, 5.0$  Hz, 1H), 2.97 (dd,  $J = 13.4, 8.6$  Hz, 1H), 2.69 (dd,  $J = 13.4, 6.1$  Hz, 1H), 2.50 – 2.43 (m, 1H), 1.21 (d,  $J = 6.7$  Hz, 3H).  $^{13}\text{C}$  NMR (126 MHz,  $\text{CDCl}_3$ )  $\delta$  175.3, 139.8, 138.1, 128.9, 128.5, 128.4, 127.6, 127.2, 126.2, 43.9, 43.3, 40.5, 17.8. Spectral data match those previously reported<sup>[6b]</sup>. HRMS calcd for  $[\text{C}_{17}\text{H}_{19}\text{NOH}]^+$  ( $\text{M}+\text{H}^+$ ): 254.1539, found: 254.1541. The *ee* was determined via HPLC on a Chiralcel OD-3 column (15.0% 2-PrOH in hexanes, 1.0 mL/min);  $t_R$ : 9.7 min (major), 10.7 min (minor). The enantiomeric excess was determined to be 99%.

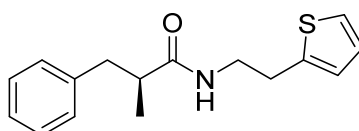

#### (S)-2-Methyl-3-phenyl-N-(2-(thiophen-2-yl)ethyl)propanamide (3d)

Following **GP-1**, **3d** was synthesized from **2a** and 2-(thiophen-2-yl)ethan-1-amine. Yellow solid. Yield: 83% (164 mg, 0.70 mmol). Mp: 67.8-68.9 °C.  $[\alpha]_D^{20} +36.8$  ( $c$  1.0,  $\text{CHCl}_3$ ); IR (film): 3294, 3084, 3027, 2965, 2929, 2872, 1647, 1549, 1495, 1453, 1368, 1247, 1079, 1031, 851, 806, 745, 699  $\text{cm}^{-1}$ .  $^1\text{H}$  NMR (500 MHz,  $\text{CDCl}_3$ )  $\delta$  7.30 – 7.23 (m, 2H), 7.20 (d,  $J = 7.3$  Hz, 1H), 7.17 – 7.13 (m, 2H), 7.13 – 7.09 (m, 1H), 6.89 (dd,  $J = 5.1, 3.4$  Hz, 1H), 6.63 (d,  $J = 3.4$  Hz, 1H), 5.45 (s, 1H), 3.45 (dq,  $J = 13.2, 6.5$  Hz, 1H), 3.37 (dq,  $J = 13.2, 6.4$  Hz, 1H), 3.01 – 2.87 (m, 2H), 2.87 – 2.74 (m, 1H), 2.65 (dd,  $J = 13.4, 6.5$  Hz, 1H), 2.38 (dt,  $J = 8.2, 6.7$  Hz, 1H), 1.15 (d,  $J = 6.8$  Hz, 3H).  $^{13}\text{C}$  NMR (126 MHz,  $\text{CDCl}_3$ )  $\delta$  175.5, 141.2, 139.8, 128.9, 128.3, 126.9, 126.2, 125.2, 123.8, 43.8, 40.5, 40.4, 29.8, 17.7. HRMS calcd for  $[\text{C}_{16}\text{H}_{19}\text{NOSH}]^+$  ( $\text{M}+\text{H}^+$ ): 274.1260, found: 274.1259. The *ee* was determined via HPLC on a Chiralcel OJ-3 column (15.0% 2-PrOH in hexanes, 1.0 mL/min);  $t_R$ : 10.7 min (minor), 12.3 min (major). The enantiomeric excess was determined to be 99%.

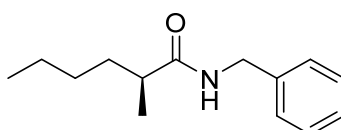

#### (S)-N-Benzyl-2-methylhexanamide (3e)

Following **GP-1**, **3e** was synthesized from **2b** and phenylmethanamine. White solid. Yield: 81% (65.8 mg, 0.37 mmol). Mp: 71.5-72.5 °C.  $[\alpha]_D^{25} +7.6$  (*c* 1.0, CHCl<sub>3</sub>); IR (film): 3285, 3034, 2956, 2925, 2872, 2855, 1636, 1537, 1497, 1454, 1385, 1368, 1261, 1240, 1208, 1120, 1099, 1027, 799, 745, 695, 579, 541 cm<sup>-1</sup>. <sup>1</sup>H NMR (400 MHz, CDCl<sub>3</sub>) δ 7.37 – 7.29 (m, 2H), 7.26 (m, 3H), 5.92 (s, 1H), 4.42 (dd, *J* = 5.7, 2.1 Hz, 2H), 2.24 – 2.15 (m, 1H), 1.76 – 1.57 (m, 1H), 1.43 – 1.35 (m, 1H), 1.31 – 1.24 (m, 4H), 1.15 (d, *J* = 6.8 Hz, 3H), 0.87 (t, *J* = 6.8 Hz, 3H). <sup>13</sup>C NMR (101 MHz, CDCl<sub>3</sub>) δ 176.5, 138.6, 128.6, 127.7, 127.3, 43.3, 41.5, 34.0, 29.7, 22.6, 17.9, 13.9. HRMS calcd for [C<sub>13</sub>H<sub>19</sub>NONa]<sup>+</sup> (*M*+Na<sup>+</sup>): 220.1696, found: 220.1698. The *ee* was determined via HPLC on a Chiralpak IC-3 column (10.0% 2-PrOH in hexanes, 1.0 mL/min); *t<sub>R</sub>*: 13.4 min (major), 14.4 min (minor). The enantiomeric excess was determined to be 99%.

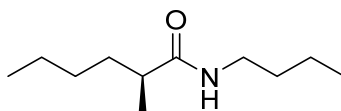

**(S)-N-Butyl-2-methylhexanamide (3f)**

Following **GP-1**, **3f** was synthesized from **2b** and butan-1-amine. Colorless oil. Yield: 72% (60 mg, 0.45 mmol).  $[\alpha]_D^{25} +14.0$  (*c* 1.0, CHCl<sub>3</sub>); IR (film): 3295, 3086, 2960, 2931, 2874, 1645, 1553, 1463, 1370, 1299, 1259, 1209, 1149, 1100, 1020, 802, 702 cm<sup>-1</sup>. <sup>1</sup>H NMR (400 MHz, CDCl<sub>3</sub>) δ 5.74 (s, 1H), 3.23 (tt, *J* = 7.1, 5.7 Hz, 2H), 2.19 – 2.08 (m, 1H), 1.70 – 1.55 (m, 1H), 1.52 – 1.42 (m, 2H), 1.40 – 1.29 (m, 3H), 1.29 – 1.18 (m, 4H), 1.10 (d, *J* = 6.9 Hz, 3H), 0.91 (t, *J* = 7.3 Hz, 3H), 0.86 (t, *J* = 7.0 Hz, 3H). <sup>13</sup>C NMR (101 MHz, CDCl<sub>3</sub>) δ 176.5, 41.5, 39.0, 34.0, 31.7, 29.6, 22.6, 20.0, 17.9, 13.9, 13.7. HRMS calcd for [C<sub>17</sub>H<sub>35</sub>NONa]<sup>+</sup> (*M*+Na<sup>+</sup>): 208.1672, found: 208.1676. The *ee* was determined via HPLC on a Chiralcel OD-3 column (1.0% 2-PrOH in hexanes, 1.0 mL/min); *t<sub>R</sub>*: 13.9 min (major), 15.9 min (minor). The enantiomeric excess was determined to be 99%.

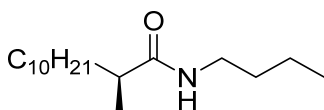

**(S)-N-Butyl-2-methyldodecanamide (3g)**

Following **GP-1**, **3g** was synthesized from **2c** and butan-1-amine. White solid. Yield: 67%

(53 mg, 0.3 mmol). Mp: 63.6-65.0 °C.  $[\alpha]_D^{25} +9.94$  (*c* 1.0, CHCl<sub>3</sub>); IR (film): 3294, 2959, 2923, 2851, 1689, 1640, 1552, 1466, 1375, 1252, 1238, 1157, 1107, 1032, 802, 721 cm<sup>-1</sup>. <sup>1</sup>H NMR (400 MHz, CDCl<sub>3</sub>) δ 5.55 (s, 1H), 3.34 – 3.16 (m, 2H), 2.16 – 2.12 (m, 1H), 1.62 (dd, *J* = 14.4, 7.3 Hz, 1H), 1.52 – 1.44 (m, 2H), 1.40 – 1.31 (m, 3H), 1.25 (s, 16H), 1.12 (d, *J* = 6.8 Hz, 3H), 0.93 (t, *J* = 7.3 Hz, 3H), 0.88 (t, *J* = 6.7 Hz, 3H). <sup>13</sup>C NMR (101 MHz, CDCl<sub>3</sub>) δ 176.5, 41.7, 39.0, 34.4, 31.9, 31.8, 29.6, 29.6, 29.5, 29.3, 27.5, 22.6, 20.0, 17.9, 14.1, 13.7. HRMS calcd for [C<sub>17</sub>H<sub>35</sub>NOH]<sup>+</sup> (M+H<sup>+</sup>): 270.2791, found: 270.2793. The *ee* was determined via HPLC on a Chiralcel OD-3 column (1.0% 2-PrOH in hexanes, 1.0 mL/min); *t<sub>R</sub>*: 11.0 min (minor), 12.3 min (major). The enantiomeric excess was determined to be 99%.

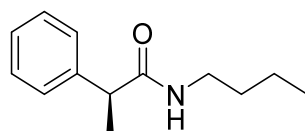

### (S)-N-Butyl-2-phenylpropanamide (3h)

Following **GP-1**, **3h** was synthesized from **2d** and butan-1-amine. Yield: 93% (92 mg, 0.45 mmol); also synthesized from **2g** and butan-1-amine Yield: 89% (71 mg, 0.38 mmol). Colorless oil.  $[\alpha]_D^{25} +20.6$  (*c* 1.0, CHCl<sub>3</sub>); IR (film): 3293, 3085, 3064, 3029, 2960, 2931, 2872, 1645, 1553, 1455, 1370, 1234, 698 cm<sup>-1</sup>. <sup>1</sup>H NMR (500 MHz, CDCl<sub>3</sub>) δ 7.36 – 7.31 (m, 2H), 7.31 – 7.28 (m, 2H), 7.28 – 7.23 (m, 1H), 5.47 (s, 1H), 3.54 (q, *J* = 7.2 Hz, 1H), 3.22 – 3.13 (m, 2H), 1.51 (d, *J* = 7.2 Hz, 3H), 1.44 – 1.33 (m, 2H), 1.27 – 1.20 (m, 2H), 0.86 (t, *J* = 7.3 Hz, 3H). <sup>13</sup>C NMR (126 MHz, CDCl<sub>3</sub>) δ 174.2, 141.6, 128.8, 127.6, 127.1, 47.0, 39.4, 31.6, 20.0, 18.6, 13.7. HRMS calcd for [C<sub>13</sub>H<sub>19</sub>NONa]<sup>+</sup> (M+Na<sup>+</sup>): 228.1359, found: 228.1362. The *ee* was determined via HPLC on a Chiralpak IC-3 column (15.0% 2-PrOH in hexanes, 1.0 mL/min); *t<sub>R</sub>*: 10.3 min (major), 11.2 min (minor). The enantiomeric excess of was determined to be 98% and 95%, respectively.

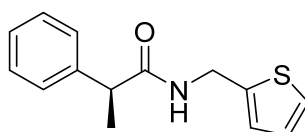

### (S)-2-Phenyl-N-(thiophen-2-ylmethyl)propanamide (3i)

Following **GP-1**, **3i** was synthesized from **2d** and thiophen-2-ylmethanamine. White solid. yield: 98% (216 mg, 0.89 mmol). Mp: 56-57 °C.  $[\alpha]_D^{25} +10.1$  (c 1.0, CHCl<sub>3</sub>); IR (film): 3290, 3070, 2978, 2929, 1648, 1601, 1541, 1497, 1452, 1370, 1229, 1187, 1156, 1069, 1012, 849, 832, 816, 739, 697, 670 cm<sup>-1</sup>. <sup>1</sup>H NMR (400 MHz, CDCl<sub>3</sub>) δ 7.39 – 7.23 (m, 5H), 7.16 (dd, *J* = 5.1, 1.3 Hz, 1H), 6.89 (dd, *J* = 5.1, 3.5 Hz, 1H), 6.83 (dd, *J* = 3.5, 1.3 Hz, 1H), 5.85 (s, 1H), 4.63 – 4.44 (m, 2H), 3.57 (q, *J* = 7.2 Hz, 1H), 1.53 (d, *J* = 7.2 Hz, 3H). <sup>13</sup>C NMR (101 MHz, CDCl<sub>3</sub>) δ 173.8, 141.1, 141.0, 128.9, 127.6, 127.2, 126.7, 125.5, 124.9, 46.9, 38.4, 18.4. HRMS calcd for [C<sub>14</sub>H<sub>15</sub>NOSH]<sup>+</sup> (M+H<sup>+</sup>): 246.0947, found: 246.0946. The *ee* was determined via HPLC on a Chiralpak IC-3 column (15.0% 2-PrOH in hexanes, 1.0 mL/min); *t<sub>R</sub>*: 14.1 min (major), 15.1 min (minor). The enantiomeric excess was determined to be 99%.

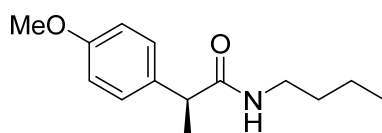

### (S)-N-Butyl-2-(4-methoxyphenyl)propanamide (3j)

Following **GP-1**, **3j** was synthesized from **2e** and butan-1-amine. White solid. Yield: 90% (81.6 mg, 0.38 mmol). Mp: 75-77 °C.  $[\alpha]_D^{25} +10.8$  (c 1.0, CHCl<sub>3</sub>); IR (film): 3299, 3085, 2960, 2928, 2860, 1645, 1557, 1463, 1455, 1369, 1251, 1235, 1034, 840, 791, 529 cm<sup>-1</sup>. <sup>1</sup>H NMR (400 MHz, CDCl<sub>3</sub>) δ 7.26 – 7.19 (m, 2H), 6.95 – 6.83 (m, 2H), 5.45 (s, 1H), 3.80 (s, 3H), 3.50 (q, *J* = 7.2 Hz, 1H), 3.22 – 3.12 (m, 2H), 1.50 (d, *J* = 7.2 Hz, 3H), 1.43 – 1.33 (m, 2H), 1.29 – 1.18 (m, 2H), 0.87 (t, *J* = 7.3 Hz, 3H). <sup>13</sup>C NMR (101 MHz, CDCl<sub>3</sub>) δ 174.5, 158.7, 133.6, 128.7, 114.2, 55.3, 46.3, 39.3, 31.6, 20.0, 18.6, 13.7. HRMS calcd for [C<sub>14</sub>H<sub>21</sub>NO<sub>2</sub>H]<sup>+</sup> (M+H<sup>+</sup>): 236.1645, found: 236.1648. The *ee* was determined via HPLC on a Chiralpak IC-3 column (15.0% 2-PrOH in hexanes, 1.0 mL/min); *t<sub>R</sub>*: 16.1 min (major), 17.5 min (minor). The enantiomeric excess was determined to be 97%.

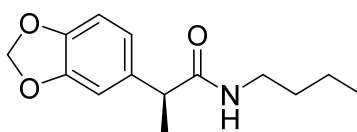

### (S)-2-(Benzo[d][1,3]dioxol-5-yl)-N-butylpropanamide (3k)

Following **GP-1**, **3k** was synthesized from **2f** and butan-1-amine. Yellow oil. Yield: 95% (74 mg, 0.31 mmol). Mp: 62-63 °C.  $[\alpha]_D^{25} +6.2$  (c 1.0, CHCl<sub>3</sub>); IR (film): 3299, 3085, 2930, 2873, 1645, 1549, 1505, 1488, 1440, 1367, 1246, 1185, 1105, 1040, 938, 814 cm<sup>-1</sup>. <sup>1</sup>H NMR (400 MHz, CDCl<sub>3</sub>) δ 6.80 (d, *J* = 1.6 Hz, 1H), 6.75 (s, 1H), 6.73 (dd, *J* = 7.9, 1.6 Hz, 1H), 5.94 (s, 2H), 5.55 (s, 1H), 3.46 (q, *J* = 7.2 Hz, 1H), 3.22 – 3.14 (m, 2H), 1.47 (d, *J* = 7.2 Hz, 3H), 1.44 – 1.35 (m, 2H), 1.31 – 1.18 (m, 2H), 0.87 (t, *J* = 7.3 Hz, 3H). <sup>13</sup>C NMR (101 MHz, CDCl<sub>3</sub>) δ 174.2, 148.0, 146.7, 135.4, 120.8, 108.4, 107.9, 101.1, 46.7, 39.4, 31.6, 20.0, 18.7, 13.7. HRMS calcd for [C<sub>14</sub>H<sub>19</sub>NO<sub>3</sub>H]<sup>+</sup> (M+H<sup>+</sup>): 250.1438, found: 250.1440. The ee was determined via HPLC on a Chiralpak IC-3 column (15.0% 2-PrOH in hexanes, 1.0 mL/min); *t<sub>R</sub>*: 19.5 min (major), 22.7 min (minor). The enantiomeric excess was determined to be 96%.

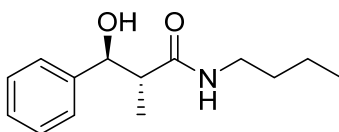

### (2R,3S)-N-Butyl-3-hydroxy-2-methyl-3-phenylpropanamide (3l)

Following **GP-1**, **3l** was synthesized from **2h** and butan-1-amine. White solid. Yield: 80% (73 mg, 0.38 mmol). Mp : 117-118 °C.  $[\alpha]_D^{20} -64.7$  (c 1.0, CHCl<sub>3</sub>); IR (film): 3316, 3064, 2960, 2922, 2873, 1747, 1641, 1549, 1454, 1373, 1212, 1156, 1088, 1053, 1015, 755, 703, 611, 546 cm<sup>-1</sup>. <sup>1</sup>H NMR (500 MHz, CDCl<sub>3</sub>) δ 7.31 (m, 4H), 7.28 – 7.23 (m, 1H), 5.93 (s, 1H), 4.69 (d, *J* = 6.3 Hz, 1H), 3.73 (brs, 1H), 3.15 (m, 2H), 2.55 – 2.43 (m, 1H), 1.40 – 1.32 (m, 2H), 1.29 – 1.16 (m, 2H), 1.13 (d, *J* = 7.0 Hz, 3H), 0.86 (t, *J* = 7.3 Hz, 3H). <sup>13</sup>C NMR (126 MHz, CDCl<sub>3</sub>) δ 175.4, 142.7, 128.3, 127.6, 126.2, 76.4, 47.9, 39.1, 31.5, 19.9, 15.6, 13.7. HRMS calcd for [C<sub>14</sub>H<sub>21</sub>NO<sub>2</sub>H]<sup>+</sup> (M+H<sup>+</sup>): 236.1645, found: 236.1647.

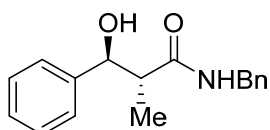

### (2R,3S)-N-Benzyl-3-hydroxy-2-methyl-3-phenylpropanamide (3m)

Following **GP-1**, **3m** was synthesized from **2h** and phenylmethanamine. White solid. Yield: 78% (124 mg, 0.59 mmol). Mp: 127-128 °C.  $[\alpha]_D^{25} -68.5$  (c 1.0, CHCl<sub>3</sub>); IR (film): 3323, 3031, 2917, 2849, 1646, 1554, 1496, 1453, 1428, 1384, 1350, 1252, 1217, 1094, 1019, 905, 841, 786, 758, 728, 702, 630, 619, 601, 557 cm<sup>-1</sup>. <sup>1</sup>H NMR (400 MHz, CDCl<sub>3</sub>) δ 7.37 – 7.31 (m, 4H), 7.31 – 7.27 (m, 2H), 7.27 – 7.26 (m, 1H), 7.26 – 7.22 (m, 1H), 7.13 – 7.07 (m, 2H), 6.17 (s, 1H), 4.70 (d, *J* = 6.5 Hz, 1H), 4.39 (dd, *J* = 14.9, 6.0 Hz, 1H), 4.28 (dd, *J* = 14.9, 5.5 Hz, 1H), 4.00 (brs, 1H), 2.65 – 2.44 (m, 1H), 1.14 (d, *J* = 7.1 Hz, 3H). <sup>13</sup>C NMR (126 MHz, CDCl<sub>3</sub>) δ 175.2, 142.6, 137.8, 128.7, 128.5, 127.7, 127.6, 127.5, 126.2, 76.4, 48.1, 43.3, 15.6. HRMS calcd for [C<sub>17</sub>H<sub>19</sub>NO<sub>2</sub>Na]<sup>+</sup> (M+Na<sup>+</sup>): 292.1308, found: 292.1306.

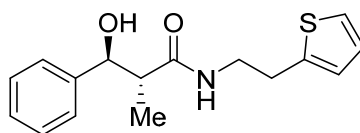

**(2R,3S)-3-Hydroxy-2-methyl-3-phenyl-N-(2-(thiophen-2-yl)ethyl)propanamide(3n)**

Following **GP-1**, **3n** was synthesized from **2h** and 2-(thiophen-2-yl)ethan-1-amine. White solid. Yield: 68% (115 mg, 0.59 mmol). Mp: 116-117 °C.  $[\alpha]_D^{22} -50.3$  (c 1.0, CHCl<sub>3</sub>); IR (film): 3304, 2966, 2917, 2849, 1643, 1546, 1453, 1384, 1215, 1094, 1018, 912, 854, 824, 758, 692, 541 cm<sup>-1</sup>. <sup>1</sup>H NMR (500 MHz, CDCl<sub>3</sub>) δ 7.36 – 7.31 (m, 3H), 7.30 – 7.27 (m, 2H), 7.14 (dd, *J* = 5.1, 1.2 Hz, 1H), 6.91 (dd, *J* = 5.1, 3.4 Hz, 1H), 6.70 (dd, *J* = 3.4, 1.2 Hz, 1H), 5.80 (s, 1H), 4.71 (d, *J* = 6.5 Hz, 1H), 3.68 – 3.27 (m, 2H), 2.98 (dt, *J* = 15.1, 6.6 Hz, 1H), 2.89 (dt, *J* = 15.1, 6.6 Hz, 1H), 2.50 – 2.41 (m, 1H), 1.12 (d, *J* = 7.1 Hz, 3H). <sup>13</sup>C NMR (126 MHz, CDCl<sub>3</sub>) δ 175.4, 142.5, 141.1, 128.4, 127.7, 127.0, 126.2, 125.4, 124.0, 76.5, 48.0, 40.6, 29.8, 15.5. HRMS calcd for [C<sub>16</sub>H<sub>19</sub>NO<sub>2</sub>SH]<sup>+</sup> (M+H<sup>+</sup>): 290.1209, found: 290.1207.

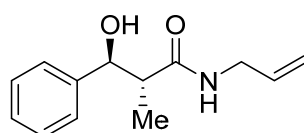

**(2R,3S)-N-Allyl-3-hydroxy-2-methyl-3-phenylpropanamide (3o)**

Following **GP-1**, **3o** was synthesized from **2h** and prop-2-en-1-amine. White solid. Yield: 66% (85 mg, 0.59 mmol). Mp: 109-111 °C.  $[\alpha]_D^{22} -77.7$  (*c* 1.0, CHCl<sub>3</sub>); IR (film): 3294, 3084, 3031, 2971, 2917, 2850, 1748, 1644, 1550, 1453, 1377, 1258, 1214, 1092, 1057, 1018, 919, 758, 701 cm<sup>-1</sup>. <sup>1</sup>H NMR (500 MHz, CDCl<sub>3</sub>) δ 7.34 – 7.28 (m, 4H), 7.27 – 7.22 (m, 1H), 6.21 (t, *J* = 6.0 Hz, 1H), 5.76 – 5.62 (m, 1H), 5.04 (t, *J* = 1.7 Hz, 1H), 5.01 (dq, *J* = 7.1, 1.5 Hz, 1H), 4.68 (dd, *J* = 7.0, 3.1 Hz, 1H), 4.16 (d, *J* = 5.1 Hz, 1H), 3.85 – 3.70 (m, 2H), 2.54 (p, *J* = 7.0 Hz, 1H), 1.10 (d, *J* = 7.0 Hz, 3H). <sup>13</sup>C NMR (126 MHz, CDCl<sub>3</sub>) δ 175.4, 142.5, 133.8, 128.2, 127.5, 126.2, 115.9, 76.2, 47.7, 41.5, 15.4. HRMS calcd for [C<sub>13</sub>H<sub>17</sub>NO<sub>2</sub>H]<sup>+</sup> (*M*+H<sup>+</sup>): 220.1332, found: 220.1332.

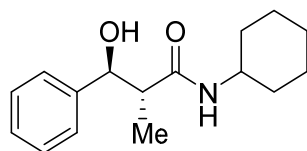

**(2R,3S)-N-Cyclohexyl-3-hydroxy-2-methyl-3-phenylpropanamide (3p)**

Following **GP-1**, **3p** was synthesized from **2h** and cyclohexanamine. White solid. Yield: 81% (62 mg, 0.29 mmol). Mp: 198-200 °C.  $[\alpha]_D^{25} -91.0$  (*c* 1.0, CHCl<sub>3</sub>); IR (film): 3433, 3290, 2917, 2849, 1637, 1547, 1453, 1212, 1094, 1018, 753, 699, 648, 583 cm<sup>-1</sup>. <sup>1</sup>H NMR (500 MHz, CDCl<sub>3</sub>) δ 7.35 – 7.30 (m, 4H), 7.26 – 7.23 (m, 1H), 5.46 (d, *J* = 8.3 Hz, 1H), 4.72 (t, *J* = 4.7 Hz, 1H), 4.17 (d, *J* = 5.2 Hz, 1H), 3.77 – 3.61 (m, 1H), 2.47 – 2.40 (m, 1H), 1.89 – 1.79 (m, 1H), 1.79 – 1.69 (m, 2H), 1.69 – 1.53 (m, 2H), 1.35 – 1.25 (m, 2H), 1.18 (d, *J* = 7.1 Hz, 3H), 1.13 – 1.01 (m, 2H), 0.93 (tdd, *J* = 12.3, 10.6, 3.5 Hz, 1H). <sup>13</sup>C NMR (126 MHz, CDCl<sub>3</sub>) δ 174.4, 142.8, 128.3, 127.5, 126.1, 76.4, 48.0, 32.8, 25.4, 24.7, 24.7, 15.6. HRMS calcd for [C<sub>16</sub>H<sub>23</sub>NO<sub>2</sub>H]<sup>+</sup> (*M*+H<sup>+</sup>): 262.1802, found: 262.1800.

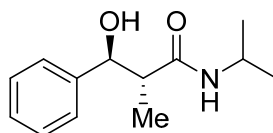

**(2R,3S)-3-Hydroxy-N-isopropyl-2-methyl-3-phenylpropanamide (3q)**

Following **GP-1**, **3q** was synthesized from **2h** and propan-2-amine. White solid. Yield: 70% (61 mg, 0.38 mmol). Mp: 135-136 °C.  $[\alpha]_D^{20} -83.3$  (*c* 1.0, CHCl<sub>3</sub>); IR (film): 3440, 3304,



3030, 2973, 2922, 1640, 1548, 1454, 1366, 1216, 1132, 1055, 1017, 926, 757, 702, 610, 544  $\text{cm}^{-1}$ .  $^1\text{H}$  NMR (500 MHz,  $\text{CDCl}_3$ )  $\delta$  7.35 – 7.26 (m, 4H), 7.28 – 7.21 (m, 1H), 5.72 (d,  $J$  = 8.1 Hz, 1H), 4.68 (t,  $J$  = 6.0 Hz, 1H), 4.33 (d,  $J$  = 6.0 Hz, 1H), 4.04 – 3.90 (m, 1H), 2.49 – 2.39 (m, 1H), 1.13 (d,  $J$  = 7.1 Hz, 3H), 1.06 (d,  $J$  = 6.6 Hz, 3H), 0.97 (d,  $J$  = 6.6 Hz, 3H).  $^{13}\text{C}$  NMR (126 MHz,  $\text{CDCl}_3$ )  $\delta$  174.4, 142.7, 128.2, 127.4, 126.0, 76.3, 47.7, 41.1, 22.4, 22.4, 15.5. HRMS calcd for  $[\text{C}_{13}\text{H}_{19}\text{NO}_2\text{H}]^+$  ( $\text{M}+\text{H}^+$ ): 222.1489, found: 222.1488.

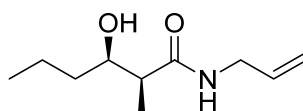

**(2S,3R)-N-Allyl-3-hydroxy-2-methylhexanamide (3r)**

Following **GP-1**, **3r** was synthesized from **2i** and prop-2-en-1-amine. White solid. Yield: 70% (47 mg, 0.36 mmol).  $[\alpha]_{\text{D}}^{20} +5.9$  ( $c$  1.0,  $\text{CHCl}_3$ ) {lit.<sup>10</sup>  $[\alpha]_{\text{D}}^{18} -11.2$  ( $c$  1.12,  $\text{CHCl}_3$ ) for (2R,3S)-enantiomer}. IR (film): 3279, 2926, 1748, 1638, 1552, 1456, 1259, 1056, 971, 921, 803, 718  $\text{cm}^{-1}$ .  $^1\text{H}$  NMR (400 MHz,  $\text{CDCl}_3$ )  $\delta$  6.01 (s, 1H), 5.91 – 5.76 (m, 1H), 5.29 – 5.10 (m, 2H), 3.89 (t,  $J$  = 5.4 Hz, 3H), 2.66 (s, 1H), 2.40 – 2.27 (m, 1H), 1.59 – 1.41 (m, 2H), 1.40 – 1.29 (m, 2H), 1.18 (d,  $J$  = 7.0 Hz, 3H), 0.94 (t,  $J$  = 6.9 Hz, 3H).  $^{13}\text{C}$  NMR (101 MHz,  $\text{CDCl}_3$ )  $\delta$  176.3, 134.1, 116.4, 71.8, 44.8, 41.7, 35.8, 19.2, 14.0, 11.2. HRMS calcd for  $[\text{C}_{10}\text{H}_{19}\text{NO}_2\text{Na}]^+$  ( $\text{M}+\text{Na}^+$ ): 208.1308, found: 208.1311.

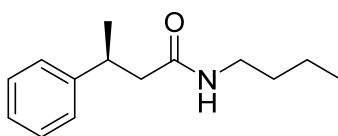

**(S)-N-Butyl-3-phenylbutanamide (3s)**

Following **GP-1**, **3s** was synthesized from **2j** and butan-1-amine. Colorless oil. Yield: 77% (61 mg, 0.36 mmol).  $[\alpha]_{\text{D}}^{25} -25.3$  ( $c$  0.94,  $\text{CHCl}_3$ ) {lit.<sup>11</sup>  $[\alpha]_{\text{D}}^{25} -25.2$  ( $c$  1.13,  $\text{CHCl}_3$ )}. IR (film): 3302, 3085, 3028, 2961, 2930, 2872, 1643, 1556, 1494, 1453, 1376, 1260, 1225, 1082, 1019, 912, 803, 761, 699, 538  $\text{cm}^{-1}$ .  $^1\text{H}$  NMR (500 MHz,  $\text{CDCl}_3$ )  $\delta$  7.33 – 7.25 (m, 2H), 7.25 – 7.15 (m, 3H), 5.53 (s, 1H), 3.37 – 3.23 (m, 1H), 3.20 – 3.06 (m, 2H), 2.47 – 2.34 (m, 2H), 1.34 – 1.25 (m, 5H), 1.23 – 1.13 (m, 2H), 0.85 (t,  $J$  = 7.3 Hz, 3H).  $^{13}\text{C}$  NMR (126 MHz,  $\text{CDCl}_3$ )  $\delta$  171.5, 145.9, 128.4, 126.7, 126.3, 45.8, 39.0, 37.0, 31.5, 21.6, 19.8, 13.6.

HRMS calcd for  $[C_{14}H_{21}NOH]^+$  ( $M+H^+$ ): 220.1696, found: 220.1698. The *ee* was determined via HPLC on a Chiralcel OD-3 column (15.0% 2-PrOH in hexanes, 1.0 mL/min);  $t_R$ : 6.2 min (major), 7.0 min (minor). The enantiomeric excess was determined to be 99%.

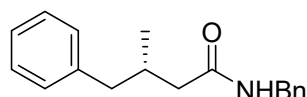

**(S)-N-Benzyl-3-methyl-4-phenylbutanamide (3t)**

Following **GP-1**, **3t** was synthesized from **2k** and phenylmethanamine. Colorless oil. Yield: 74% (122 mg, 0.62 mmol).  $[\alpha]_D^{25} +5.0$  (*c* 1.0,  $CHCl_3$ ). IR (film): 3288, 3063, 3028, 2959, 2924, 2870, 1644, 1549, 1496, 1454, 1378, 1261, 1164, 1093, 1029, 802, 738, 699  $cm^{-1}$ .  $^1H$  NMR (500 MHz,  $CDCl_3$ )  $\delta$  7.36 – 7.28 (m, 2H), 7.25 (tt, *J* = 6.3, 1.7 Hz, 5H), 7.20 – 7.15 (m, 1H), 7.15 – 7.11 (m, 2H), 5.76 (s, 1H), 4.47 – 4.35 (m, 2H), 2.65 (dd, *J* = 13.4, 6.5 Hz, 1H), 2.48 (dd, *J* = 13.4, 7.8 Hz, 1H), 2.40 – 2.27 (m, 1H), 2.24 (dd, *J* = 14.0, 5.8 Hz, 1H), 1.97 (dd, *J* = 14.0, 8.3 Hz, 1H), 0.94 (d, *J* = 6.6 Hz, 3H).  $^{13}C$  NMR (126 MHz,  $CDCl_3$ )  $\delta$  172.1, 140.2, 138.3, 129.2, 128.6, 128.2, 127.7, 127.4, 125.9, 43.5, 43.5, 43.1, 32.6, 19.5. HRMS calcd for  $[C_{18}H_{21}NOH]^+$  ( $M+H^+$ ): 268.1696, found: 268.1691. The *ee* was determined via HPLC on a Chiralcel OJ-H column (15.0% 2-PrOH in hexanes, 1.0 mL/min);  $t_R$ : 3.672 min (major), 3.866 min (minor). The enantiomeric excess was determined to be 94%.

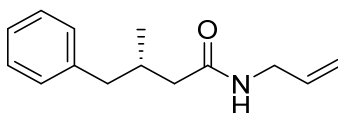

**(S)-N-Allyl-3-methyl-4-phenylbutanamide (3u)**

Following **GP-1**, **3u** was synthesized from **2k** and prop-2-en-1-amine. Colorless oil. Yield: 58% (78 mg, 0.62 mmol).  $[\alpha]_D^{25} +3.5$  (*c* 1.0,  $CHCl_3$ ). IR (film): 3291, 3083, 3027, 2961, 2922, 2870, 2850, 1644, 1549, 1496, 1454, 1418, 1379, 1261, 1093, 1030, 918, 804, 741, 700  $cm^{-1}$ .  $^1H$  NMR (500 MHz,  $CDCl_3$ )  $\delta$  7.31 – 7.23 (m, 2H), 7.19 (d, *J* = 7.5 Hz, 1H), 7.18 – 7.13 (m, 2H), 5.96 – 5.75 (m, 1H), 5.68 (s, 1H), 5.24 – 5.04 (m, 2H), 3.97 – 3.77 (m, 2H), 2.65 (dd, *J* = 13.4, 6.5 Hz, 1H), 2.48 (dd, *J* = 13.4, 7.7 Hz, 1H), 2.39 – 2.25 (m, 1H), 2.23

(dd,  $J = 14.0, 5.7$  Hz, 1H), 1.97 (dd,  $J = 14.0, 8.3$  Hz, 1H), 0.94 (d,  $J = 6.6$  Hz, 3H).  $^{13}\text{C}$  NMR (126 MHz,  $\text{CDCl}_3$ )  $\delta$  172.1, 140.2, 134.3, 129.2, 128.2, 125.9, 116.3, 43.5, 43.1, 41.8, 32.5, 19.5. HRMS calcd for  $[\text{C}_{14}\text{H}_{19}\text{NOH}]^+$  ( $\text{M}+\text{H}^+$ ): 218.1539, found: 218.1539. The *ee* was determined via HPLC on a Chiralpak AD-H column (10.0% 2-PrOH in hexanes, 1.0 mL/min);  $t_R$ : 10.385 min (major), 15.288 min (minor). The enantiomeric excess was determined to be 95%.

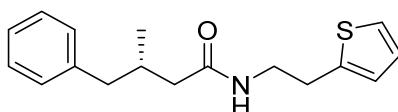

### (*S*)-3-Methyl-4-phenyl-*N*-(2-(thiophen-2-yl)ethyl)butanamide (**3v**)

Following **GP-1**, **3v** was synthesized from **2k** and 2-(thiophen-2-yl)ethan-1-amine. Yellow oil. Yield: 58% (103 mg, 0.62 mmol).  $[\alpha]_D^{25} +3.4$  ( $c$  1.0,  $\text{CHCl}_3$ ). IR (film): 3296, 3066, 3026, 2957, 2921, 2850, 1644, 1548, 1496, 1454, 1378, 1261, 1167, 1095, 1029, 850, 803, 741, 699, 593  $\text{cm}^{-1}$ .  $^1\text{H}$  NMR (500 MHz,  $\text{CDCl}_3$ )  $\delta$  7.28 – 7.23 (m, 2H), 7.21 – 7.16 (m, 1H), 7.16 – 7.11 (m, 3H), 6.93 (dd,  $J = 5.2, 3.4$  Hz, 1H), 6.85 – 6.75 (m, 1H), 5.65 (t,  $J = 6.2$  Hz, 1H), 3.51 (q,  $J = 6.5$  Hz, 2H), 3.01 (t,  $J = 6.6$  Hz, 2H), 2.62 (dd,  $J = 13.4, 6.5$  Hz, 1H), 2.45 (dd,  $J = 13.4, 7.8$  Hz, 1H), 2.35 – 2.23 (m, 1H), 2.17 (dd,  $J = 14.0, 5.8$  Hz, 1H), 1.91 (dd,  $J = 14.0, 8.3$  Hz, 1H), 0.90 (d,  $J = 6.6$  Hz, 3H).  $^{13}\text{C}$  NMR (126 MHz,  $\text{CDCl}_3$ )  $\delta$  172.3, 141.3, 140.2, 129.2, 128.2, 127.0, 125.9, 125.3, 123.9, 43.6, 43.0, 40.7, 32.5, 29.9, 19.5. HRMS calcd for  $[\text{C}_{17}\text{H}_{21}\text{NOSH}]^+$  ( $\text{M}+\text{H}^+$ ): 288.1417, found: 288.1413. The *ee* was determined via HPLC on a Chiralpak AD-H column (15.0% 2-PrOH in hexanes, 1.0 mL/min);  $t_R$ : 5.966 min (major), 7.011 min (minor). The enantiomeric excess was determined to be 95%.

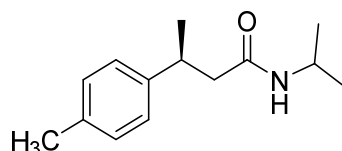

### (*S*)-*N*-Isopropyl-3-(*p*-tolyl)butanamide (**3w**)

Following **GP-1**, **3w** was synthesized from **2l** and propan-2-amine. White solid. Yield: 54% (90 mg, 0.77 mmol). Mp: 95–97 °C.  $[\alpha]_D^{25} +22.8$  ( $c$  1.0,  $\text{CHCl}_3$ ). IR (film): 3301, 2972, 2916,

2849, 1634, 1541, 1516, 1375, 1094, 1019, 816, 692, 617, 602  $\text{cm}^{-1}$ .  $^1\text{H}$  NMR (400 MHz,  $\text{CDCl}_3$ )  $\delta$  7.10 (s, 4H), 5.23 (d,  $J = 7.2$  Hz, 1H), 4.03 – 3.91 (m, 1H), 3.30 – 3.17 (m, 1H), 2.34 (dd,  $J = 7.5, 1.8$  Hz, 2H), 2.31 (s, 3H), 1.28 (d,  $J = 7.0$  Hz, 3H), 1.05 (d,  $J = 6.6$  Hz, 3H), 0.94 (d,  $J = 6.6$  Hz, 3H).  $^{13}\text{C}$  NMR (101 MHz,  $\text{CDCl}_3$ )  $\delta$  170.8, 142.8, 135.8, 129.1, 126.6, 46.1, 41.0, 36.7, 22.6, 22.5, 21.6, 20.9. HRMS calcd for  $[\text{C}_{14}\text{H}_{21}\text{NOH}]^+$  ( $\text{M}+\text{H}^+$ ): 220.1696, found: 220.1695. The *ee* was determined via HPLC on a Chiralcel OD-H column (15.0% 2-PrOH in hexanes, 1.0 mL/min);  $t_R$ : 6.044 min (minor), 6.402 min (major). The enantiomeric excess was determined to be 97%.

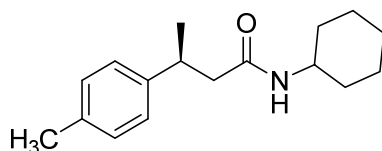

#### **(S)-N-Cyclohexyl-3-(*p*-tolyl)butanamide (3x)**

Following **GP-1**, **3x** was synthesized from **2I** and cyclohexanamine. White solid. Yield: 55% (44 mg, 0.31 mmol). Mp: 128-129  $^{\circ}\text{C}$ .  $[\alpha]_D^{25} +22.8$  ( $c$  1.0,  $\text{CHCl}_3$ ). IR (film): 3295, 3070, 2932, 2854, 1738, 1636, 1544, 1515, 1448, 1422, 1379, 1306, 1260, 1209, 1189, 1152, 1087, 1020, 987, 961, 891, 818, 721, 610, 568, 534  $\text{cm}^{-1}$ .  $^1\text{H}$  NMR (500 MHz,  $\text{CDCl}_3$ )  $\delta$  7.10 (s, 4H), 5.15 (d,  $J = 8.2$  Hz, 1H), 3.76 – 3.60 (m, 1H), 3.27 – 3.17 (m, 1H), 2.36 (dd,  $J = 7.5, 4.9$  Hz, 2H), 2.31 (s, 3H), 1.87 – 1.77 (m, 1H), 1.74 – 1.64 (m, 1H), 1.64 – 1.46 (m, 3H), 1.39 – 1.18 (m, 5H), 1.18 – 1.04 (m, 1H), 1.04 – 0.96 (m, 1H), 0.89 (tdd,  $J = 12.1, 10.5, 3.6$  Hz, 1H).  $^{13}\text{C}$  NMR (126 MHz,  $\text{CDCl}_3$ )  $\delta$  170.7, 142.8, 135.8, 129.1, 126.6, 47.8, 46.2, 36.7, 33.0, 32.8, 25.5, 24.7, 24.6, 21.7, 20.9. HRMS calcd for  $[\text{C}_{17}\text{H}_{25}\text{NOH}]^+$  ( $\text{M}+\text{H}^+$ ): 260.2009, found: 260.2008. The *ee* was determined via HPLC on a Chiralpak AD-H column (10.0% 2-PrOH in hexanes, 1.0 mL/min);  $t_R$ : 7.580 min (major), 9.004 min (minor). The enantiomeric excess was determined to be 98%.

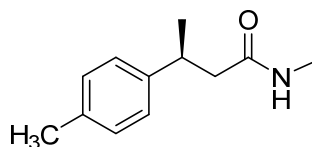

#### **(S)-N-Methyl-3-(*p*-tolyl)butanamide (3y)**

Following **GP-1**, **3y** was synthesized from **2m** and methylamine as a white solid. Yield: 75% (2.79 g, 14.5 mmol). Mp: 85.3-86.3 °C.  $[\alpha]_D^{25} +31.4$  (c 0.5, CHCl<sub>3</sub>). IR (film): 3457, 2961, 1644, 1560, 1515, 1455, 1411, 1159, 1105, 816, 702, 543 cm<sup>-1</sup>. <sup>1</sup>H NMR (400 MHz, CDCl<sub>3</sub>) δ 7.11 (s, 4H), 5.37 (s, 1H), 3.41 – 3.16 (m, 1H), 2.71 (d, *J* = 3.3 Hz, 3H), 2.50 – 2.33 (m, 2H), 2.31 (s, 3H), 1.28 (d, *J* = 6.8 Hz, 3H). <sup>13</sup>C NMR (101 MHz, CDCl<sub>3</sub>) δ 172.5, 142.8, 135.9, 129.2, 126.6, 45.8, 36.5, 26.3, 21.7, 21.0. HRMS calcd for [C<sub>12</sub>H<sub>17</sub>NOH]<sup>+</sup> (M+H<sup>+</sup>): 192.1383, found: 192.1384. The *ee* was determined via HPLC on a Chiralpak AD-H column (5.0% 2-PrOH in hexanes, 1.0 mL/min); *t<sub>R</sub>*: 12.9 min (major), 15.1 min (minor). The enantiomeric excess was determined to be 98%.

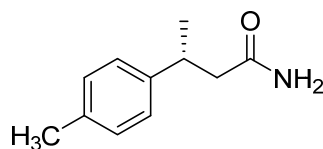

#### (*R*)-3-(*p*-Tolyl)butanamide (**3z**)

Following **GP-1**, **3z** was synthesized from **2n** and ammonia. White solid. Yield: 71% (25 mg, 0.2 mmol). Mp: 103.4-103.9 °C.  $[\alpha]_D^{25} -5.2$  (c 1.0, CHCl<sub>3</sub>). IR (film): 3393, 3199, 2957, 2920, 1651, 1409, 1130, 812 cm<sup>-1</sup>. <sup>1</sup>H NMR (400 MHz, CDCl<sub>3</sub>) δ 7.12 (d, *J* = 1.7 Hz, 4H), 5.35 (s, 1H), 5.23 (s, 1H), 3.35 – 3.14 (m, 1H), 2.50 (ddd, *J* = 14.3, 7.4, 2.7 Hz, 1H), 2.42 (ddd, *J* = 14.3, 7.4, 2.5 Hz, 1H), 2.31 (s, 3H), 1.31 (d, *J* = 7.0, 3H). <sup>13</sup>C NMR (101 MHz, CDCl<sub>3</sub>) δ 174.2, 142.7, 136.0, 129.3, 126.6, 45.0, 36.4, 21.9, 21.0. HRMS calcd for [C<sub>11</sub>H<sub>15</sub>NOH]<sup>+</sup> (M+H<sup>+</sup>): 178.1226, found: 178.1228. The *ee* was determined via HPLC on a Chiralpak AD-H column (5.0% 2-PrOH in hexanes, 1.0 mL/min); *t<sub>R</sub>*: 11.6 min (minor), 14.7 min (major). The enantiomeric excess was determined to be 97%.

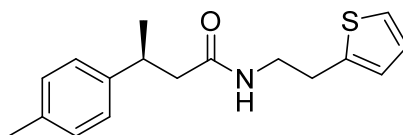

#### (*S*)-*N*-(2-(Thiophen-2-yl)ethyl)-3-(*p*-tolyl)butanamide (**3aa**)

Following **GP-1**, **3aa** was synthesized from **2m** and 2-(thiophen-2-yl)ethan-1-amine. Yellow solid. Yield: 72% (41 mg, 0.2 mmol). Mp: 73.5-74.3 °C.  $[\alpha]_D^{25} +22.4$  (c 1.0, CHCl<sub>3</sub>).

IR (film): 3301, 2960, 2920, 1644, 1551, 1514, 1434, 1350, 1017, 816, 695  $\text{cm}^{-1}$ .  $^1\text{H}$  NMR (400 MHz,  $\text{CDCl}_3$ )  $\delta$  7.14 (dd,  $J = 5.1, 1.1$  Hz, 1H), 7.09 (s, 4H), 6.91 (dd,  $J = 5.1, 3.4$  Hz, 1H), 6.66 (dd,  $J = 3.4, 1.1$  Hz, 1H), 5.40 (s, 1H), 3.54 – 3.32 (m, 2H), 3.31 – 3.14 (m, 1H), 3.01 – 2.76 (m, 2H), 2.37 (dd,  $J = 7.5, 4.2$  Hz, 2H), 2.31 (s, 3H), 1.27 (d,  $J = 7.0$  Hz, 3H).  $^{13}\text{C}$  NMR (101 MHz,  $\text{CDCl}_3$ )  $\delta$  171.7, 142.8, 141.3, 135.9, 129.2, 127.0, 126.6, 125.3, 123.8, 45.9, 40.6, 36.5, 29.8, 21.8, 21.0. HRMS calcd for  $[\text{C}_{17}\text{H}_{21}\text{NOSH}]^+$  ( $\text{M}+\text{H}^+$ ): 288.1417, found: 288.1418. The *ee* was determined via HPLC on a Chiralcel OD-H column (5.0% 2-PrOH in hexanes, 1.0 mL/min);  $t_R$ : 35.3 min (minor), 39.9 min (major). The enantiomeric excess was determined to be 95%.

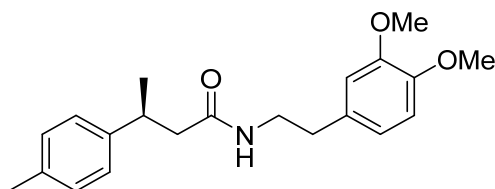

**(S)-N-(3,4-Dimethoxyphenethyl)-3-(p-tolyl)butanamide (3ab)**

Following **GP-1**, **3ab** was synthesized from **2m** and 2-(3,4-dimethoxyphenyl)ethan-1-amine as a white solid. Yield: 83% (141.9 mg, 0.42 mmol).  $[\alpha]_D^{20} +5.0$  ( $c$  1.0,  $\text{CHCl}_3$ ). IR (film): 3304, 3057, 3000, 2962, 2938, 2870, 2839, 1637, 1544, 1516, 1456, 1259, 1236, 1157, 1144, 1028, 963, 894, 850, 808, 765, 731, 630, 534  $\text{cm}^{-1}$ .  $^1\text{H}$  NMR (500 MHz,  $\text{CDCl}_3$ )  $\delta$  7.08 (s, 4H), 6.76 (d,  $J = 8.1$  Hz, 1H), 6.65 (d,  $J = 2.1$  Hz, 1H), 6.58 (dd,  $J = 8.1, 2.1$  Hz, 1H), 5.51 (t,  $J = 5.9$  Hz, 1H), 3.85 (s, 3H), 3.84 (s, 3H), 3.49 – 3.32 (m, 2H), 3.28 – 3.17 (m, 1H), 2.65 (dt,  $J = 14.0, 6.9$  Hz, 1H), 2.59 (dt,  $J = 14.0, 7.2$  Hz, 1H), 2.41 – 2.32 (m, 2H), 2.31 (s, 3H), 1.26 (d,  $J = 6.9$  Hz, 3H).  $^{13}\text{C}$  NMR (126 MHz,  $\text{CDCl}_3$ )  $\delta$  171.7, 148.9, 147.5, 142.7, 135.7, 131.3, 129.1, 126.5, 120.5, 111.7, 111.2, 55.8, 55.7, 45.7, 40.5, 36.4, 35.1, 21.6, 20.9. HRMS calcd for  $[\text{C}_{21}\text{H}_{27}\text{NO}_3\text{Na}]^+$  ( $\text{M}+\text{Na}^+$ ): 364.1883, found: 364.1885. The *ee* was determined via HPLC on a Chiralcel AD-H column (10.0% 2-PrOH in hexanes, 1.0 mL/min);  $t_R$ : 14.7 min (major), 16.6 min (minor). The enantiomeric excess was determined to be 99%.

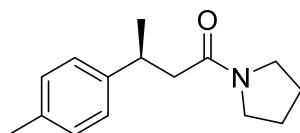

### (S)-1-(Pyrrolidin-1-yl)-3-(*p*-tolyl)butan-1-one (3ad)

Following **GP-1**, **3ad** was synthesized from **2m** and pyrrolidine. Colorless oil. Yield: 85% (39 mg, 0.2 mmol).  $[\alpha]_D^{25} +43.5$  (c 0.5,  $\text{CHCl}_3$ ). IR (film): 2944, 2912, 1646, 1547, 1434, 1291, 816, 714  $\text{cm}^{-1}$ .  $^1\text{H NMR}$  (400 MHz,  $\text{CDCl}_3$ )  $\delta$  7.24 – 7.06 (m, 4H), 3.50 – 3.28 (m, 4H), 3.20 – 3.10 (m, 1H), 2.57 – 2.40 (m, 2H), 2.31 (s, 2H), 1.90 – 1.75 (m, 4H), 1.32 (d,  $J = 7.0$  Hz, 3H).  $^{13}\text{C NMR}$  (101 MHz,  $\text{CDCl}_3$ )  $\delta$  171.7, 142.8, 141.3, 135.9, 129.2, 127.0, 126.6, 125.3, 123.8, 45.9, 40.6, 36.5, 29.8, 21.8, 21.0. HRMS calcd for  $[\text{C}_{15}\text{H}_{21}\text{NNaO}]^+$  ( $\text{M}+\text{Na}^+$ ): 254.1521, found: 254.1524. The *ee* was determined via HPLC on a Chiralcel AD-H column (10% 2-PrOH in hexanes, 1.0 mL/min);  $t_R$ : 15.4 min (major), 17.8 min (minor). The enantiomeric excess was determined to be 98%.

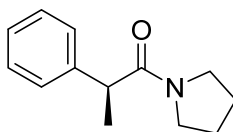

### (S)-2-Phenyl-1-(pyrrolidin-1-yl)propan-1-one (3ae)

Following **GP-1**, **3ae** was synthesized from **2d** and pyrrolidine. Colorless oil. (30 mg, 0.34 mmol, yield: 50%).  $[\alpha]_D^{25} +62.5$  (c 1.0,  $\text{CHCl}_3$ ); IR (film): 2972, 2927, 2870, 1640, 1489, 1457, 1424, 1373, 1339, 1303, 1257, 1192, 1061, 1034, 804, 756, 726, 702, 586, 575  $\text{cm}^{-1}$ .  $^1\text{H NMR}$  (400 MHz,  $\text{CDCl}_3$ )  $\delta$  7.30 (m, 4H), 7.28 – 7.17 (m, 1H), 3.73 (q,  $J = 6.9$  Hz, 1H), 3.54 (dt,  $J = 12.2, 6.1$  Hz, 1H), 3.51 – 3.36 (m, 2H), 3.21 – 3.10 (m, 1H), 1.88 (d,  $J = 6.1$  Hz, 1H), 1.78 (m, 3H), 1.45 (d,  $J = 6.9$  Hz, 3H).  $^{13}\text{C NMR}$  (101 MHz,  $\text{CDCl}_3$ )  $\delta$  172.1, 141.7, 128.7, 127.5, 126.6, 46.2, 46.0, 45.0, 26.0, 24.1, 20.3. HRMS calcd for  $[\text{C}_{13}\text{H}_{17}\text{NOH}]^+$  ( $\text{M}+\text{H}^+$ ): 204.1383, found: 204.1383. The *ee* was determined via HPLC on a CHIRALPAK AD-3 column (15.0% 2-PrOH in hexanes, 1.0 mL/min);  $t_R$ : 5.3 min (major), 6.2 min (minor). The enantiomeric excess was determined to be 87%.

#### IV. Transformations of the transamidation products: (Chiral) amides

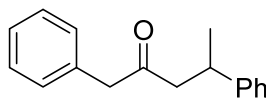

##### 1,4-Diphenylpentan-2-one (4a)

Tf<sub>2</sub>O (0.55 mmol, 1.1 equiv) was added dropwise to a solution of secondary amide **3ac** (0.5 mmol, 1.0 equiv) and 2-fluoropyridine (0.6 mmol, 1.2 equiv) in CH<sub>2</sub>Cl<sub>2</sub> (2 mL, 0.25 mol/L) at 0 °C. After being stirred for 15 min at 0 °C, prop-1-en-2-ylbenzene (0.6 mmol, 1.2 equiv) was added dropwise to the solution. The mixture was warmed up to room temperature and stirred for 3 h. Quenched with saturated aqueous NH<sub>4</sub>Cl solution (3 mL), the mixture was extracted with CH<sub>2</sub>Cl<sub>2</sub> (3 × 10 mL). The combined organic layers were washed with saturated Na<sub>2</sub>CO<sub>3</sub> aqueous solution (5 mL) and brine (5 mL), dried over anhydrous Na<sub>2</sub>SO<sub>4</sub>. The volatiles were removed under reduced pressure. The residue was purified by column chromatography on silica gel (Ether / Petroleum ether = 1 / 50) to give the desired ketone **4a** as a colorless oil in 65% yield (85 mg). IR (film): 3062, 3029, 2964, 2931, 1705, 1603, 1584, 1495, 1453, 1414, 1376, 1318, 1285, 1177, 1114, 1071, 1026, 762, 700 cm<sup>-1</sup>. <sup>1</sup>H NMR (400 MHz, CDCl<sub>3</sub>) δ 7.33 – 7.18 (m, 5H), 7.22 – 7.10 (m, 3H), 7.12 – 7.04 (m, 2H), 3.55 (s, 2H), 3.30 (h, *J* = 7.0 Hz, 1H), 2.76 (dd, *J* = 16.4, 6.6 Hz, 1H), 2.64 (dd, *J* = 16.4, 7.7 Hz, 1H), 1.21 (d, *J* = 7.0 Hz, 3H). <sup>13</sup>C NMR (151 MHz, CDCl<sub>3</sub>) δ 207.1, 146.0, 133.9, 129.4, 128.6, 128.5, 126.9, 126.7, 126.2, 50.7, 50.2, 35.4, 21.8. HRMS calcd for [C<sub>17</sub>H<sub>18</sub>OH]<sup>+</sup> (M+H<sup>+</sup>): 239.1430, found: 239.1429.

##### General procedure 2 (GP-2)

Tf<sub>2</sub>O (1.1 equiv) was added dropwise to a solution of secondary amide (1.0 equiv) and 2-fluoropyridine (1.2 equiv) in CH<sub>2</sub>Cl<sub>2</sub> (0.1 mol/L) at 0 °C. The mixture was stirred at 0 °C for about 1 h. The volatiles were removed under reduced pressure. The residue was purified by column chromatography on silica gel (elution Et<sub>2</sub>O/Hexane and 0.10% triethylamine).



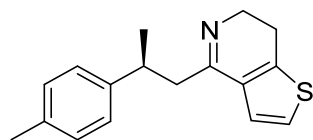

**(S)-4-(2-(*p*-Tolyl)propyl)-6,7-dihydrothieno[3,2-*c*]pyridine (4b)**

Following **GP-2**, **4b** was synthesized from **3aa**.  $[\alpha]_D^{25} +45.0$  (*c* 0.5, CHCl<sub>3</sub>). IR (film): 2983, 2936, 1651, 1567, 1541, 1468, 1450, 1380, 1351, 1261, 1178, 1154, 771, 596, 530 cm<sup>-1</sup>. <sup>1</sup>H NMR (400 MHz, CDCl<sub>3</sub>) δ 7.09 (dd, *J* = 8.4, 2.7 Hz, 4H), 7.06 (s, 2H), 3.90 – 3.62 (m, 2H), 3.30 – 3.12 (m, 1H), 2.91 (dd, *J* = 13.8, 5.5 Hz, 1H), 2.81 – 2.67 (m, 3H), 2.31 (s, 3H), 1.27 (d, *J* = 6.9 Hz, 3H). <sup>13</sup>C NMR (101 MHz, CDCl<sub>3</sub>) δ 163.1, 143.8, 143.3, 135.6, 131.7, 129.0, 126.7, 124.0, 121.9, 47.5, 45.9, 37.3, 22.2, 21.2, 21.0. HRMS calcd for [C<sub>17</sub>H<sub>19</sub>NSH]<sup>+</sup> (*M*+H<sup>+</sup>): 270.1311, found 270.1311. The *ee* was determined via HPLC on a Chiralcel OD-H column (5.0% 2-PrOH in hexanes, 1.0 mL/min); *t*<sub>R</sub>: 6.8 min (major), 7.0 min (minor). The enantiomeric excess was determined to be 90%.

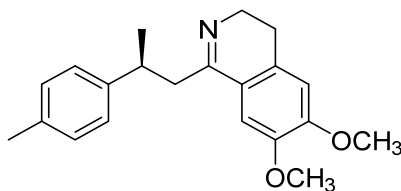

**(S)-6,7-Dimethoxy-1-(2-(*p*-tolyl)propyl)-3,4-dihydroisoquinoline (4c)**

Following **GP-2**, **4c** was synthesized from **3ab**. Yellow oil. Yield: 92% (43 mg, 0.15 mmol).  $[\alpha]_D^{25} +32.7$  (*c* 1.0, CHCl<sub>3</sub>). IR (film): 3000, 2935, 2930, 2835, 1622, 1605, 1570, 1514, 1464, 1405, 1358, 1319, 1268, 1229, 1213, 1147, 1115, 1098, 1069, 1035, 963, 860, 815, 545 cm<sup>-1</sup>. <sup>1</sup>H NMR (400 MHz, CDCl<sub>3</sub>) δ 7.17 – 7.05 (m, 4H), 6.91 (s, 1H), 6.69 (s, 1H), 3.91 (s, 3H), 3.85 (s, 3H), 3.72 – 3.61 (m, 1H), 3.61 – 3.51 (m, 1H), 3.30 – 3.13 (m, 1H), 3.02 (dd, *J* = 14.0, 5.5 Hz, 1H), 2.81 (dd, *J* = 14.0, 9.1 Hz, 1H), 2.65 – 2.47 (m, 2H), 2.31 (s, 3H), 1.28 (d, *J* = 6.9 Hz, 3H). <sup>13</sup>C NMR (101 MHz, CDCl<sub>3</sub>) δ 165.7, 150.6, 147.4, 144.0, 135.5, 131.7, 129.1, 126.7, 122.0, 110.3, 109.0, 56.2, 55.9, 46.9, 44.8, 37.6, 25.9, 21.2, 20.9. HRMS calcd for [C<sub>21</sub>H<sub>25</sub>NO<sub>2</sub>Na]<sup>+</sup> (*M*+Na<sup>+</sup>): 346.1778, found: 346.1783. The *ee* was determined by HPLC on a Chiralcel AD-H column (20.0% 2-PrOH in hexanes, 1.0 mL/min); *t*<sub>R</sub> = 5.4 min (major), 7.1 min (minor). The enantiomeric excess was determined to be 98%.

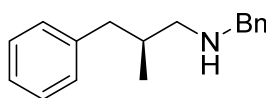

**(S)-N-Benzyl-2-methyl-3-phenylpropan-1-amine (4d)**

To a solution of secondary amide **3c** (0.32 mmol, 1.0 equiv) and  $[\text{Ir}(\text{COE})_2\text{Cl}]_2$  (1.6  $\mu\text{mol}$ , 0.5 mol%) in  $\text{CH}_2\text{Cl}_2$  (1.6 mL, 0.2 mol/L) was added  $\text{Et}_2\text{SiH}_2$  (0.63 mmol, 4.0 equiv). The solution was stirred at room temperature for 1-2 h until completion of the reaction as indicated by TLC analysis.  $\text{CH}_2\text{Cl}_2$  was removed and the resulting residue was purified by flash chromatography on silica gel eluting with petroleum ether/ $\text{Et}_2\text{O}$ /triethylamine (10/1/0.001, v/v/v) mixture to amine **4d** (61 mg, 0.32 mmol, yield: 81%) as a pale yellow oil.  $[\alpha]_D^{20} +13.9$  ( $c$  1.0,  $\text{CHCl}_3$ ). IR (film): 3331, 3084, 3062, 3026, 2954, 2923, 1675, 1603, 1495, 1453, 1377, 1308, 1188, 1119, 1029, 970, 739, 699  $\text{cm}^{-1}$ .  $^1\text{H}$  NMR (500 MHz,  $\text{CDCl}_3$ )  $\delta$  7.35 – 7.26 (m, 4H), 7.26 – 7.21 (m, 3H), 7.18 (d,  $J = 7.3$  Hz, 1H), 7.14 (dd,  $J = 7.3, 5.7$  Hz, 2H), 3.84 – 3.67 (m, 2H), 2.74 (dd,  $J = 13.4, 6.0$  Hz, 1H), 2.59 (dd,  $J = 11.7, 6.0$  Hz, 1H), 2.48 (dd,  $J = 11.7, 6.9$  Hz, 1H), 2.38 (dd,  $J = 13.4, 8.3$  Hz, 1H), 2.01 – 1.90 (m, 1H), 0.89 (d,  $J = 6.7$  Hz, 3H).  $^{13}\text{C}$  NMR (126 MHz,  $\text{CDCl}_3$ )  $\delta$  141.0, 140.6, 129.1, 128.3, 128.1, 128.1, 126.8, 125.7, 55.4, 54.1, 41.4, 35.4, 18.0. HRMS calcd for  $[\text{C}_{17}\text{H}_{21}\text{NH}]^+$  ( $\text{M}+\text{H}^+$ ): 240.1747, found: 240.1745. The *ee* was determined via HPLC on a Chiralcel OD-3 column (5.0% 2-PrOH in hexanes, 1.0 mL/min);  $t_R = 5.6$  min (major), 6.6 min (minor). The enantiomeric excess was determined to be 99%.

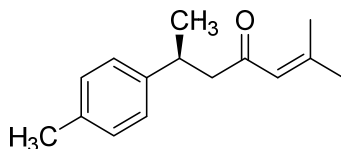

**(S)-2-Methyl-6-(p-tolyl)hept-2-en-4-one (K-1)**

$\text{Tf}_2\text{O}$  (0.22 mmol, 1.1 equiv) was added dropwise to a solution of secondary amide **3ap** (0.2 mmol, 1.0 equiv) and 2-fluoropyridine (0.24 mmol, 1.2 equiv) in  $\text{CH}_2\text{Cl}_2$  (1 mL, 0.2 mol/L, newly distilled) at 0  $^\circ\text{C}$ . After being stirred for 30 minutes, 2-methylprop-1-ene (0.3 mmol, 1.5 equiv, 2.4 M THF solution) was added portion-wise over 1 hour. The solution was allowed to warm up to room temperature and stirred for 3 hours. To the mixture were added THF (2 mL),  $\text{TsOH}\cdot\text{H}_2\text{O}$  (0.2 mmol, 1.0 equiv) and  $\text{H}_2\text{O}$  (0.1 mL), and

the resulting mixtures was refluxed overnight. After being cooled to room temperature, the mixture was extracted with CH<sub>2</sub>Cl<sub>2</sub> (3 × 5 mL). The combined organic phases were washed with an aq. Solution of Na<sub>2</sub>CO<sub>3</sub>, dried over anhydrous sodium sulfate, filtered, and concentrated under reduced pressure. The residue was purified by silica gel column chromatography eluting with hexane/ethyl acetate (30/1, v/v) mixture to an inseparable mixture of three ketones: (+)-(*S*)-*ar*-turmerone (**K-1**), (+)-(*S*)-dihydro-*ar*-turmerone (**K-2**), and non-conjugate enone **5** in 75% yield (28 mg). According to the <sup>1</sup>H NMR spectrum of the mixture, the yield of each ketone was 71%, 2% and 2%, respectively. (+)-(*S*)-Dihydro-*ar*-turmerone (**K-2**) could be removed from the mixture by repeated flash chromatographic separation.

(+)-(*S*)-*ar*-Turmerone (**K-1**): 98% *ee*, [α]<sub>D</sub><sup>20</sup> +61.9 (*c* 0.5, CHCl<sub>3</sub>) {lit.<sup>8</sup> [α]<sub>D</sub><sup>20</sup> = +61.1 (*c* 1.50, CHCl<sub>3</sub>), 98% *ee*}. IR (film): 2961, 2923, 1686, 1620, 1515, 1444, 1382, 1358, 1110, 1036, 1012, 815 cm<sup>-1</sup>. <sup>1</sup>H NMR (400 MHz, CDCl<sub>3</sub>) δ 7.10 (s, 4H), 6.02 (s, 1H), 3.29 (h, *J* = 6.9 Hz, 1H), 2.71 (dd, *J* = 15.7, 6.0 Hz, 1H), 2.61 (dd, *J* = 15.7, 8.3 Hz, 1H), 2.31 (s, 3H), 2.11 (s, 3H), 1.85 (s, 3H), 1.24 (d, *J* = 6.9 Hz, 3H). <sup>13</sup>C NMR (101 MHz, CDCl<sub>3</sub>) δ 199.9, 155.1, 143.7, 135.5, 129.1, 126.6, 124.1, 52.7, 35.3, 27.6, 22.0, 21.0, 20.7. The *ee* was determined via HPLC on a Chiralcel OJ-H column (1.0% 2-PrOH in hexane, 1.0 mL/min); *t*<sub>R</sub>: 9.5 min (major), 10.9 min (minor). The enantiomeric excess was determined to be 98%. HRMS Calcd for [C<sub>15</sub>H<sub>20</sub>ONa]<sup>+</sup> (*M*+Na<sup>+</sup>): 239.1406, found 239.1407.

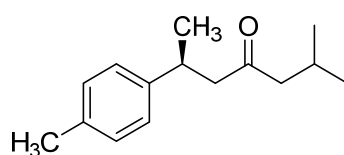

#### (*S*)-2-Methyl-6-(*p*-tolyl)heptan-4-one (**K-2**)

[α]<sub>D</sub><sup>25</sup> +25.4 (*c* 1.0, CHCl<sub>3</sub>) {lit.<sup>9</sup> [α]<sub>D</sub><sup>25</sup> +30.3 (*c* 0.5, CH<sub>2</sub>Cl<sub>2</sub>)}. IR (film): 2960, 2926, 2871, 1713, 1646, 1515, 1464, 1408, 1365, 1310, 1261, 1185, 1101, 1023, 971, 863, 804, 706 cm<sup>-1</sup>. <sup>1</sup>H NMR (500 MHz, CDCl<sub>3</sub>) δ 7.02 (s, 4H), 3.27 – 3.15 (m, 1H), 2.60 (dd, *J* = 16.2, 6.4 Hz, 1H), 2.51 (dd, *J* = 16.2, 8.0 Hz, 1H), 2.24 (s, 3H), 2.24 – 2.05 (m, 2H), 2.05 – 1.95 (m, 1H), 1.16 (d, *J* = 6.9 Hz, 3H), 0.78 (d, *J* = 4.7 Hz, 3H), 0.77 (d, *J* = 4.7 Hz, 3H). <sup>13</sup>C NMR (126 MHz, CDCl<sub>3</sub>) δ 209.9, 143.3, 135.7, 129.1, 126.6, 52.5, 51.7, 34.9, 24.4, 22.5, 22.5, 22.0, 21.0. HRMS calcd for [C<sub>15</sub>H<sub>22</sub>OH]<sup>+</sup> (*M*+H<sup>+</sup>): 219.1743, found: 219.1743.

## References

1. F. J. P. Feuillet, M. Cheeseman, M. F. Mahonb and S. D. Bull, *Org. Biomol. Chem.*, 2005, **3**, 2976.
2. (a) D. A. Evans, J. Bartroli and T. L. Shih, *J. Am. Chem. Soc.*, 1981, **103**, 2127; (b) D. A. Evans, M. D. Ennis and D. J. Mathre, *J. Am. Chem. Soc.*, 1982, **104**, 1737.
3. D. A. Evans, J. S. Tedrow, J. T. Shaw and C. W. Downey, *J. Am. Chem. Soc.*, 2002, **124**, 392.
4. Q. Zhang, J.-F. Li and J.-S. Shen, *Tetrahedron: Asymmetry*, 2012, **23**, 577.
5. (a) P. Starkov and T. D. Sheppard, *Org. Biomol. Chem.*, 2011, **9**, 1320. (b) A. Charvieux, L. L. Moigne, L. G. Borrego, N. Duguet and E. Métay, *Eur. J. Org. Chem.*, 2019, 6842.
6. (a) S. G. Davies and D. J. Dixon, *J. Chem. Soc., Perkin Trans. 1*, 2002, 1869. (b) J. M. Stevens, A. C. P. Rivera and D. D. Dixon, *J. Org. Chem.*, 2018, **83**, 14245.
7. C. Metallinos and L. Van Belle, *J. Organomet. Chem.*, 2011, **696**, 141.
8. X. Ren and Z. Lu, *Org. Lett.* 2021, **23**, 8370.
9. Q.-H. Wang, Y.-H. Xu, W.-Q. Bao, B.-L. Pa and J.-S. Hao, *Z. Naturforsch. C*, 2019, **74**, 275.
10. Y. Watanabe, T. Washio, J. Krishnamurthi, M. Anada and S. Hashimoto, *Chem. Commun.*, 2012, **48**, 6969.
11. P.-F. Yuan, J.-A. Chen, J. Zhao and Y. Huang, *Angew. Chem. Int. Ed.*, 2018, **57**, 8503.

## V. $^1\text{H}$ and $^{13}\text{C}$ NMR Spectra

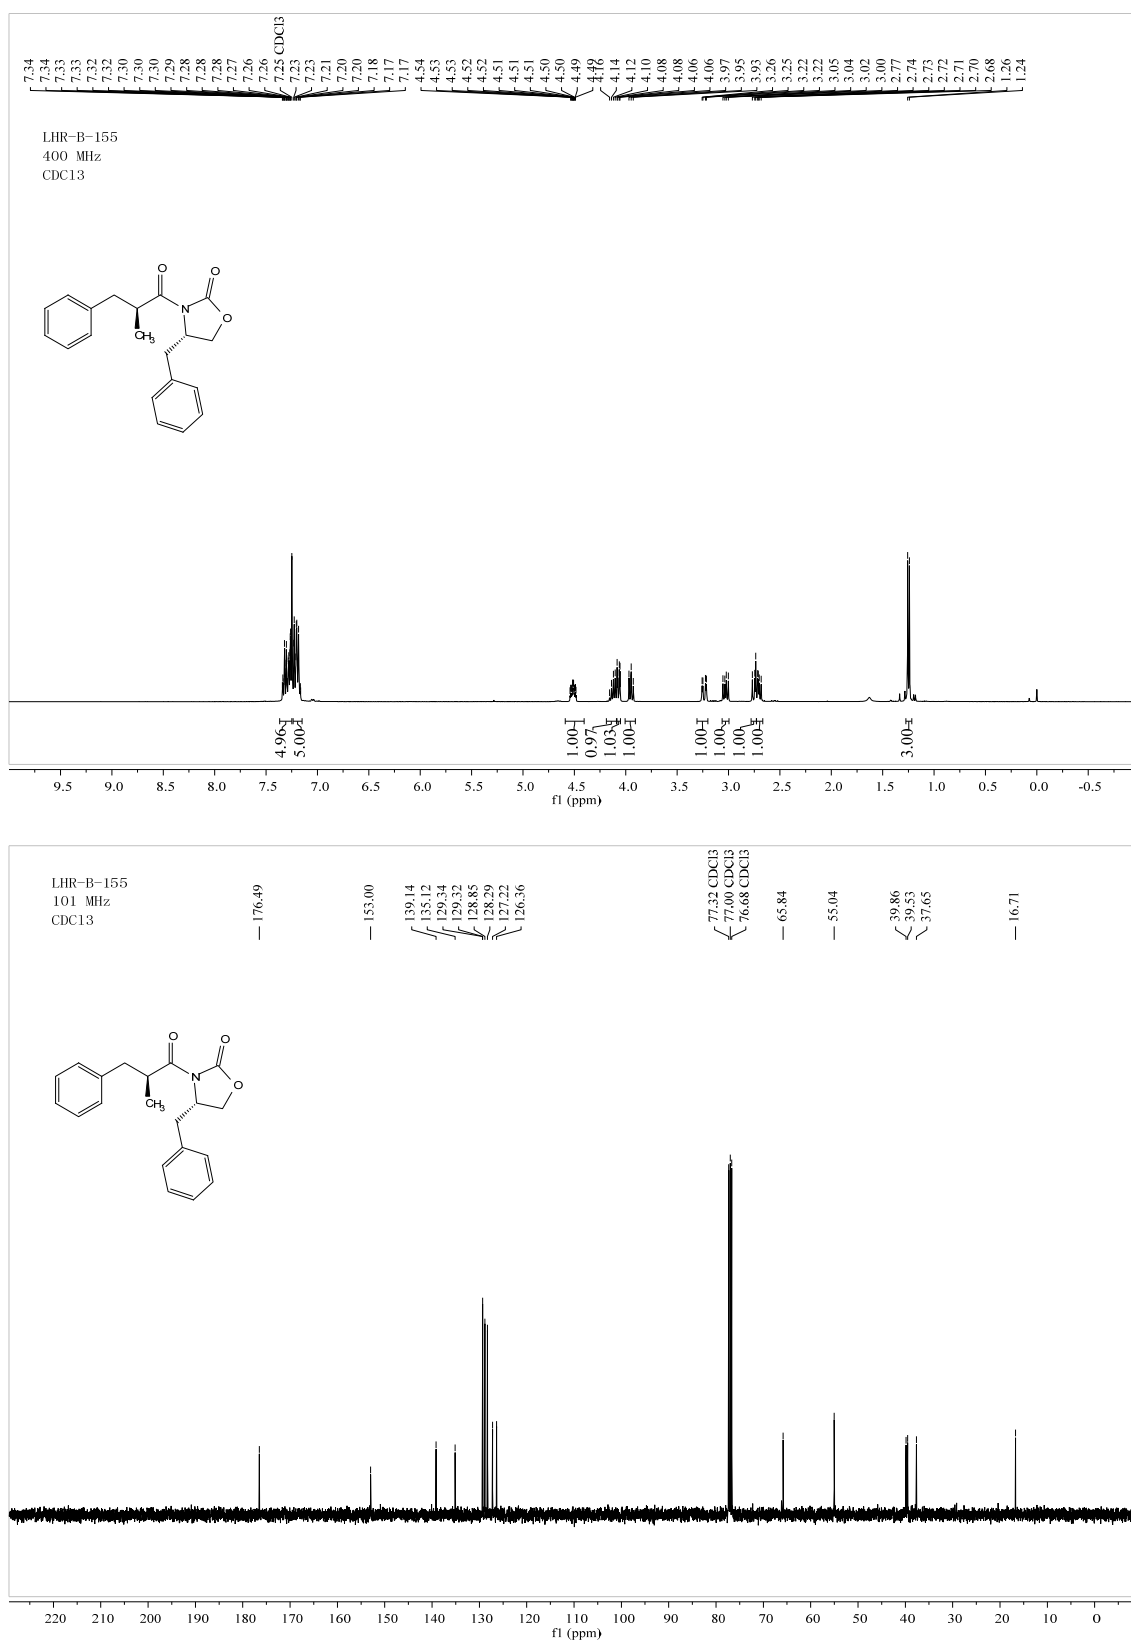

**Figure S-1.**  $^1\text{H}$  NMR (400 MHz, CDCl<sub>3</sub>) and  $^{13}\text{C}$  NMR (101 MHz, CDCl<sub>3</sub>) spectra of **2a**.

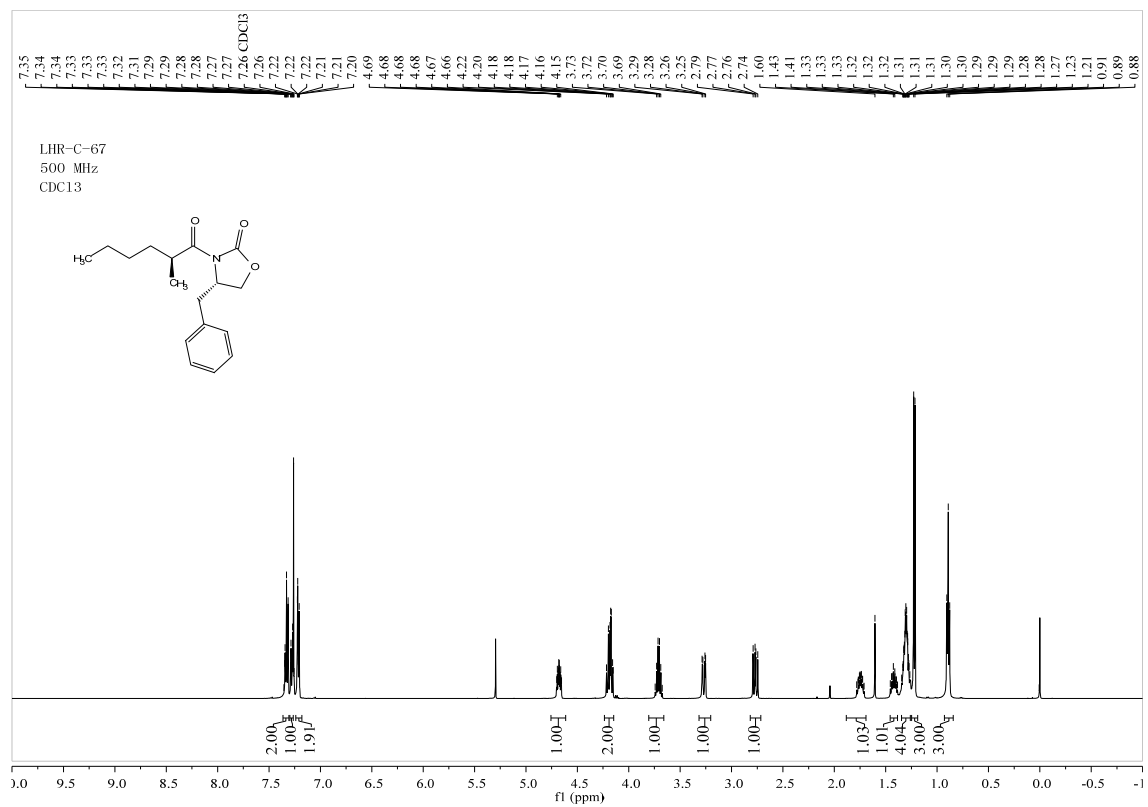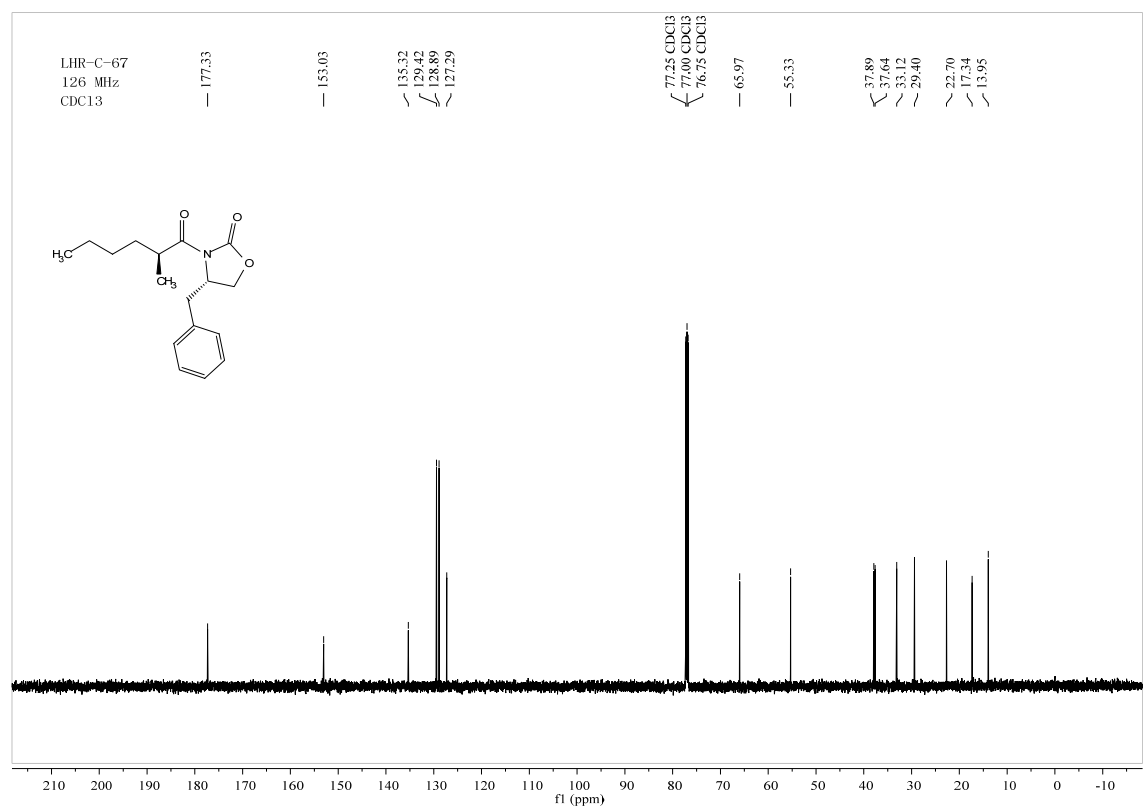

**Figure S-2.** <sup>1</sup>H NMR (500 MHz, CDCl<sub>3</sub>) and <sup>13</sup>C NMR (126 MHz, CDCl<sub>3</sub>) spectra of **2b**.

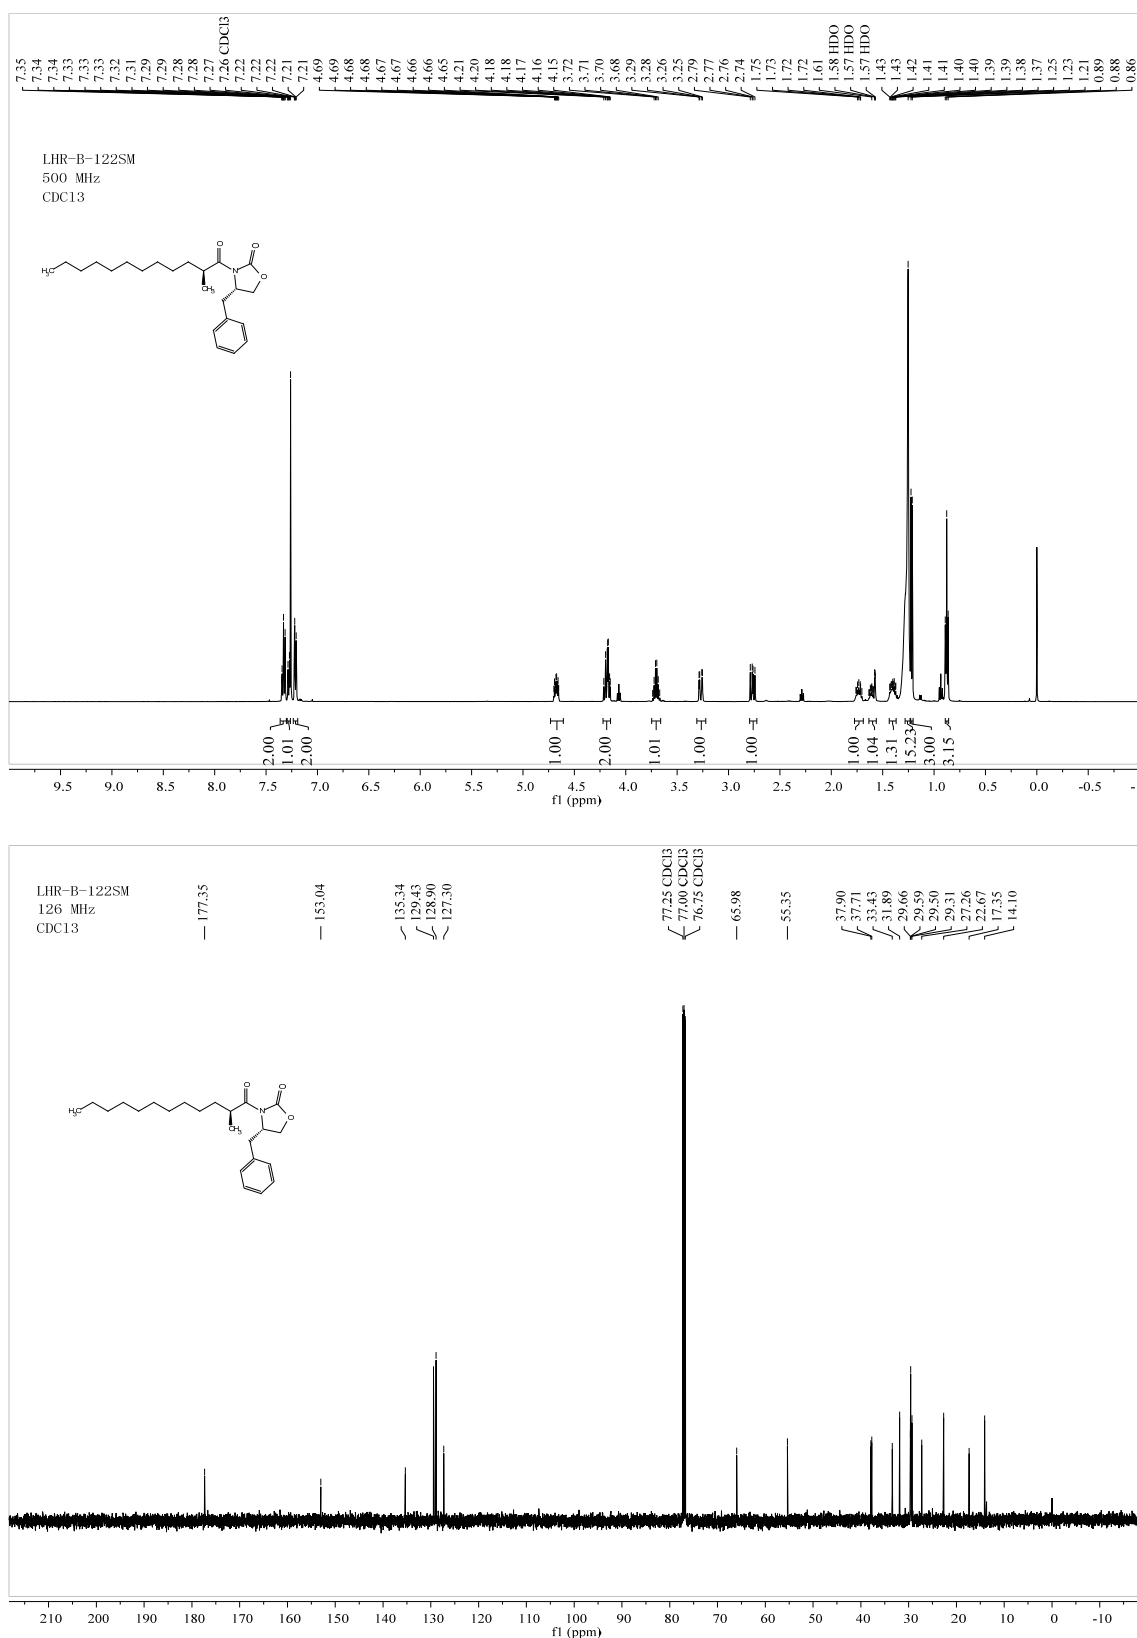

Figure S-3. <sup>1</sup>H NMR (500 MHz, CDCl<sub>3</sub>) and <sup>13</sup>C NMR (126 MHz, CDCl<sub>3</sub>) spectra of **2c**.

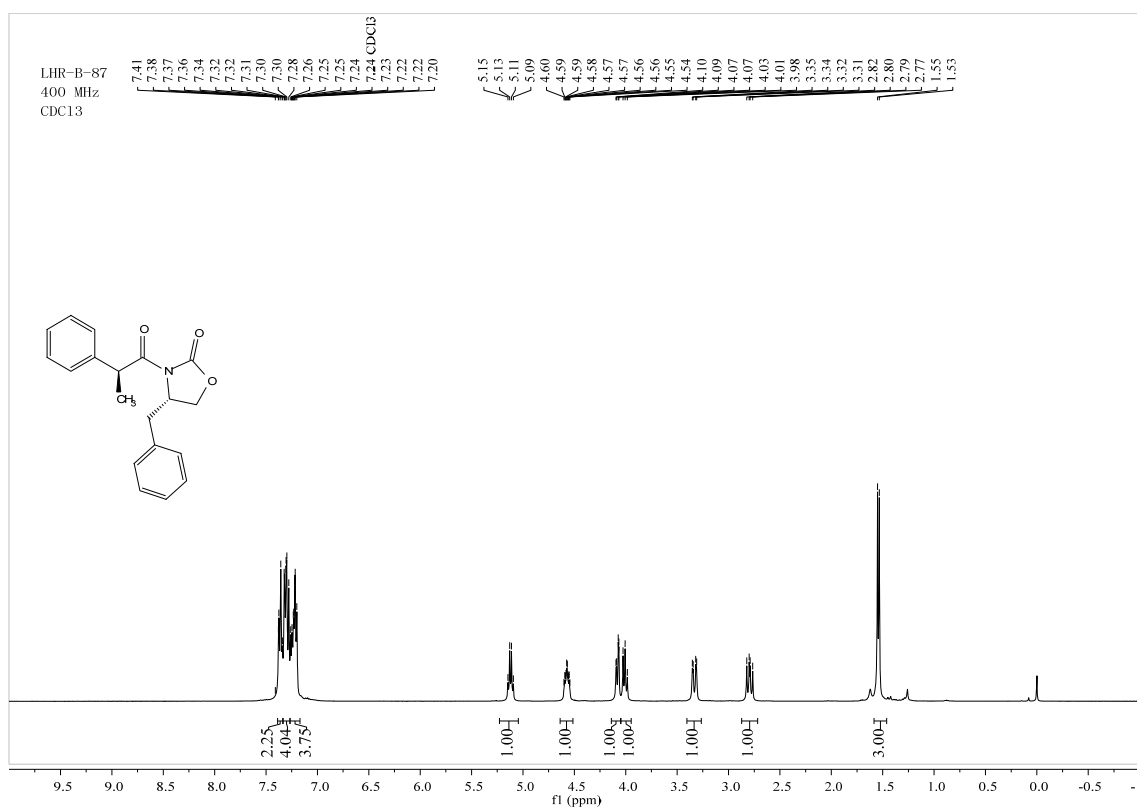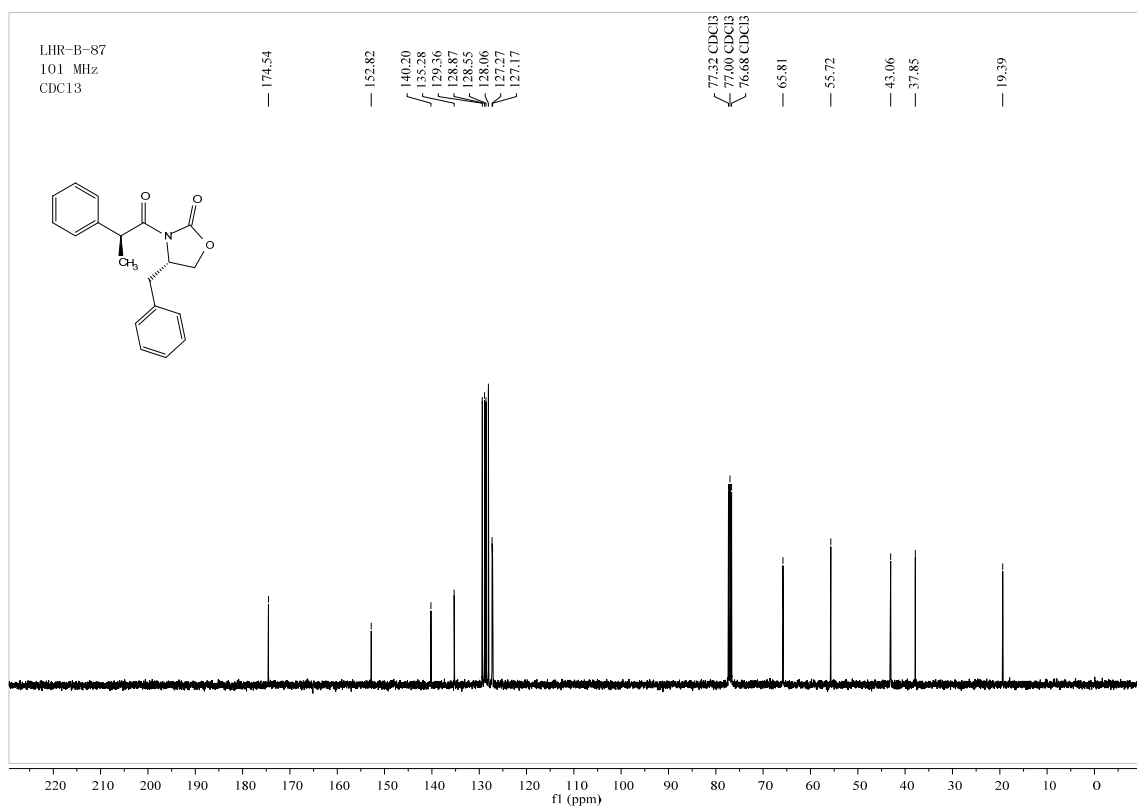

**Figure S-4.** <sup>1</sup>H NMR (400 MHz, CDCl<sub>3</sub>) and <sup>13</sup>C NMR (101 MHz, CDCl<sub>3</sub>) spectra of **2d**.



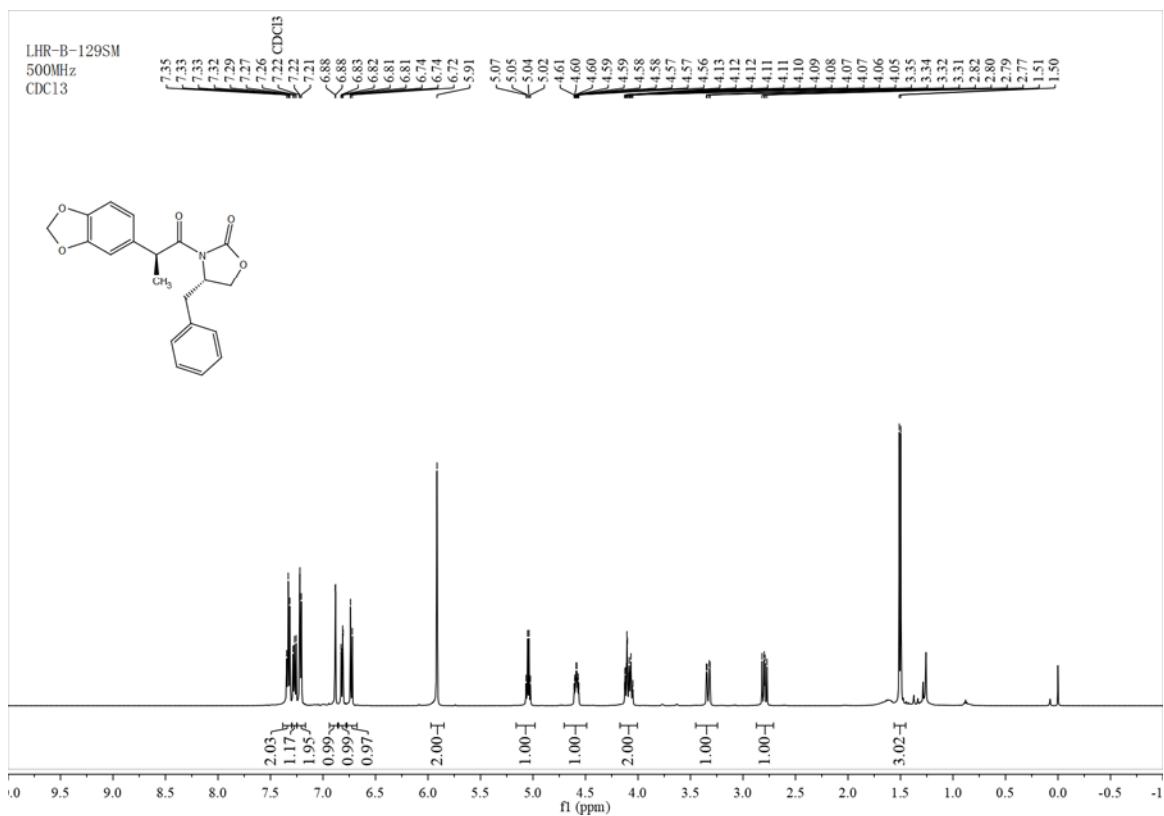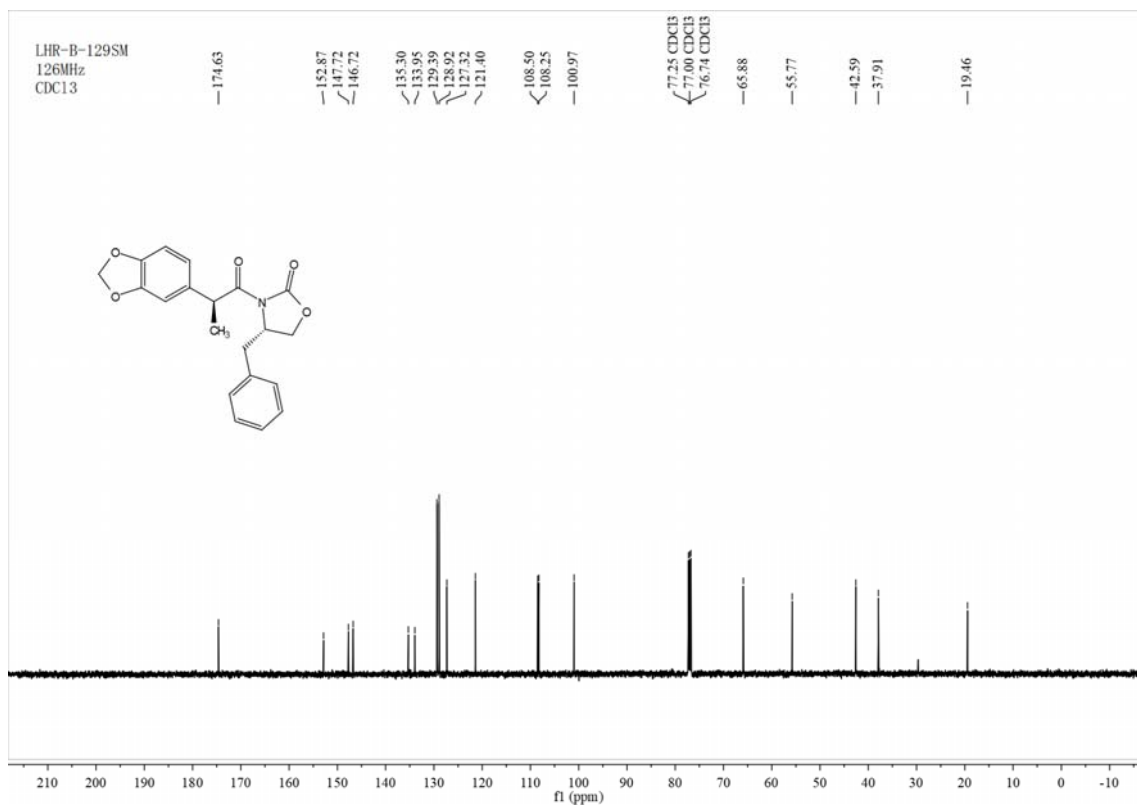

Figure S-5. <sup>1</sup>H NMR (500 MHz, CDCl<sub>3</sub>) and <sup>13</sup>C NMR (126 MHz, CDCl<sub>3</sub>) spectra of **2f**.

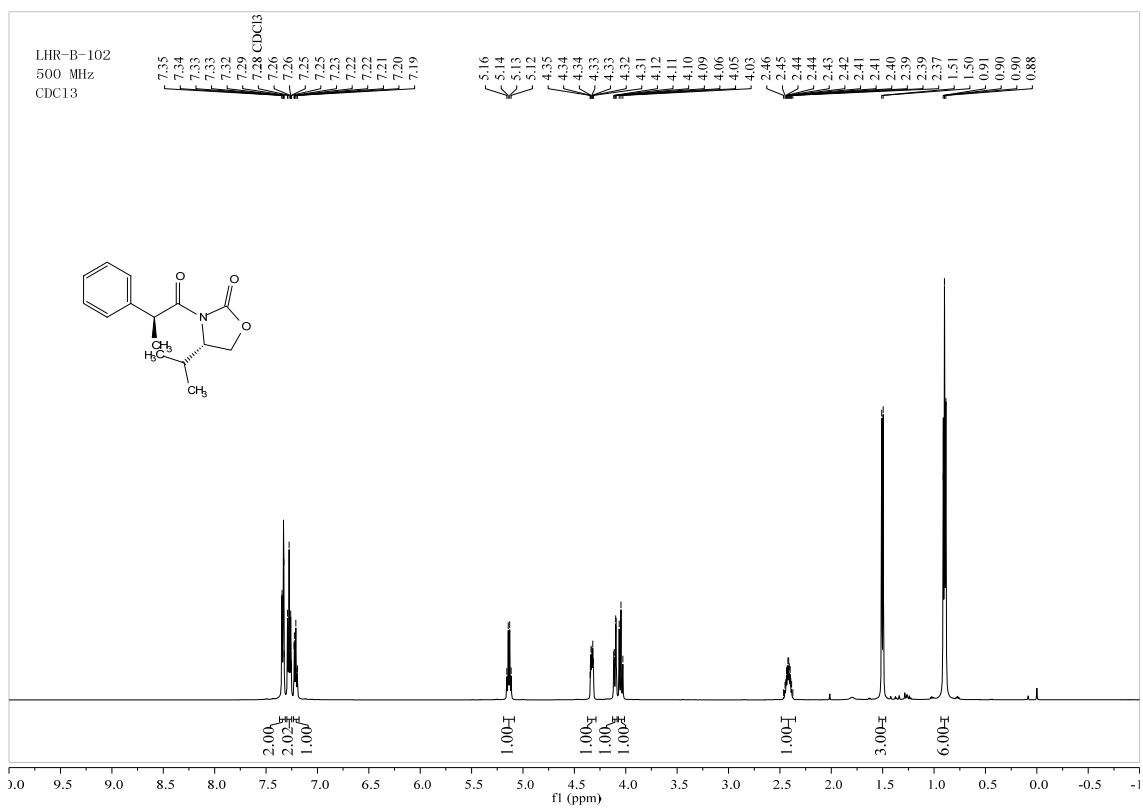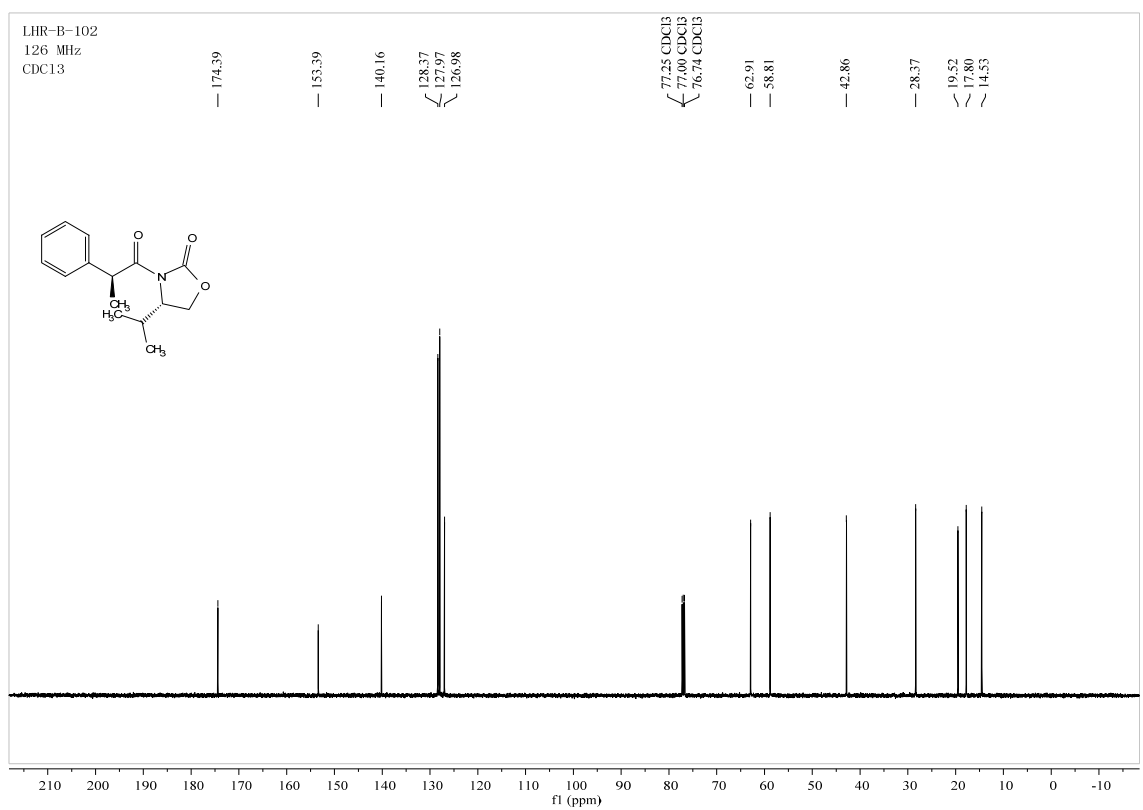

**Figure S-6.** <sup>1</sup>H NMR (500 MHz, CDCl<sub>3</sub>) and <sup>13</sup>C NMR (126 MHz, CDCl<sub>3</sub>) spectra of **2g**.

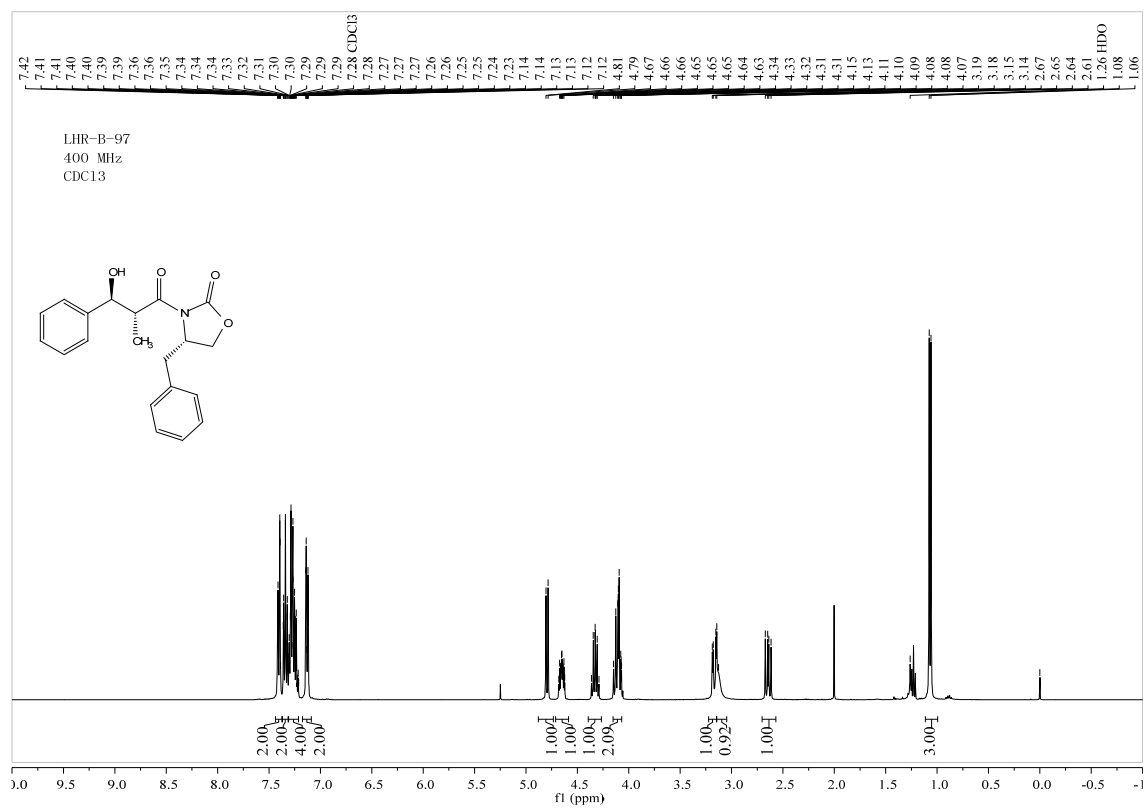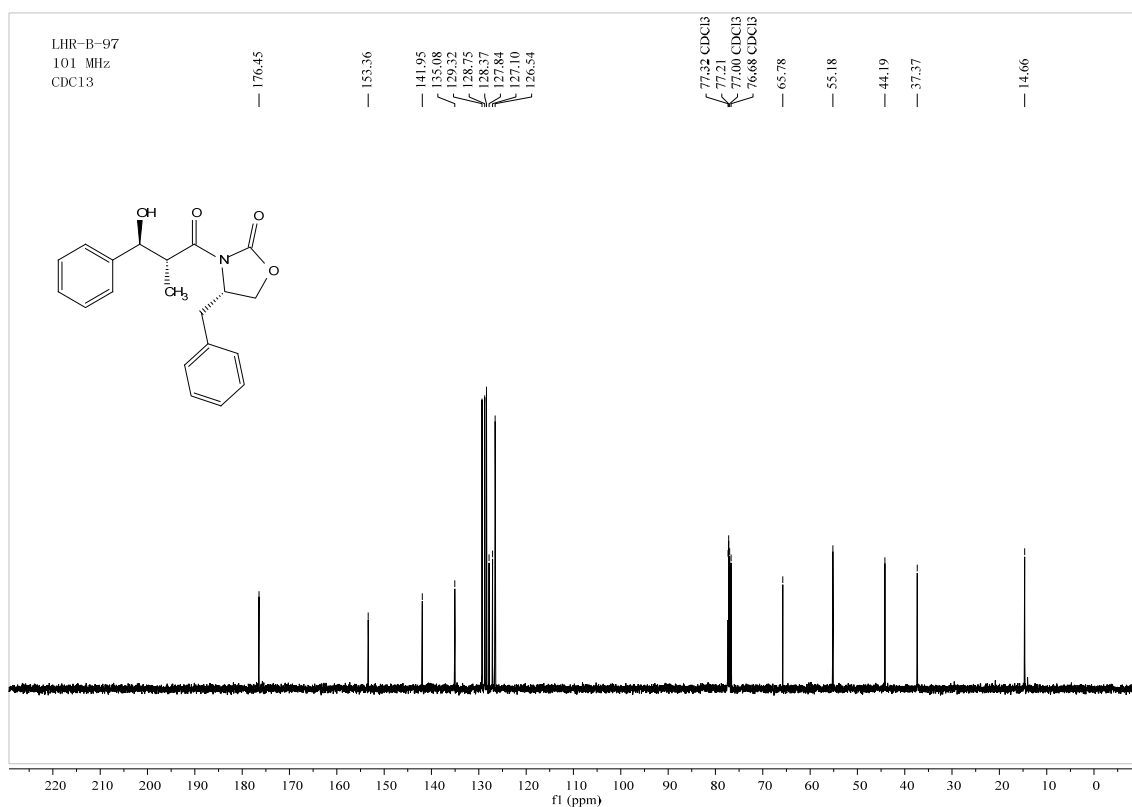

Figure S-7. <sup>1</sup>H NMR (400 MHz, CDCl<sub>3</sub>) and <sup>13</sup>C NMR (101 MHz, CDCl<sub>3</sub>) spectra of 2h.

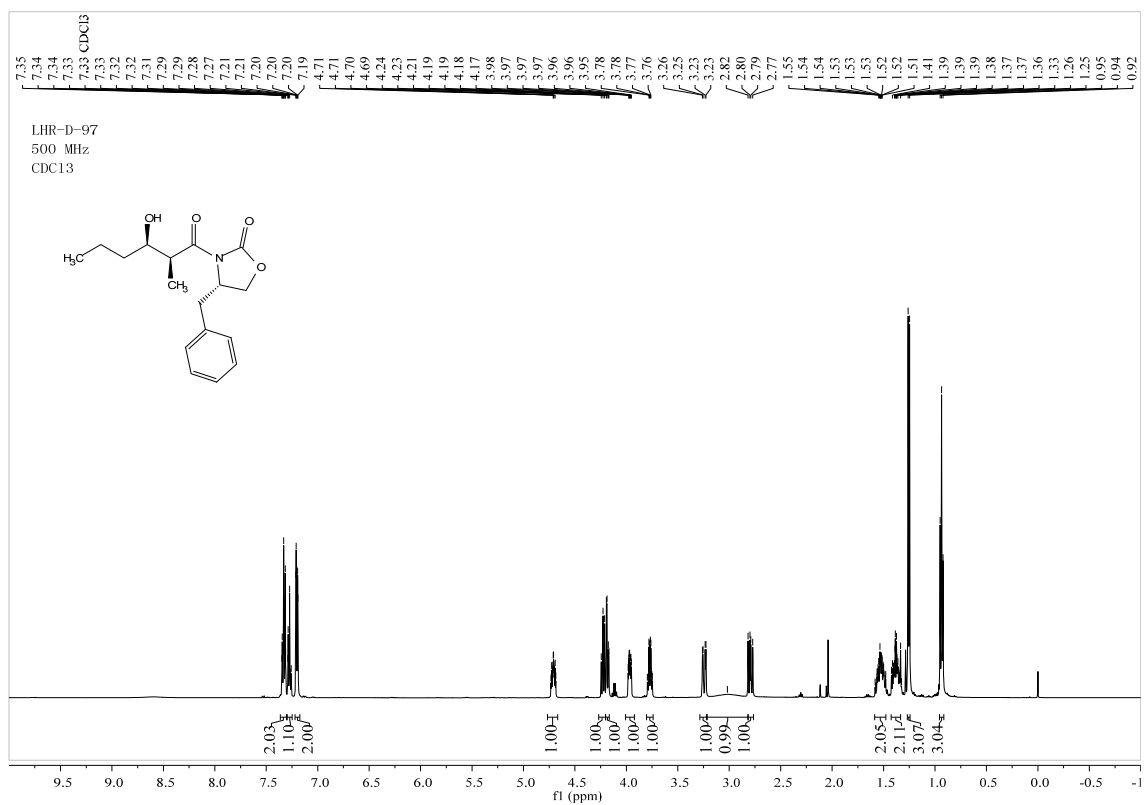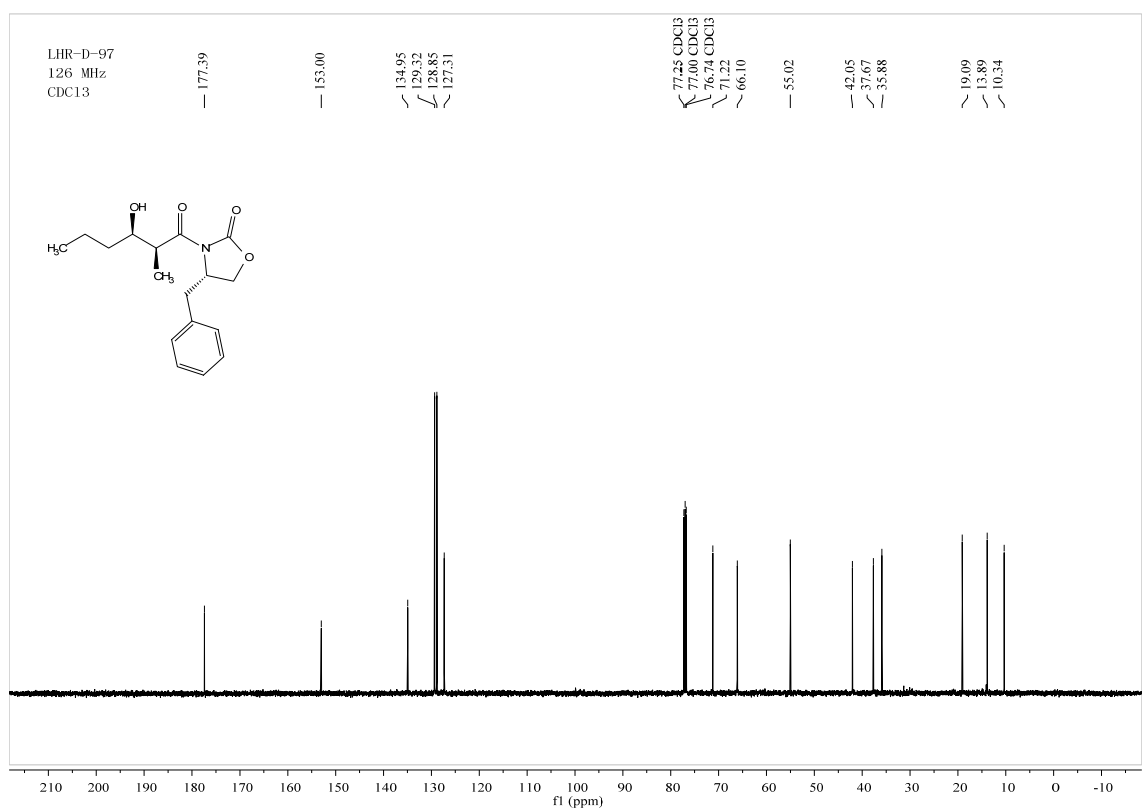

Figure S-8. <sup>1</sup>H NMR (500 MHz, CDCl<sub>3</sub>) and <sup>13</sup>C NMR (126 MHz, CDCl<sub>3</sub>) spectra of **2i**.

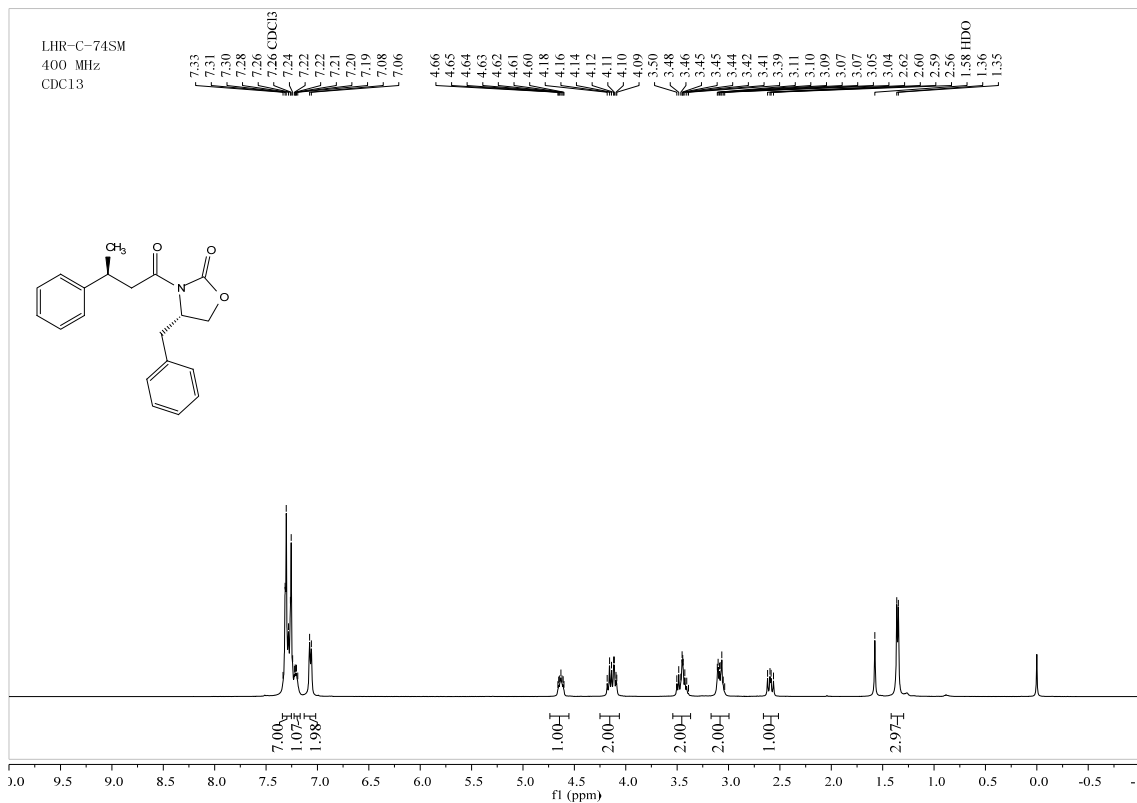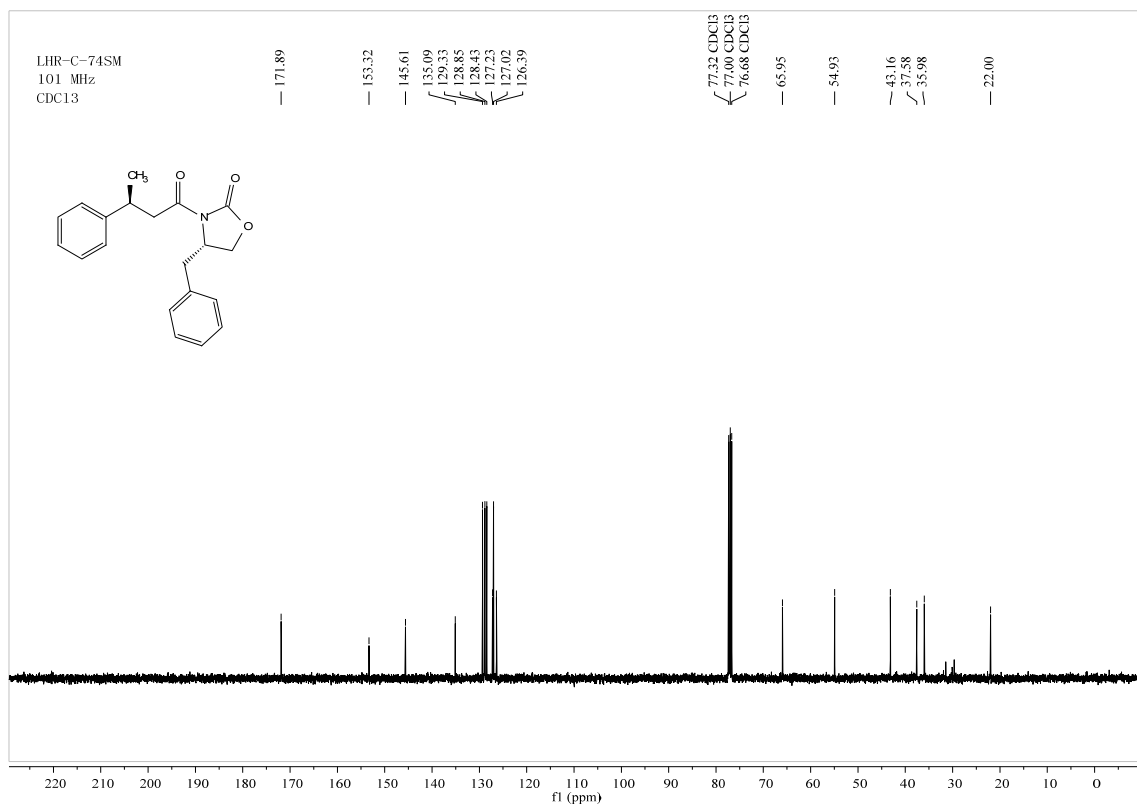

Figure S-9. <sup>1</sup>H NMR (400 MHz, CDCl<sub>3</sub>) and <sup>13</sup>C NMR (101 MHz, CDCl<sub>3</sub>) spectra of 2j.

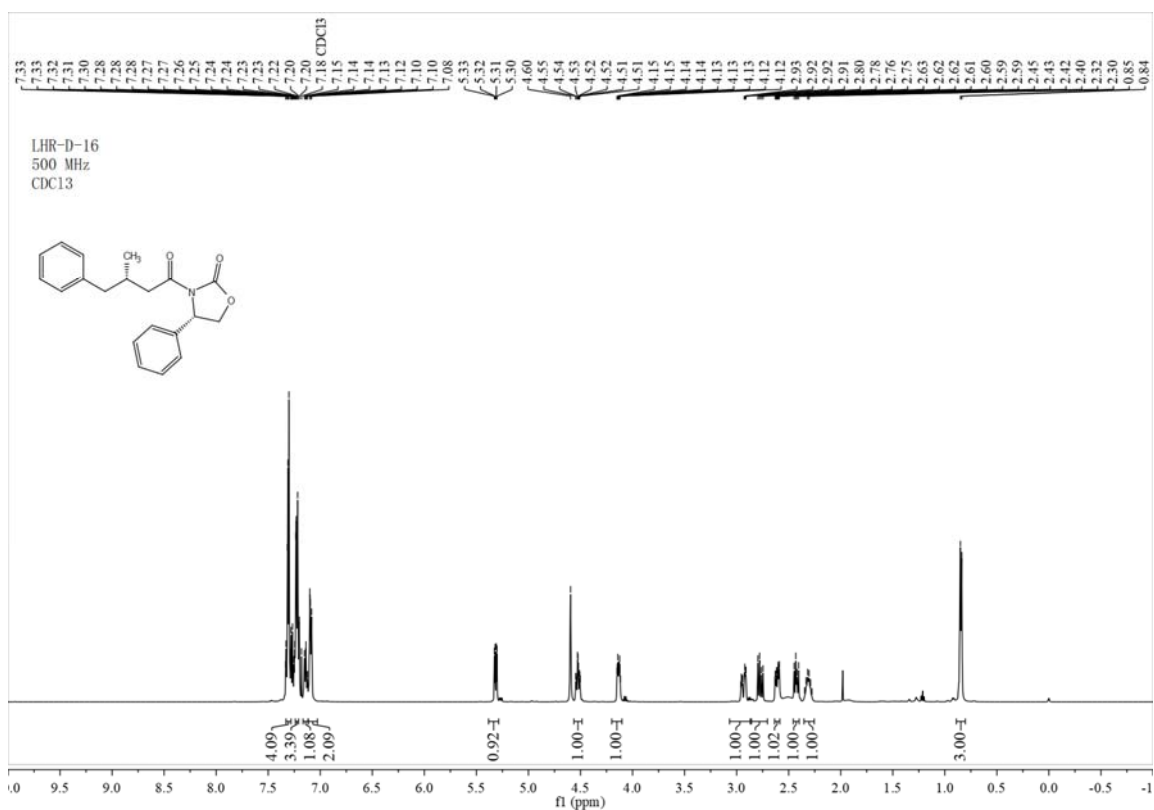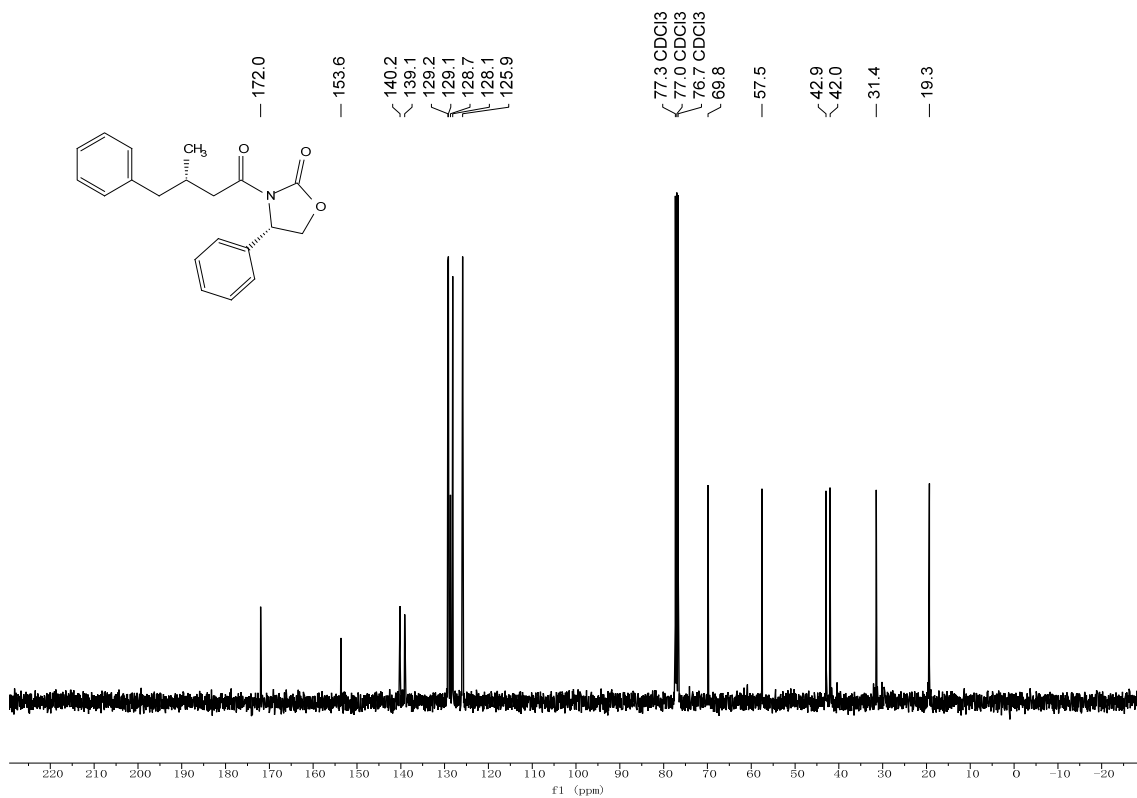

Figure S-10. <sup>1</sup>H NMR (500 MHz, CDCl<sub>3</sub>) and <sup>13</sup>C NMR (101 MHz, CDCl<sub>3</sub>) spectra of 2k.

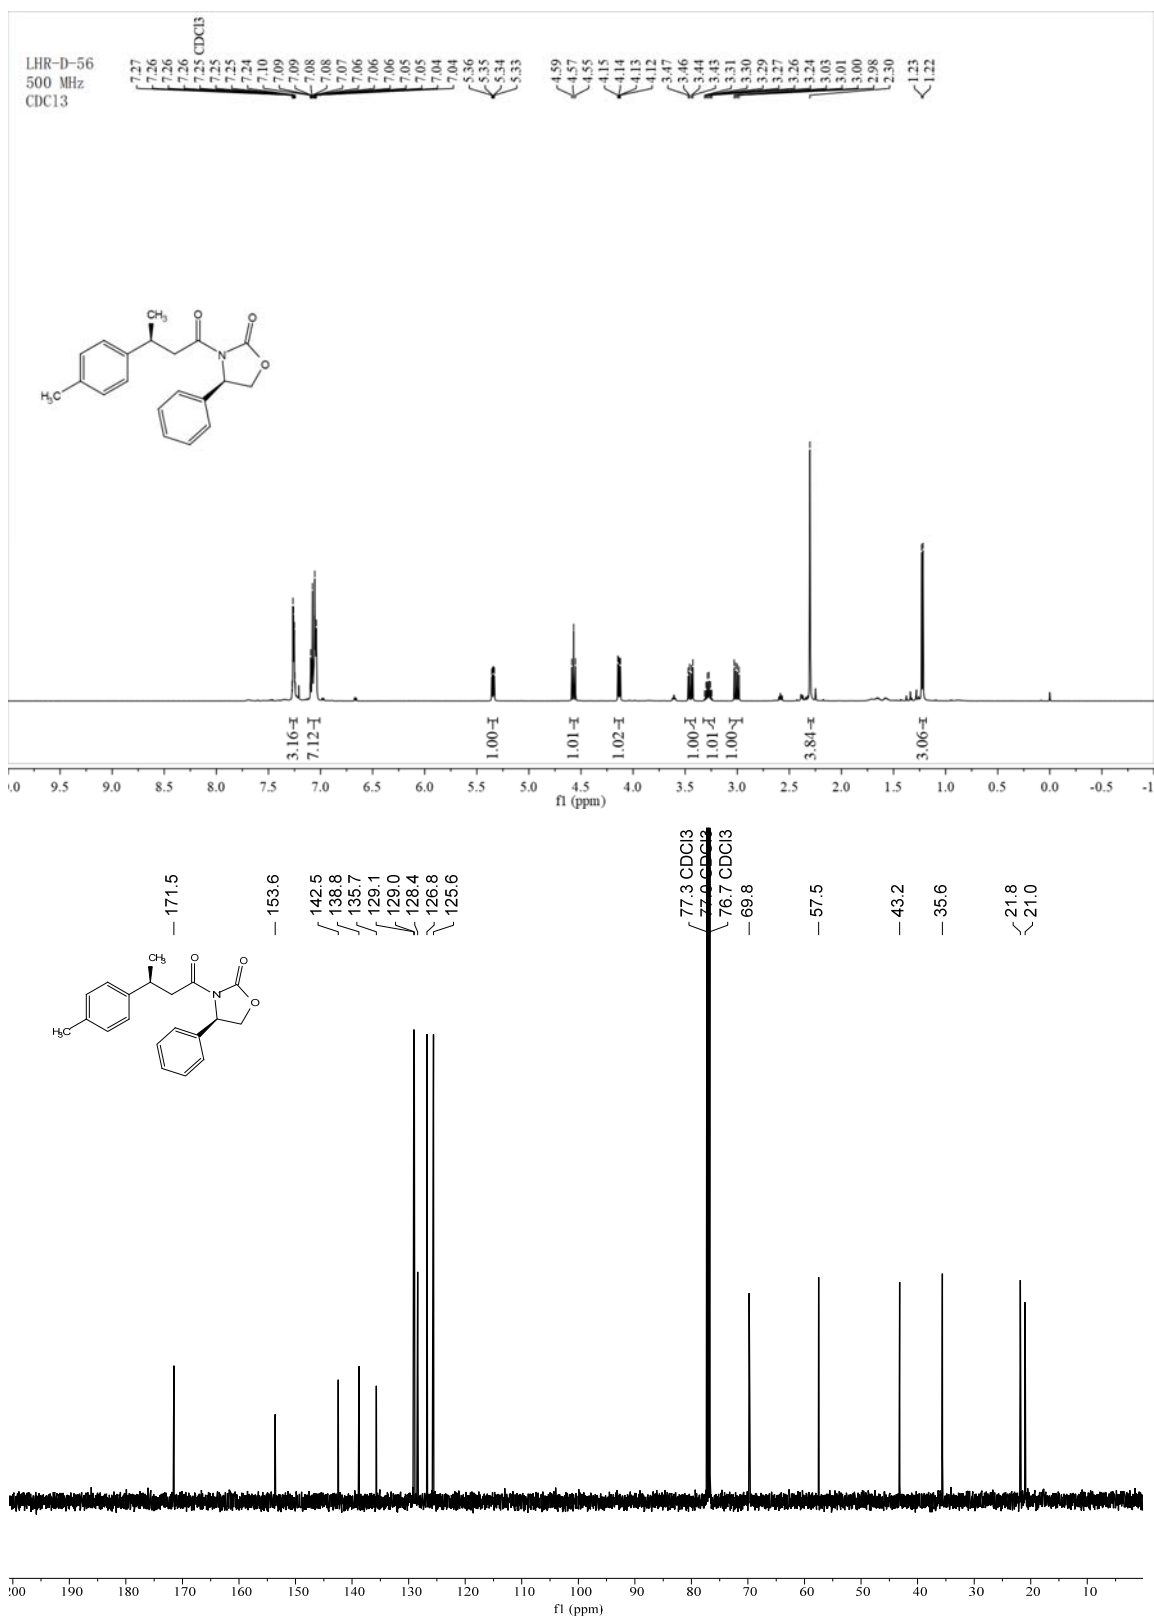

Figure S-11. <sup>1</sup>H NMR (500 MHz, CDCl<sub>3</sub>) and <sup>13</sup>C NMR (101 MHz, CDCl<sub>3</sub>) spectra of 2I.

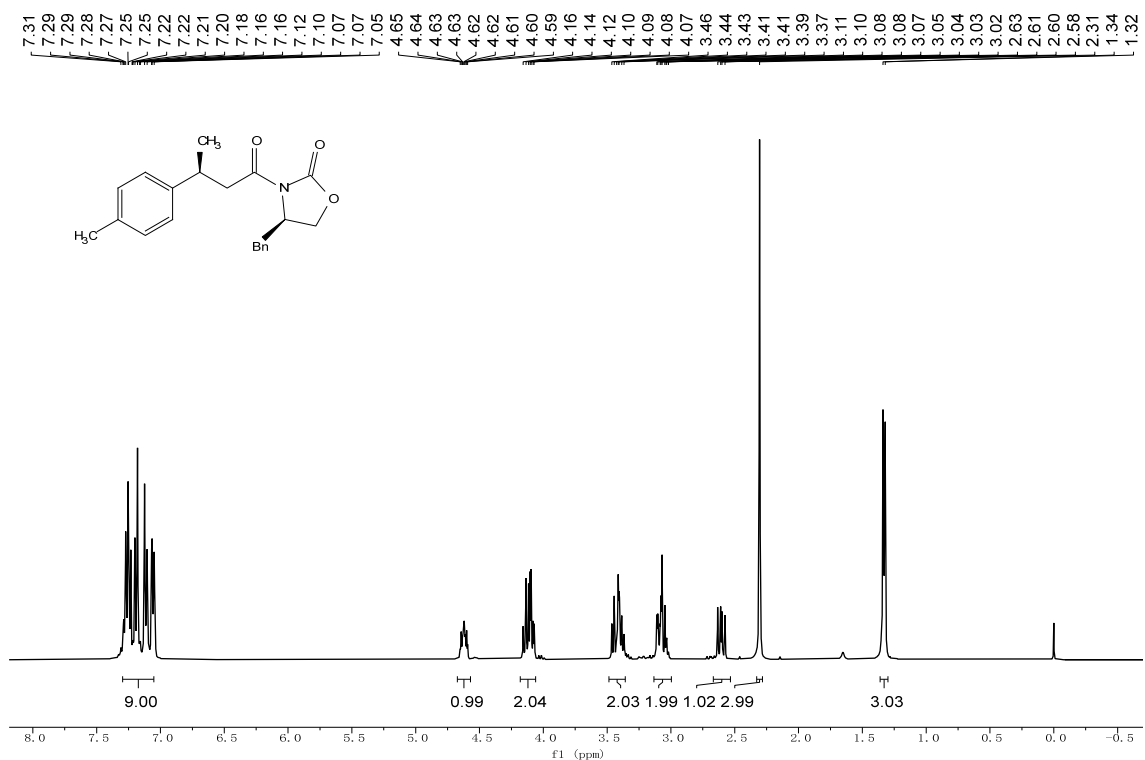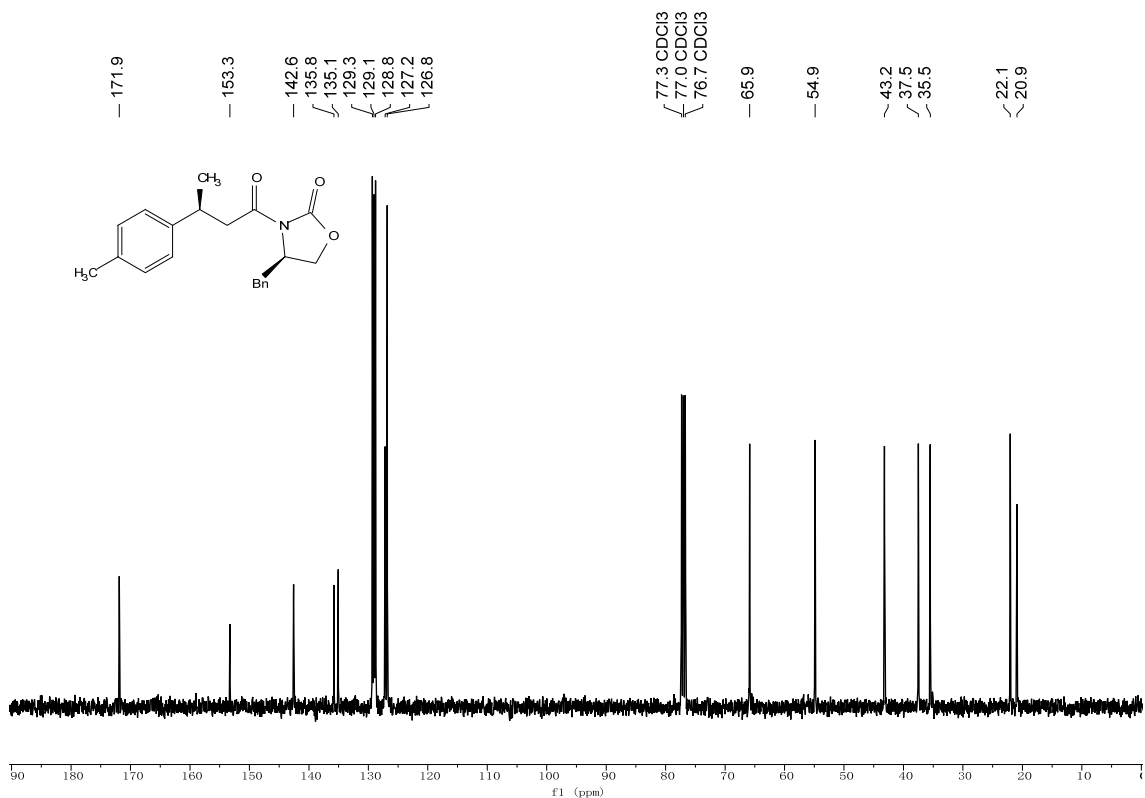

**Figure S-12.** <sup>1</sup>H NMR (400 MHz, CDCl<sub>3</sub>) and <sup>13</sup>C NMR (101 MHz, CDCl<sub>3</sub>) spectra of **2m**.



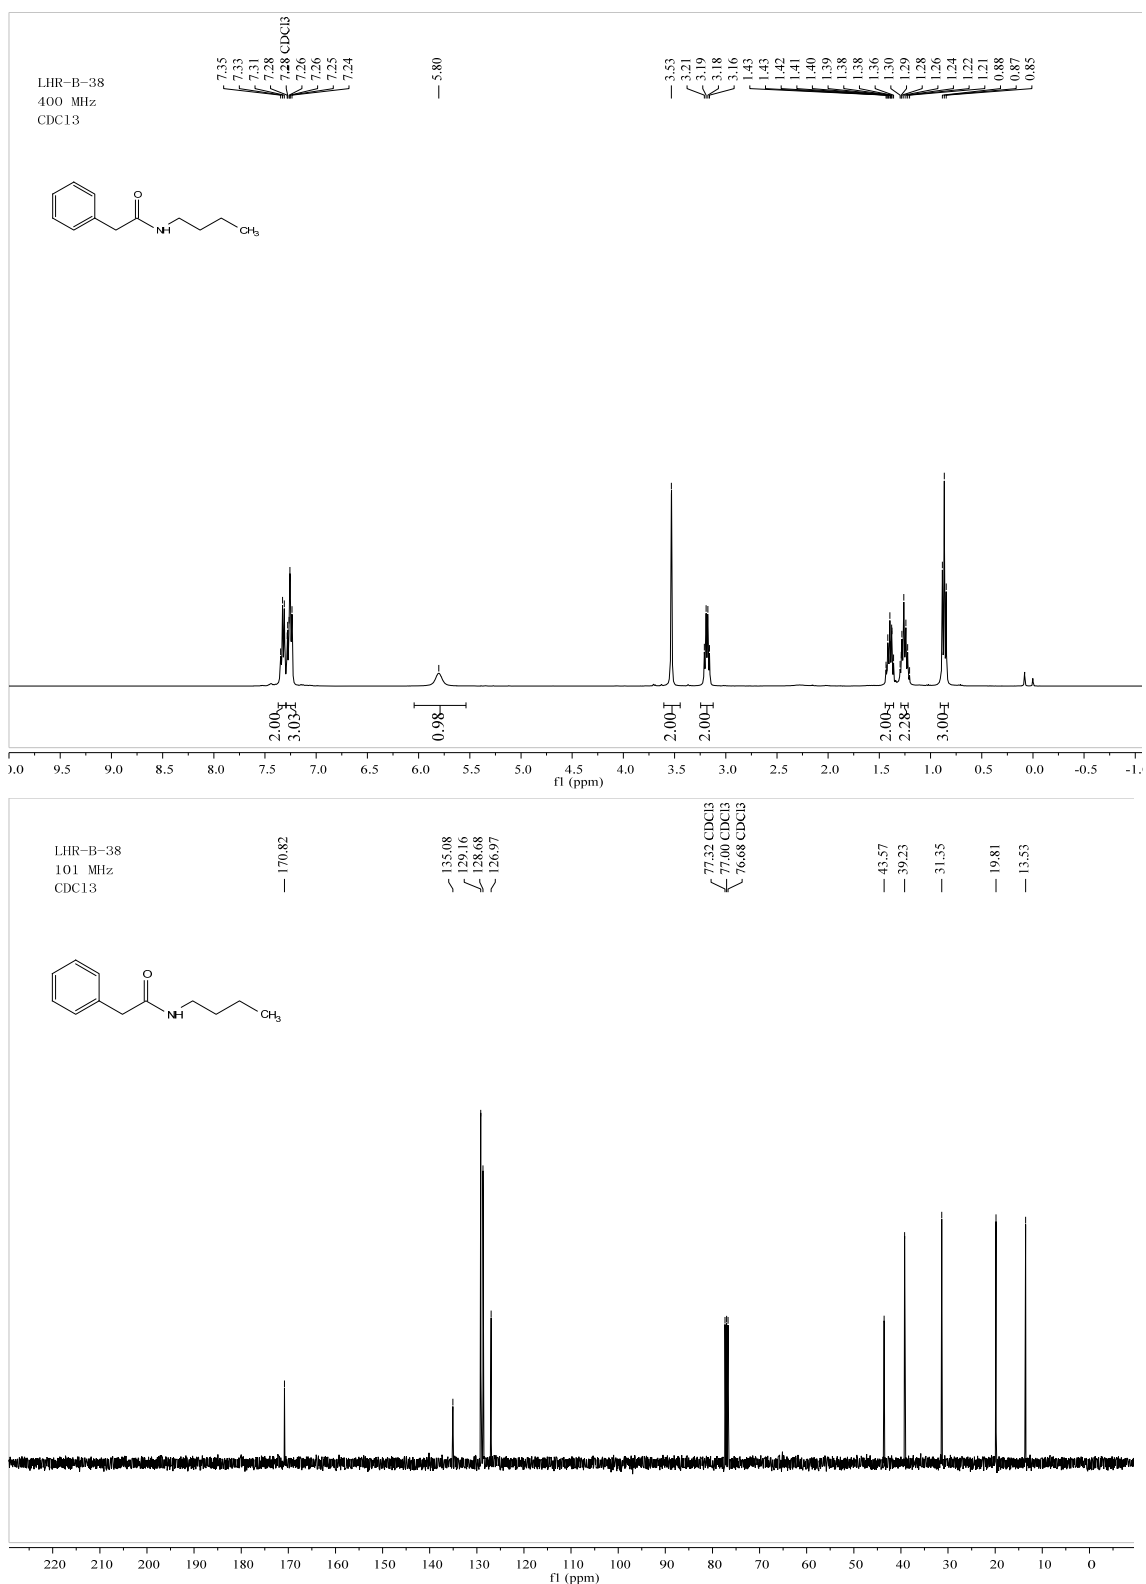

**Figure S-13.** <sup>1</sup>H NMR (400 MHz, CDCl<sub>3</sub>) and <sup>13</sup>C NMR (101 MHz, CDCl<sub>3</sub>) spectra of **3A**.

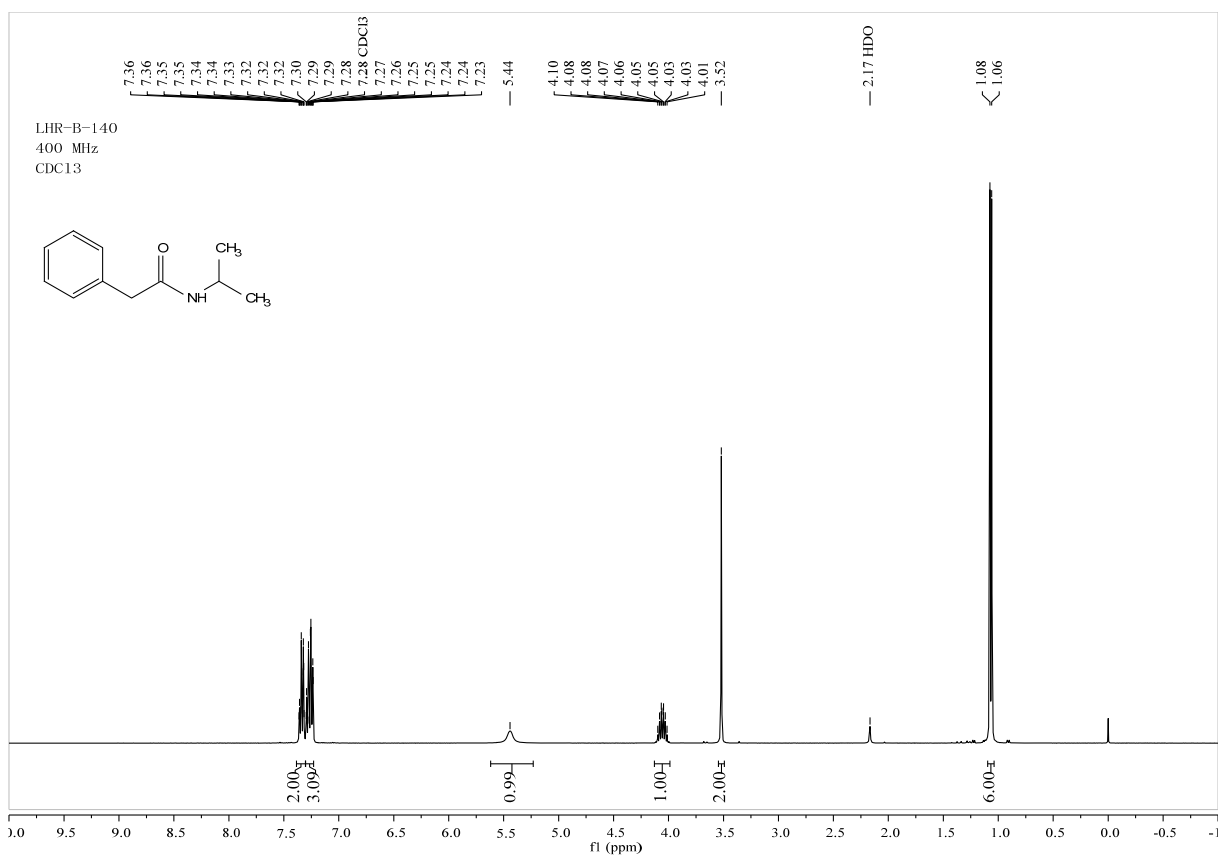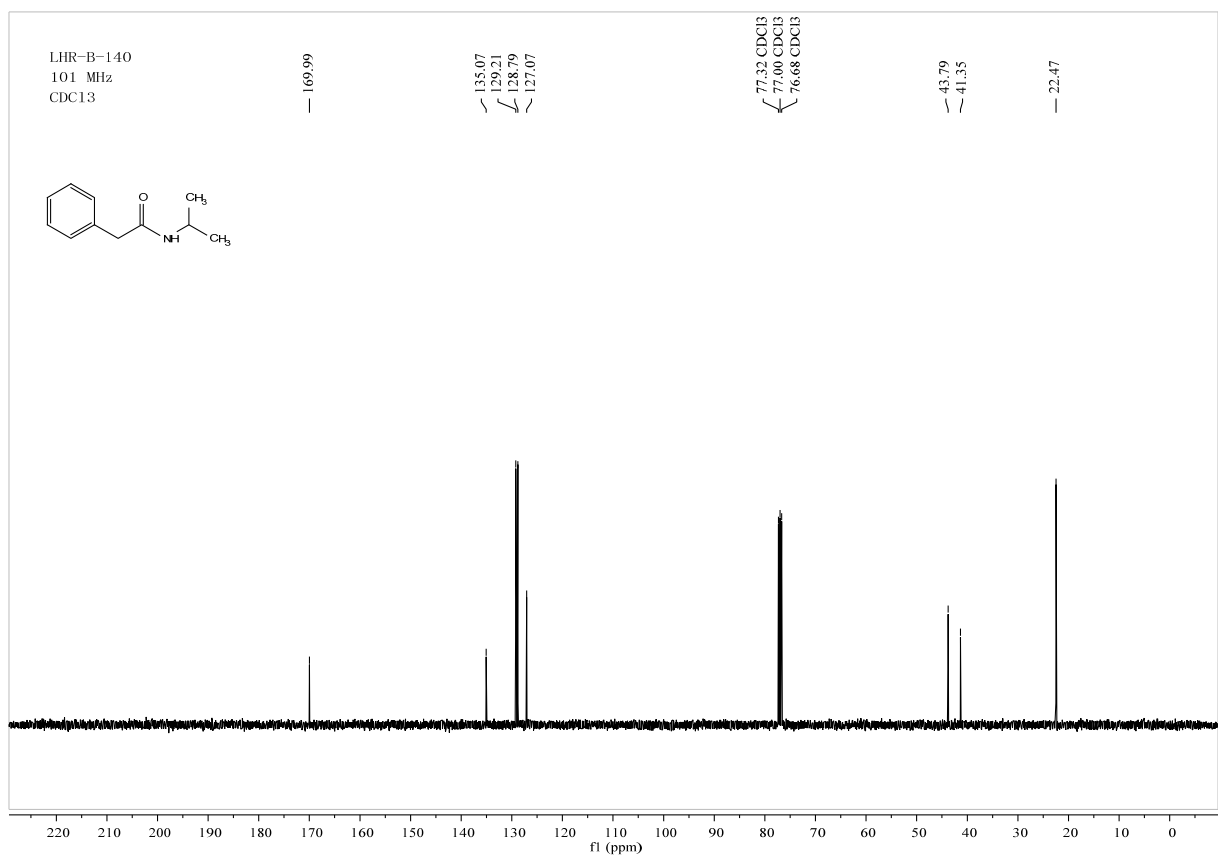

**Figure S-14.** <sup>1</sup>H NMR (400 MHz, CDCl<sub>3</sub>) and <sup>13</sup>C NMR (101 MHz, CDCl<sub>3</sub>) spectra of **3ac**.

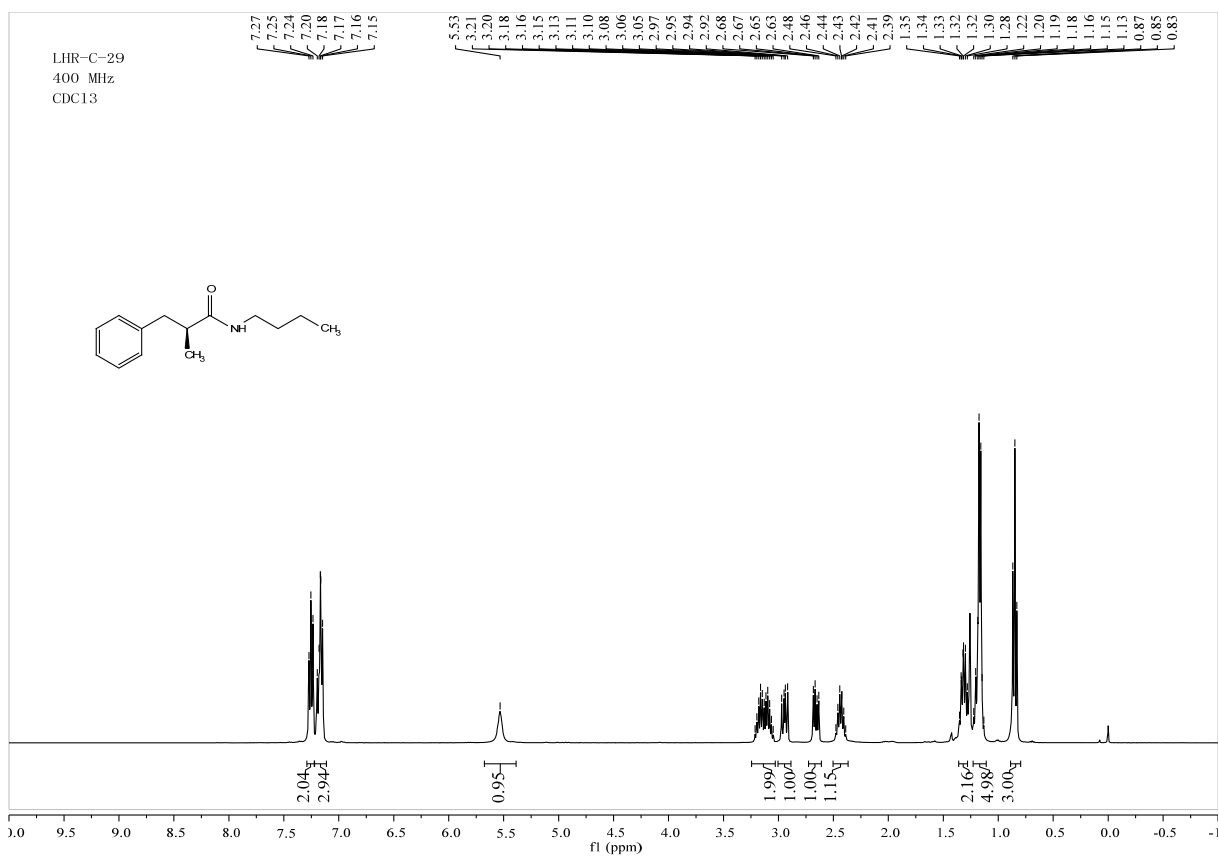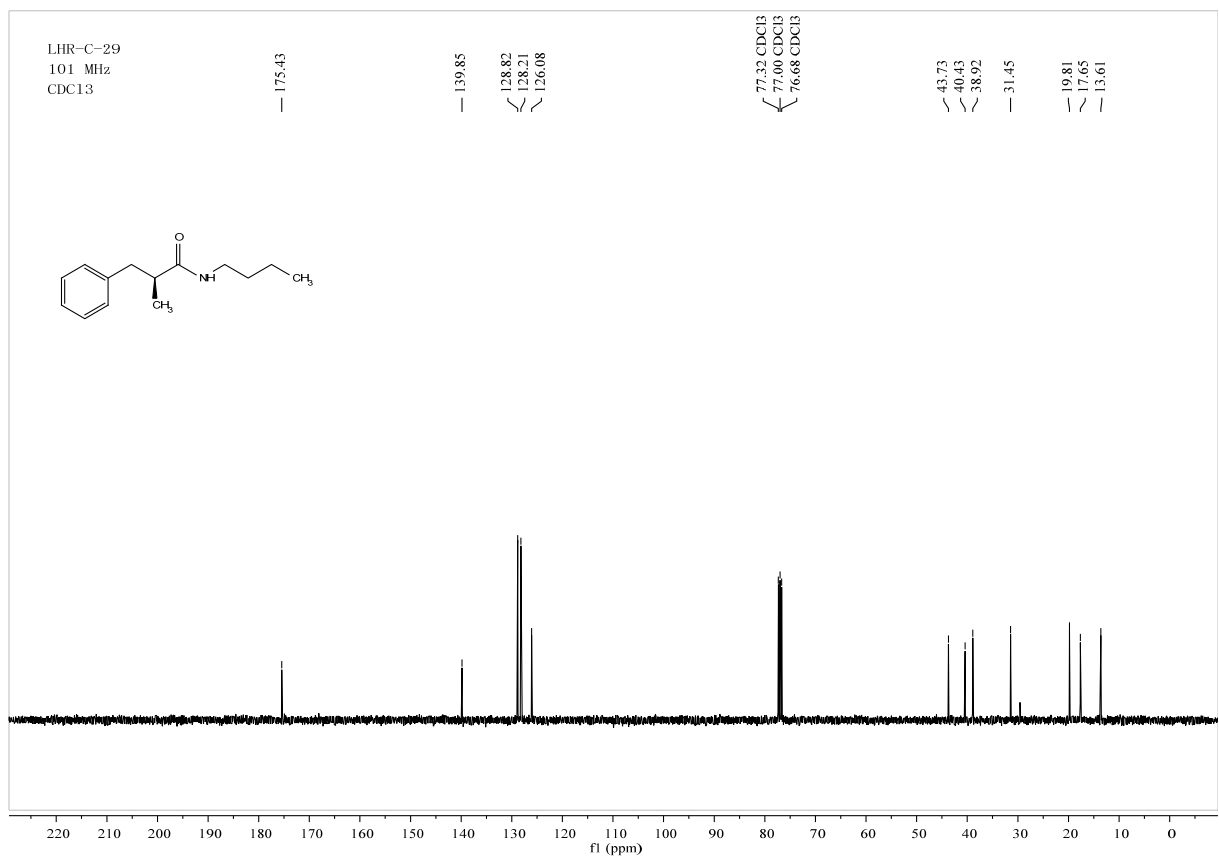

Figure S-15. <sup>1</sup>H NMR (400 MHz, CDCl<sub>3</sub>) and <sup>13</sup>C NMR (101 MHz, CDCl<sub>3</sub>) spectra of 3a.

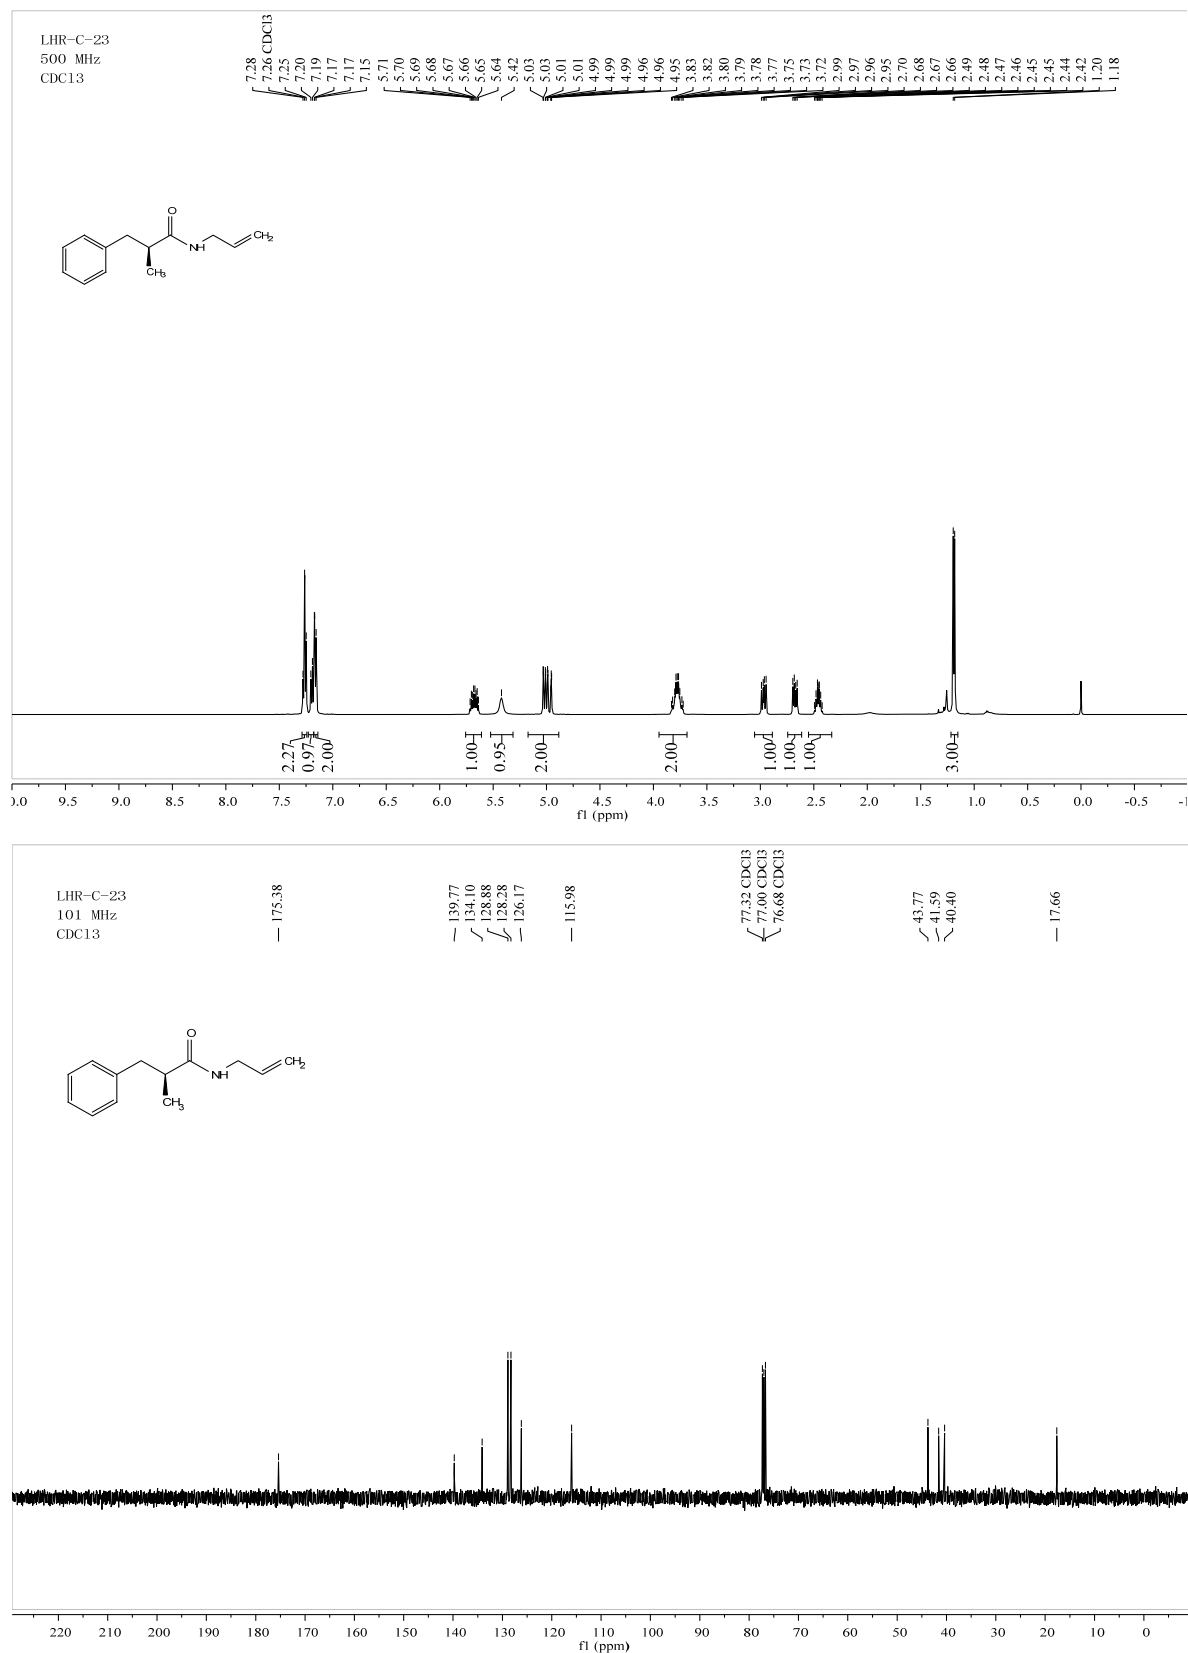

**Figure S-16.** <sup>1</sup>H NMR (500 MHz, CDCl<sub>3</sub>) and <sup>13</sup>C NMR (101 MHz, CDCl<sub>3</sub>) spectra of **3b**.

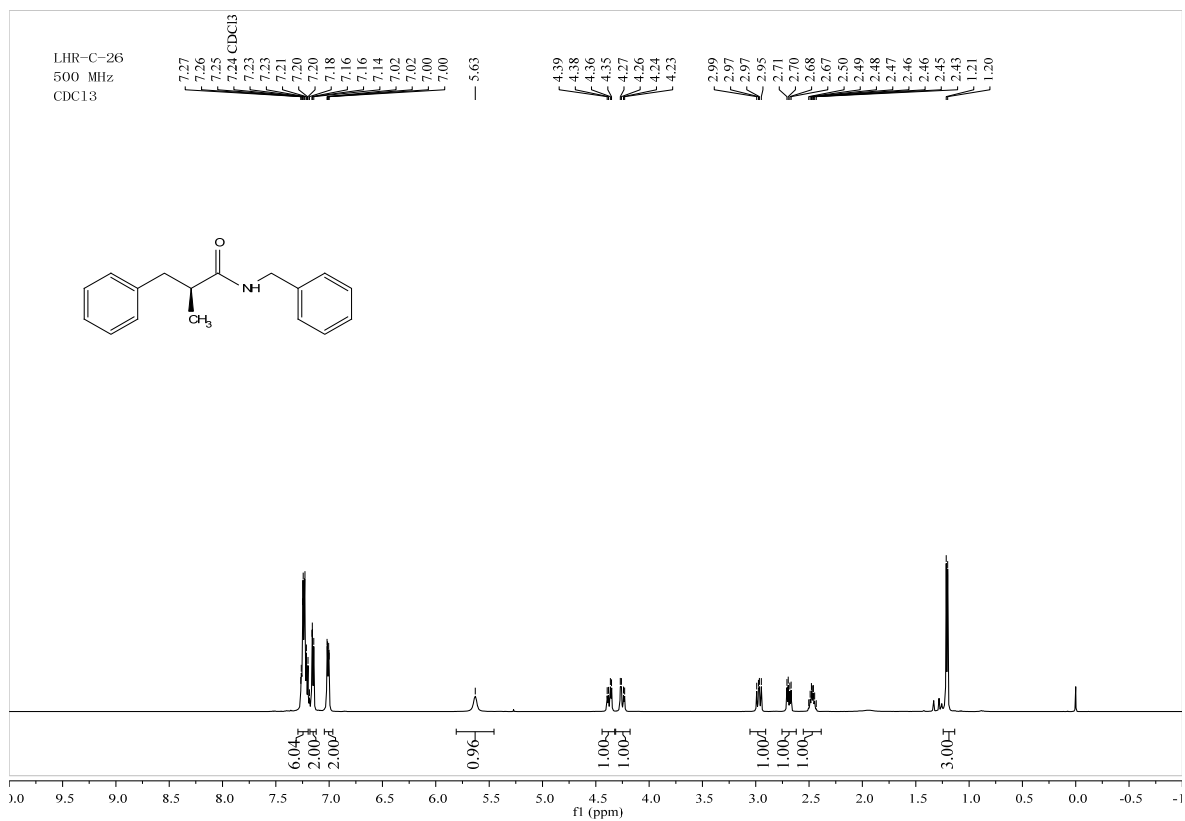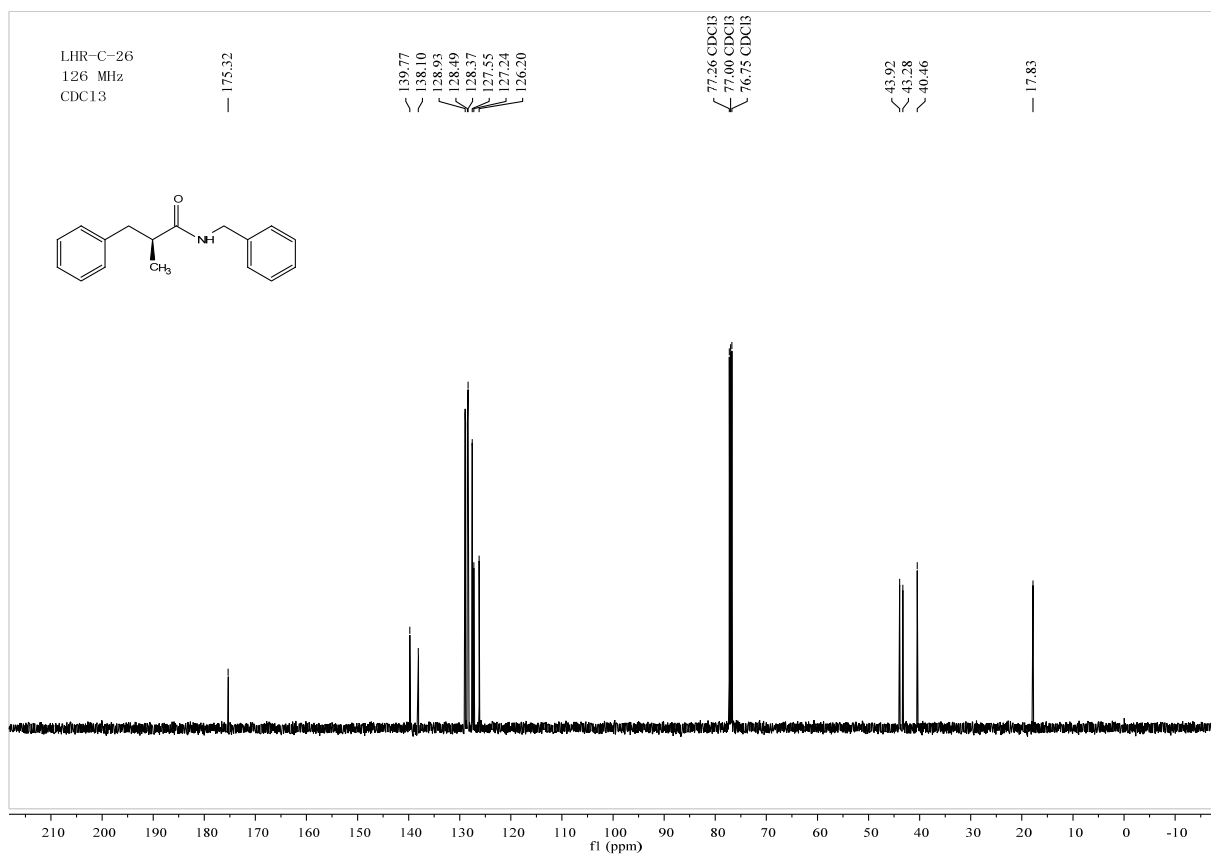

Figure S-17. <sup>1</sup>H NMR (500 MHz, CDCl<sub>3</sub>) and <sup>13</sup>C NMR (126 MHz, CDCl<sub>3</sub>) spectra of 3c.

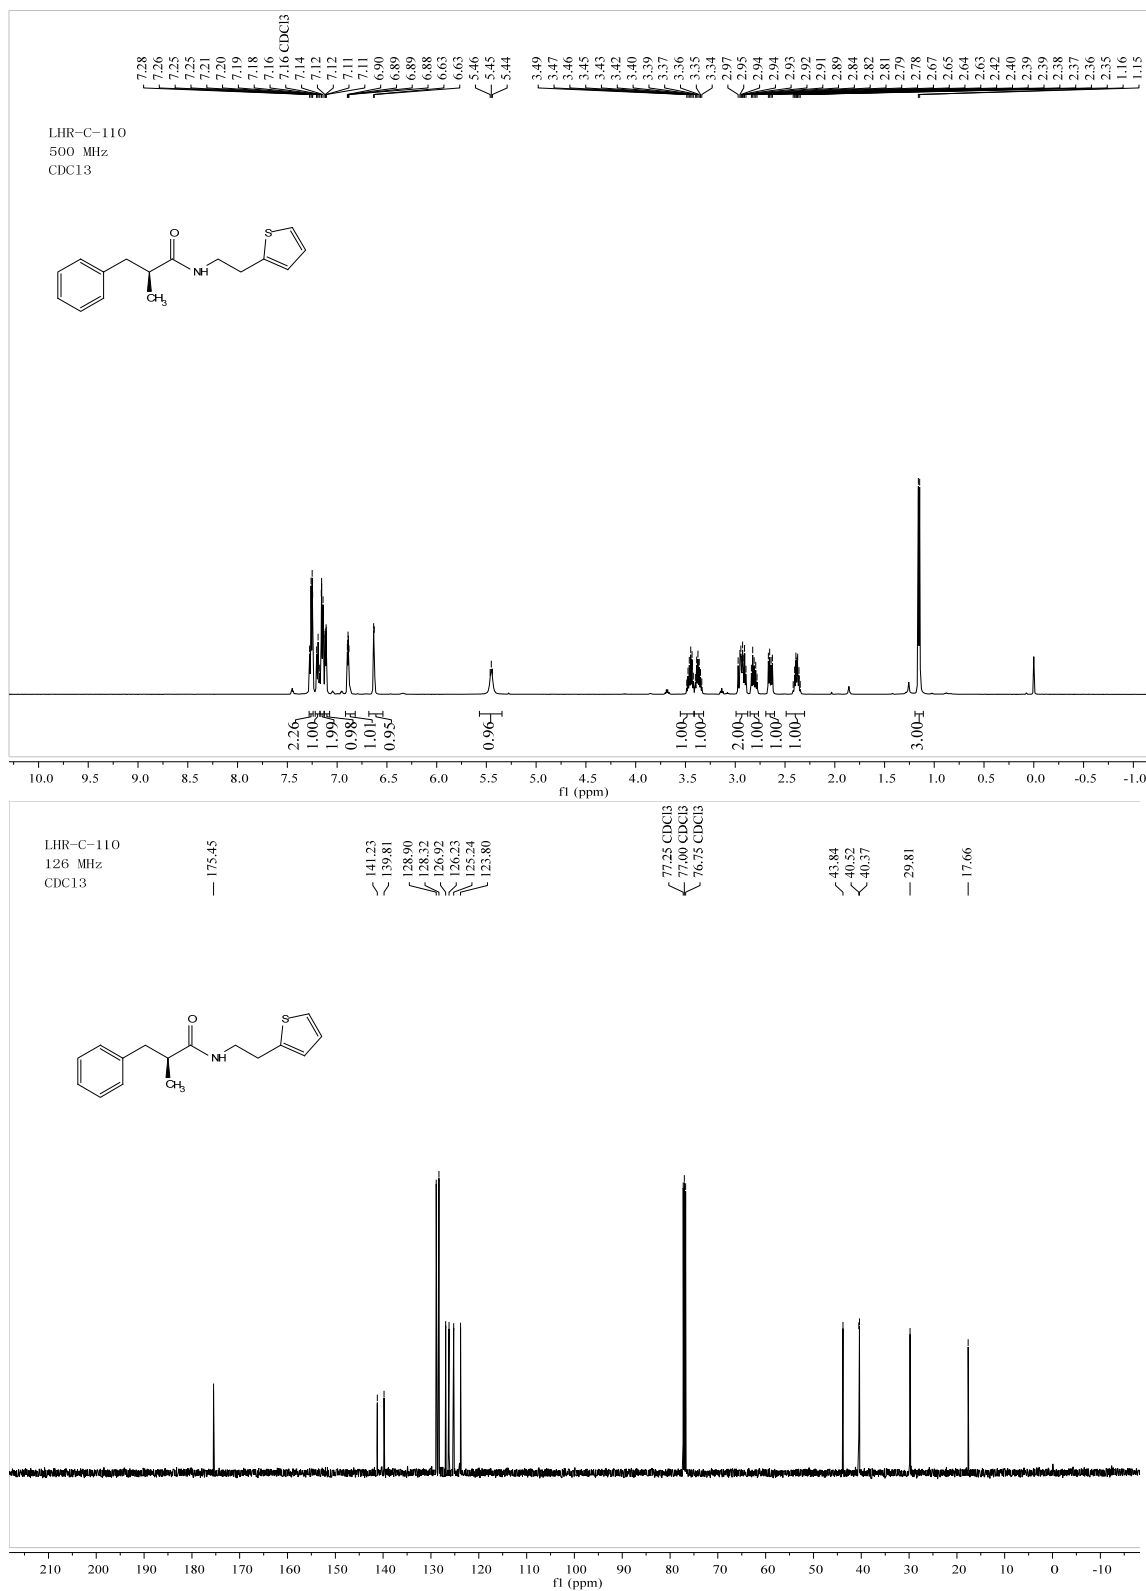

**Figure S-18.** <sup>1</sup>H NMR (500 MHz, CDCl<sub>3</sub>) and <sup>13</sup>C NMR (126 MHz, CDCl<sub>3</sub>) spectra of **3d**.

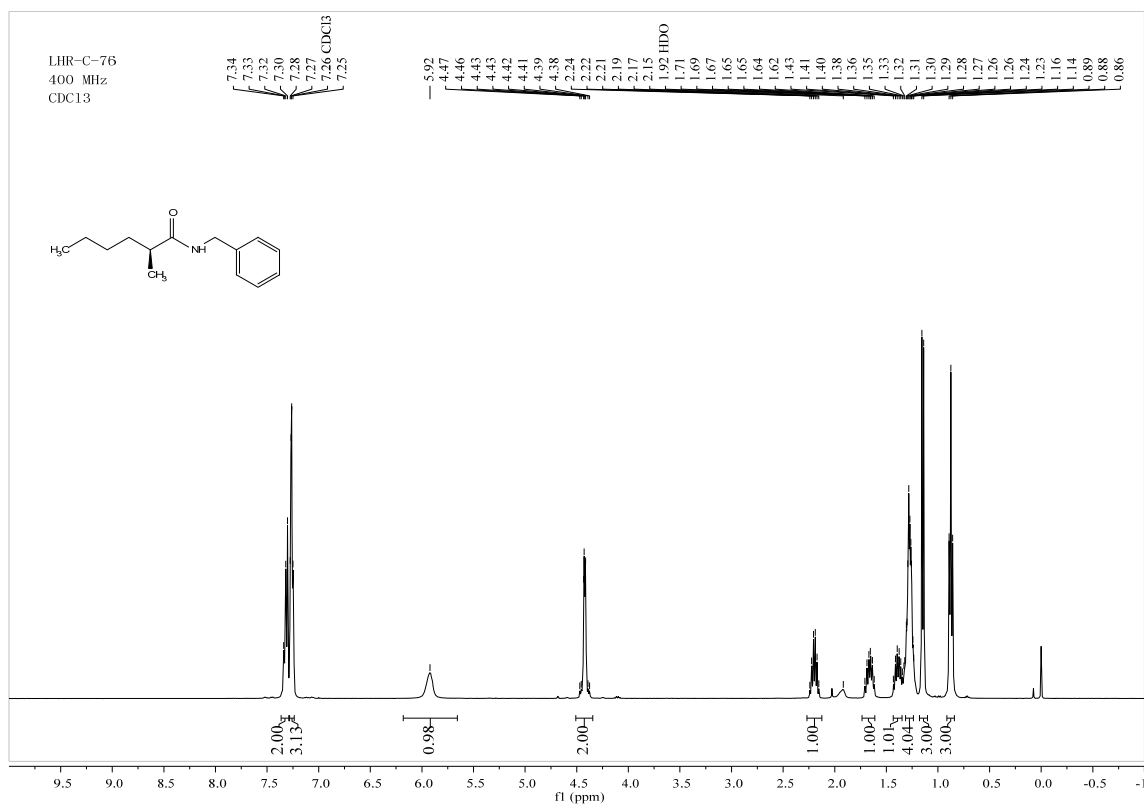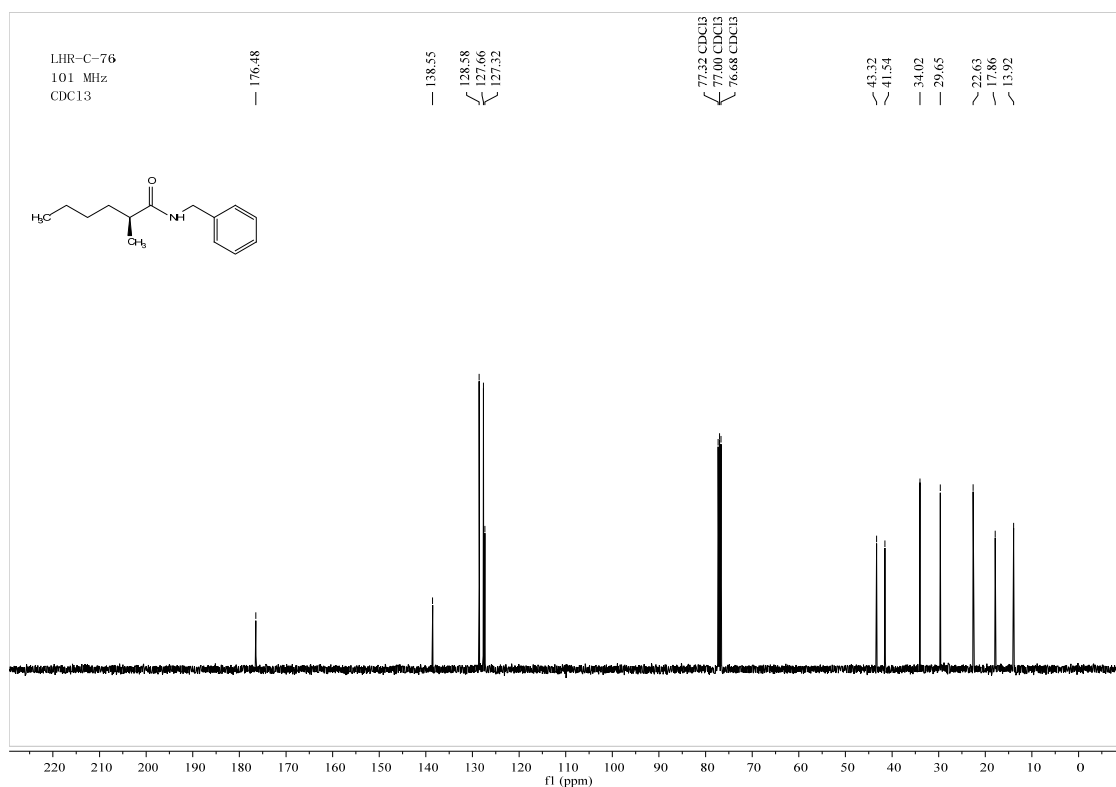

Figure S-19. <sup>1</sup>H NMR (400 MHz, CDCl<sub>3</sub>) and <sup>13</sup>C NMR (101 MHz, CDCl<sub>3</sub>) spectra of **3e**.

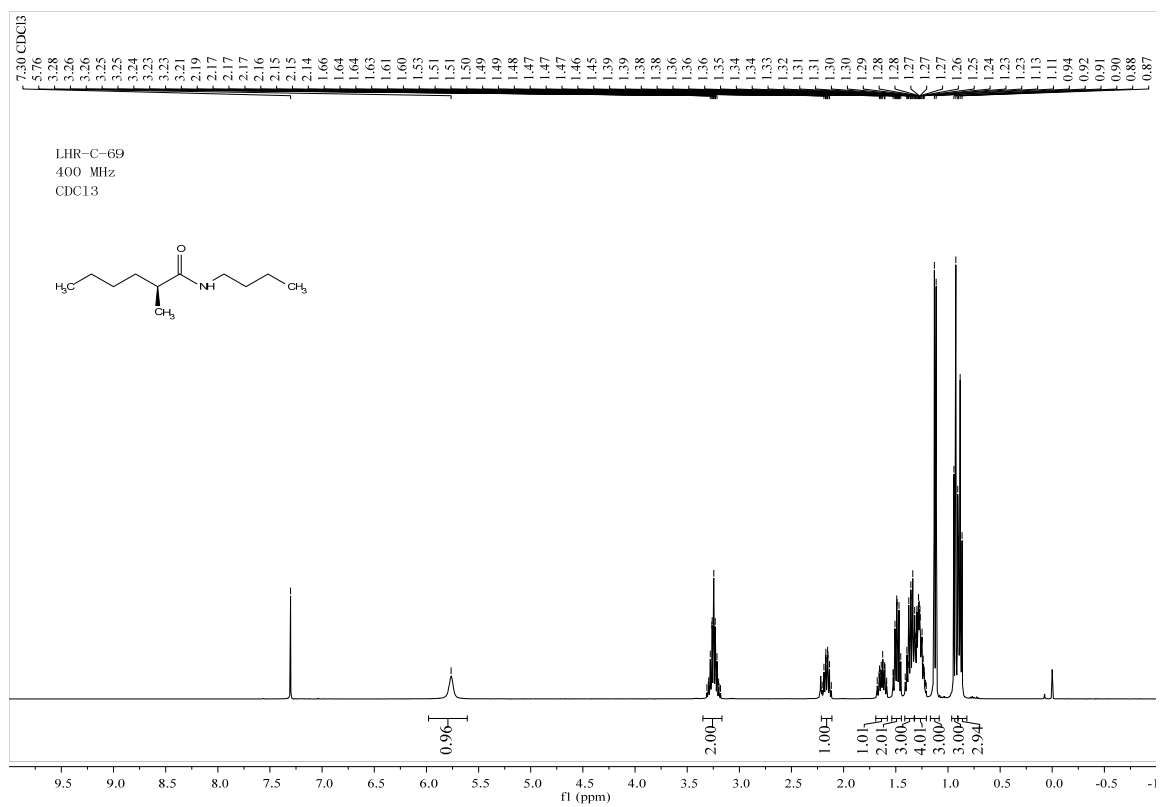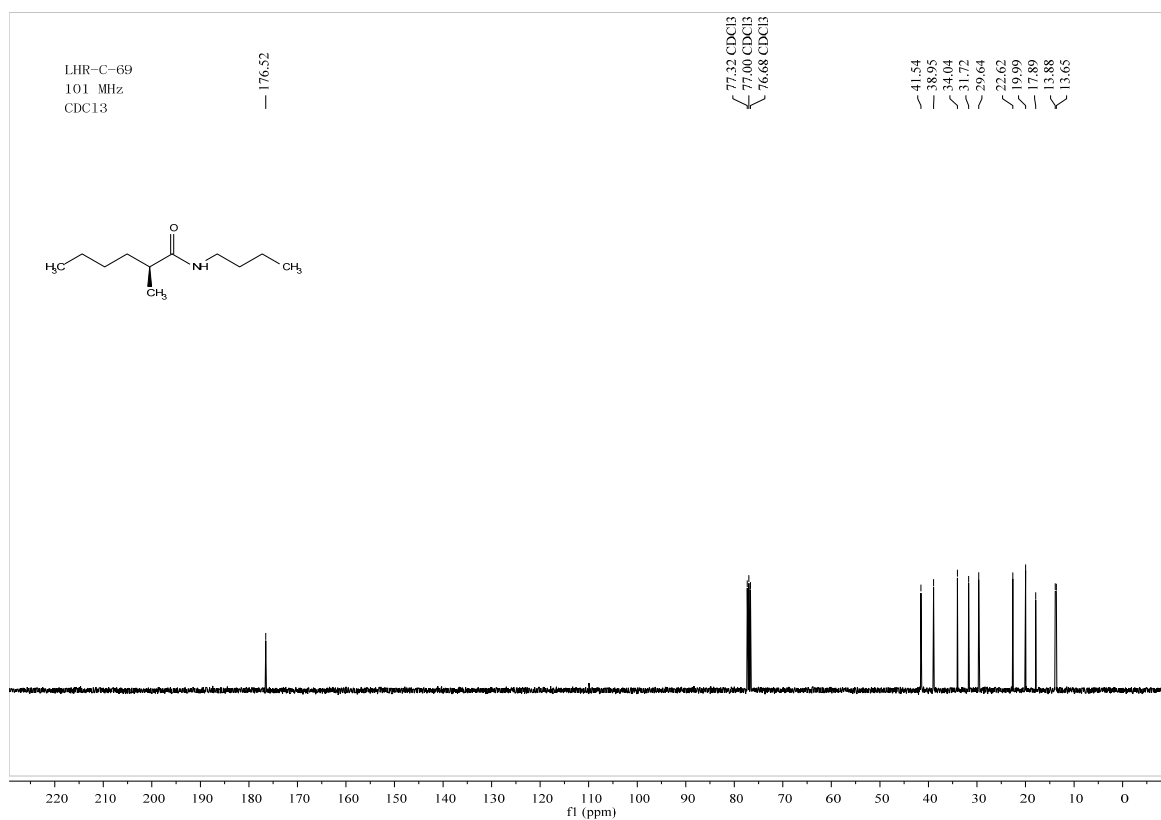

Figure S-20. <sup>1</sup>H NMR (400 MHz, CDCl<sub>3</sub>) and <sup>13</sup>C NMR (101 MHz, CDCl<sub>3</sub>) spectra of **3f**.



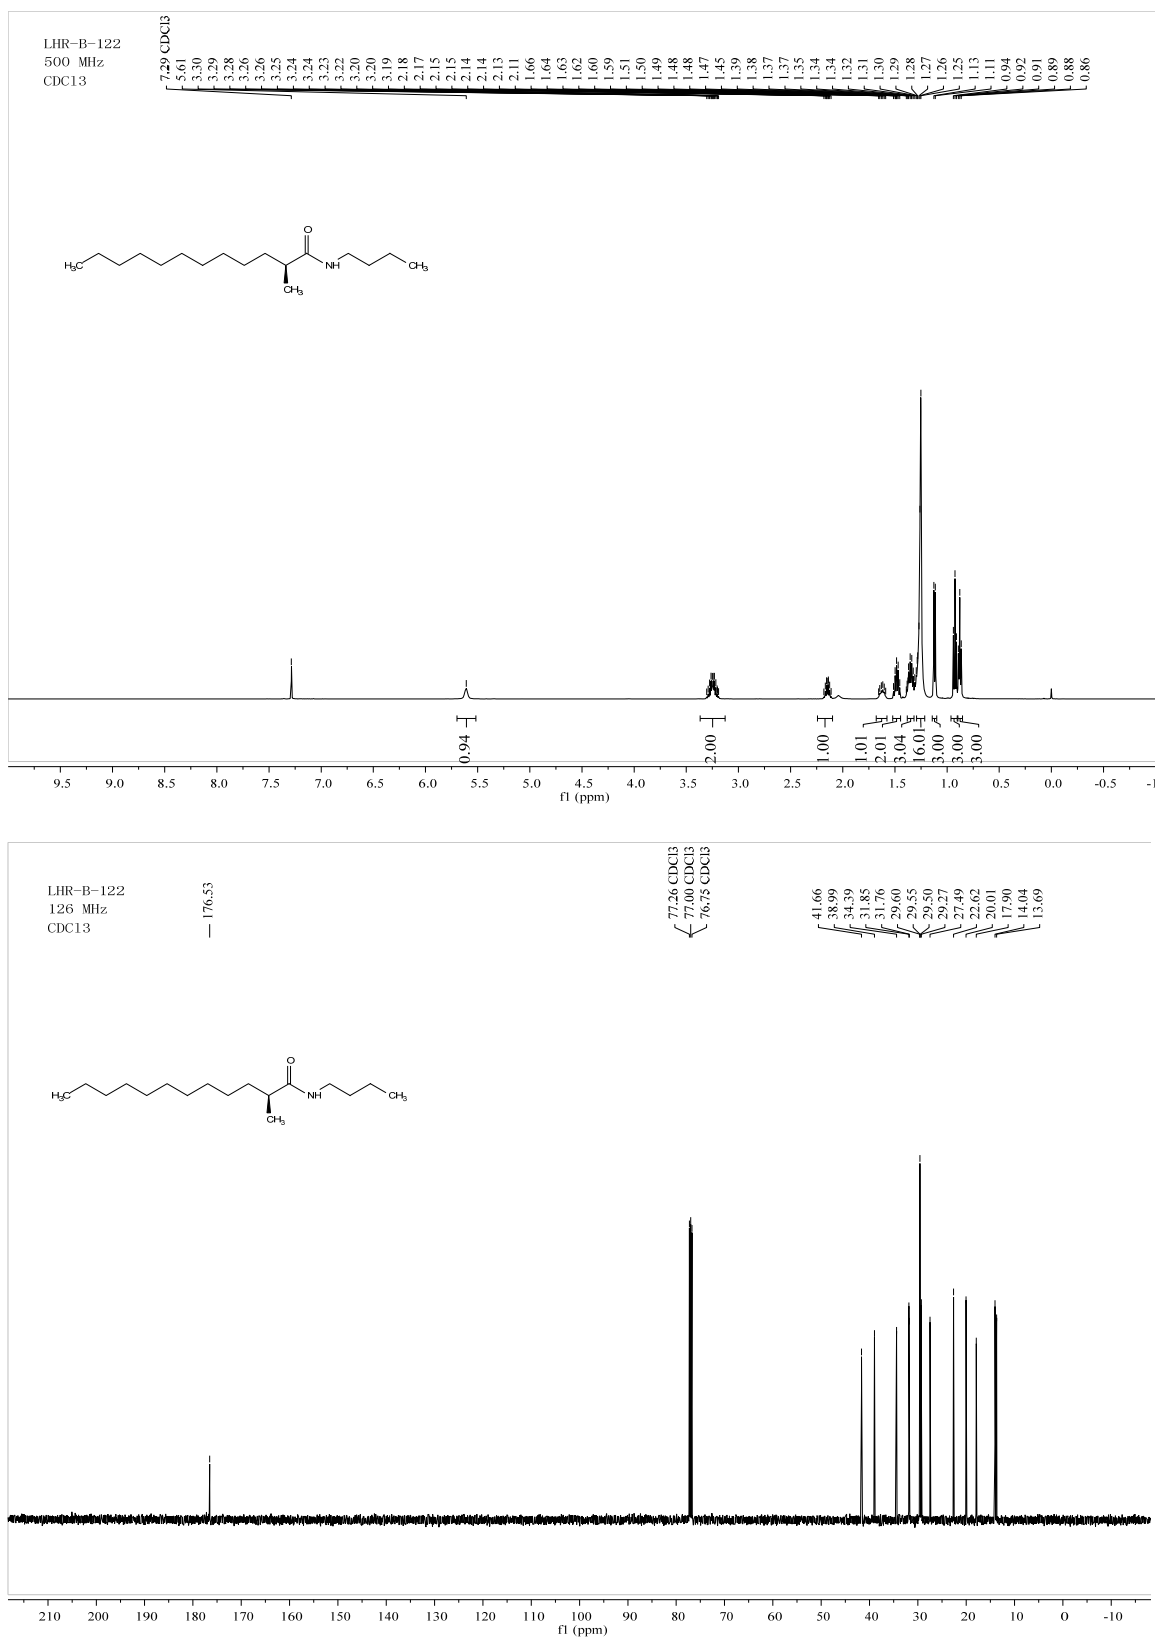

Figure S-21. <sup>1</sup>H NMR (500 MHz, CDCl<sub>3</sub>) and <sup>13</sup>C NMR (126 MHz, CDCl<sub>3</sub>) spectra of **3g**.

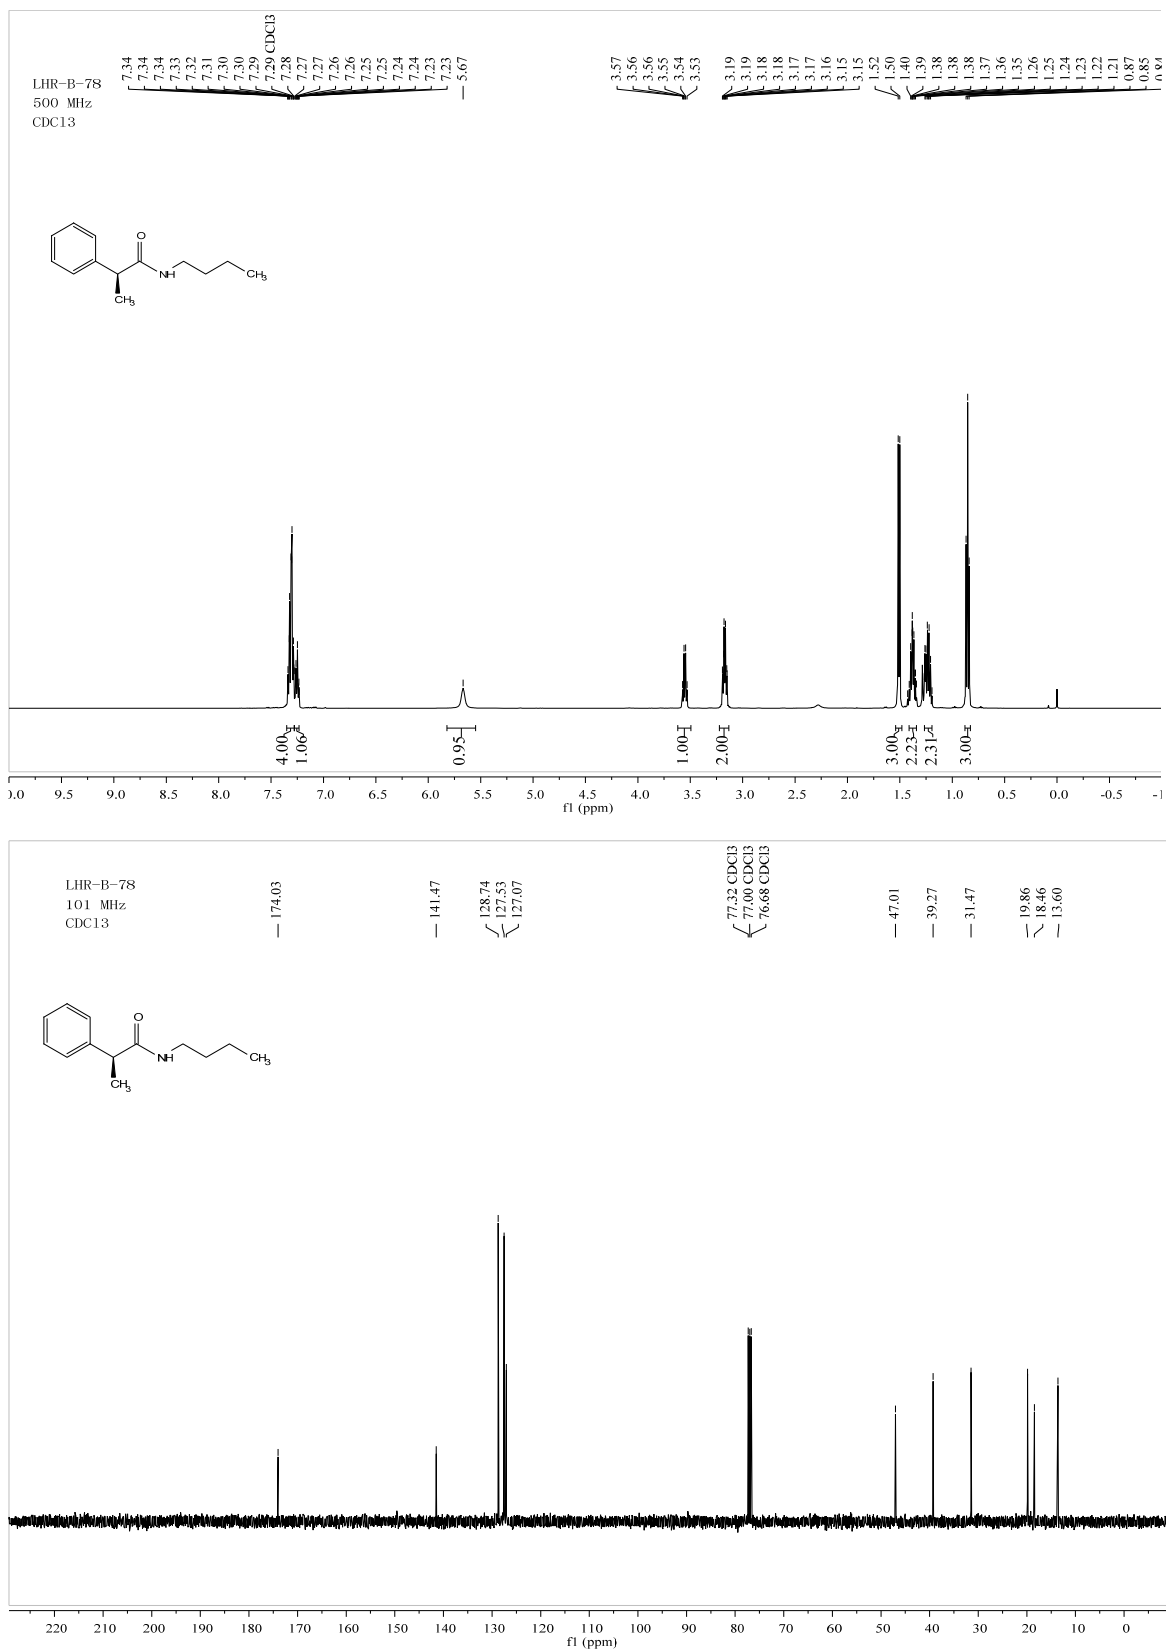

Figure S-22. <sup>1</sup>H NMR (500 MHz, CDCl<sub>3</sub>) and <sup>13</sup>C NMR (101 MHz, CDCl<sub>3</sub>) spectra of **3h**.

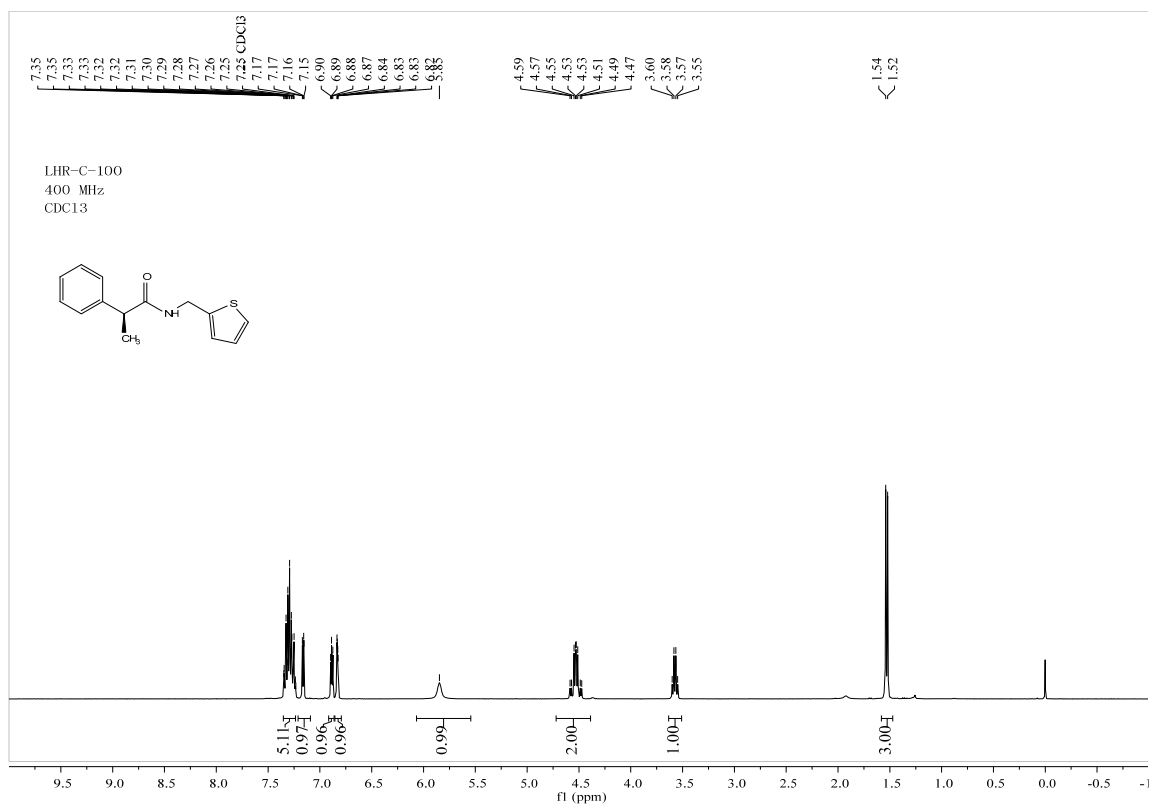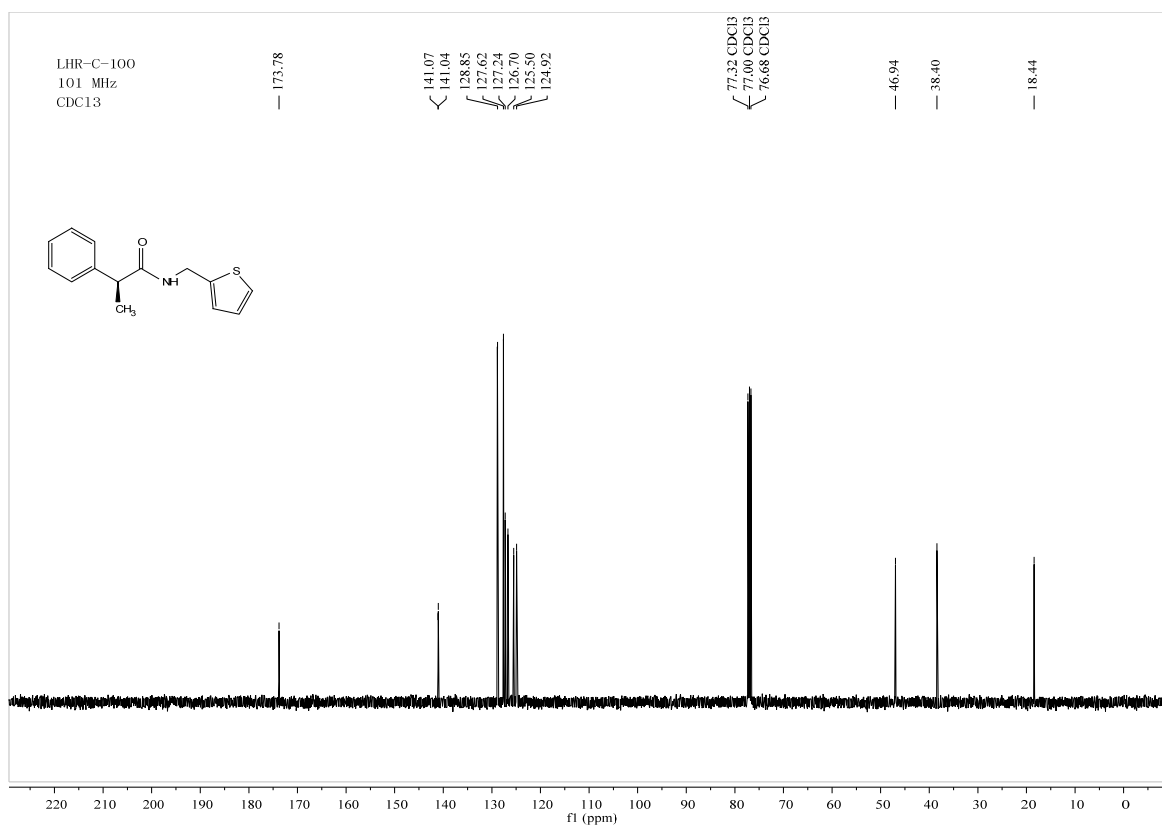

**Figure S-23.** <sup>1</sup>H NMR (400 MHz, CDCl<sub>3</sub>) and <sup>13</sup>C NMR (101 MHz, CDCl<sub>3</sub>) spectra of **3i**.

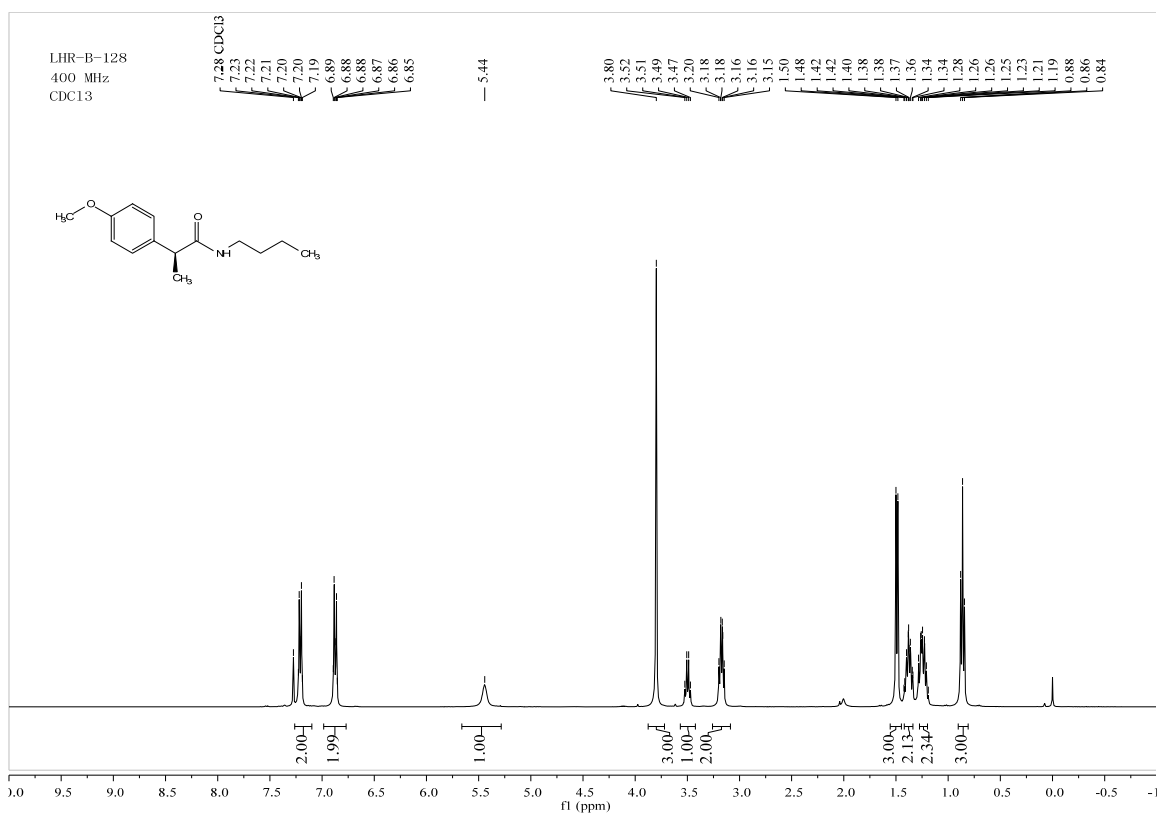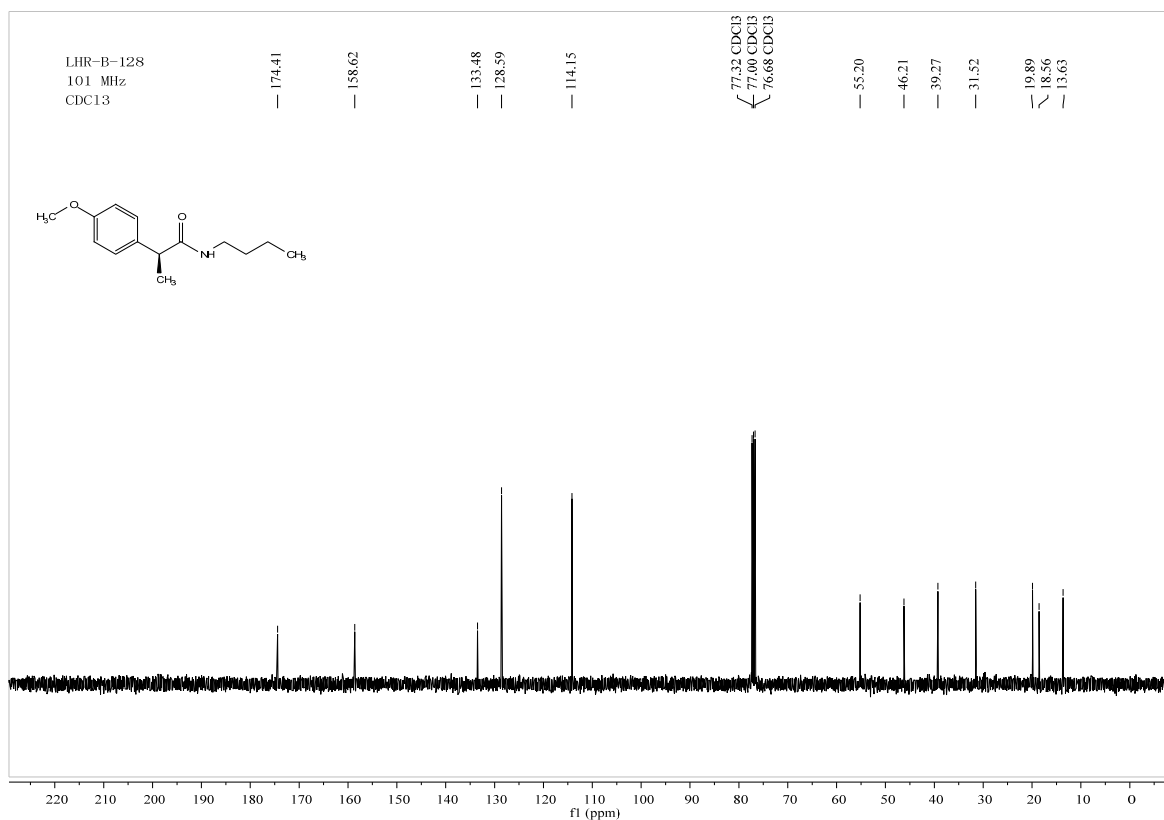

Figure S-24. <sup>1</sup>H NMR (400 MHz, CDCl<sub>3</sub>) and <sup>13</sup>C NMR (101 MHz, CDCl<sub>3</sub>) spectra of **3j**.

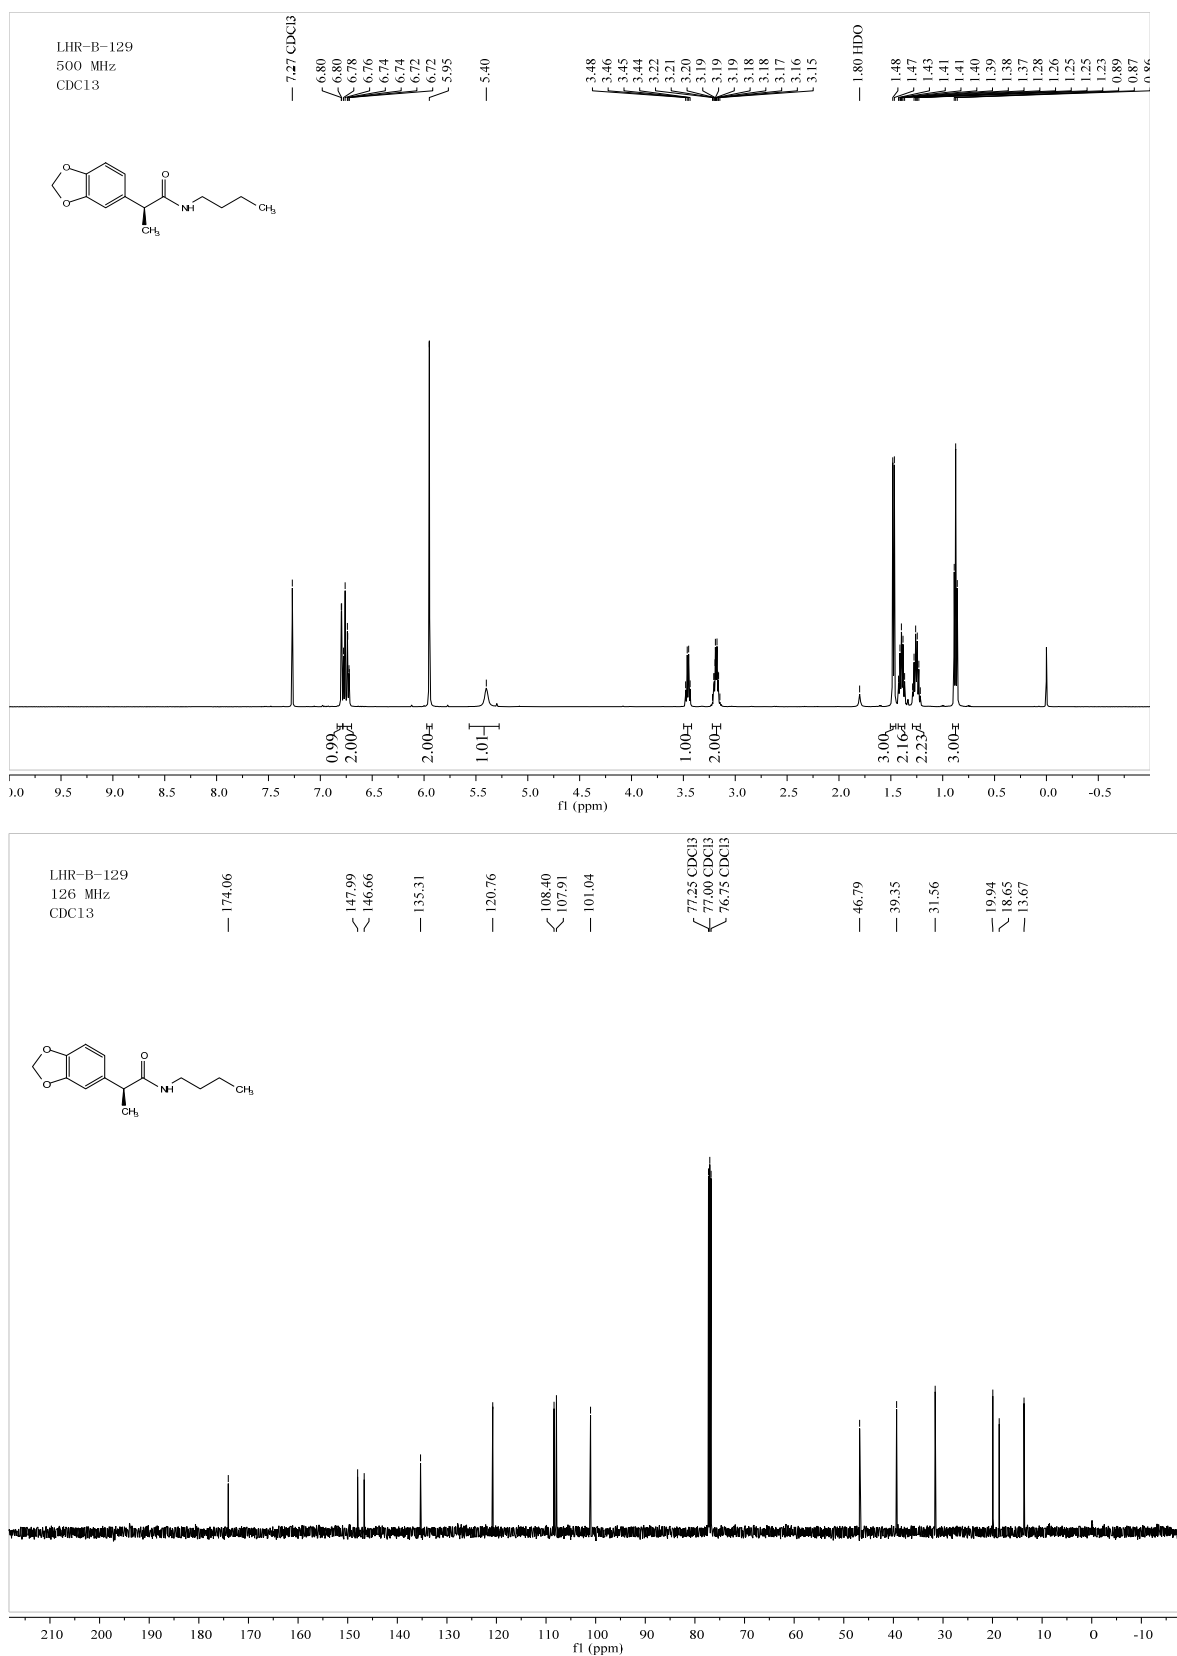

**Figure S-25.** <sup>1</sup>H NMR (500 MHz, CDCl<sub>3</sub>) and <sup>13</sup>C NMR (126 MHz, CDCl<sub>3</sub>) spectra of **3k**.

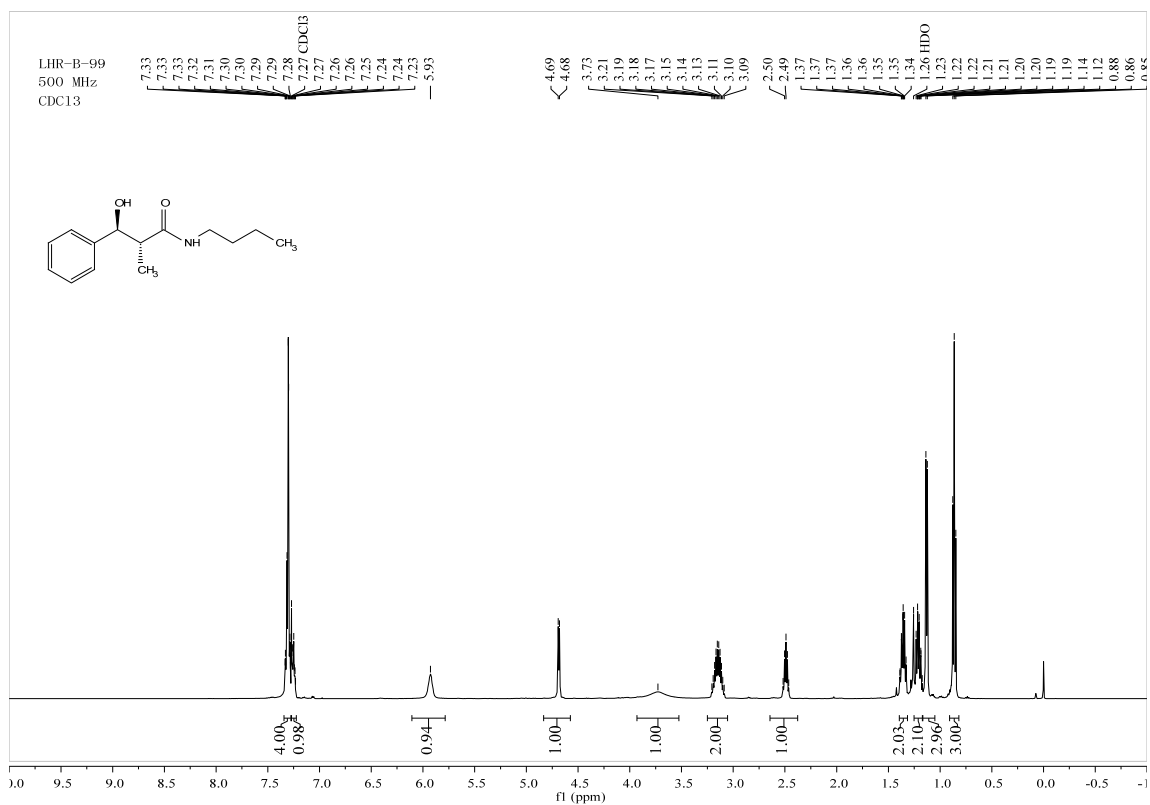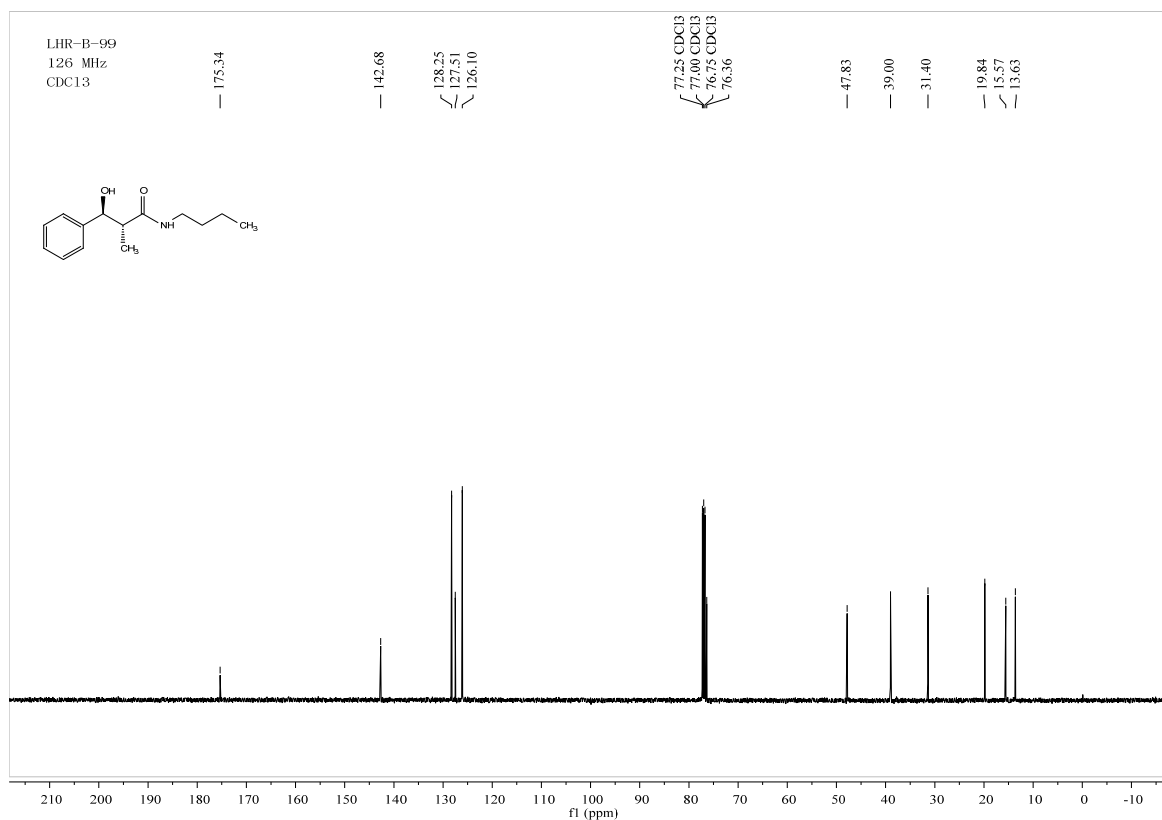

Figure S-26. <sup>1</sup>H NMR (500 MHz, CDCl<sub>3</sub>) and <sup>13</sup>C NMR (126 MHz, CDCl<sub>3</sub>) spectra of **31**.

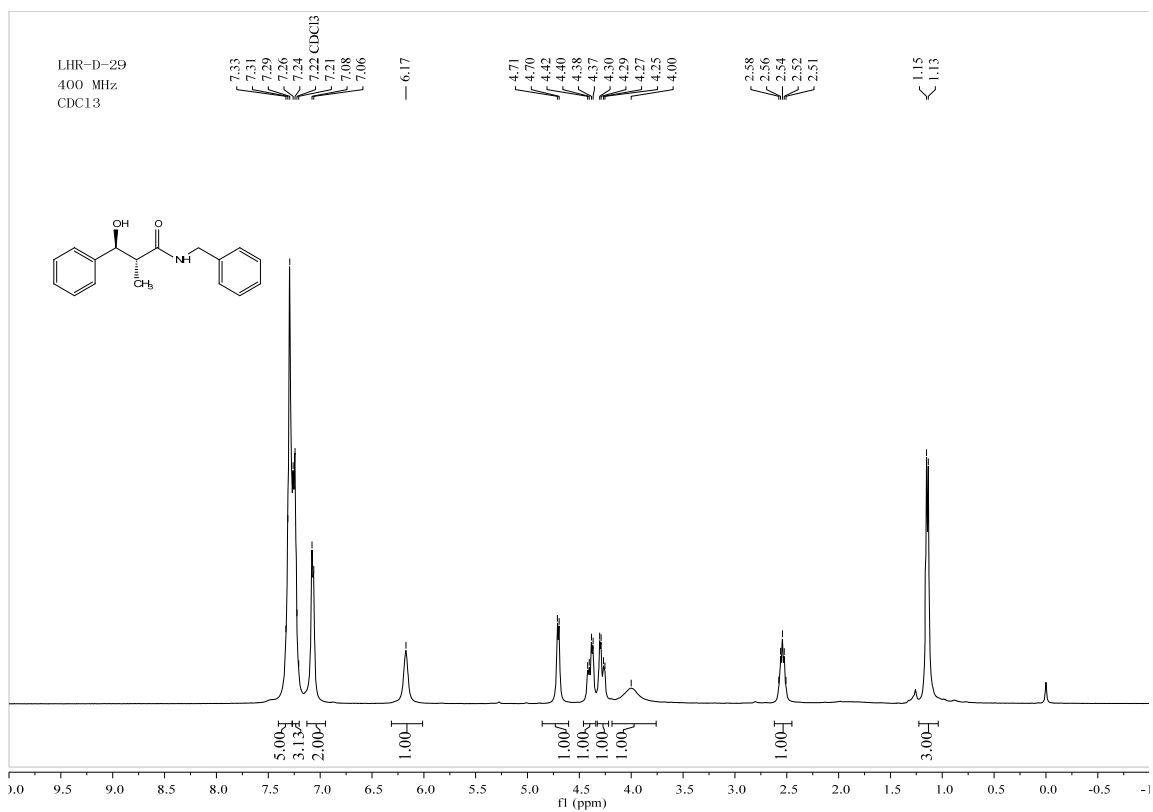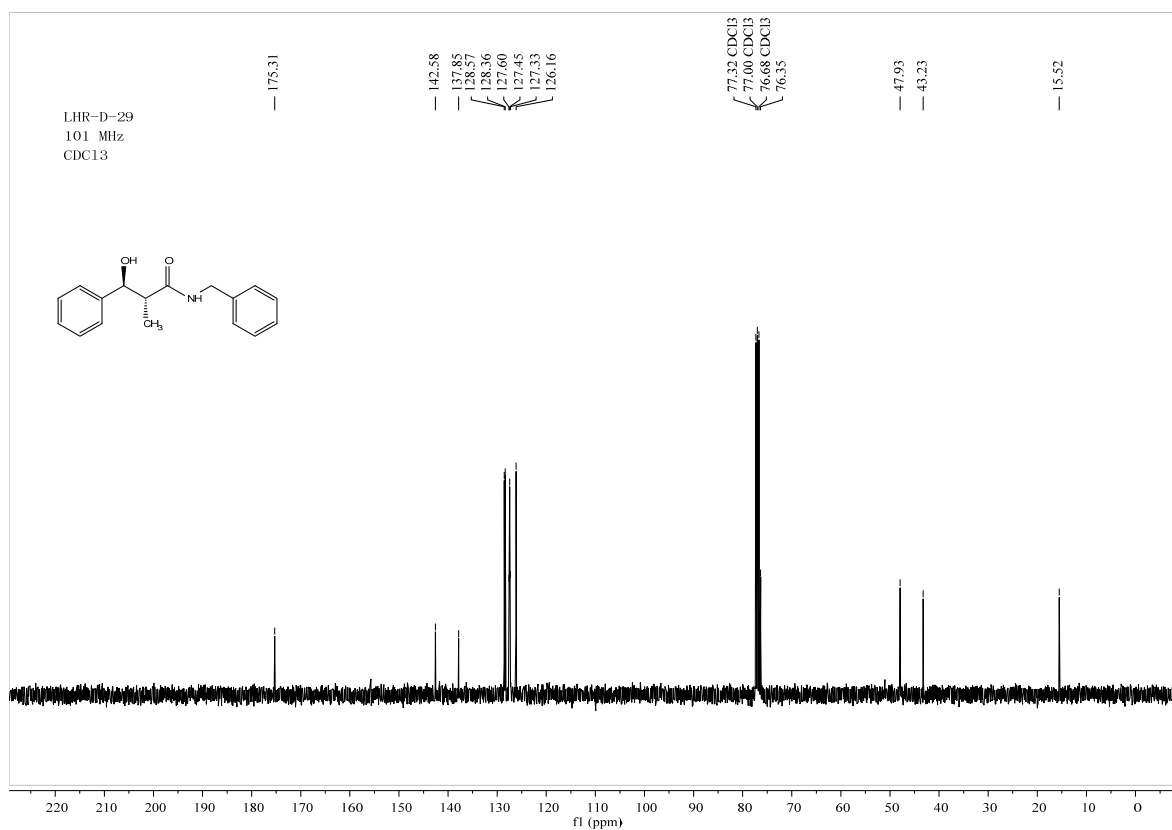

**Figure S-27.** <sup>1</sup>H NMR (400 MHz, CDCl<sub>3</sub>) and <sup>13</sup>C NMR (101 MHz, CDCl<sub>3</sub>) spectra of **3m**.

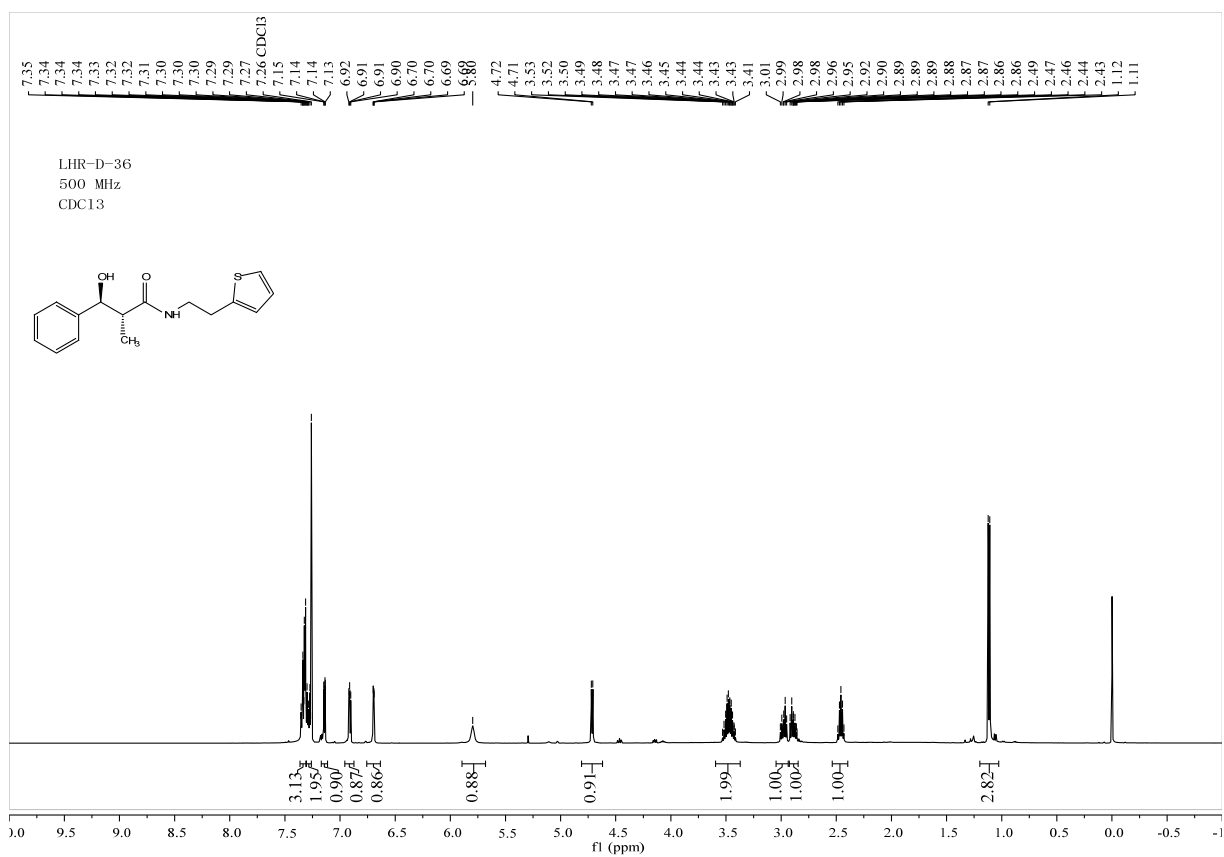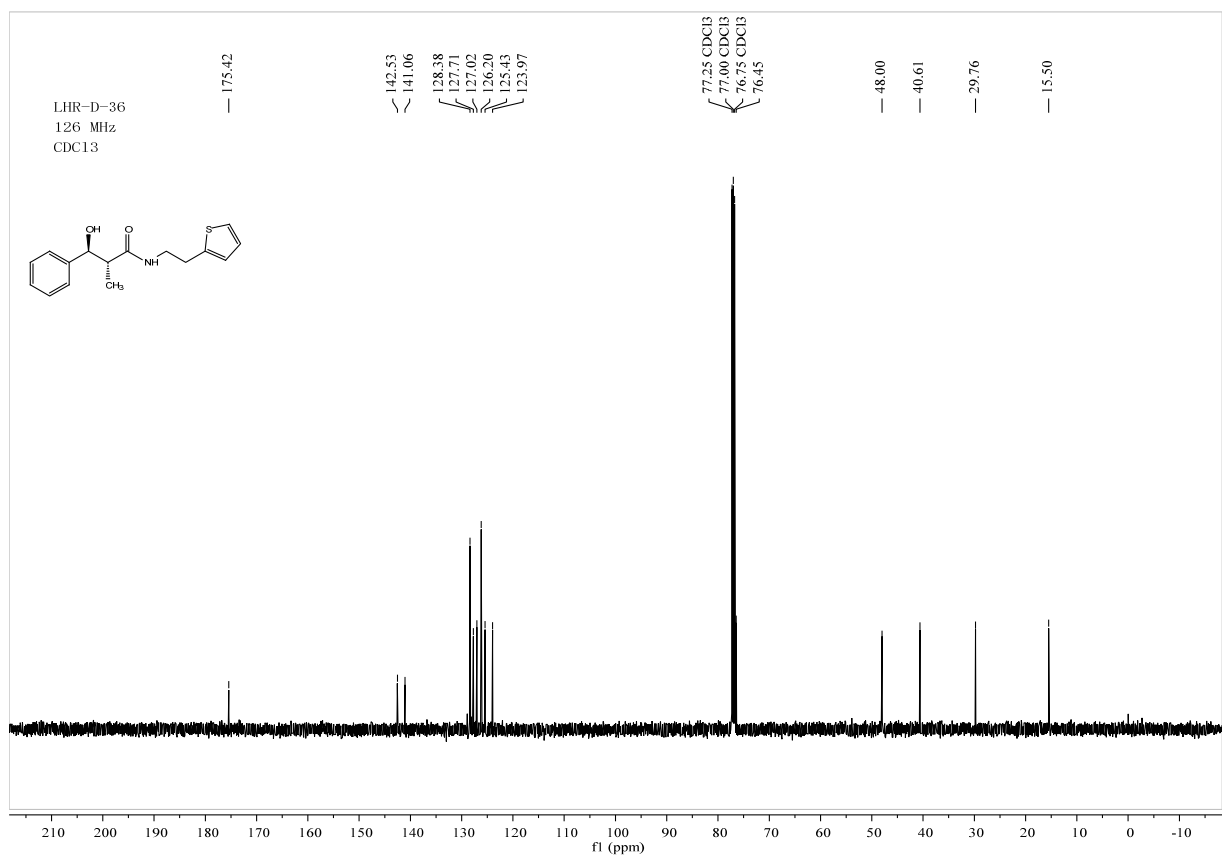

Figure S-28. <sup>1</sup>H NMR (500 MHz, CDCl<sub>3</sub>) and <sup>13</sup>C NMR (126 MHz, CDCl<sub>3</sub>) spectra of **3n**.



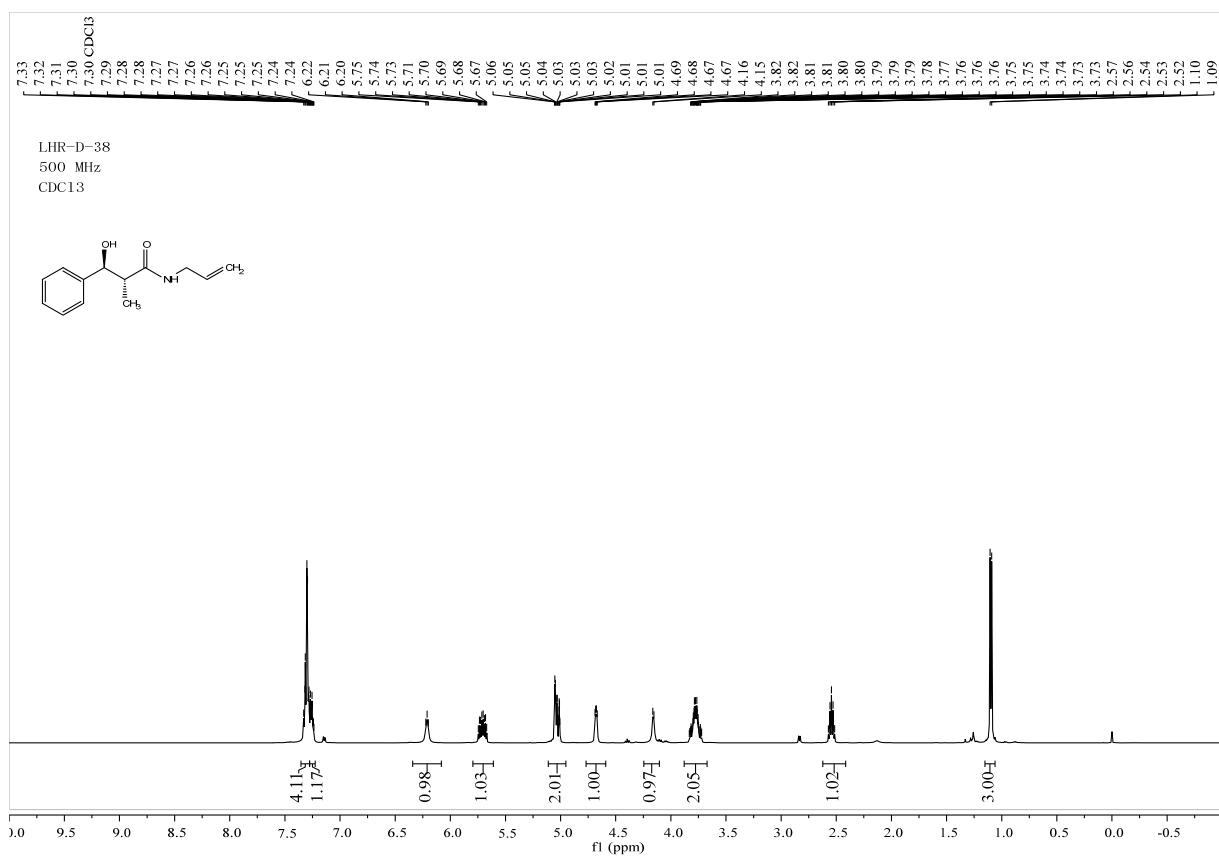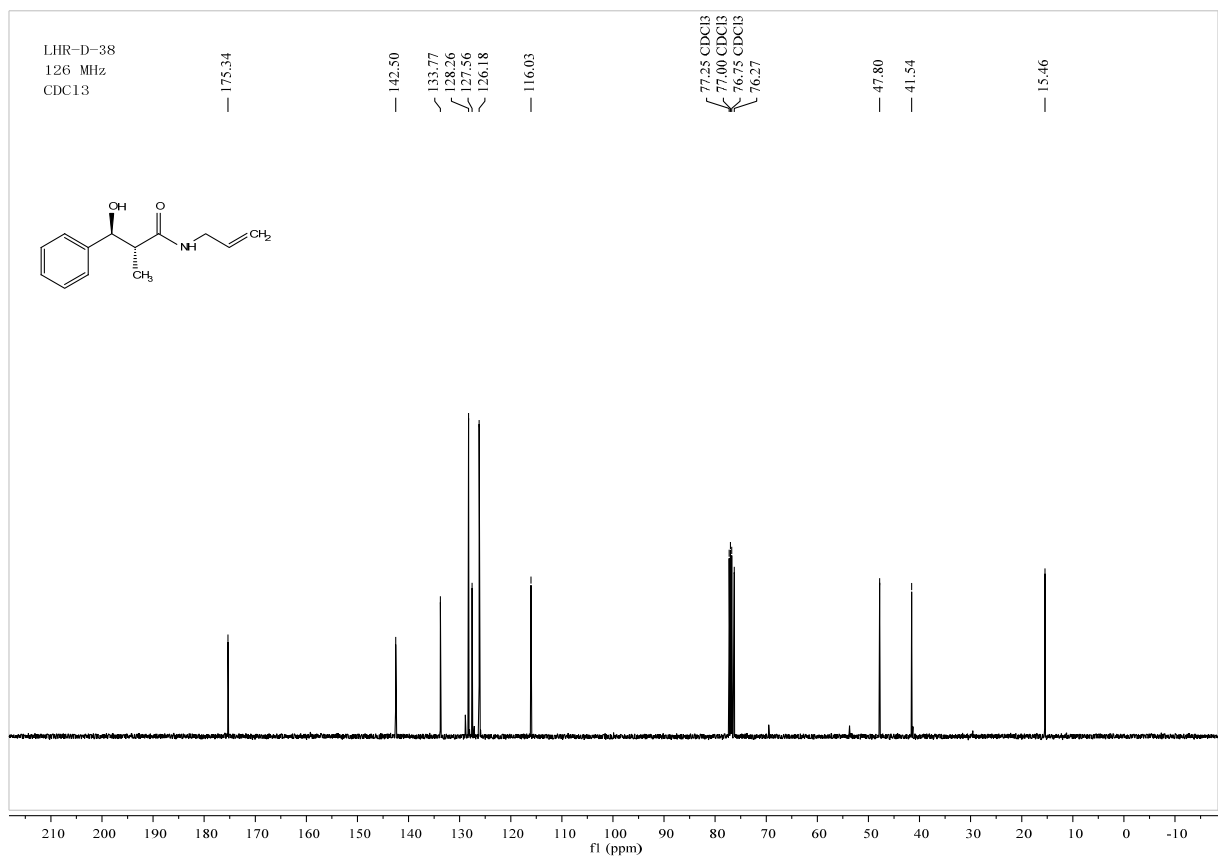

Figure S-29. <sup>1</sup>H NMR (500 MHz, CDCl<sub>3</sub>) and <sup>13</sup>C NMR (126 MHz, CDCl<sub>3</sub>) spectra of **30**.

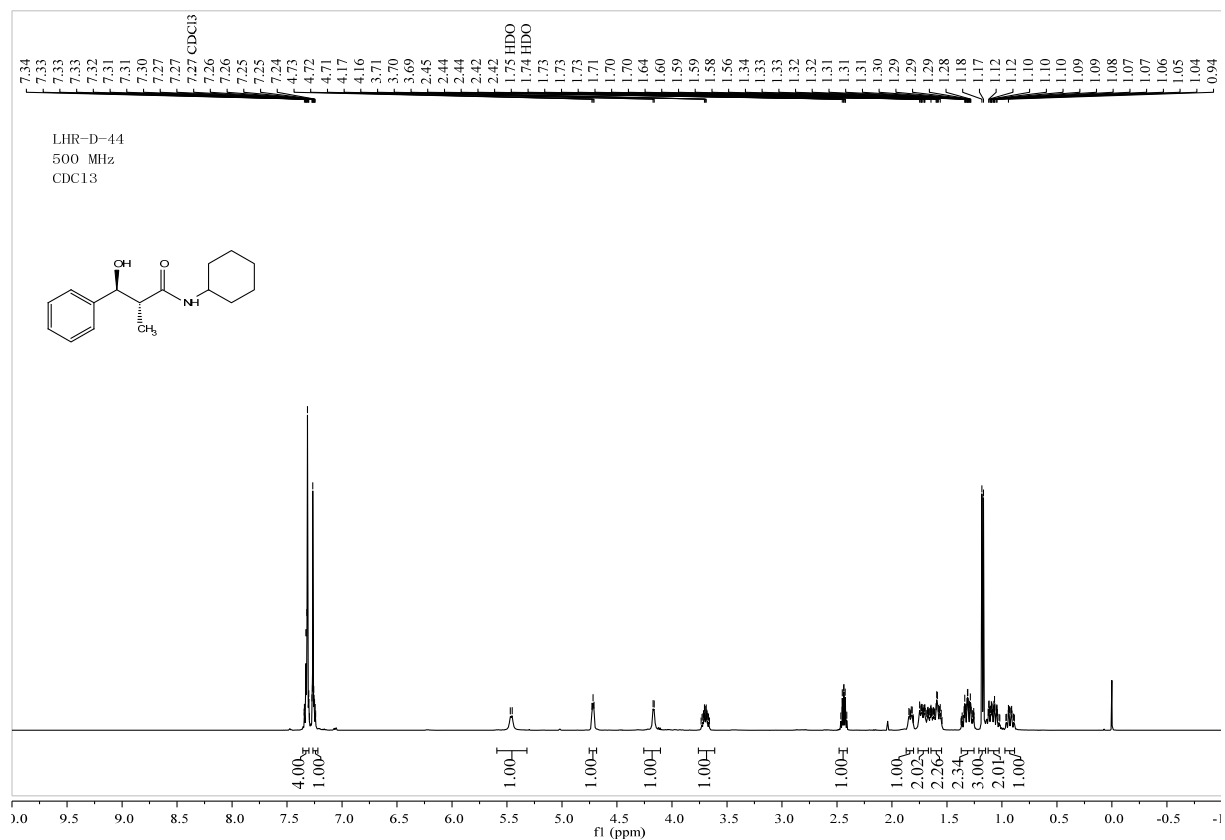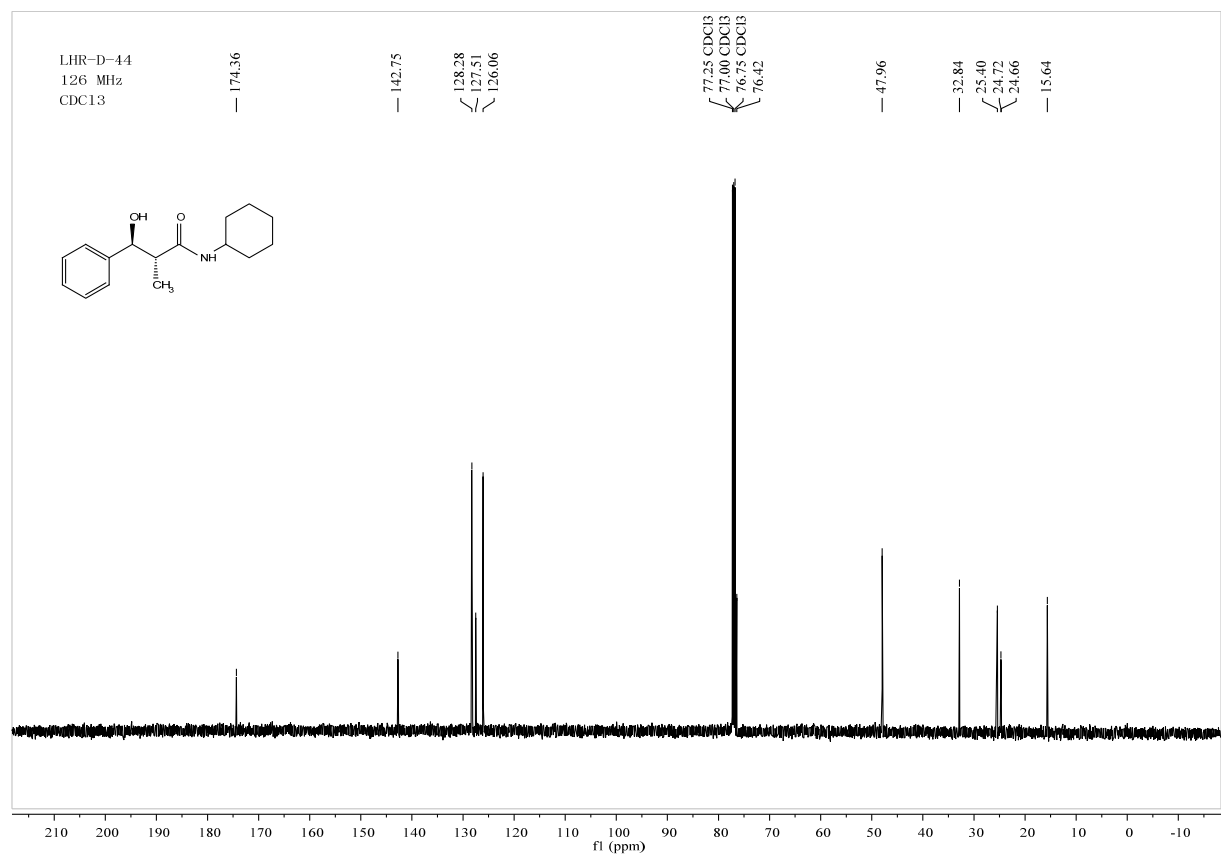

Figure S-30. <sup>1</sup>H NMR (500 MHz, CDCl<sub>3</sub>) and <sup>13</sup>C NMR (126 MHz, CDCl<sub>3</sub>) spectra of **3p**.

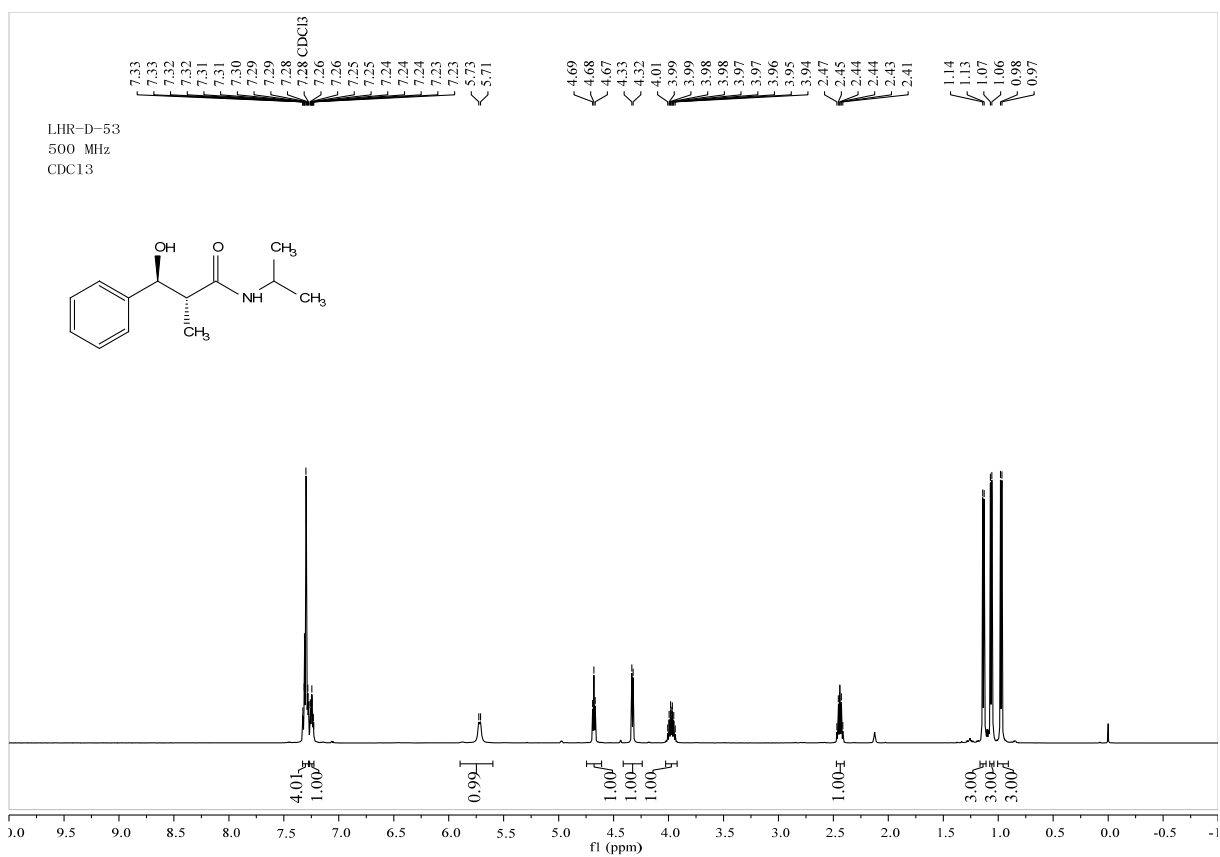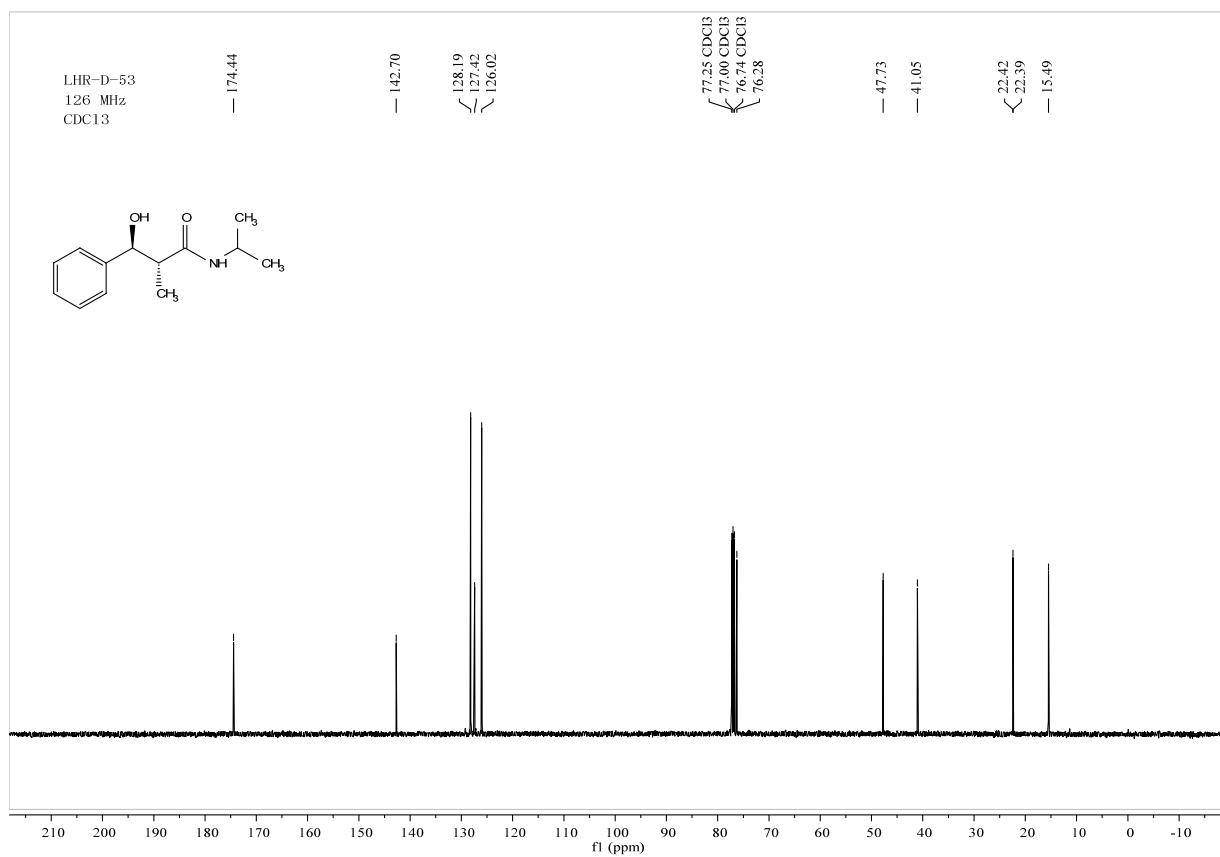

**Figure S-31.** <sup>1</sup>H NMR (500 MHz, CDCl<sub>3</sub>) and <sup>13</sup>C NMR (126 MHz, CDCl<sub>3</sub>) spectra of **3q**.

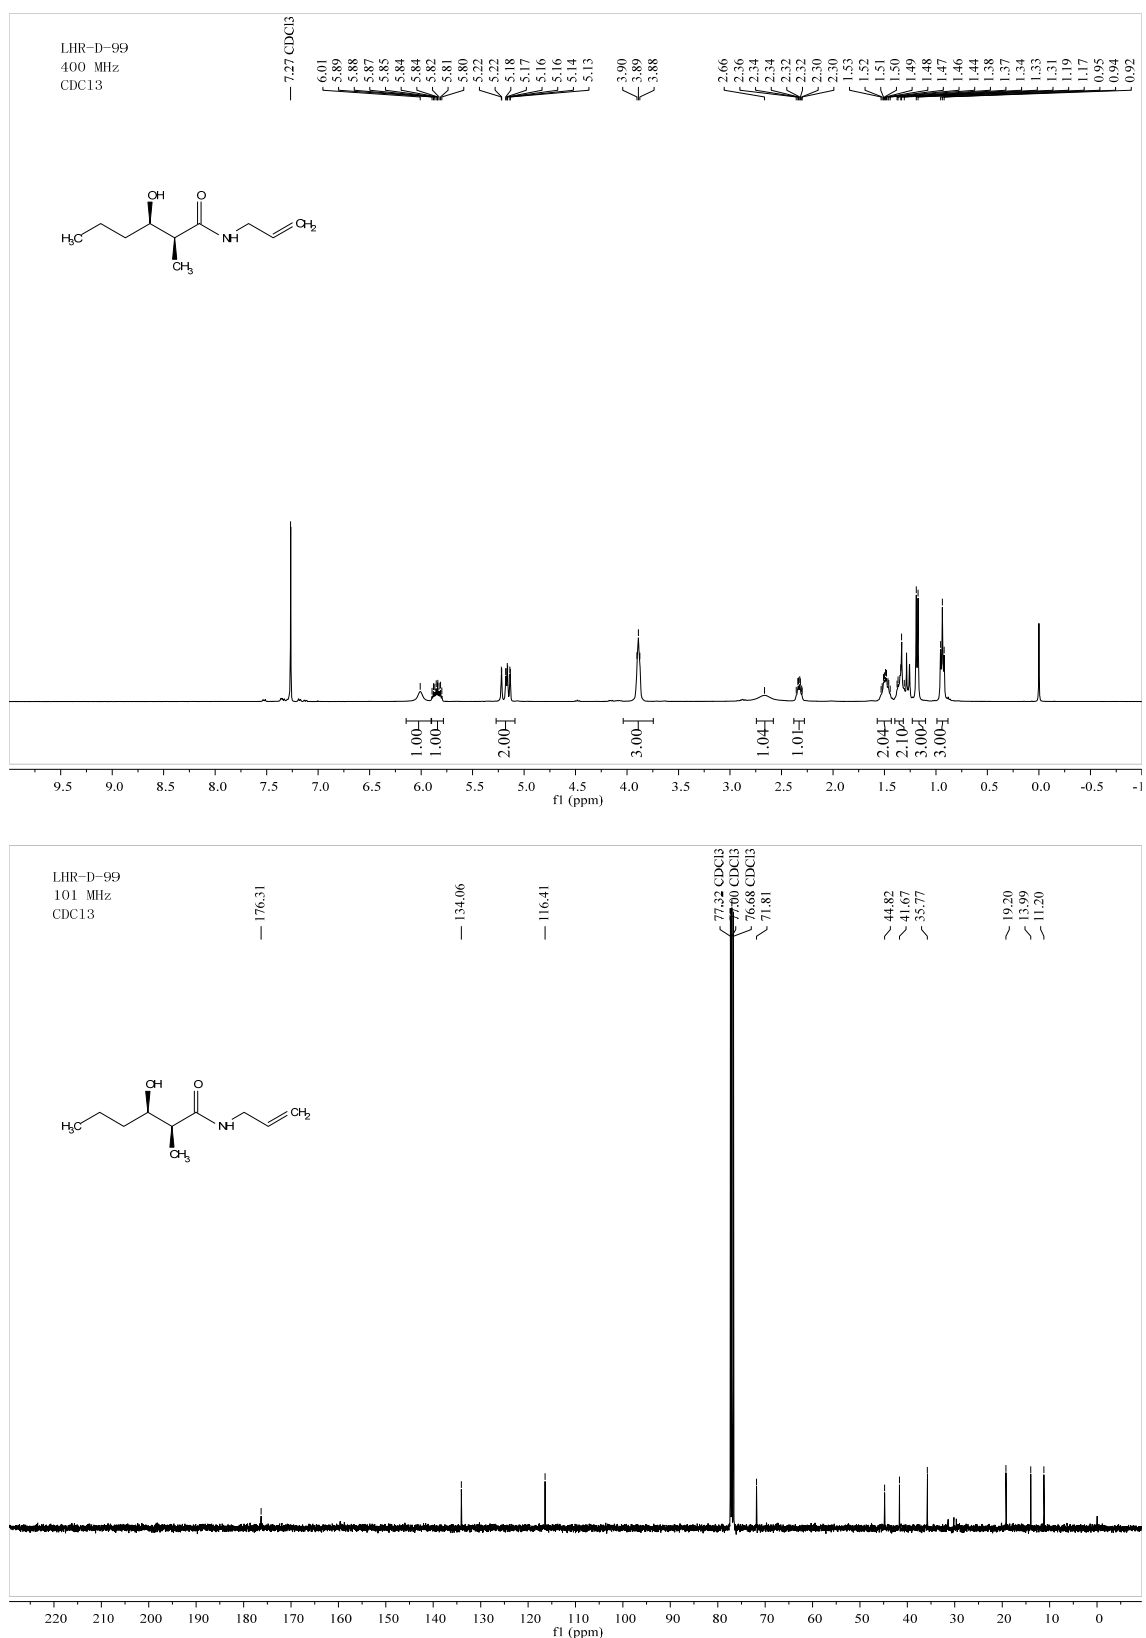

Figure S-32. <sup>1</sup>H NMR (400 MHz, CDCl<sub>3</sub>) and <sup>13</sup>C NMR (101 MHz, CDCl<sub>3</sub>) spectra of **3r**.

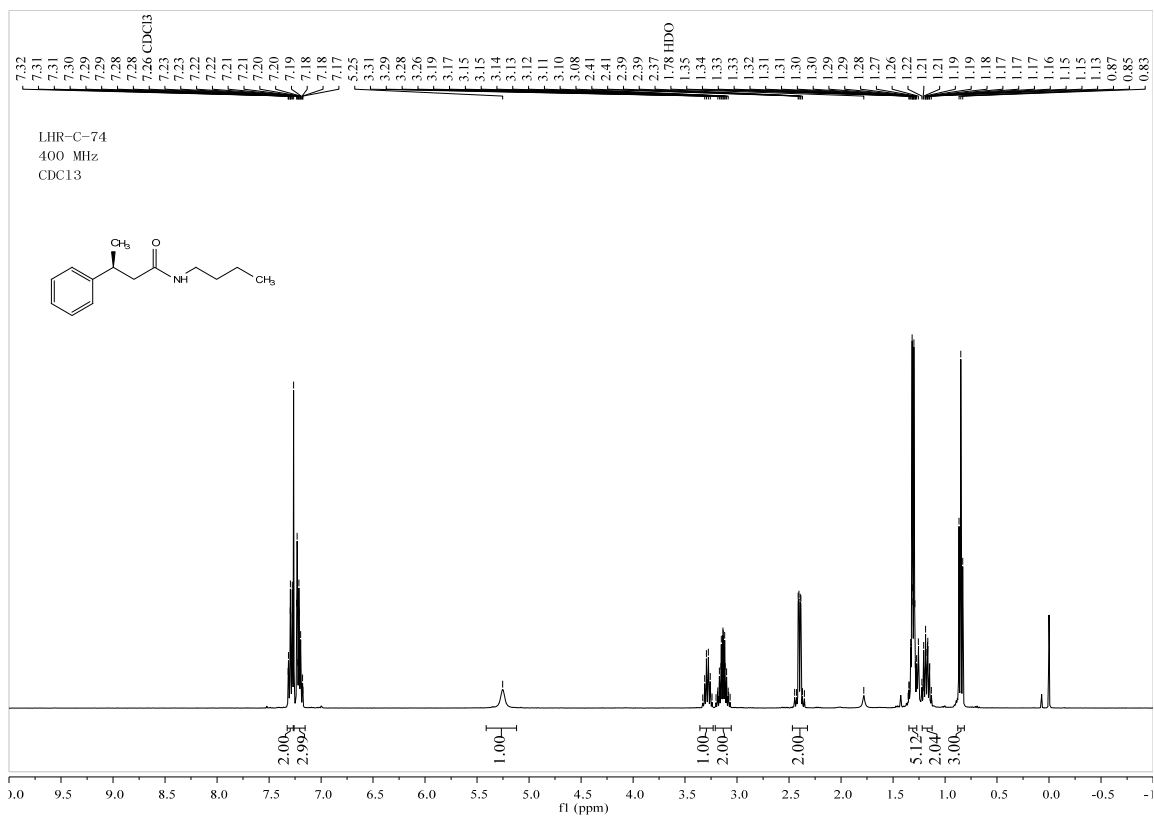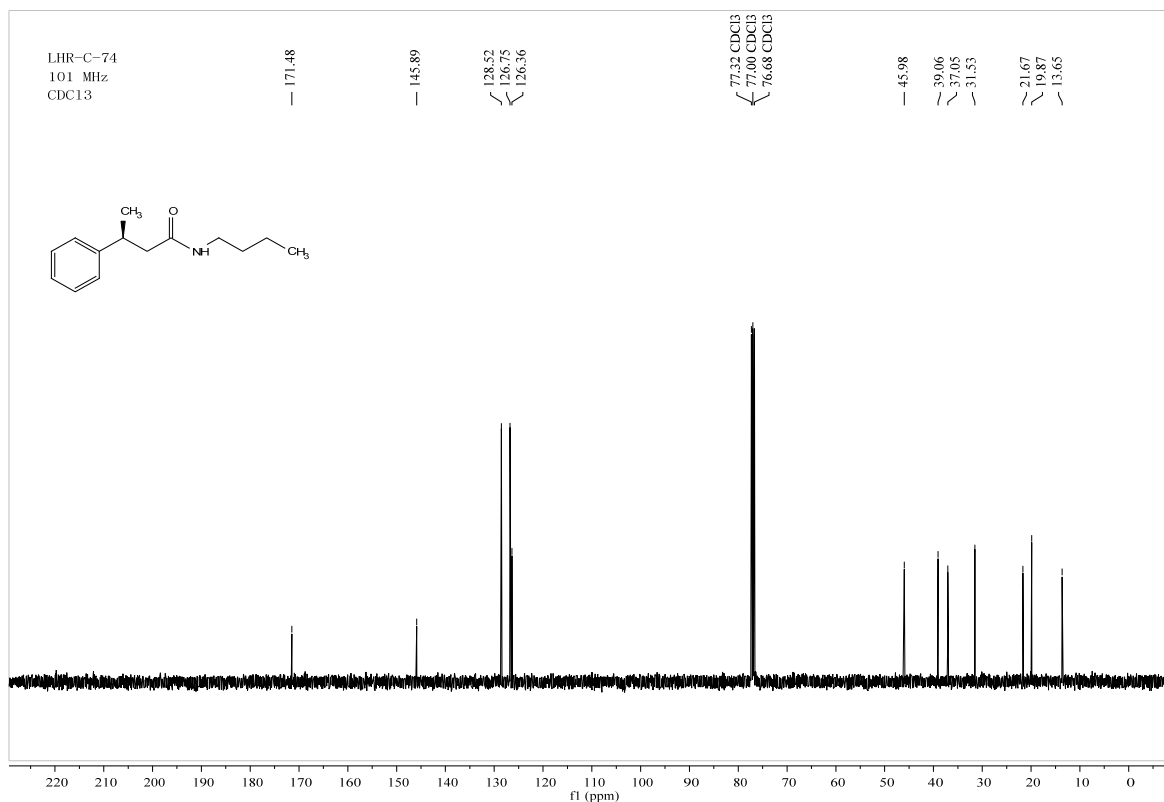

Figure S-33. <sup>1</sup>H NMR (400 MHz, CDCl<sub>3</sub>) and <sup>13</sup>C NMR (101 MHz, CDCl<sub>3</sub>) spectra of 3s.

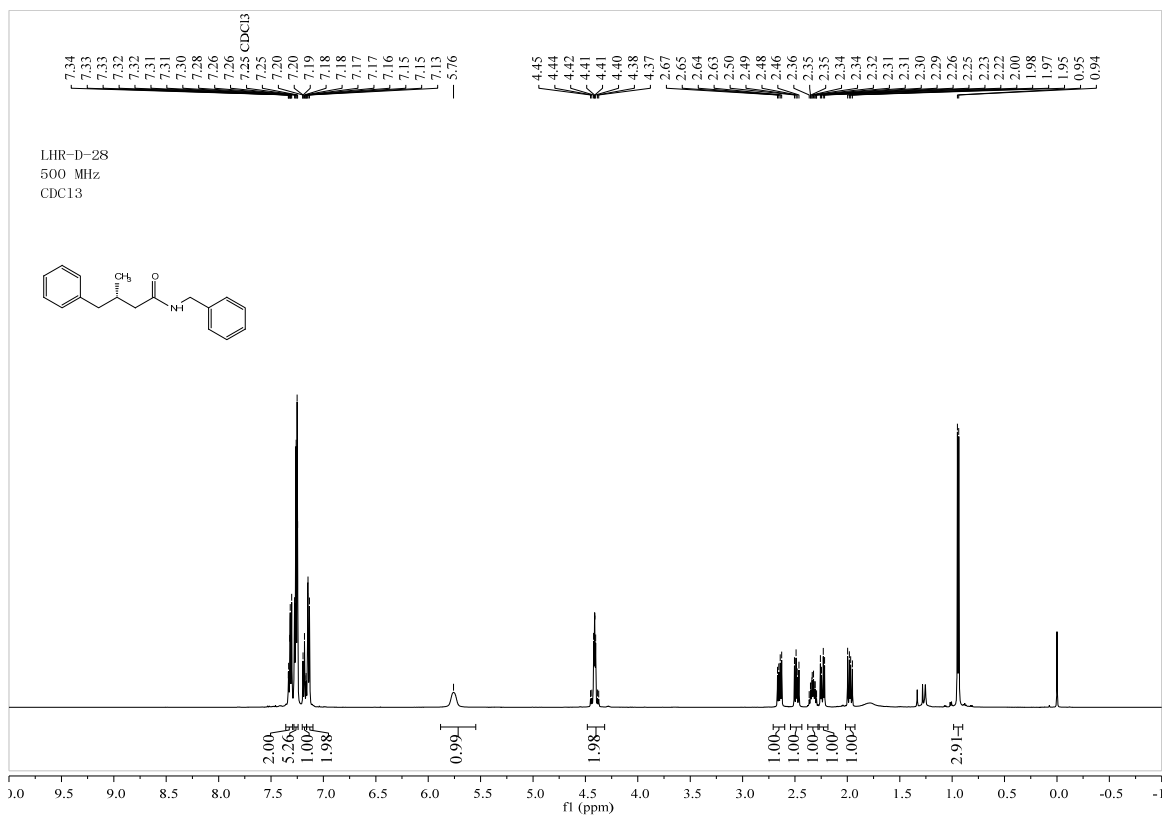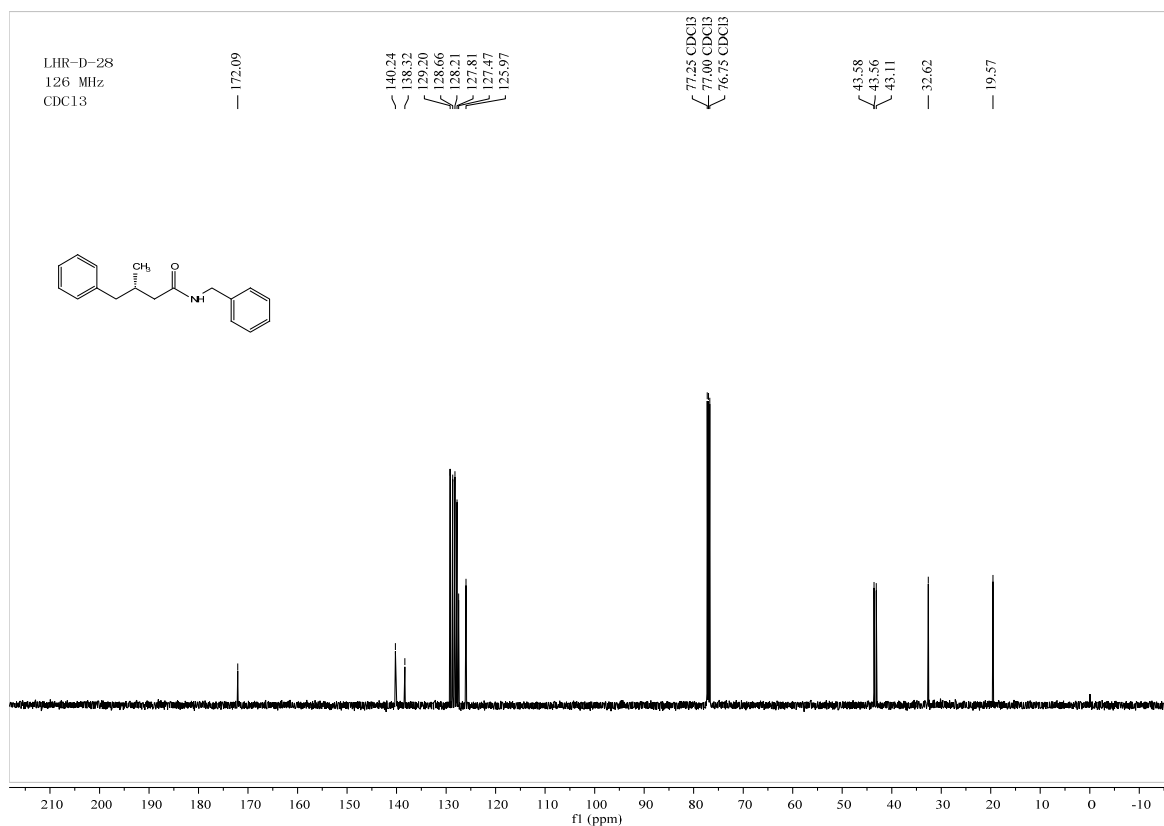

Figure S-34. <sup>1</sup>H NMR (500 MHz, CDCl<sub>3</sub>) and <sup>13</sup>C NMR (126 MHz, CDCl<sub>3</sub>) spectra of 3t.

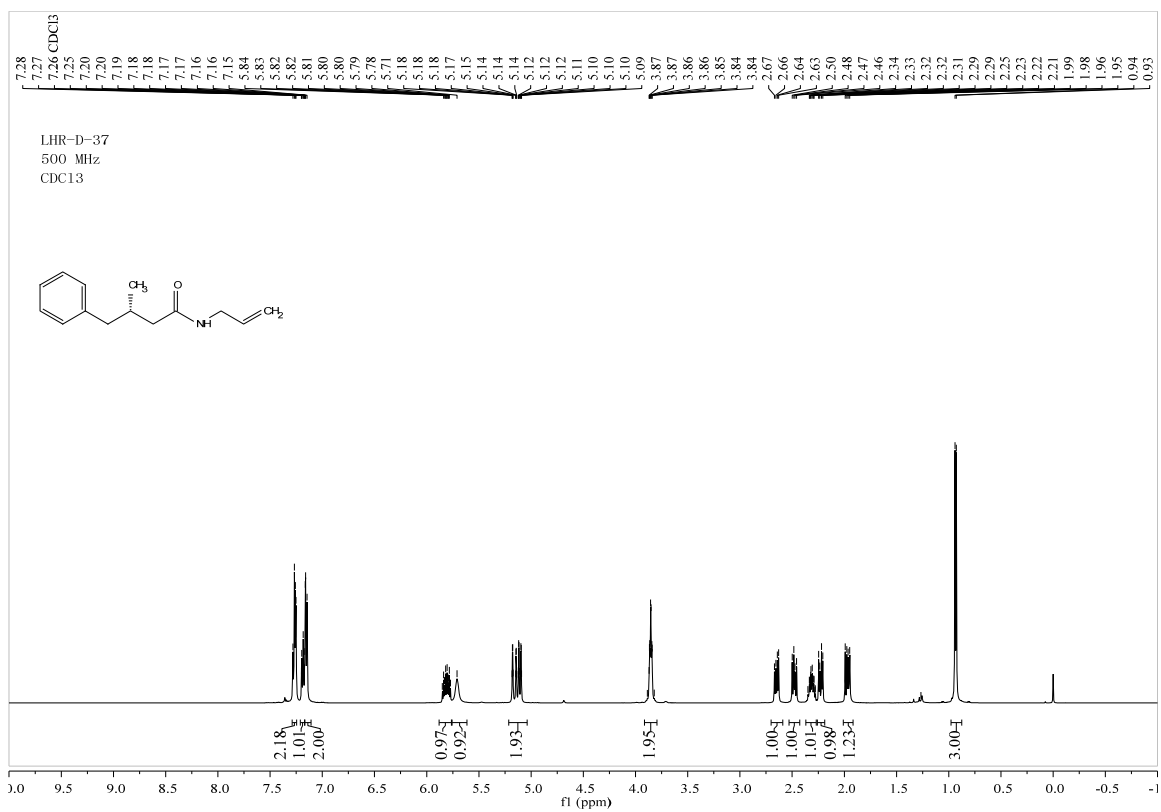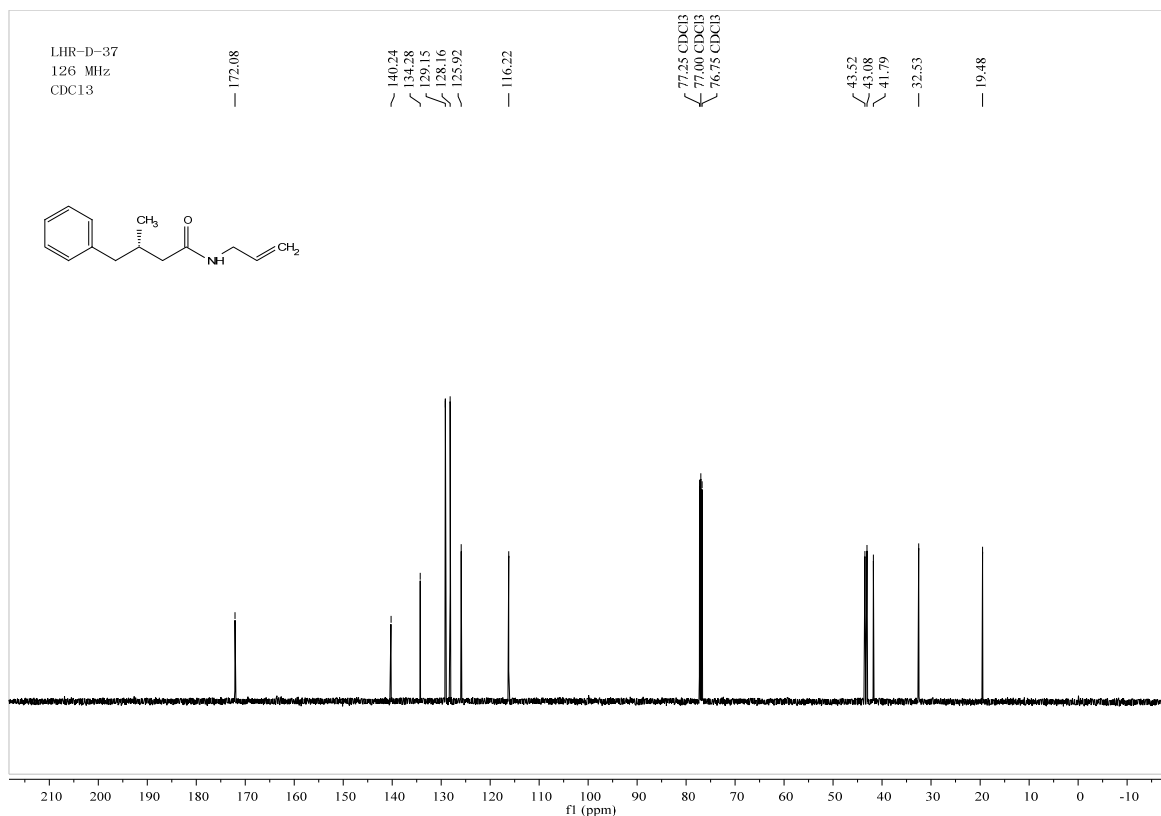

**Figure S-35.** <sup>1</sup>H NMR (500 MHz, CDCl<sub>3</sub>) and <sup>13</sup>C NMR (126 MHz, CDCl<sub>3</sub>) spectra of **3u**.

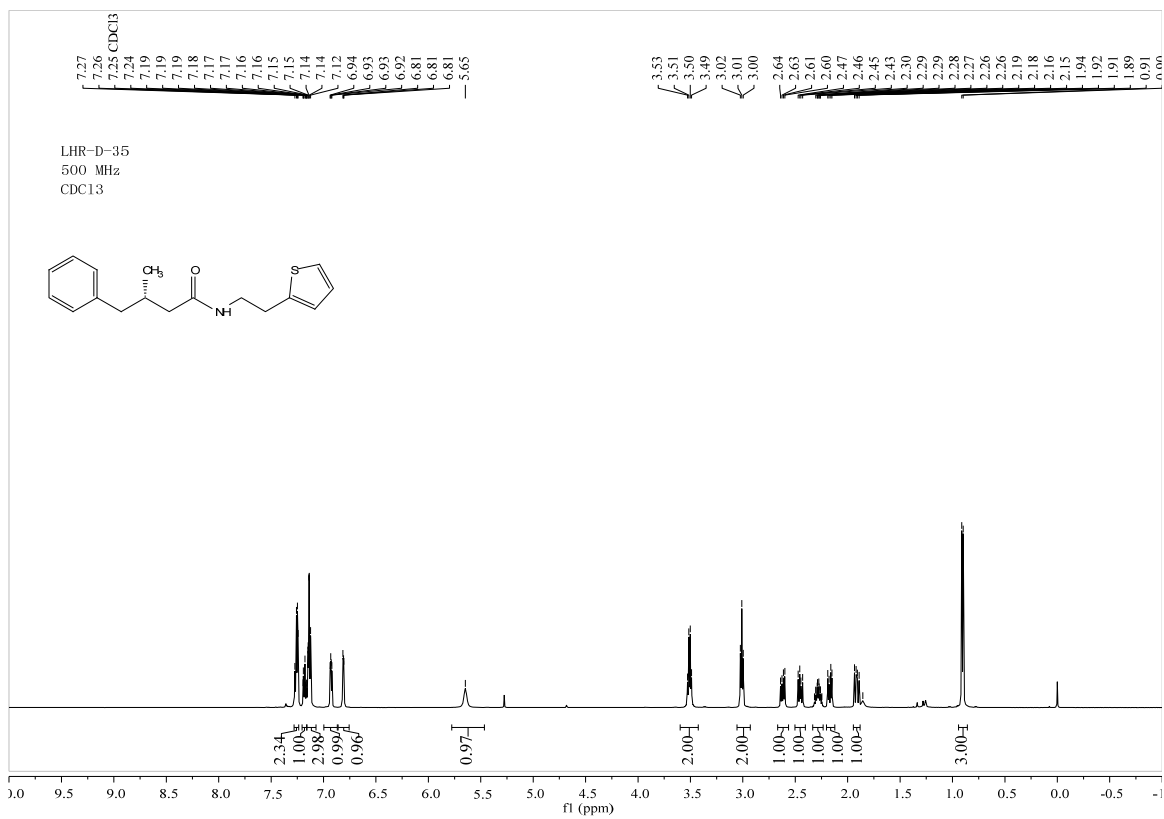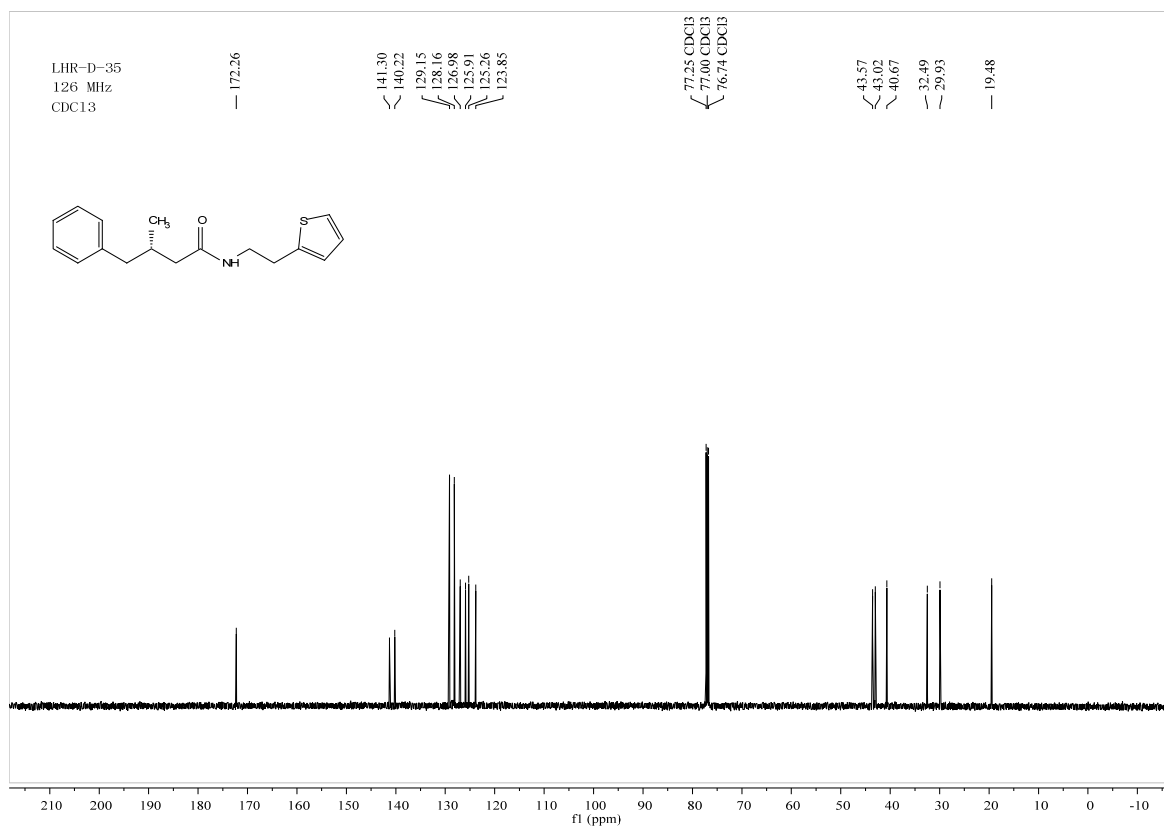

**Figure S-36.** <sup>1</sup>H NMR (500 MHz, CDCl<sub>3</sub>) and <sup>13</sup>C NMR (126 MHz, CDCl<sub>3</sub>) spectra of **3v**.



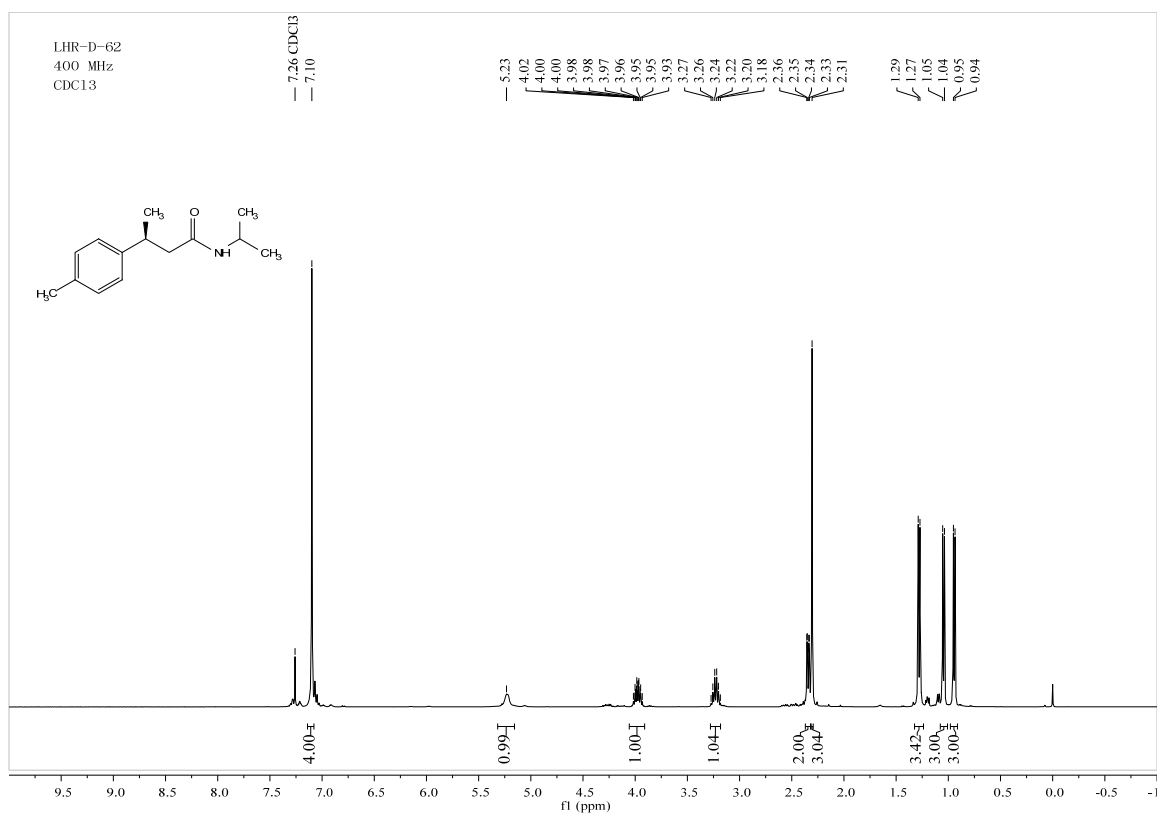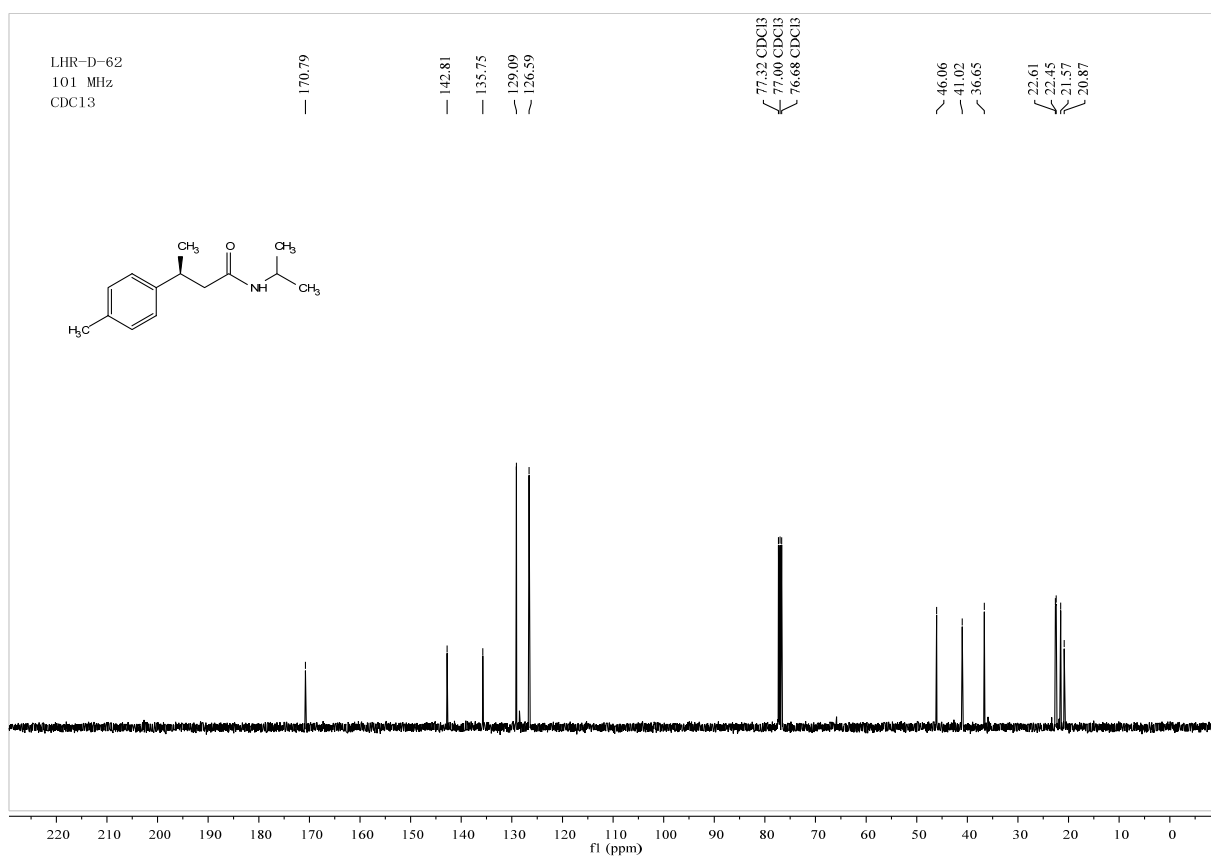

**Figure S-37.** <sup>1</sup>H NMR (400 MHz, CDCl<sub>3</sub>) and <sup>13</sup>C NMR (101 MHz, CDCl<sub>3</sub>) spectra of **3w**.

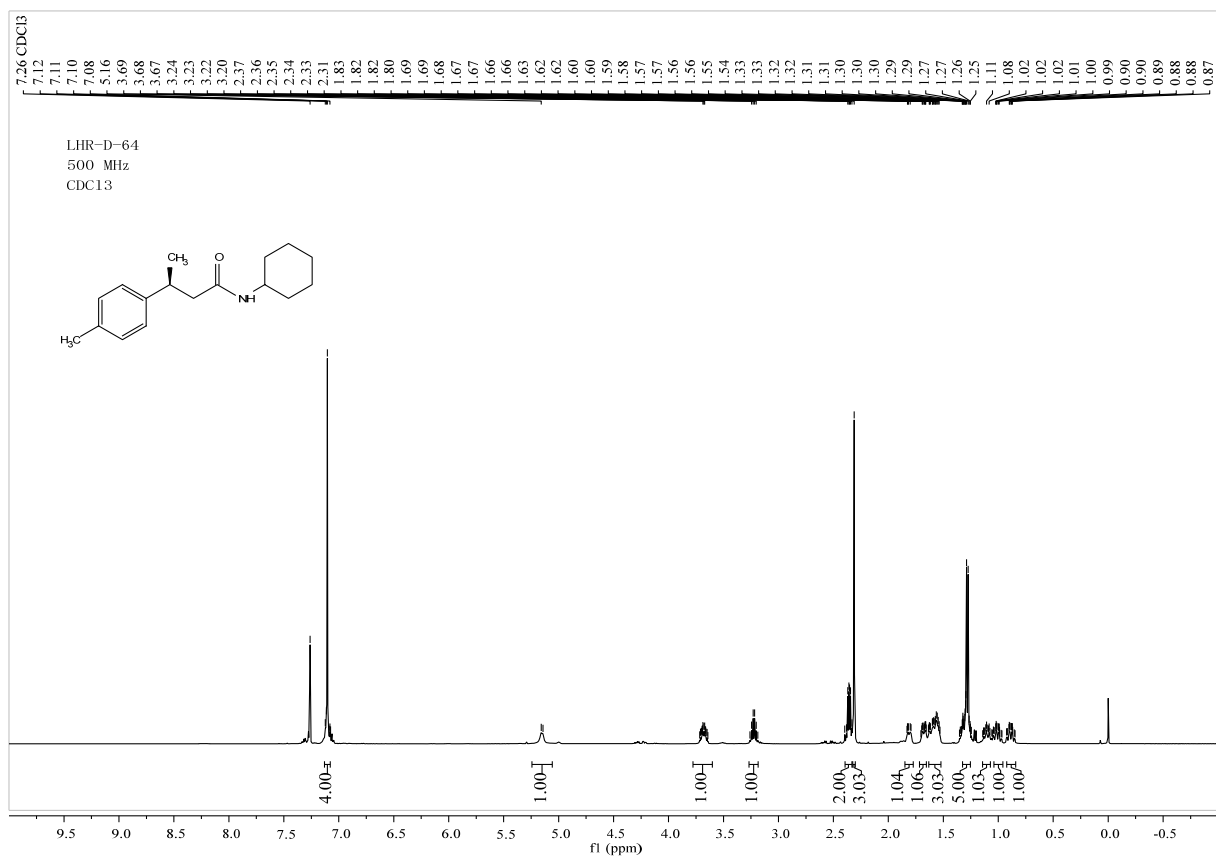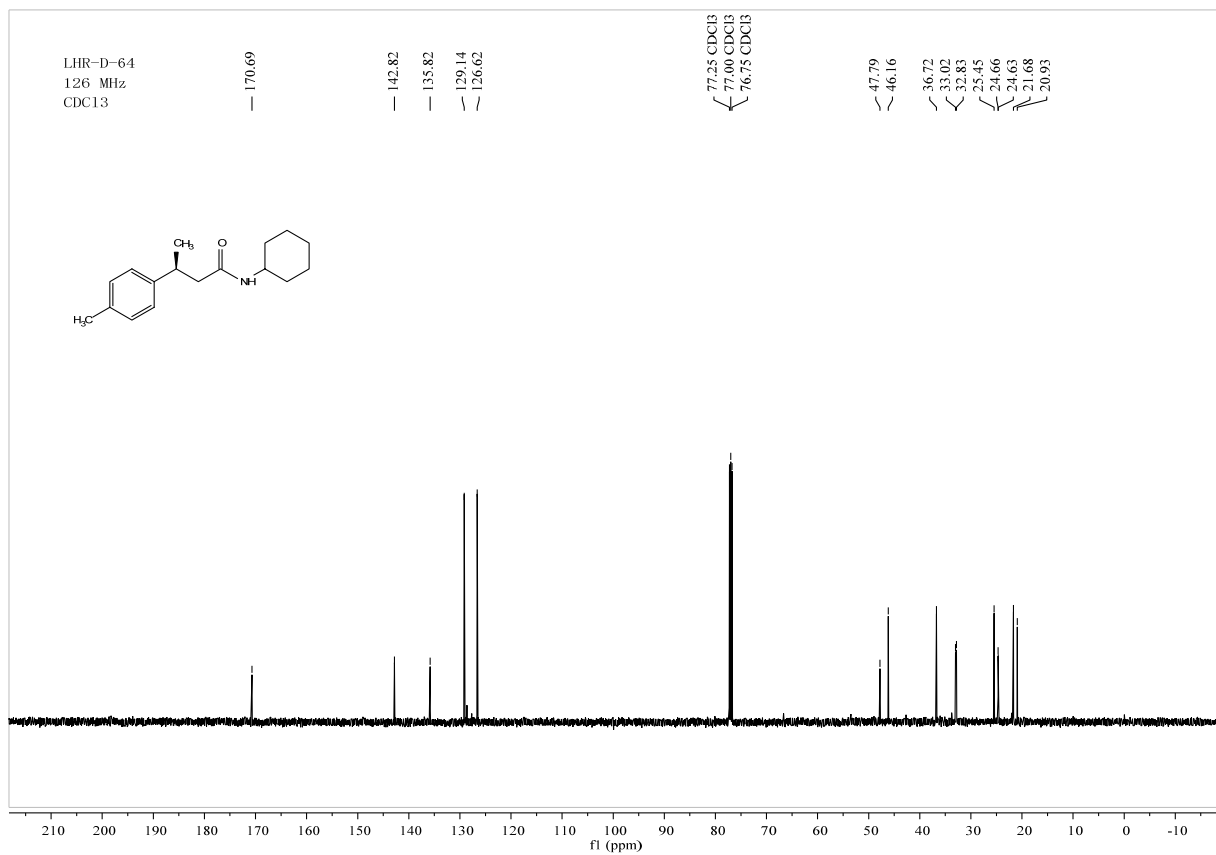

Figure S-38. <sup>1</sup>H NMR (500 MHz, CDCl<sub>3</sub>) and <sup>13</sup>C NMR (126 MHz, CDCl<sub>3</sub>) spectra of 3x.

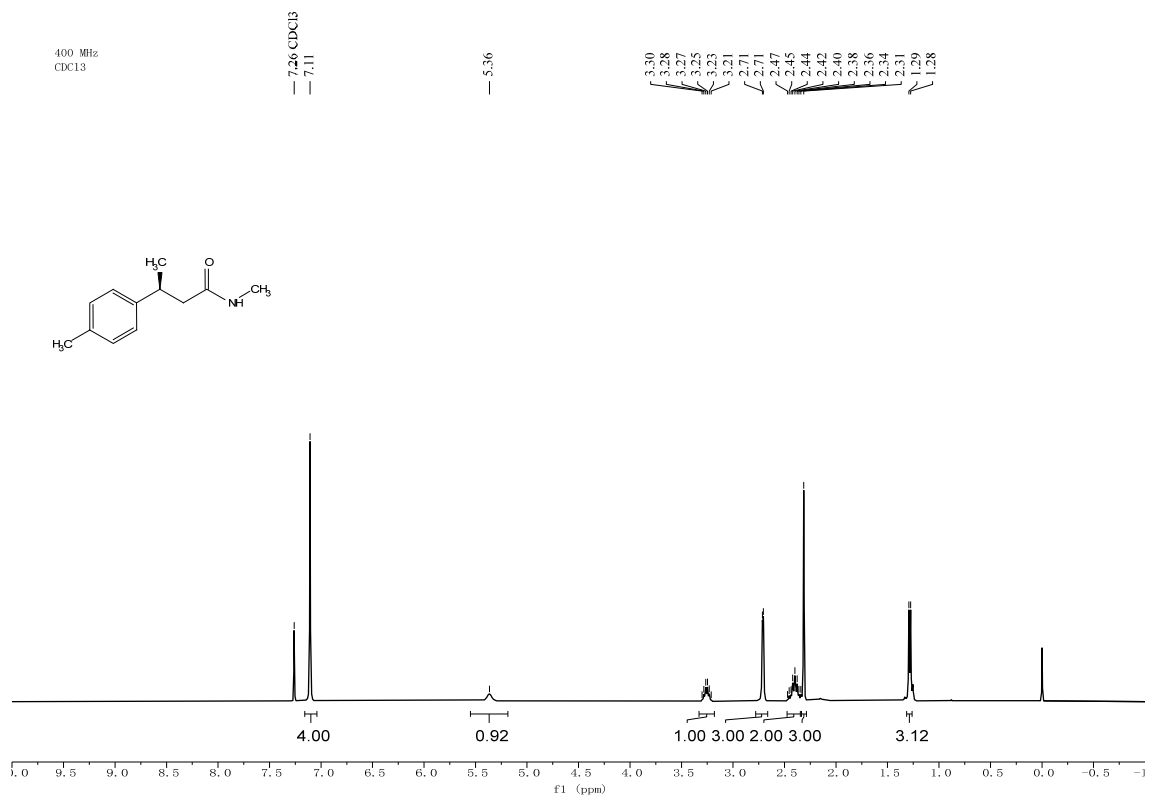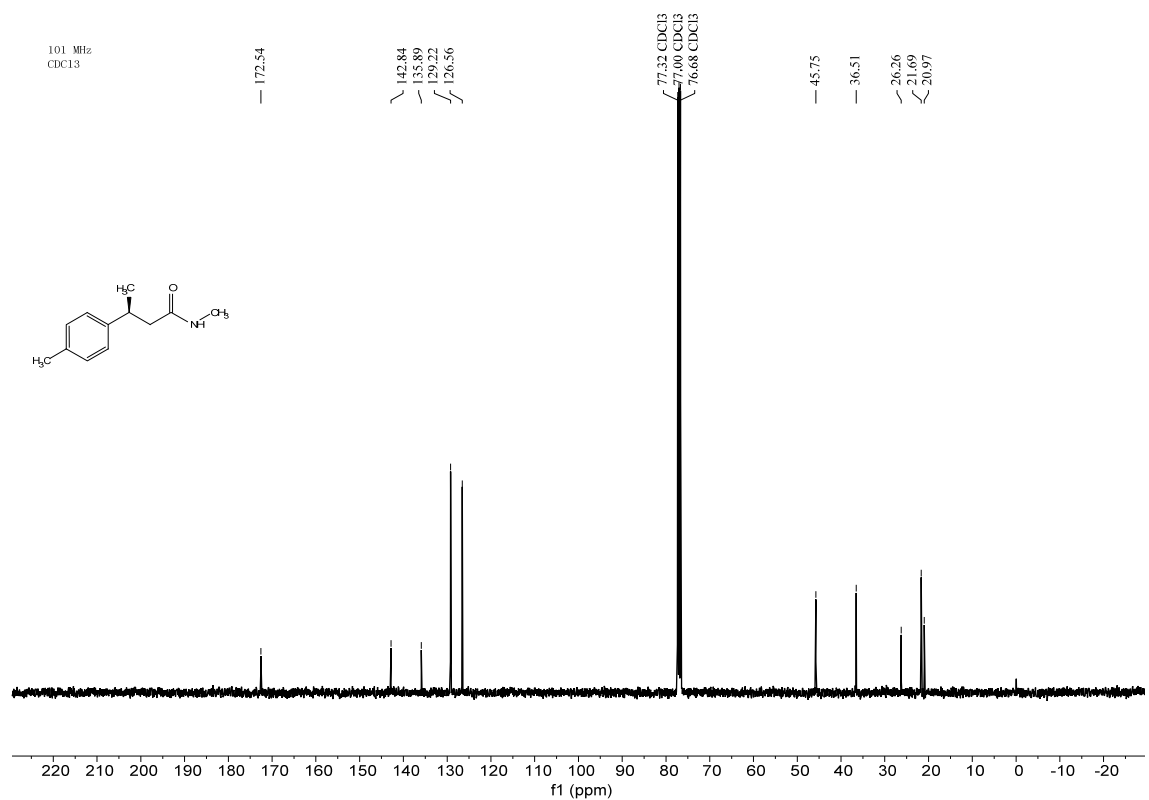

Figure S-39. <sup>1</sup>H NMR (400 MHz, CDCl<sub>3</sub>) and <sup>13</sup>C NMR (101 MHz, CDCl<sub>3</sub>) spectra of **3y**.

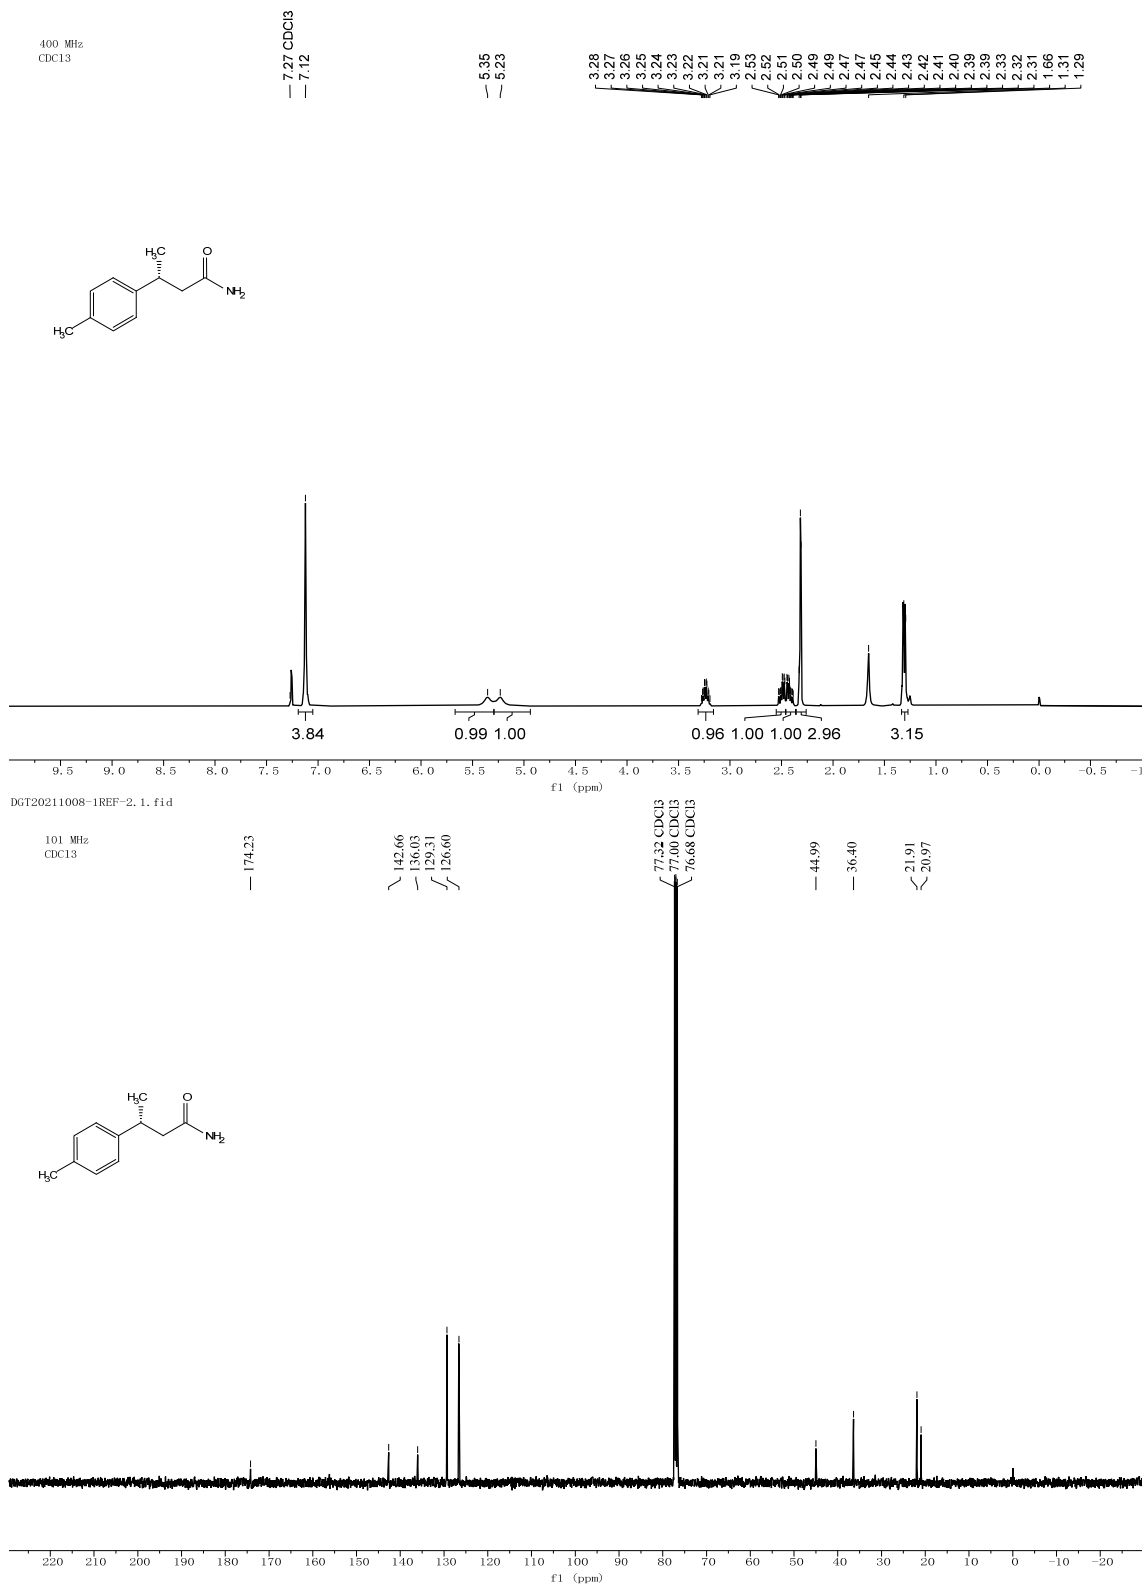

**Figure S-40.** <sup>1</sup>H NMR (400 MHz, CDCl<sub>3</sub>) and <sup>13</sup>C NMR (101 MHz, CDCl<sub>3</sub>) spectra of **3z**.

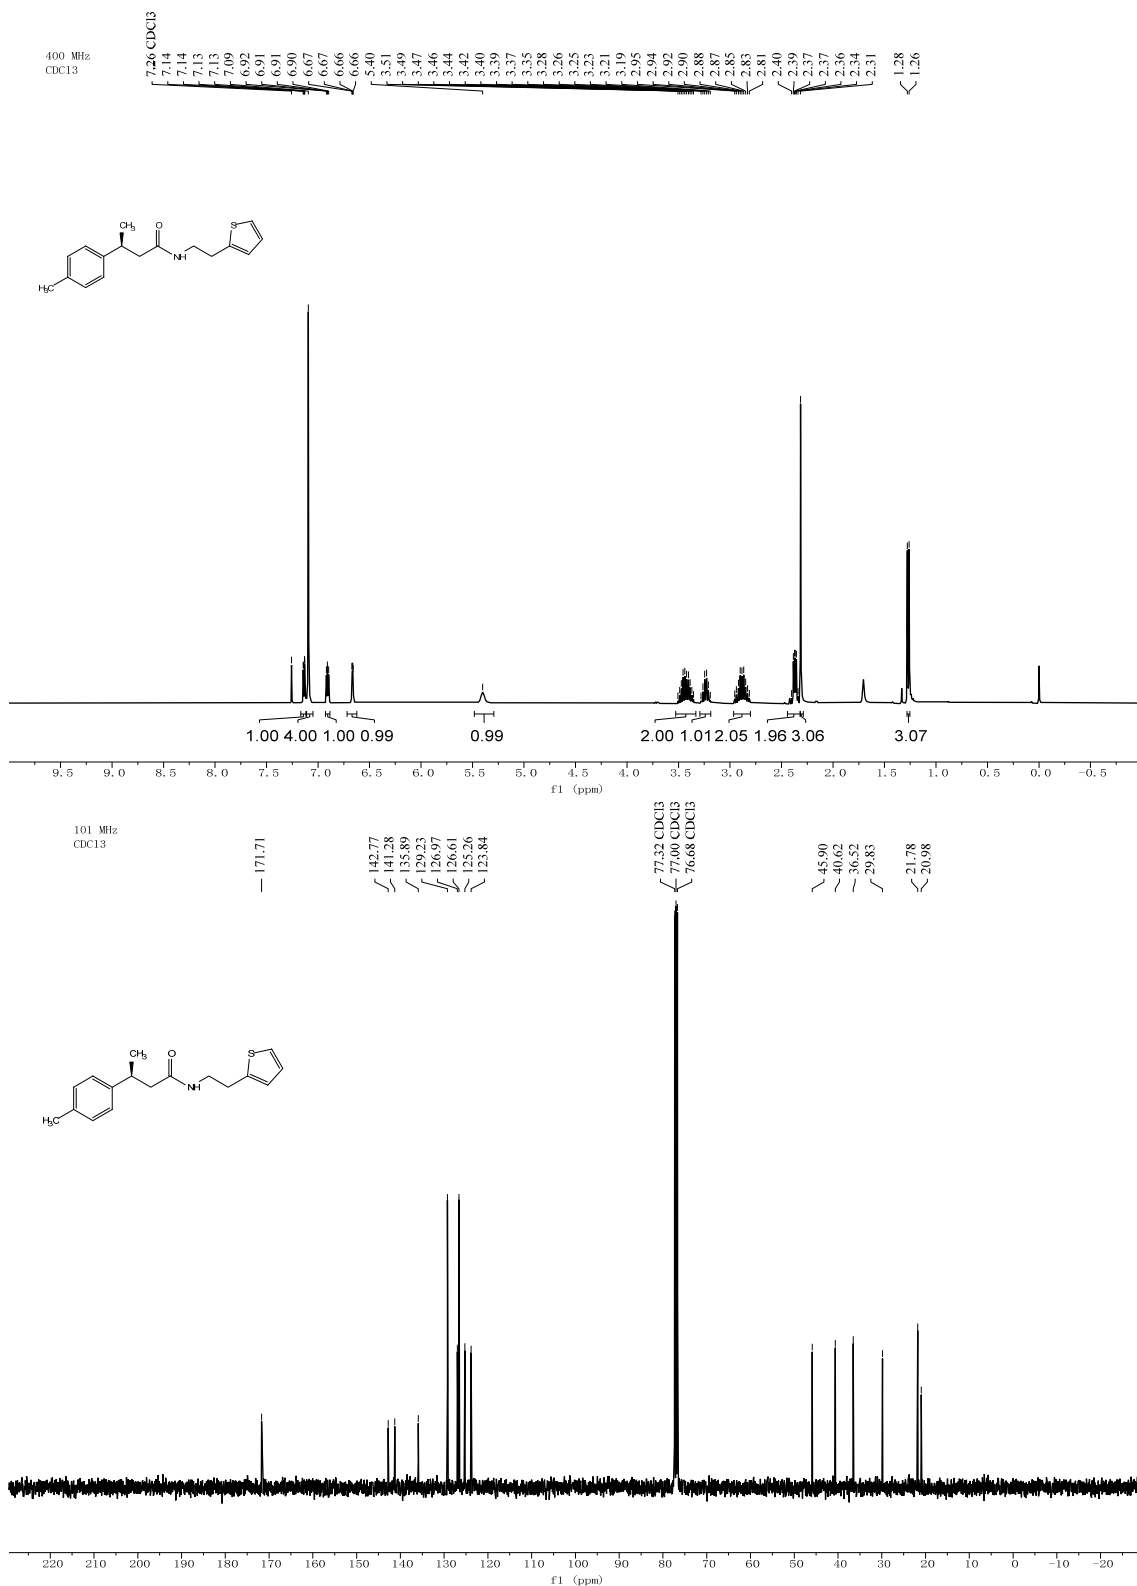

**Figure S-41.** <sup>1</sup>H NMR (400 MHz, CDCl<sub>3</sub>) and <sup>13</sup>C NMR (101 MHz, CDCl<sub>3</sub>) spectra of **3aa**.

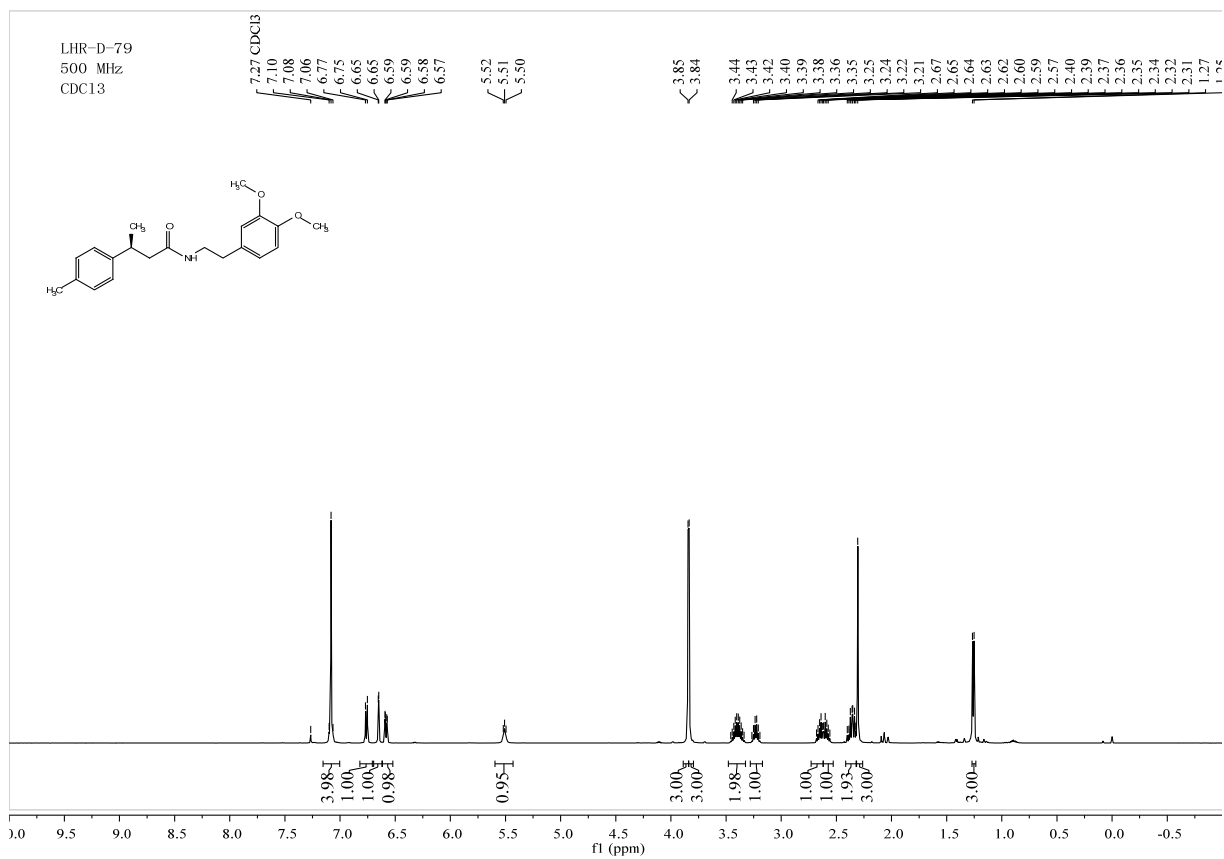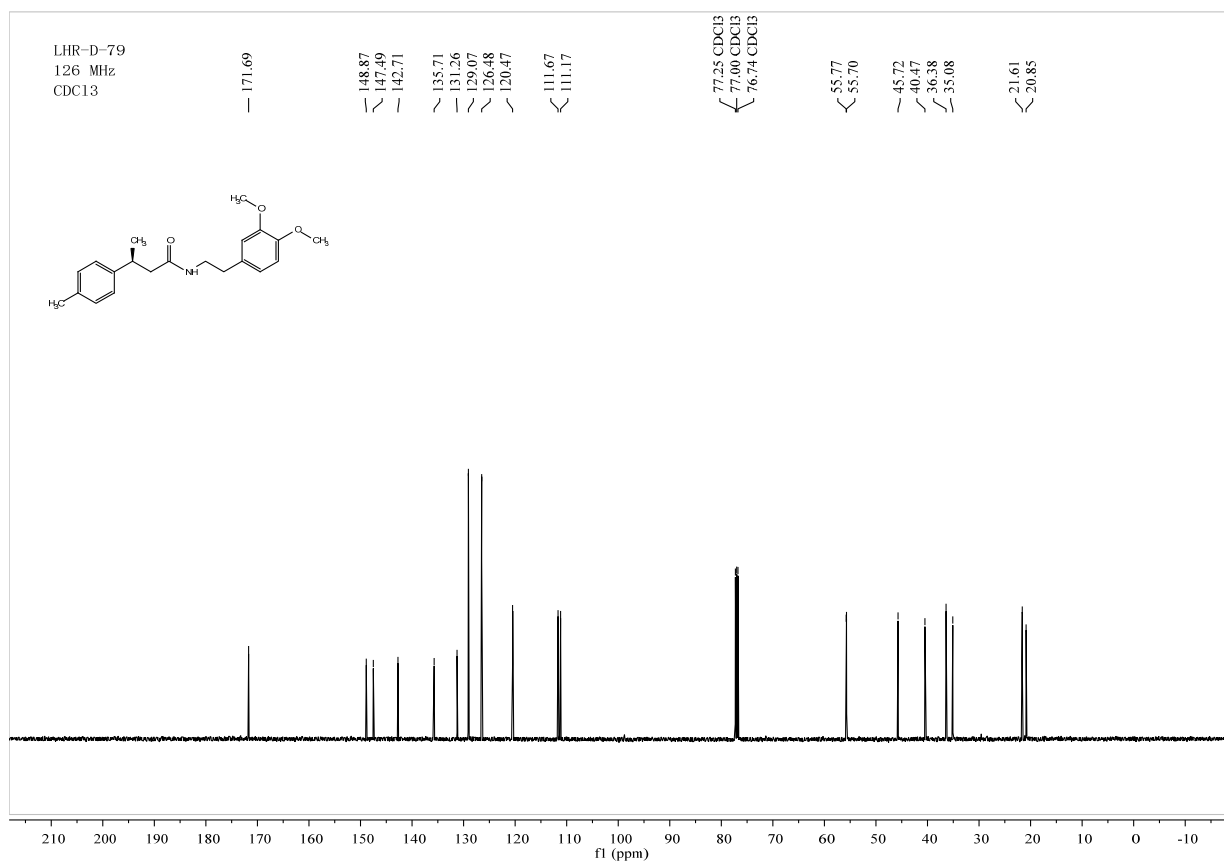

**Figure S-42.**  $^1\text{H}$  NMR (500 MHz,  $\text{CDCl}_3$ ) and  $^{13}\text{C}$  NMR (126 MHz,  $\text{CDCl}_3$ ) spectra of **3ab**.

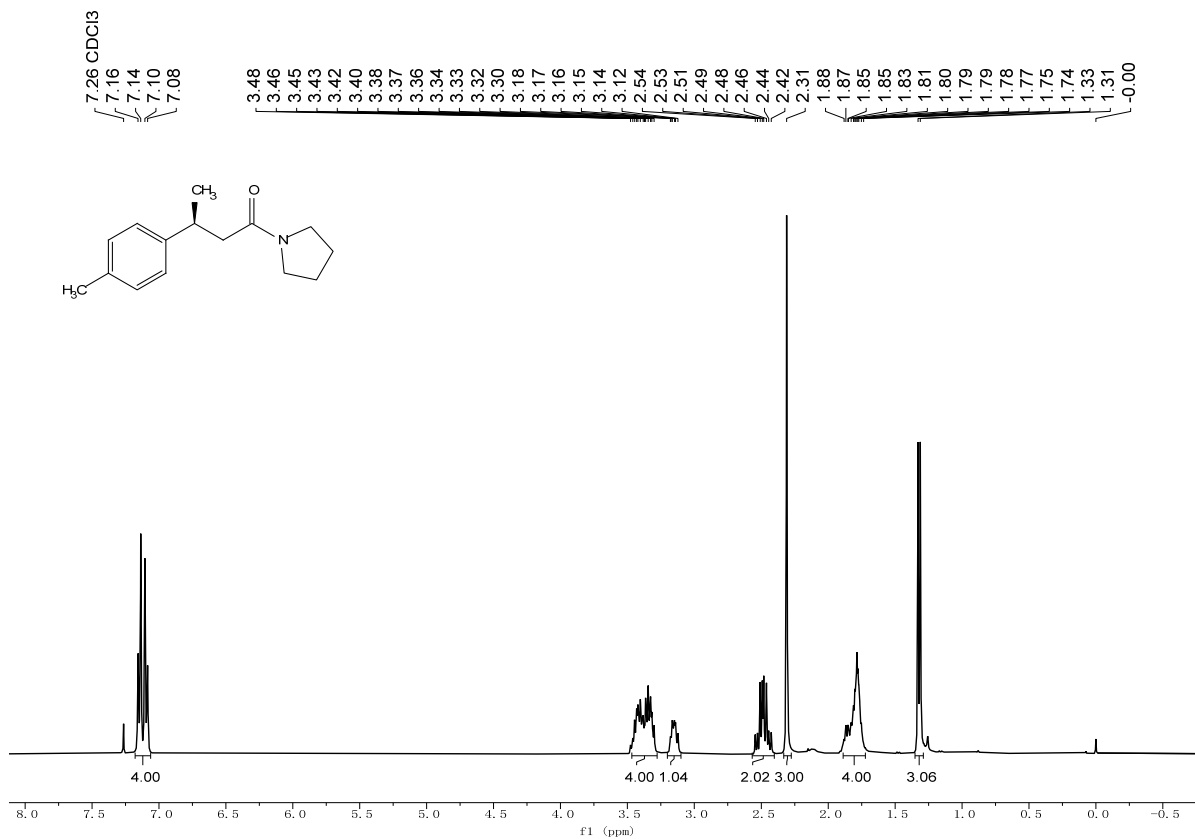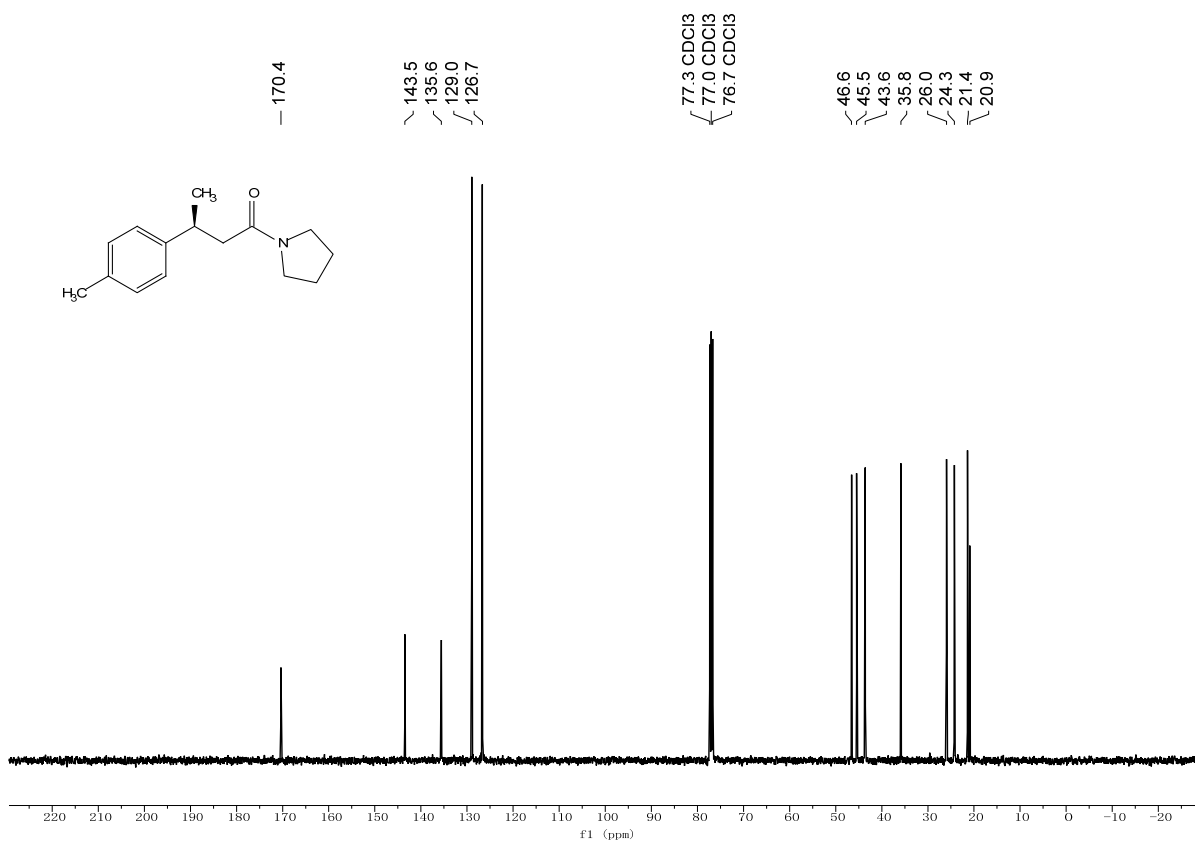

**Figure S-43.**  $^1\text{H}$  NMR (400 MHz,  $\text{CDCl}_3$ ) and  $^{13}\text{C}$  NMR (101 MHz,  $\text{CDCl}_3$ ) spectra of **3ad**.

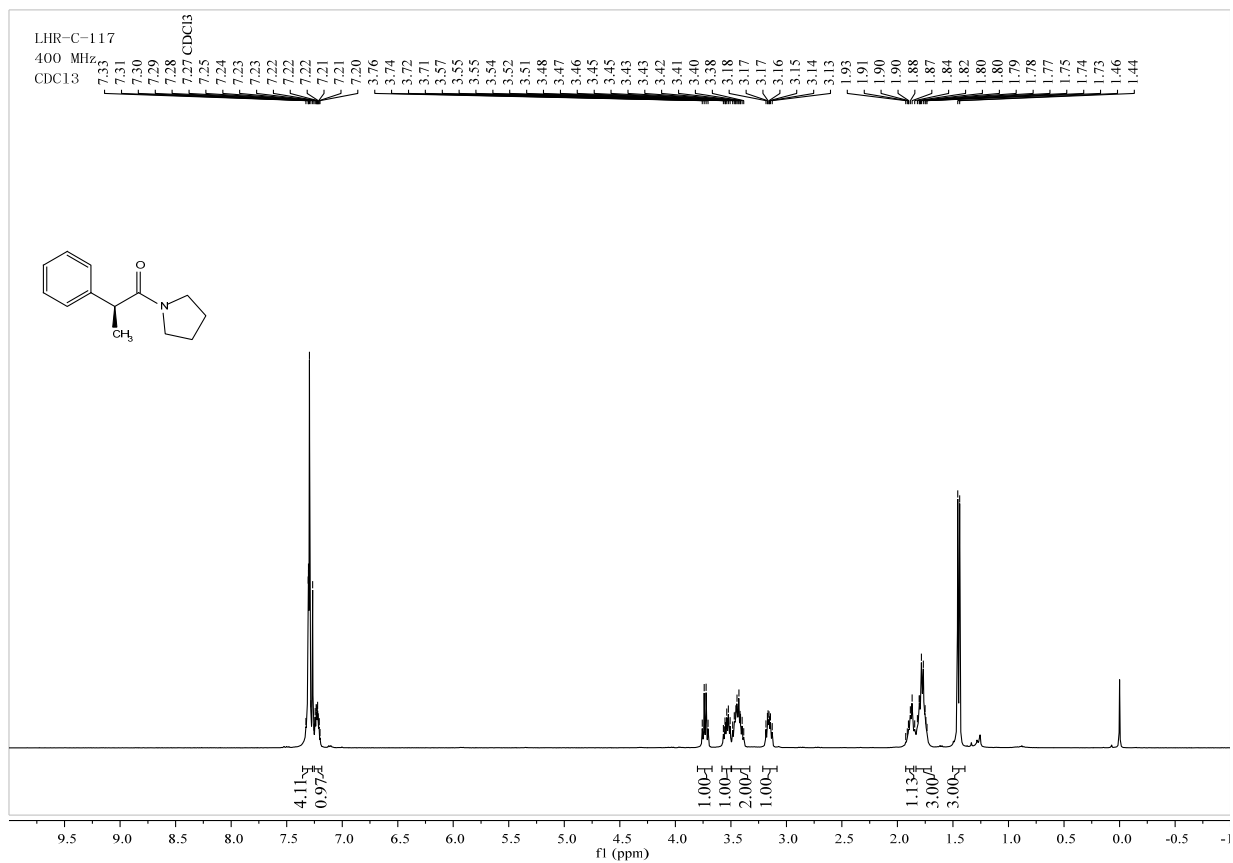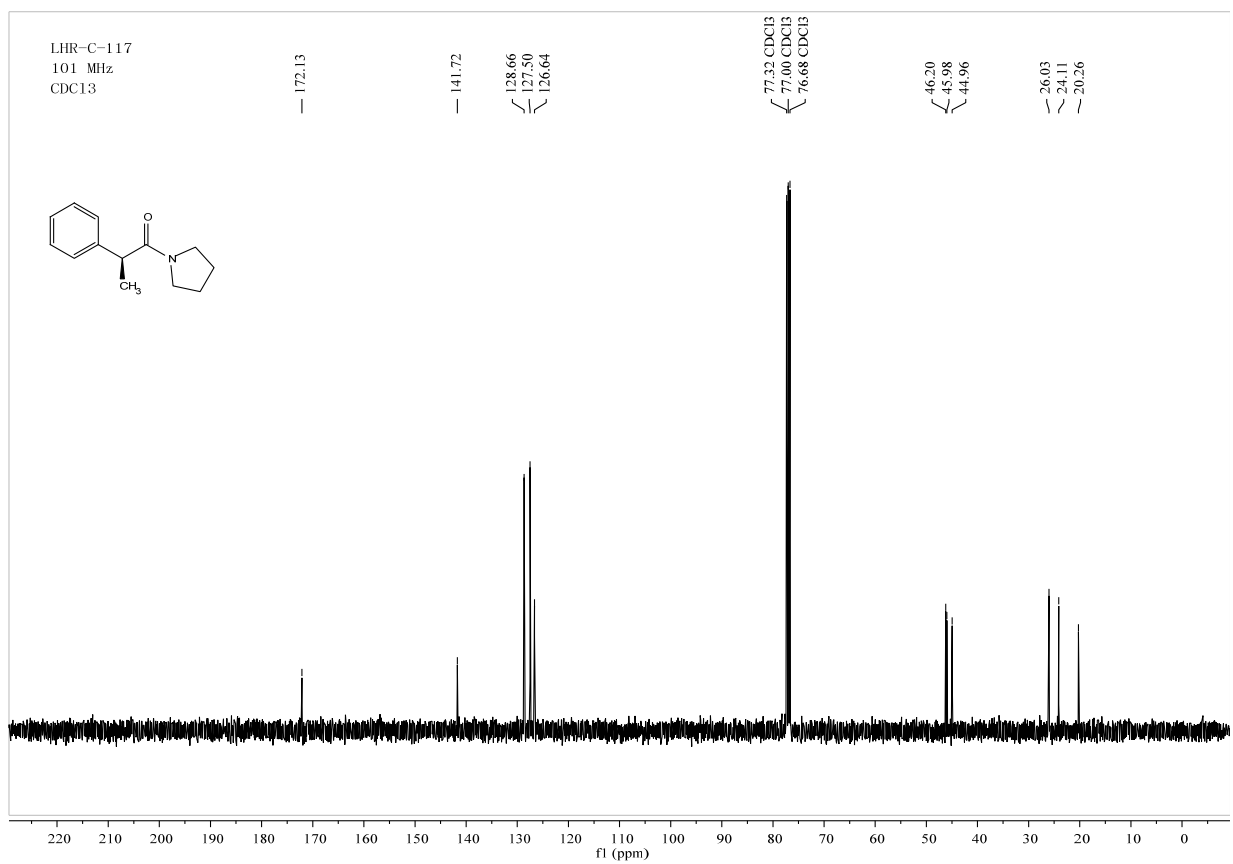

**Figure S-44.** <sup>1</sup>H NMR (400 MHz, CDCl<sub>3</sub>) and <sup>13</sup>C NMR (101 MHz, CDCl<sub>3</sub>) spectra of **3ae**.



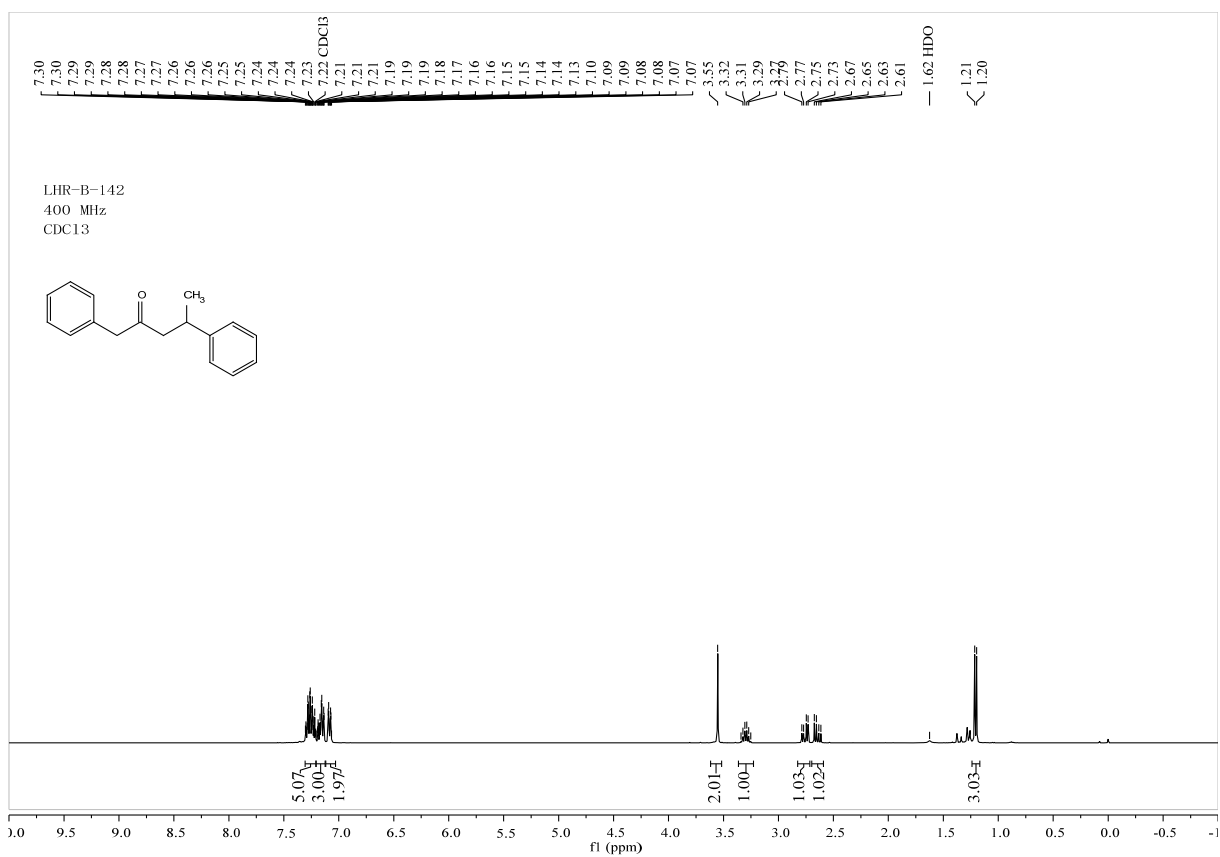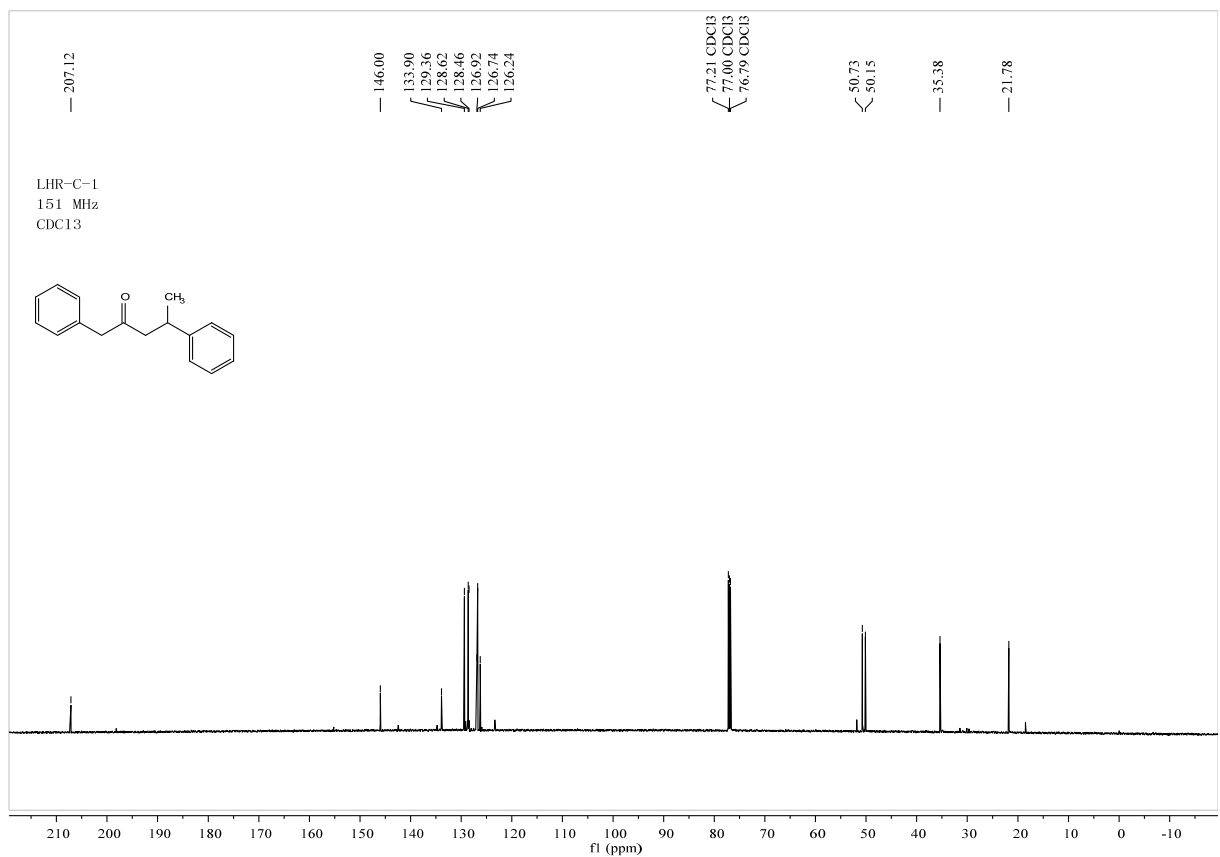

Figure S-45. <sup>1</sup>H NMR (400 MHz, CDCl<sub>3</sub>) and <sup>13</sup>C NMR (126 MHz, CDCl<sub>3</sub>) spectra of 4a.

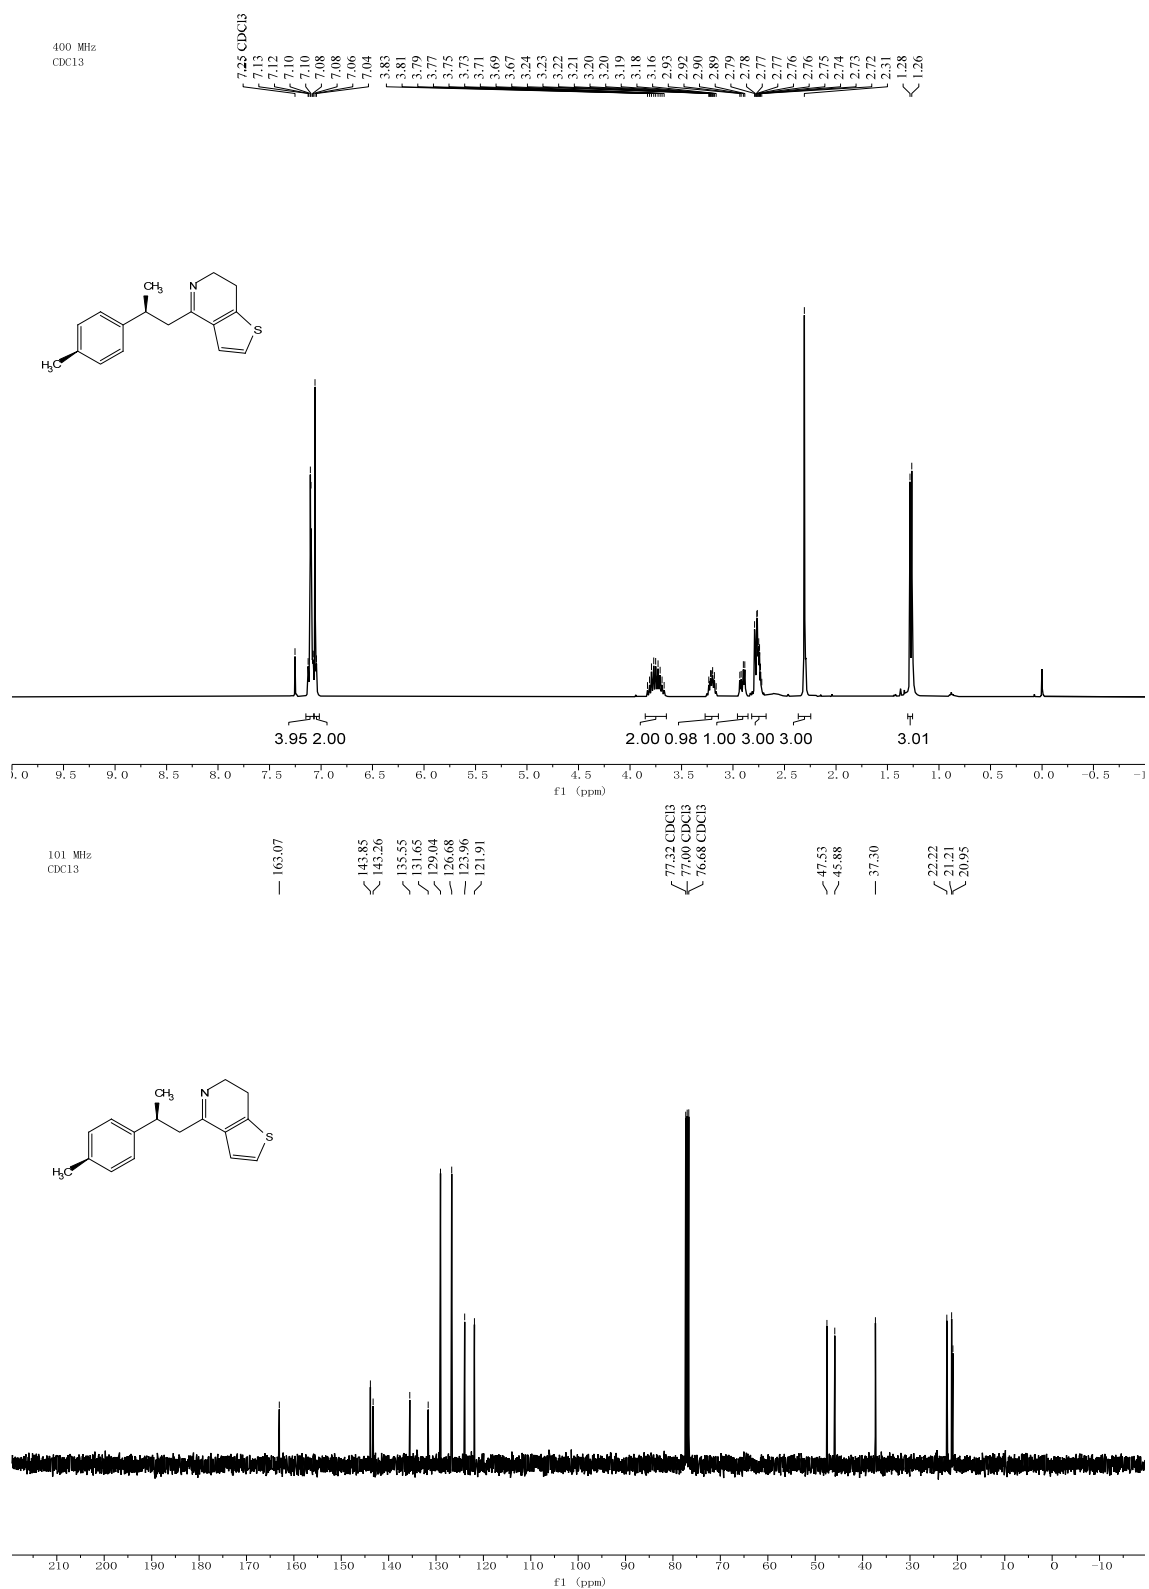

Figure S-46. <sup>1</sup>H NMR (400 MHz, CDCl<sub>3</sub>) and <sup>13</sup>C NMR (101 MHz, CDCl<sub>3</sub>) spectra of **4b**.

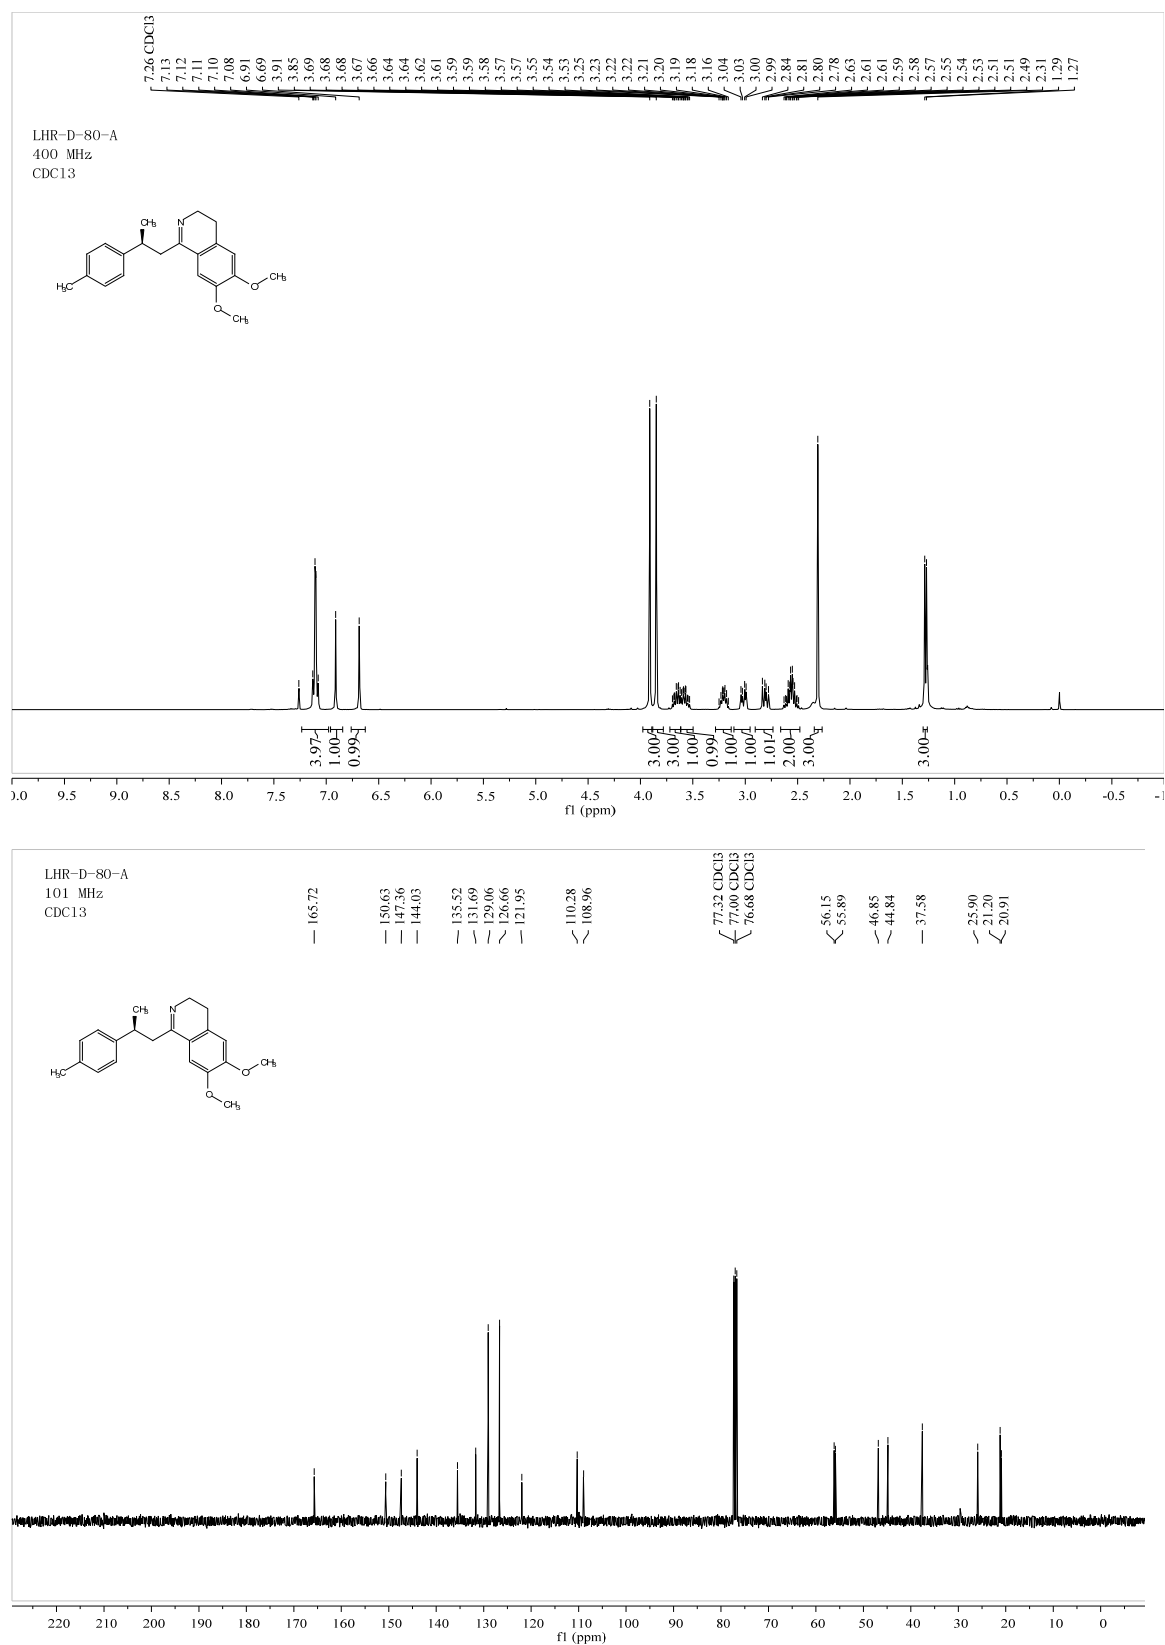

**Figure S-47.** <sup>1</sup>H NMR (400 MHz, CDCl<sub>3</sub>) and <sup>13</sup>C NMR (101 MHz, CDCl<sub>3</sub>) spectra of **4c**.

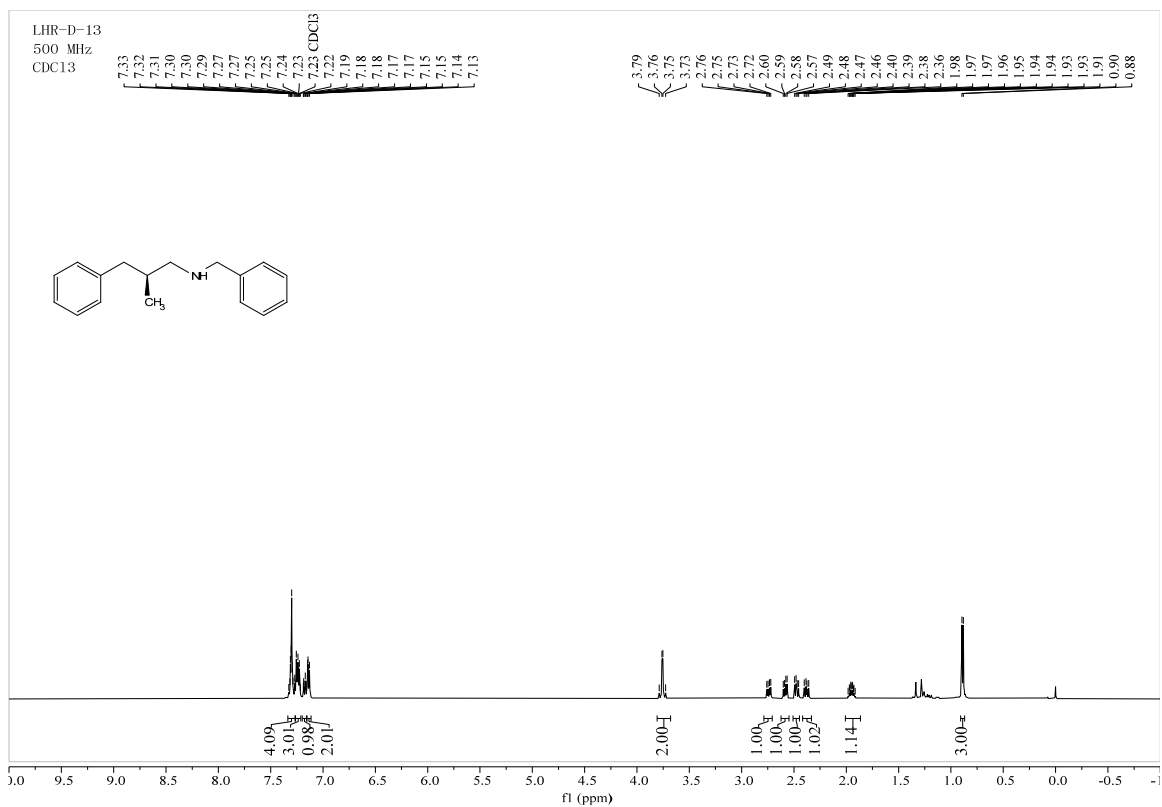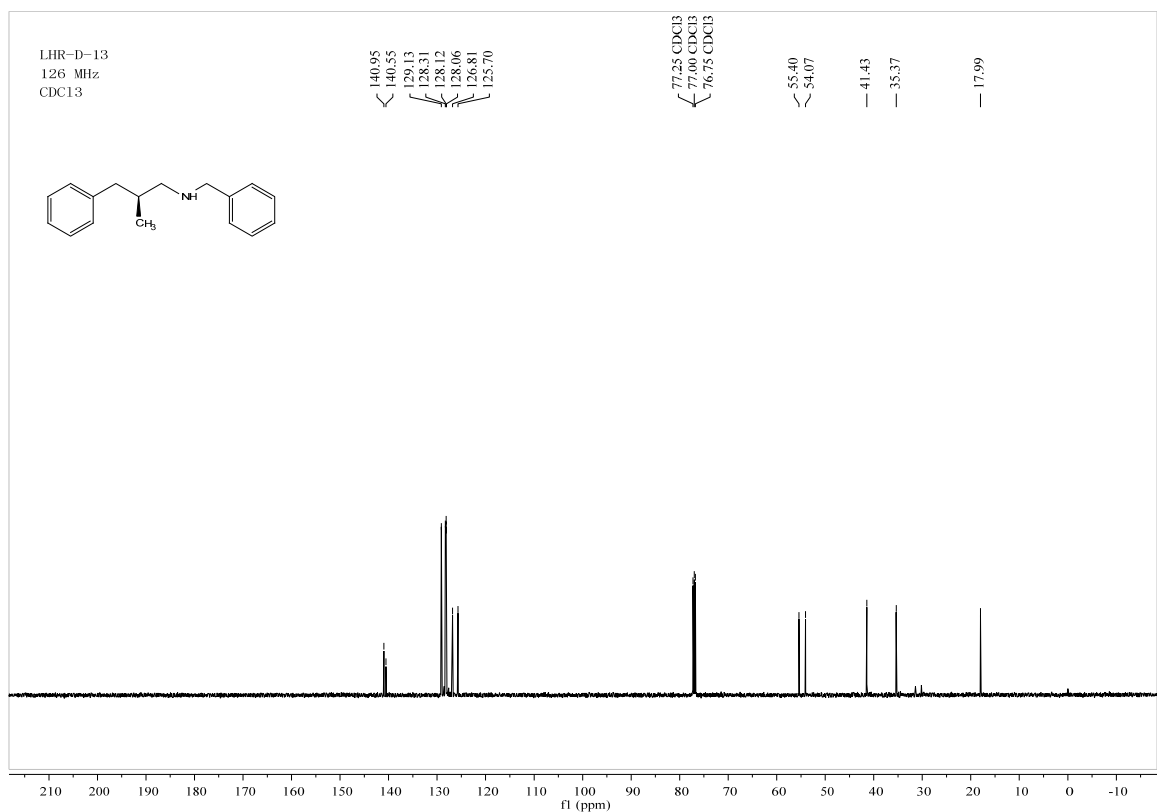

Figure S-48. <sup>1</sup>H NMR (500 MHz, CDCl<sub>3</sub>) and <sup>13</sup>C NMR (126 MHz, CDCl<sub>3</sub>) spectra of 4d.

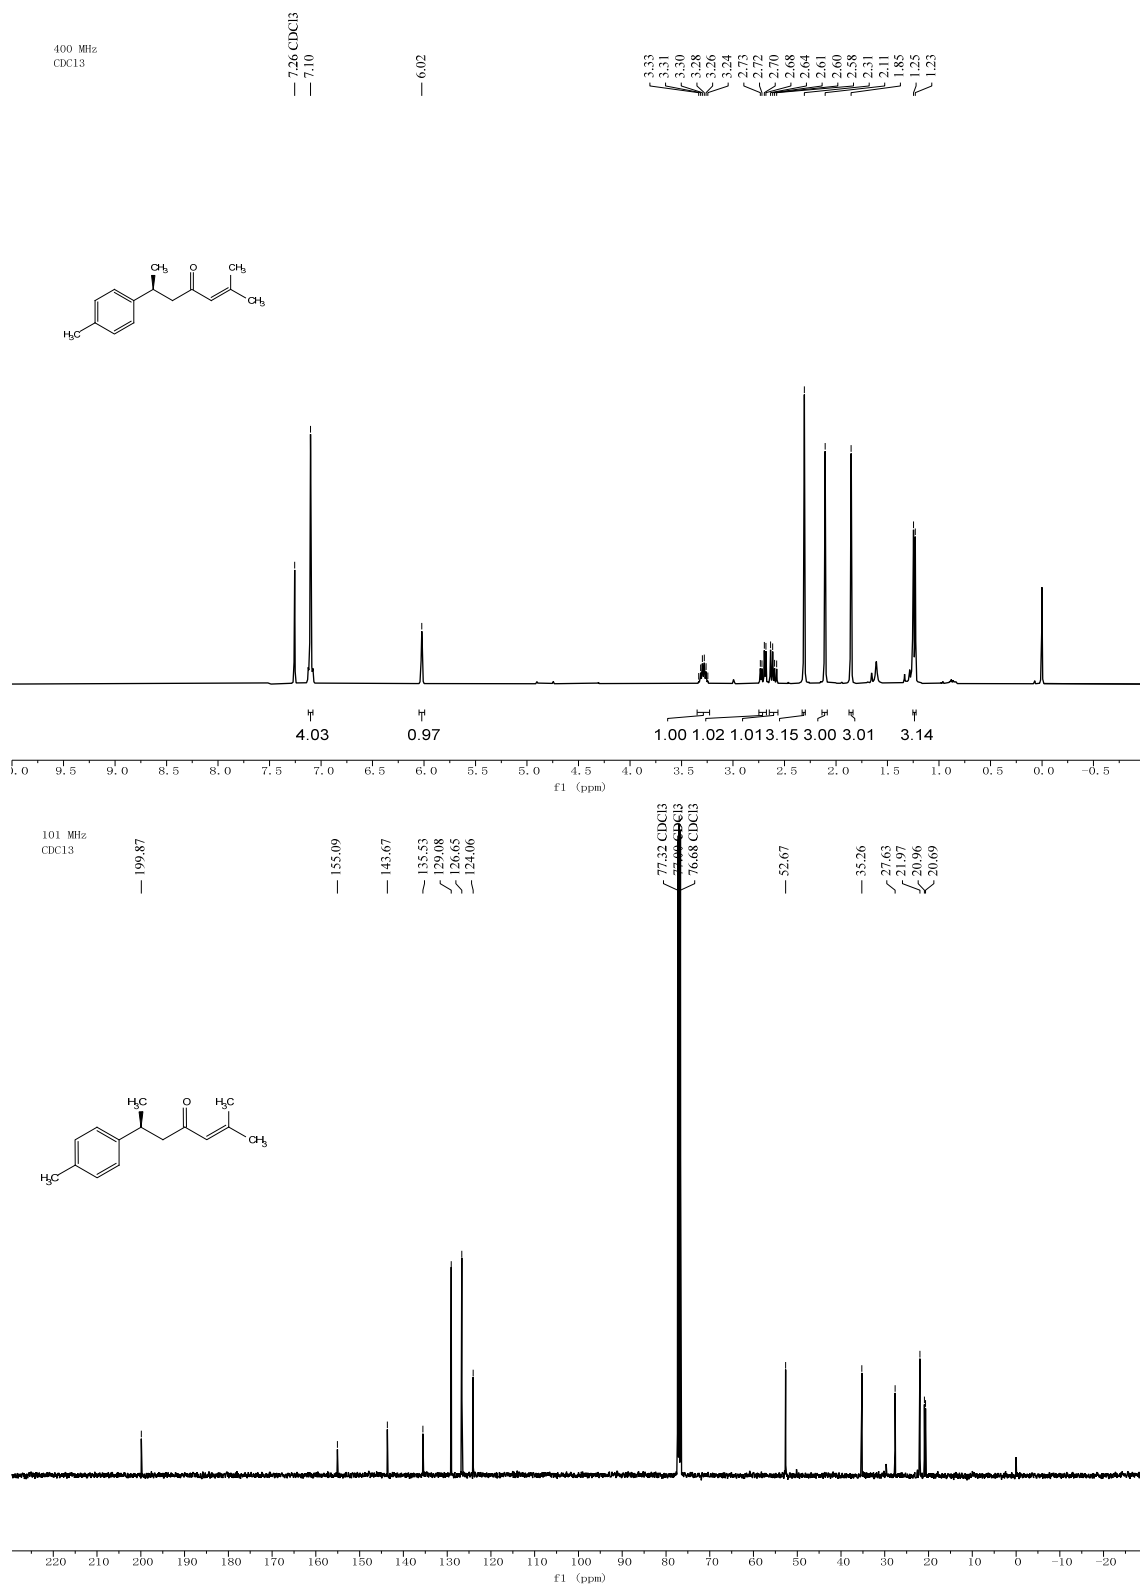

**Figure S-49.** <sup>1</sup>H NMR (400 MHz, CDCl<sub>3</sub>) and <sup>13</sup>C NMR (101 MHz, CDCl<sub>3</sub>) spectra of K-1.

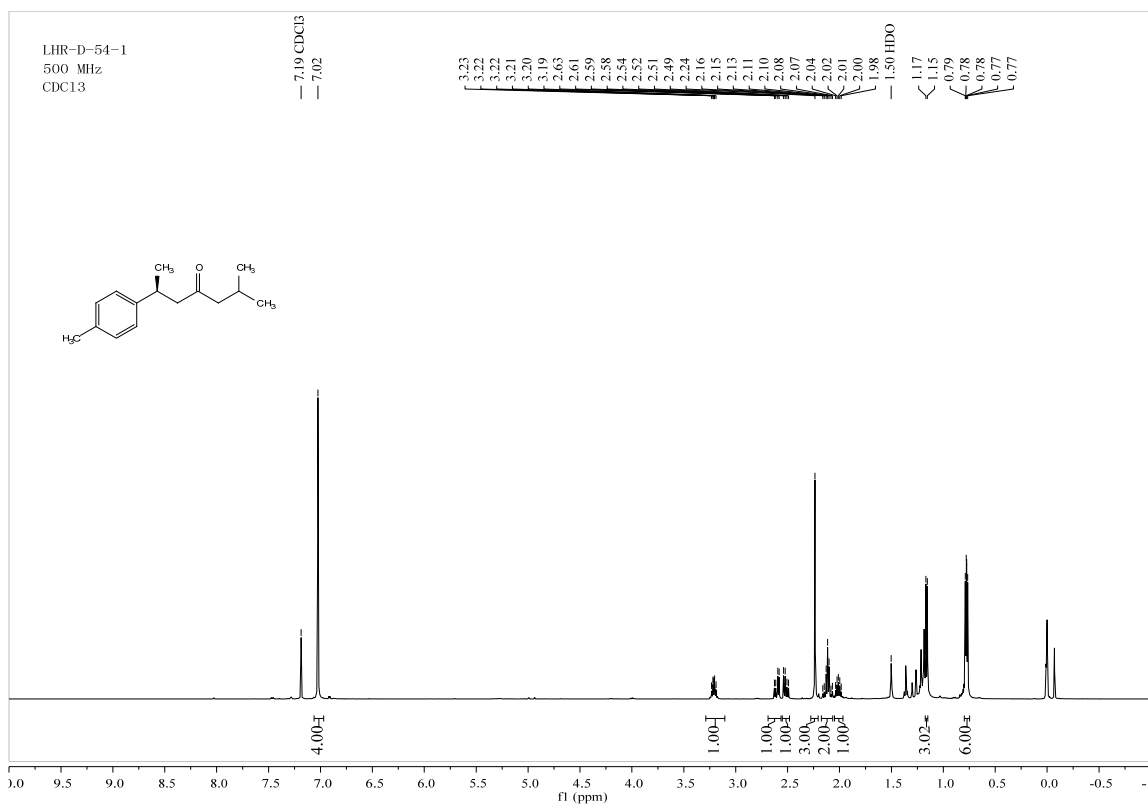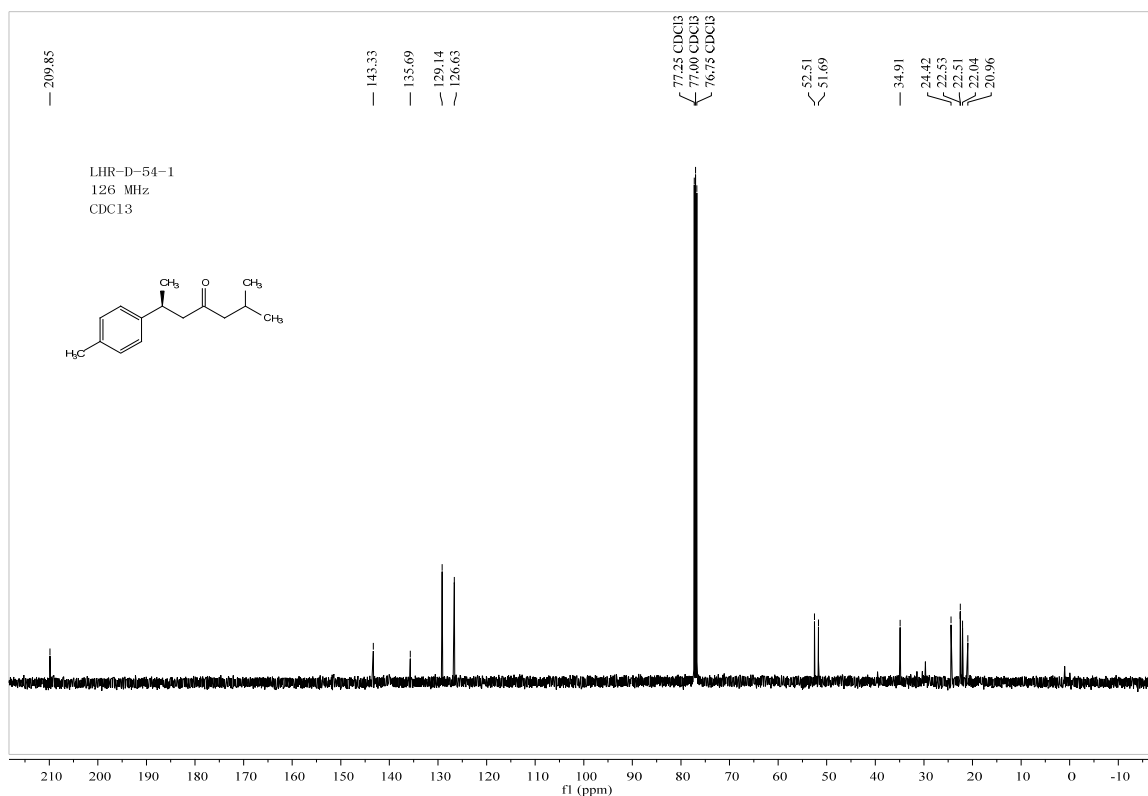

Figure S-50. <sup>1</sup>H NMR (500 MHz, CDCl<sub>3</sub>) and <sup>13</sup>C NMR (126 MHz, CDCl<sub>3</sub>) spectra of K-2.

## Determination of enantiomeric excess (*ee*) of the products by chiral HPLC

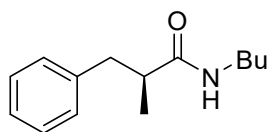

**3a**, 99% *ee*

### <Chromatogram>

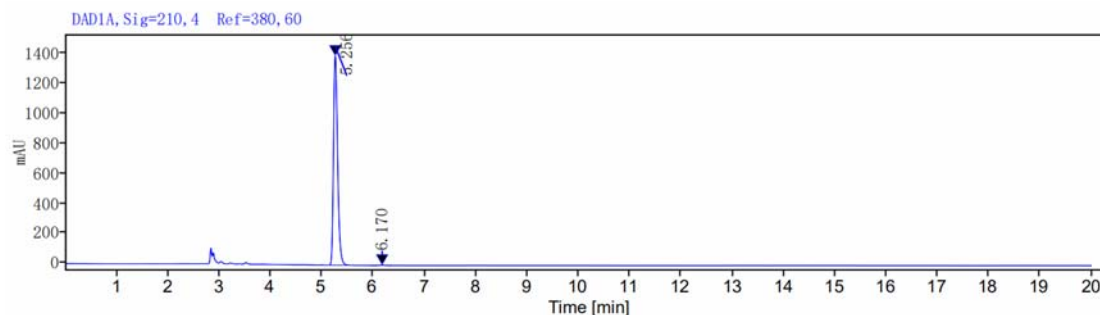

**Signal:** DAD1A, Sig=210, 4 Ref=380, 60

| RetTime [min] | Type | Width [min] | Area [mAU*s] | Height [mAU] | Area %  |
|---------------|------|-------------|--------------|--------------|---------|
| 5.256         | MV m | 0.72408     | 7743.28121   | 1393.79674   | 99.7202 |
| 6.170         | MM m | 0.40954     | 21.72783     | 3.07190      | 0.2798  |
| Totals        |      |             | 7765.00905   |              |         |

### <Chromatogram>

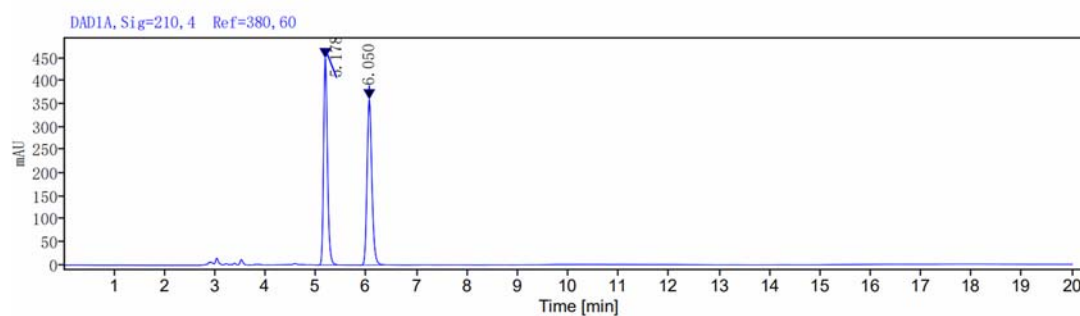

**Signal:** DAD1A, Sig=210, 4 Ref=380, 60

| RetTime [min] | Type | Width [min] | Area [mAU*s] | Height [mAU] | Area %  |
|---------------|------|-------------|--------------|--------------|---------|
| 5.178         | BV   | 0.41614     | 2392.98147   | 449.65936    | 49.9164 |
| 6.050         | BV   | 0.51080     | 2400.99479   | 359.90040    | 50.0836 |
| Totals        |      |             | 4793.97626   |              |         |

**Figure S-51.** HPLC Data of (*S*)-**3a** (from **2a**) and racemic **3a**

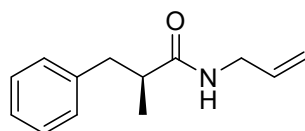

**3b**, 98% ee

<Chromatogram>

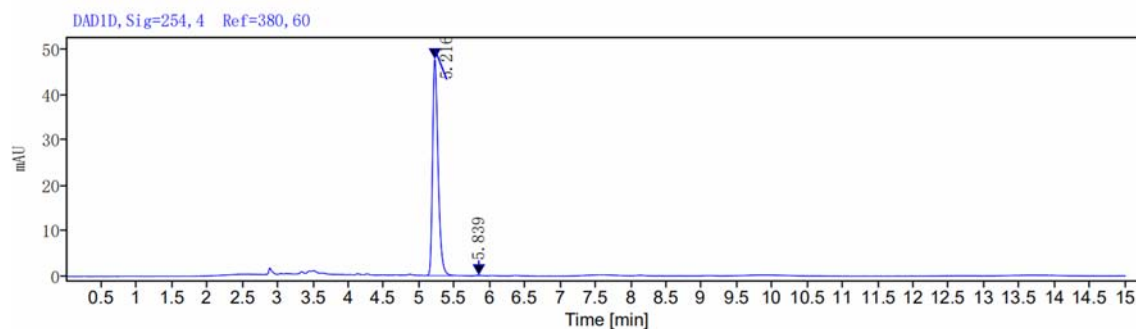

**Signal:** DAD1D, Sig=254, 4 Ref=380, 60

| RetTime [min] | Type | Width [min] | Area [mAU*s] | Height [mAU] | Area %  |
|---------------|------|-------------|--------------|--------------|---------|
| 5.216         | VV   | 0.37352     | 259.99705    | 47.76991     | 99.8221 |
| 5.839         | MM m | 0.18116     | 0.46342      | 0.10768      | 0.1779  |
| Totals        |      |             | 260.46047    |              |         |

<Chromatogram>

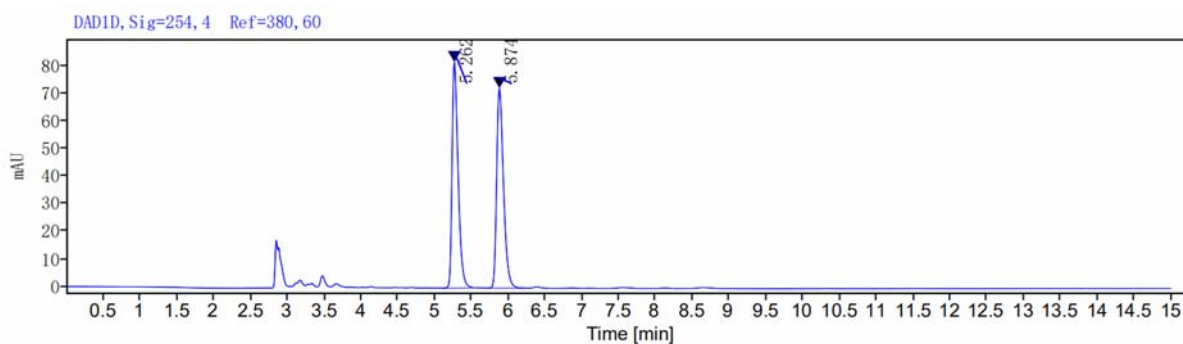

**Signal:** DAD1D, Sig=254, 4 Ref=380, 60

| RetTime [min] | Type | Width [min] | Area [mAU*s] | Height [mAU] | Area %  |
|---------------|------|-------------|--------------|--------------|---------|
| 5.262         | BV   | 0.42088     | 466.69096    | 81.86246     | 49.9223 |
| 5.874         | VV   | 0.44184     | 468.14343    | 72.43735     | 50.0777 |
| Totals        |      |             | 934.83440    |              |         |

**Figure S-52.** HPLC Data of (S)-3b (from 2a) and racemic 3b



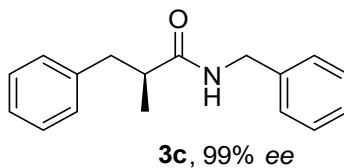

<Chromatogram>

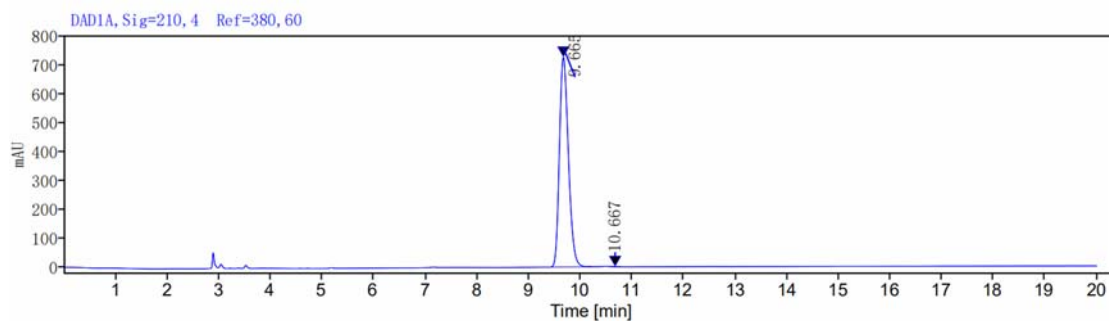

**Signal:** DAD1A, Sig=210, 4 Ref=380, 60

| RetTime [min] | Type | Width [min] | Area [mAU*s] | Height [mAU] | Area %  |
|---------------|------|-------------|--------------|--------------|---------|
| 9.665         | BV   | 0.83445     | 8820.10214   | 730.94057    | 99.9740 |
| 10.667        | MM n | 0.30033     | 2.29124      | 0.37485      | 0.0260  |
| Totals        |      |             | 8822.39337   |              |         |

<Chromatogram>

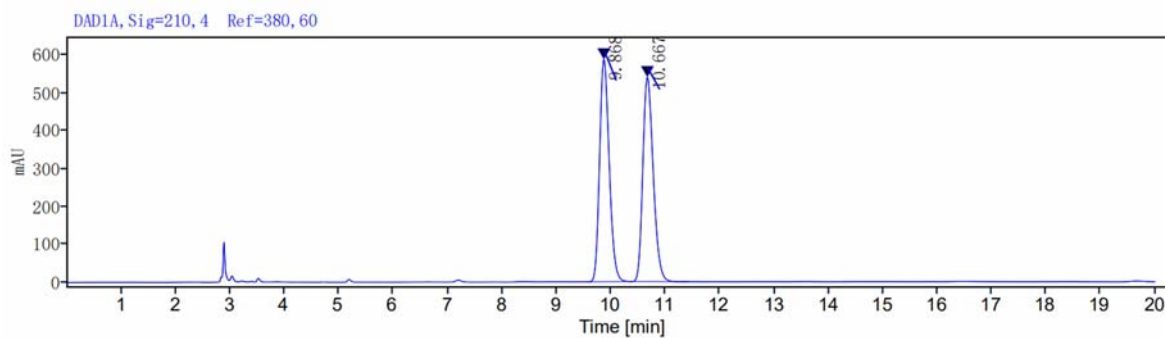

**Signal:** DAD1A, Sig=210, 4 Ref=380, 60

| RetTime [min] | Type | Width [min] | Area [mAU*s] | Height [mAU] | Area %  |
|---------------|------|-------------|--------------|--------------|---------|
| 9.868         | VB   | 0.79105     | 7207.21482   | 587.13319    | 50.0265 |
| 10.667        | BV   | 1.04987     | 7199.58892   | 539.74531    | 49.9735 |
| Totals        |      |             | 14406.80374  |              |         |

**Figure S-53.** HPLC Data of (S)-**3c** (from **2a**) and racemic **3c**

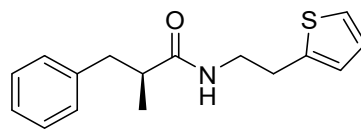

**3d**, 99% ee

<Chromatogram>

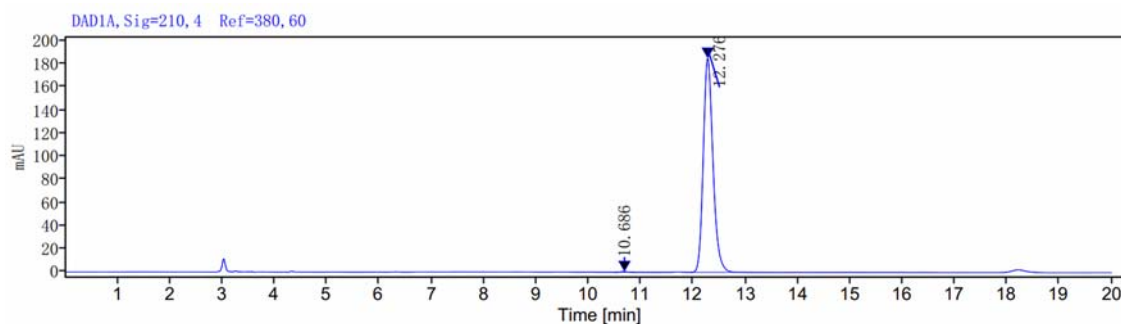

**Signal:** DAD1A, Sig=210, 4 Ref=380, 60

| RetTime [min] | Type | Width [min] | Area [mAU*s] | Height [mAU] | Area %  |
|---------------|------|-------------|--------------|--------------|---------|
| 10.686        | MM m | 0.37885     | 5.38661      | 0.53651      | 0.2251  |
| 12.276        | BV   | 0.84790     | 2387.53486   | 185.25042    | 99.7749 |
| Totals        |      |             | 2392.92147   |              |         |

<Chromatogram>

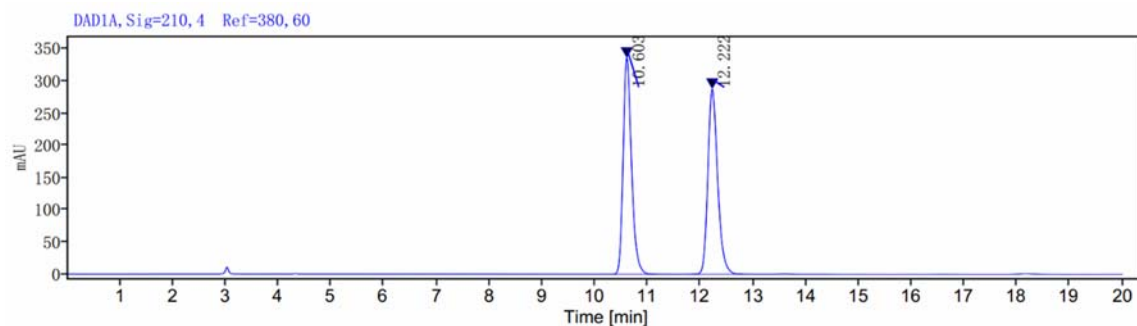

**Signal:** DAD1A, Sig=210, 4 Ref=380, 60

| RetTime [min] | Type | Width [min] | Area [mAU*s] | Height [mAU] | Area %  |
|---------------|------|-------------|--------------|--------------|---------|
| 10.603        | VV   | 0.80967     | 3717.33852   | 336.63845    | 49.9472 |
| 12.222        | VV   | 0.98372     | 3725.19125   | 287.98791    | 50.0528 |
| Totals        |      |             | 7442.52976   |              |         |

**Figure S-54.** HPLC Data of (S)-3d (from 2a) and racemic 3d

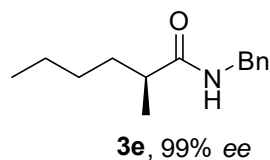

<Chromatogram>

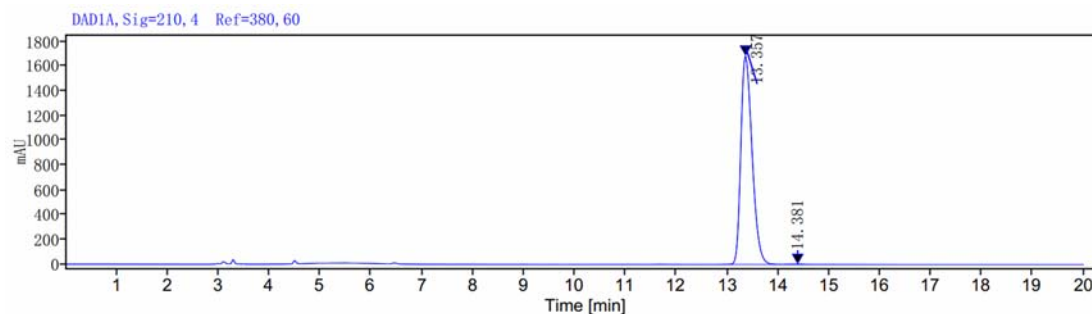

**Signal:** DAD1A, Sig=210, 4 Ref=380, 60

| RetTime [min] | Type | Width [min] | Area [mAU*s] | Height [mAU] | Area %  |
|---------------|------|-------------|--------------|--------------|---------|
| 13.357        | VV   | 0.90026     | 25845.36840  | 1687.31356   | 99.9785 |
| 14.381        | MM m | 0.36955     | 5.55029      | 0.67512      | 0.0215  |
| Totals        |      |             | 25850.91868  |              |         |

<Chromatogram>

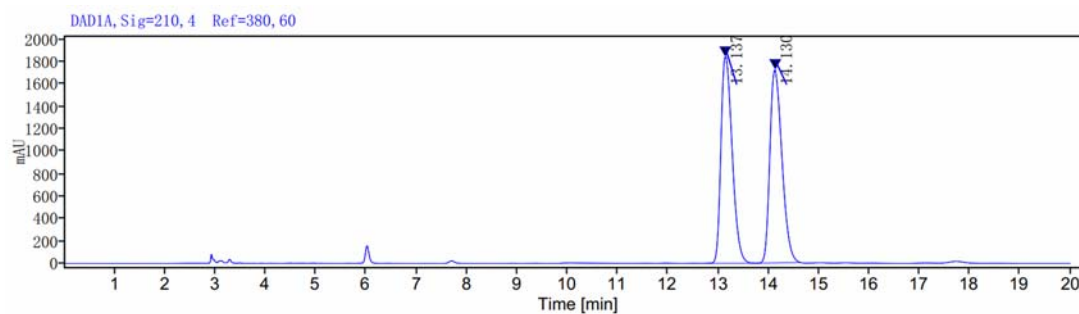

**Signal:** DAD1A, Sig=210, 4 Ref=380, 60

| RetTime [min] | Type | Width [min] | Area [mAU*s] | Height [mAU] | Area %  |
|---------------|------|-------------|--------------|--------------|---------|
| 13.137        | MM m | 0.98376     | 28688.95822  | 1845.78374   | 49.8798 |
| 14.130        | MM m | 0.86958     | 28827.20550  | 1728.17045   | 50.1202 |
| Totals        |      |             | 57516.16372  |              |         |

**Figure S-55.** HPLC Data of (*S*)-**3e** (from **2b**) and racemic **3e**

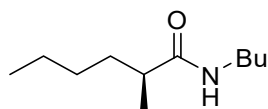

**3f**, 99% ee

<Chromatogram>

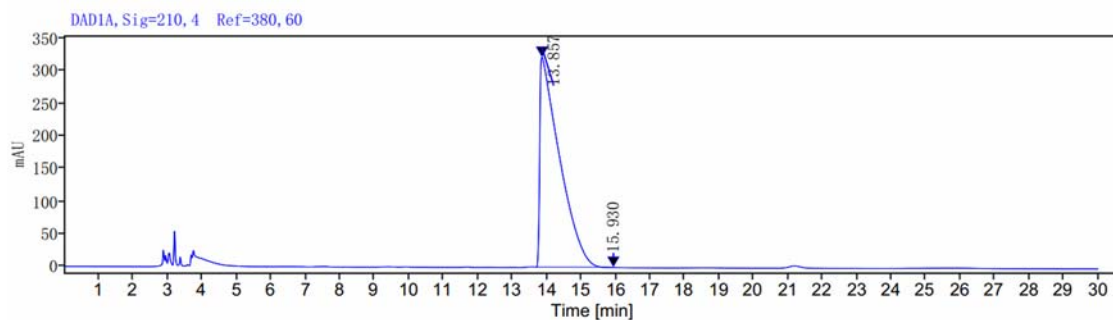

**Signal:** DAD1A, Sig=210, 4 Ref=380, 60

| RetTime [min] | Type | Width [min] | Area [mAU*s] | Height [mAU] | Area %  |
|---------------|------|-------------|--------------|--------------|---------|
| 13.857        | BM m | 1.91654     | 12801.52540  | 322.25501    | 99.9407 |
| 15.930        | MM n | 0.78850     | 7.59839      | 0.40060      | 0.0593  |
| Totals        |      |             | 12809.12379  |              |         |

<Chromatogram>

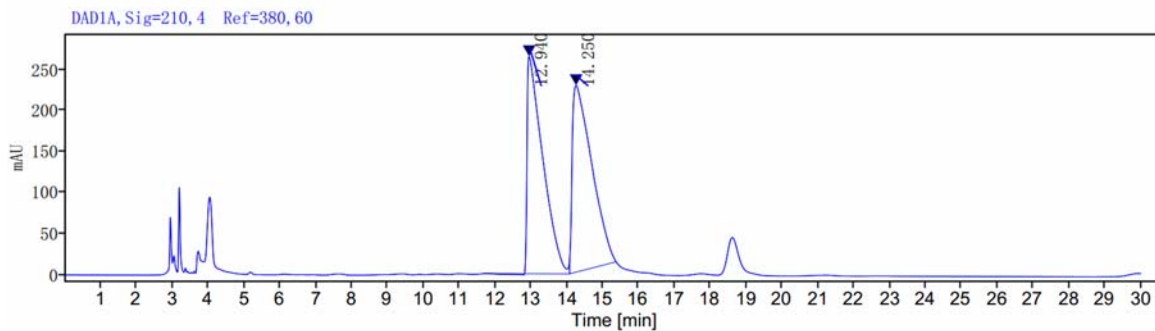

**Signal:** DAD1A, Sig=210, 4 Ref=380, 60

| RetTime [min] | Type | Width [min] | Area [mAU*s] | Height [mAU] | Area %  |
|---------------|------|-------------|--------------|--------------|---------|
| 12.940        | MM m | 2.38103     | 7969.90326   | 264.35727    | 48.1868 |
| 14.250        | MM m | 1.30084     | 8569.71227   | 227.15375    | 51.8132 |
| Totals        |      |             | 16539.61553  |              |         |

**Figure S-56.** HPLC Data of (S)-**3f** (from **2b**) and racemic **3f**

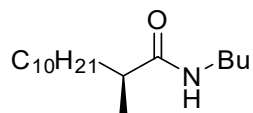

**3g**, 99% ee

<Chromatogram>

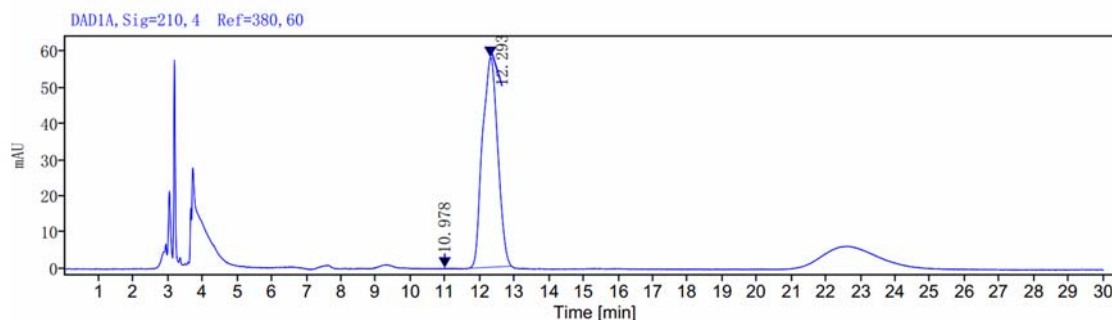

**Signal:** DAD1A, Sig=210, 4 Ref=380, 60

| RetTime [min] | Type | Width [min] | Area [mAU*s] | Height [mAU] | Area %  |
|---------------|------|-------------|--------------|--------------|---------|
| 10.978        | MM m | 0.83576     | 2.21971      | 0.23422      | 0.1244  |
| 12.293        | VM m | 1.17024     | 1781.80580   | 58.06325     | 99.8756 |
| Totals        |      |             | 1784.02551   |              |         |

<Chromatogram>

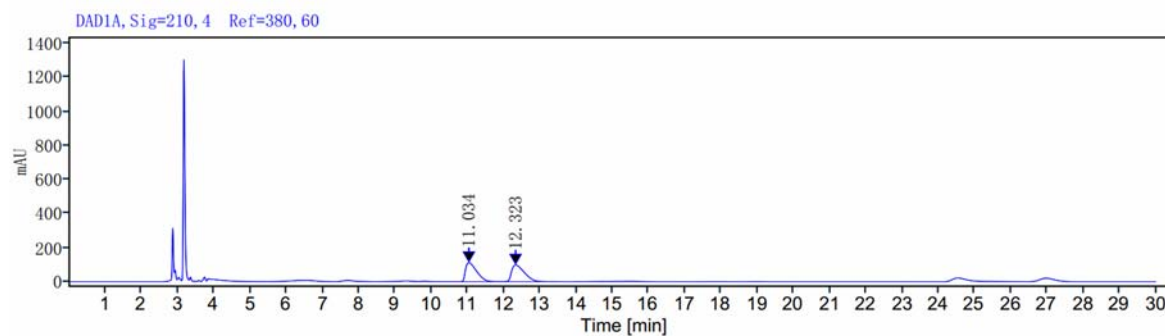

**Signal:** DAD1A, Sig=210, 4 Ref=380, 60

| RetTime [min] | Type | Width [min] | Area [mAU*s] | Height [mAU] | Area %  |
|---------------|------|-------------|--------------|--------------|---------|
| 11.034        | BV   | 0.92804     | 2357.26133   | 111.61976    | 49.9018 |
| 12.323        | VV   | 1.10855     | 2366.53768   | 97.41087     | 50.0982 |
| Totals        |      |             | 4723.79901   |              |         |

**Figure S-57.** HPLC Data of (S)-**3g** (from **2c**) and racemic **3g**

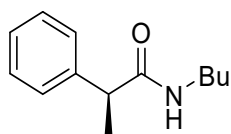

**3h**, 98% ee

<Chromatogram>

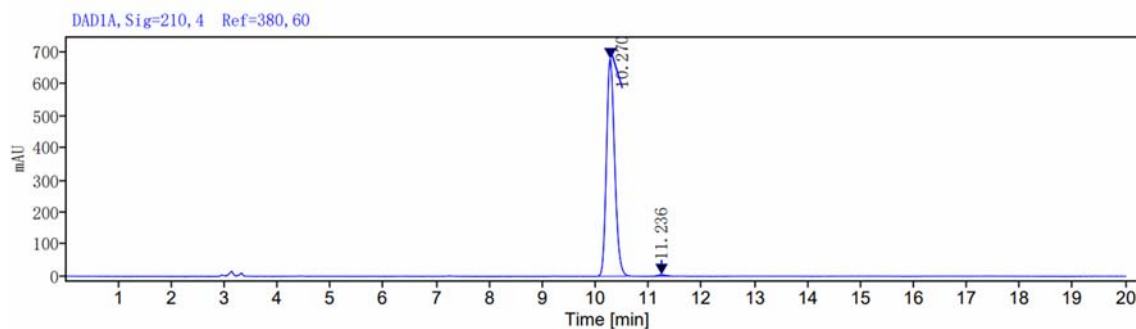

**Signal:** DAD1A, Sig=210, 4 Ref=380, 60

| RetTime [min] | Type | Width [min] | Area [mAU*s] | Height [mAU] | Area %  |
|---------------|------|-------------|--------------|--------------|---------|
| 10.270        | VV   | 0.54225     | 7312.73319   | 680.20639    | 99.1837 |
| 11.236        | MM m | 0.44344     | 60.18257     | 5.32873      | 0.8163  |
| Totals        |      |             | 7372.91575   |              |         |

<Chromatogram>

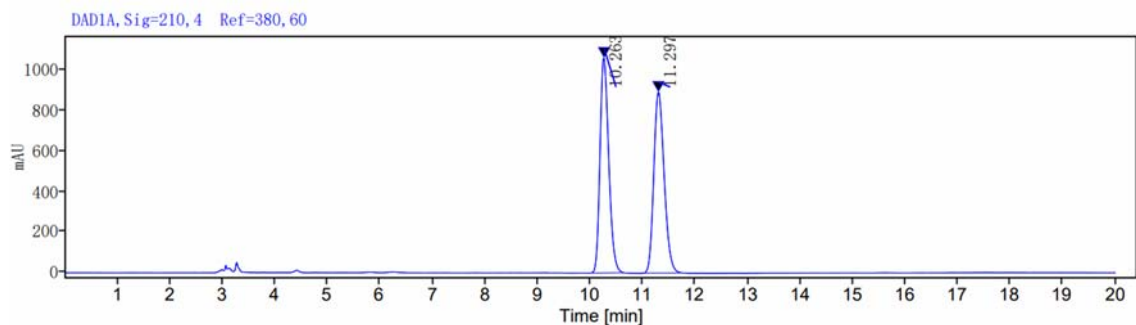

**Signal:** DAD1A, Sig=210, 4 Ref=380, 60

| RetTime [min] | Type | Width [min] | Area [mAU*s] | Height [mAU] | Area %  |
|---------------|------|-------------|--------------|--------------|---------|
| 10.263        | BV m | 0.62168     | 12168.43032  | 1056.30095   | 49.9347 |
| 11.297        | BV m | 0.70275     | 12200.26900  | 889.65273    | 50.0653 |
| Totals        |      |             | 24368.69932  |              |         |

**Figure S-58.** HPLC Data of (*S*)-**3h** (from **2d**) and racemic **3h**

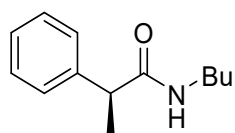

**3h**, 95% ee

<Chromatogram>

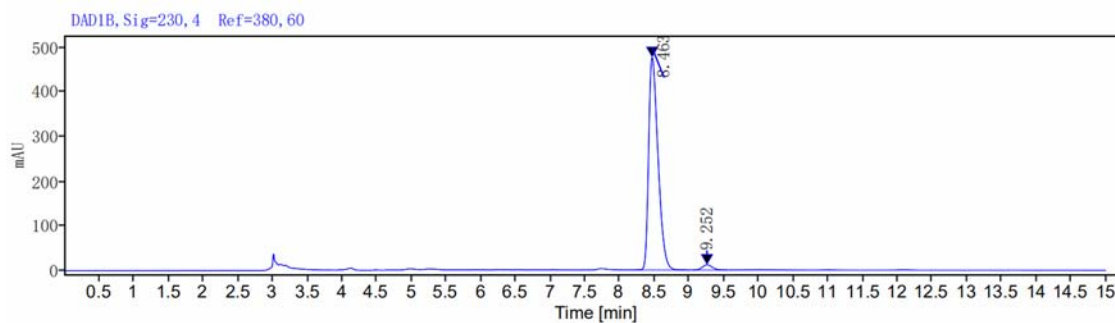

**Signal:** DAD1B, Sig=230, 4 Ref=380, 60

| RetTime [min] | Type | Width [min] | Area [mAU*s] | Height [mAU] | Area %  |
|---------------|------|-------------|--------------|--------------|---------|
| 8.463         | VV   | 0.76115     | 4463.48544   | 476.34449    | 97.4538 |
| 9.252         | VV   | 0.48983     | 116.61908    | 11.60847     | 2.5462  |
| Totals        |      |             | 4580.10451   |              |         |

<Chromatogram>

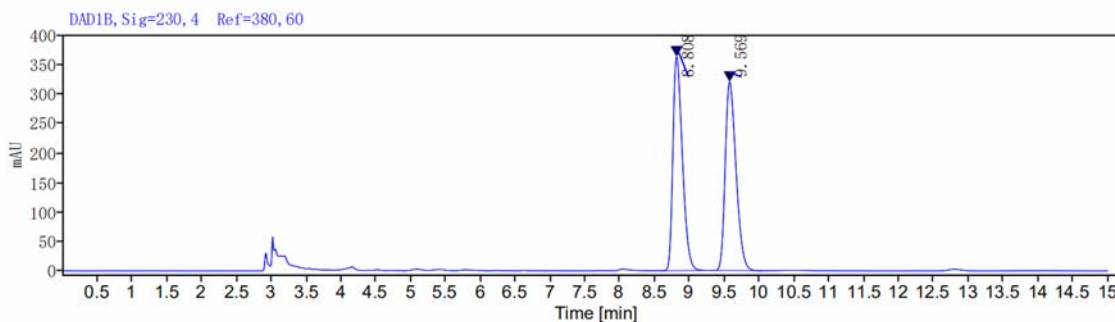

**Signal:** DAD1B, Sig=230, 4 Ref=380, 60

| RetTime [min] | Type | Width [min] | Area [mAU*s] | Height [mAU] | Area %  |
|---------------|------|-------------|--------------|--------------|---------|
| 8.808         | BB   | 0.73000     | 3463.42117   | 365.52884    | 49.9960 |
| 9.569         | BB   | 0.70487     | 3463.96981   | 321.97130    | 50.0040 |
| Totals        |      |             | 6927.39098   |              |         |

**Figure S-59.** HPLC Data of (*S*)-**3h** (from **2g**) and racemic **3h**

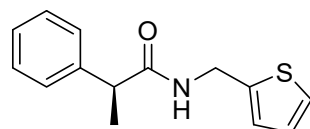

**3i**, 99% ee

<Chromatogram>

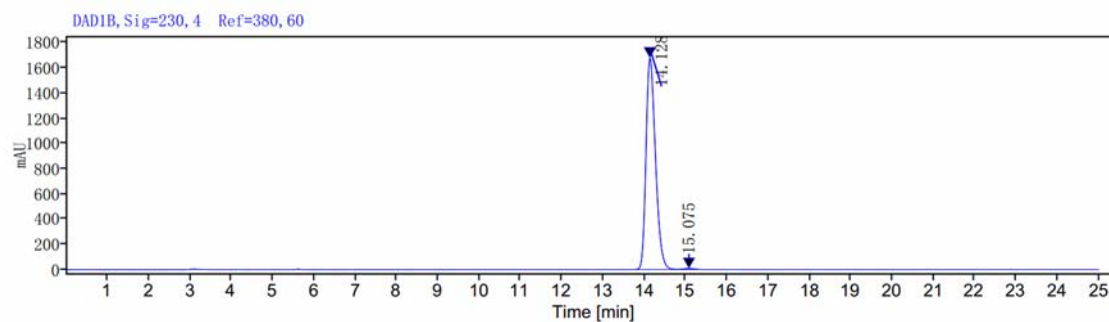

**Signal:** DAD1B, Sig=230, 4 Ref=380, 60

| RetTime [min] | Type | Width [min] | Area [mAU*s] | Height [mAU] | Area %  |
|---------------|------|-------------|--------------|--------------|---------|
| 14.128        | VM m | 0.95945     | 26696.85491  | 1680.44643   | 99.5228 |
| 15.075        | MM m | 0.73907     | 128.01348    | 8.54419      | 0.4772  |
| Totals        |      |             | 26824.86839  |              |         |

<Chromatogram>

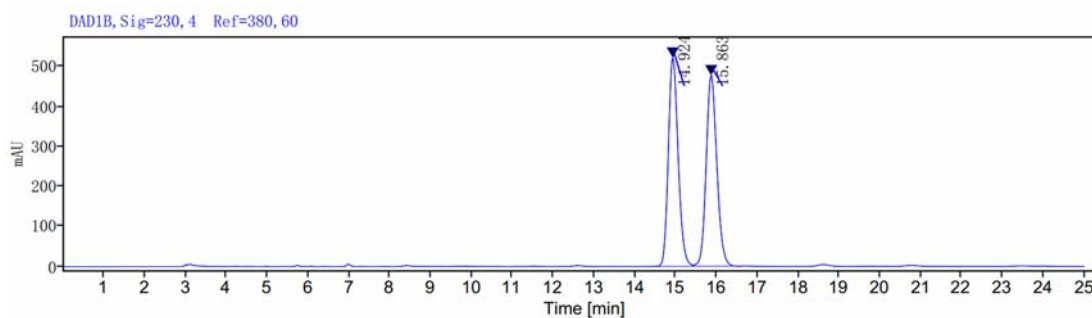

**Signal:** DAD1B, Sig=230, 4 Ref=380, 60

| RetTime [min] | Type | Width [min] | Area [mAU*s] | Height [mAU] | Area %  |
|---------------|------|-------------|--------------|--------------|---------|
| 14.924        | VV   | 0.85821     | 8680.61103   | 521.15970    | 50.1360 |
| 15.863        | VV   | 0.96463     | 8633.50568   | 476.90723    | 49.8640 |
| Totals        |      |             | 17314.11671  |              |         |

**Figure S-60.** HPLC Data of (S)-**3i** (from **2d**) and racemic **3i**



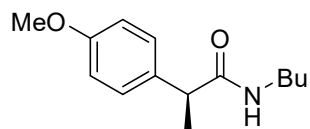

**3j**, 97% ee

<Chromatogram>

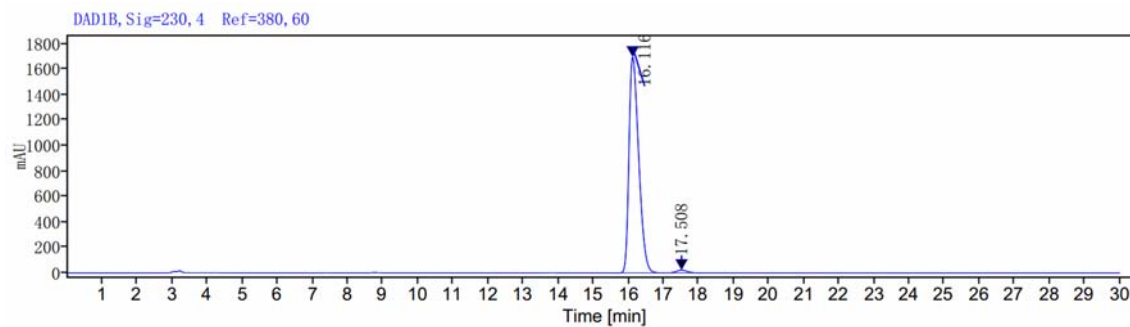

**Signal:** DAD1B, Sig=230, 4 Ref=380, 60

| RetTime [min] | Type | Width [min] | Area [mAU*s] | Height [mAU] | Area %  |
|---------------|------|-------------|--------------|--------------|---------|
| 16.116        | VV   | 1.40667     | 32531.38208  | 1695.76849   | 98.5642 |
| 17.508        | VV   | 0.98995     | 473.88330    | 22.07644     | 1.4358  |
| Totals        |      |             | 33005.26538  |              |         |

<Chromatogram>

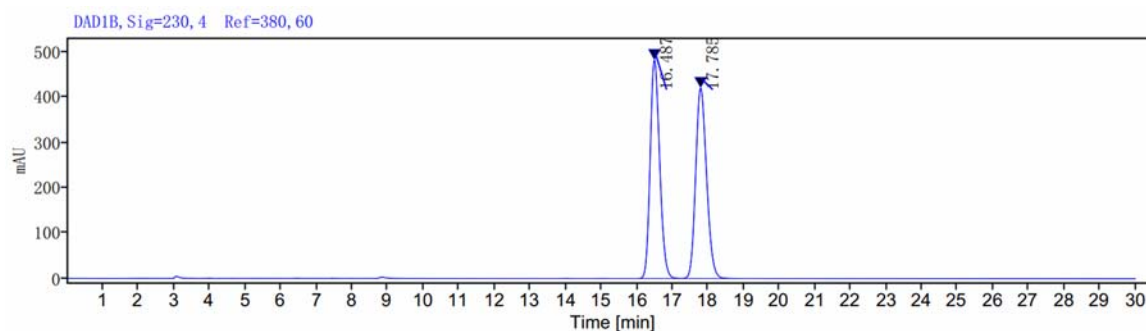

**Signal:** DAD1B, Sig=230, 4 Ref=380, 60

| RetTime [min] | Type | Width [min] | Area [mAU*s] | Height [mAU] | Area %  |
|---------------|------|-------------|--------------|--------------|---------|
| 16.487        | VV   | 1.14224     | 8944.11694   | 482.78844    | 49.9870 |
| 17.785        | BV   | 1.34458     | 8948.75425   | 421.05607    | 50.0130 |
| Totals        |      |             | 17892.87119  |              |         |

**Figure S-61.** HPLC Data of (S)-**3j** (from **2e**) and racemic **3j**

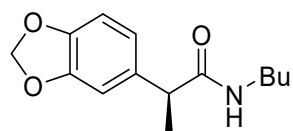

**3k**, 96% ee

<Chromatogram>

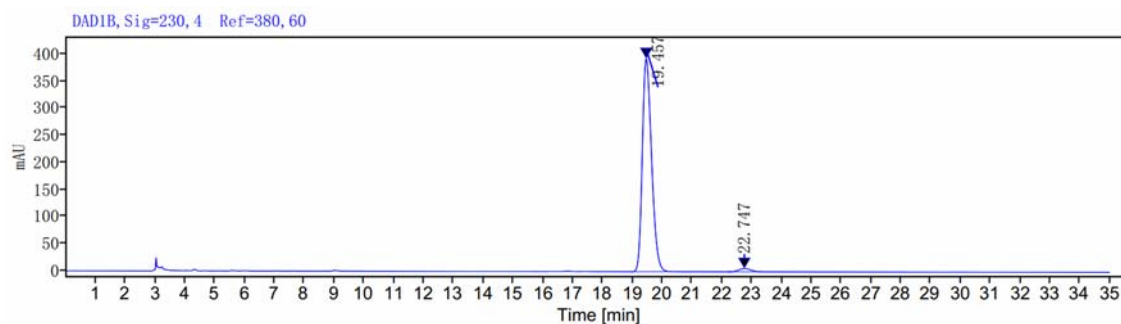

**Signal:** DAD1B, Sig=230, 4 Ref=380, 60

| RetTime [min] | Type | Width [min] | Area [mAU*s] | Height [mAU] | Area %  |
|---------------|------|-------------|--------------|--------------|---------|
| 19.457        | VV   | 1.35307     | 8469.37349   | 393.68731    | 98.0449 |
| 22.747        | VV   | 1.07922     | 168.88511    | 5.96738      | 1.9551  |
| Totals        |      |             | 8638.25860   |              |         |

<Chromatogram>

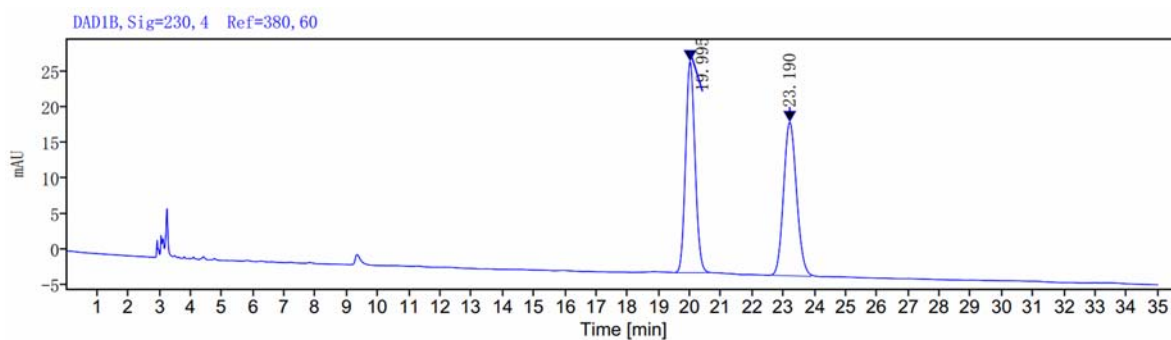

**Signal:** DAD1B, Sig=230, 4 Ref=380, 60

| RetTime [min] | Type | Width [min] | Area [mAU*s] | Height [mAU] | Area %  |
|---------------|------|-------------|--------------|--------------|---------|
| 19.995        | VV   | 1.06206     | 626.10826    | 29.79597     | 50.0015 |
| 23.190        | VV   | 1.23833     | 626.07109    | 21.63212     | 49.9985 |
| Totals        |      |             | 1252.17935   |              |         |

**Figure S-62.** HPLC Data of (S)-**3k** (from **2f**) and racemic **3k**

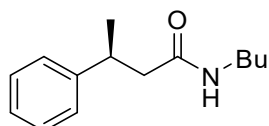

**3s**, 99% ee

<Chromatogram>

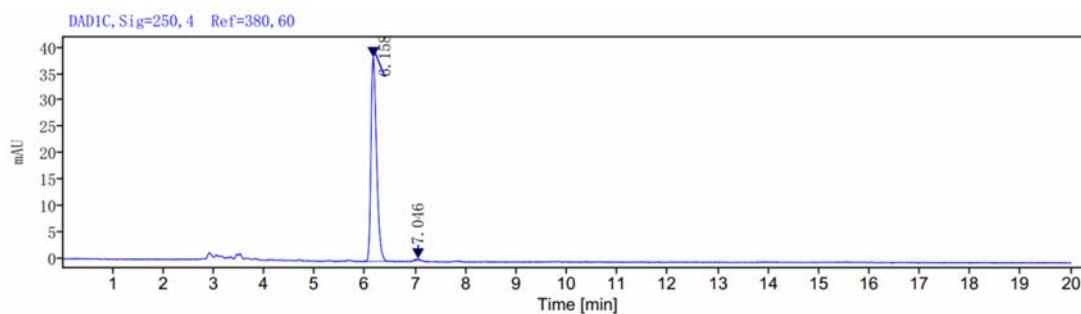

**Signal:** DAD1C, Sig=250, 4 Ref=380, 60

| RetTime [min] | Type | Width [min] | Area [mAU*s] | Height [mAU] | Area %  |
|---------------|------|-------------|--------------|--------------|---------|
| 6.158         | MM m | 0.61000     | 294.93647    | 38.63150     | 99.3963 |
| 7.046         | MM m | 0.18603     | 1.79123      | 0.34547      | 0.6037  |
| Totals        |      |             | 296.72770    |              |         |

<Chromatogram>

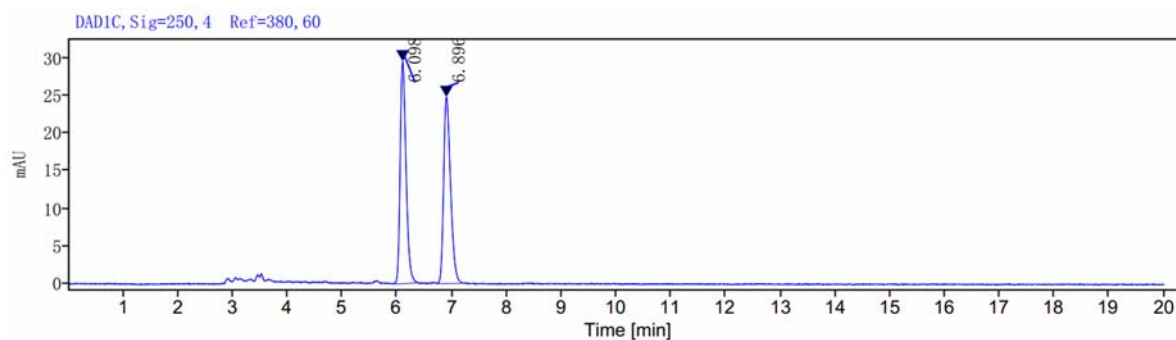

**Signal:** DAD1C, Sig=250, 4 Ref=380, 60

| RetTime [min] | Type | Width [min] | Area [mAU*s] | Height [mAU] | Area %  |
|---------------|------|-------------|--------------|--------------|---------|
| 6.098         | VV   | 0.37655     | 218.53107    | 29.57186     | 50.1174 |
| 6.896         | VV   | 0.43264     | 217.50707    | 24.80577     | 49.8826 |
| Totals        |      |             | 436.03814    |              |         |

**Figure S-63.** HPLC Data of (S)-3s (from 2j) and racemic 3s

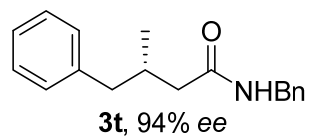

<Chromatogram>

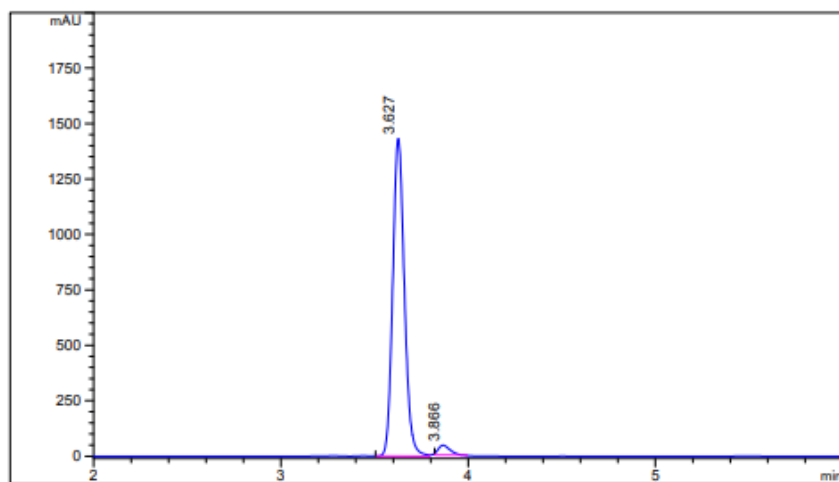

| 编号 | 峰高      | 峰类型 | 峰面积     | 峰面积 %  | 实测保留时间 |
|----|---------|-----|---------|--------|--------|
| 1  | 1.432e3 | VV  | 6.179e3 | 96.920 | 3.627  |
| 2  | 44.827  | MM  | 196.347 | 3.080  | 3.866  |

<Chromatogram>

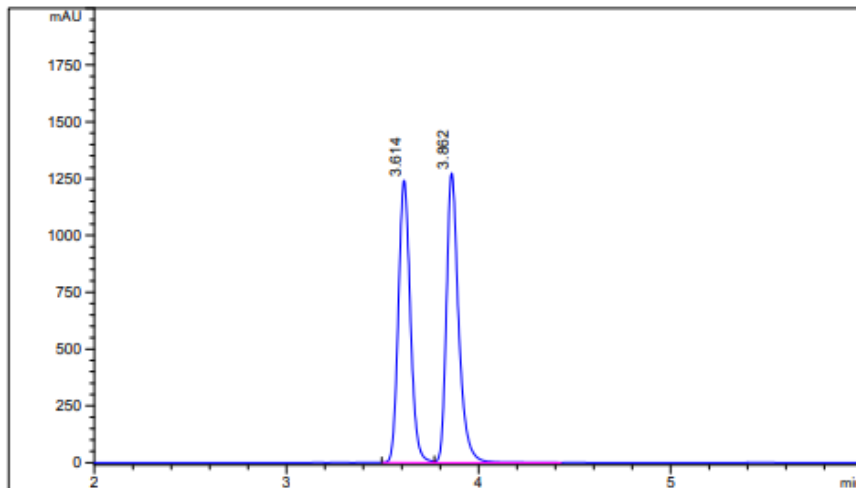

| 编号 | 峰高      | 峰类型 | 峰面积     | 峰面积 %  | 实测保留时间 |
|----|---------|-----|---------|--------|--------|
| 1  | 1.242e3 | VV  | 5.361e3 | 48.839 | 3.614  |
| 2  | 1.275e3 | VV  | 5.615e3 | 51.161 | 3.862  |

**Figure S-64.** HPLC Data of (S)-3t (from 2k) and racemic 3t

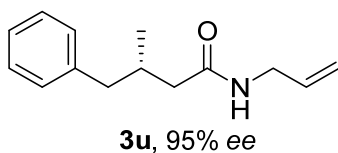

<Chromatogram>

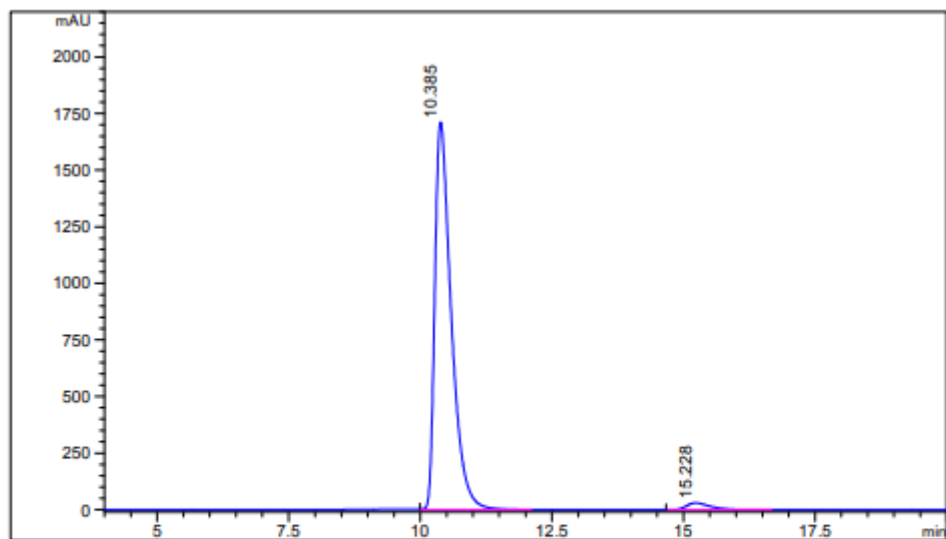

| 编号 | 峰高      | 峰类型 | 峰面积     | 峰面积 %  | 实测保留时间 |
|----|---------|-----|---------|--------|--------|
| 1  | 1.711e3 | VB  | 3.705e4 | 97.560 | 10.385 |
| 2  | 30.026  | BB  | 926.802 | 2.440  | 15.228 |

<Chromatogram>

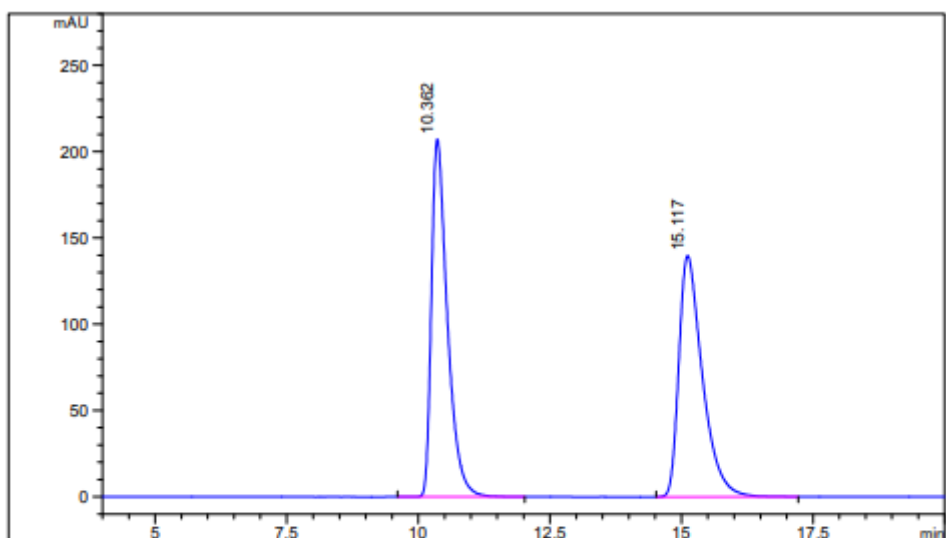

| 编号 | 峰高      | 峰类型 | 峰面积     | 峰面积 %  | 实测保留时间 |
|----|---------|-----|---------|--------|--------|
| 1  | 207.290 | BB  | 4.361e3 | 50.100 | 10.362 |
| 2  | 139.730 | BB  | 4.343e3 | 49.900 | 15.117 |

Figure S-65. HPLC Data of (S)-3u (from 2k) and racemic 3u

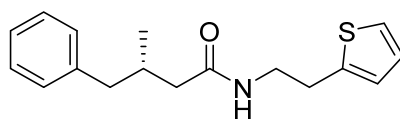

**3v**, 95% ee

<Chromatogram>

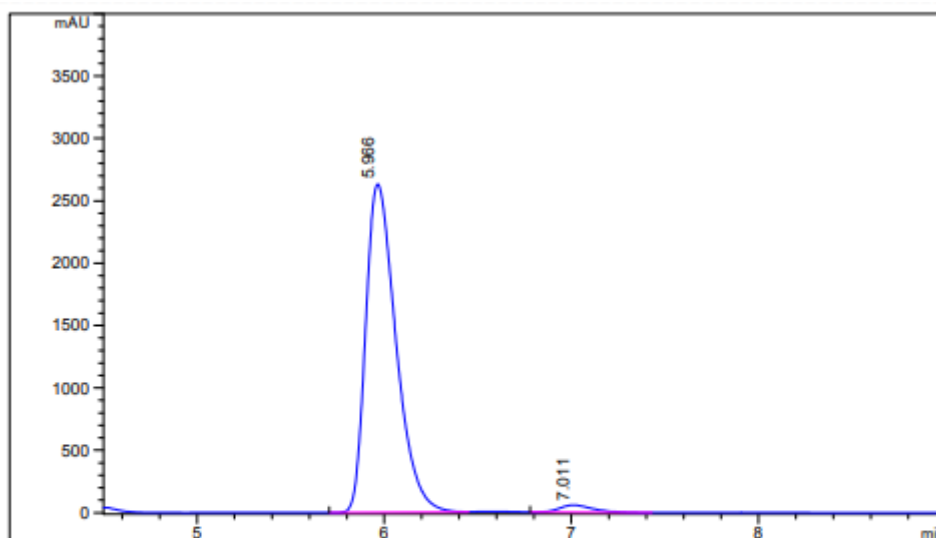

| 编号 | 峰高      | 峰类型 | 峰面积     | 峰面积 %  | 实测保留时间 |
|----|---------|-----|---------|--------|--------|
| 1  | 2.632e3 | BV  | 2.964e4 | 97.734 | 5.966  |
| 2  | 56.684  | BB  | 687.023 | 2.266  | 7.011  |

<Chromatogram>

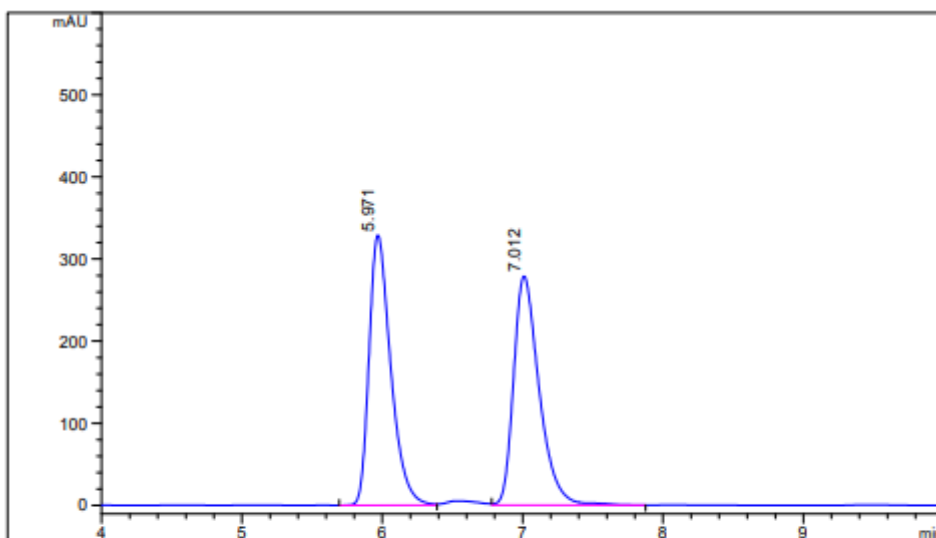

| 编号 | 峰高      | 峰类型 | 峰面积     | 峰面积 %  | 实测保留时间 |
|----|---------|-----|---------|--------|--------|
| 1  | 328.771 | BV  | 3.530e3 | 49.925 | 5.971  |
| 2  | 278.823 | VB  | 3.540e3 | 50.075 | 7.012  |

**Figure S-66.** HPLC Data of (S)-3v (from 2k) and racemic 3v

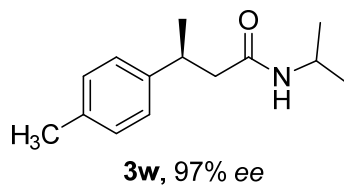

<Chromatogram>

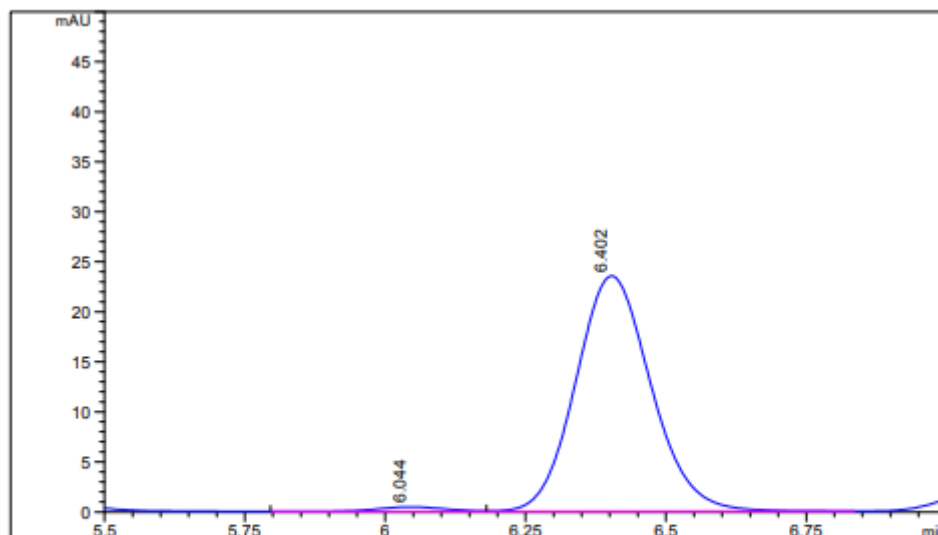

| 编号 | 峰高     | 峰类型 | 峰面积     | 峰面积 %  | 实测保留时间 |
|----|--------|-----|---------|--------|--------|
| 1  | 0.443  | BV  | 3.669   | 1.645  | 6.044  |
| 2  | 23.467 | VB  | 219.316 | 98.355 | 6.402  |

<Chromatogram>

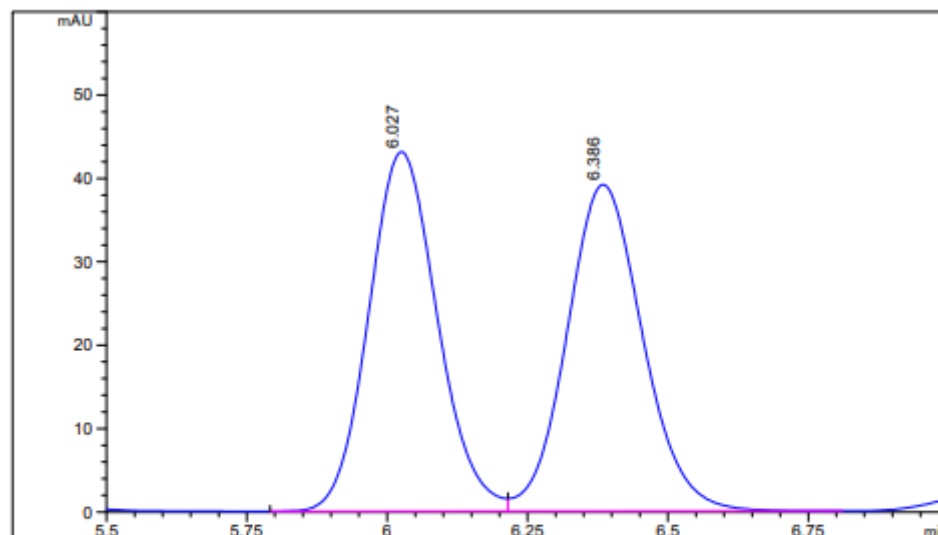

| 编号 | 峰高     | 峰类型 | 峰面积     | 峰面积 %  | 实测保留时间 |
|----|--------|-----|---------|--------|--------|
| 1  | 43.081 | BV  | 366.762 | 49.948 | 6.027  |
| 2  | 39.161 | VB  | 367.524 | 50.052 | 6.386  |

**Figure S-67.** HPLC Data of (*S*)-**3w** (from **2I**) and racemic **3w**

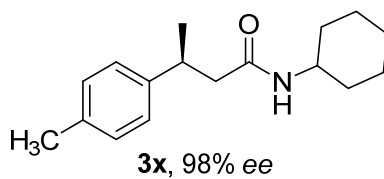

<Chromatogram>

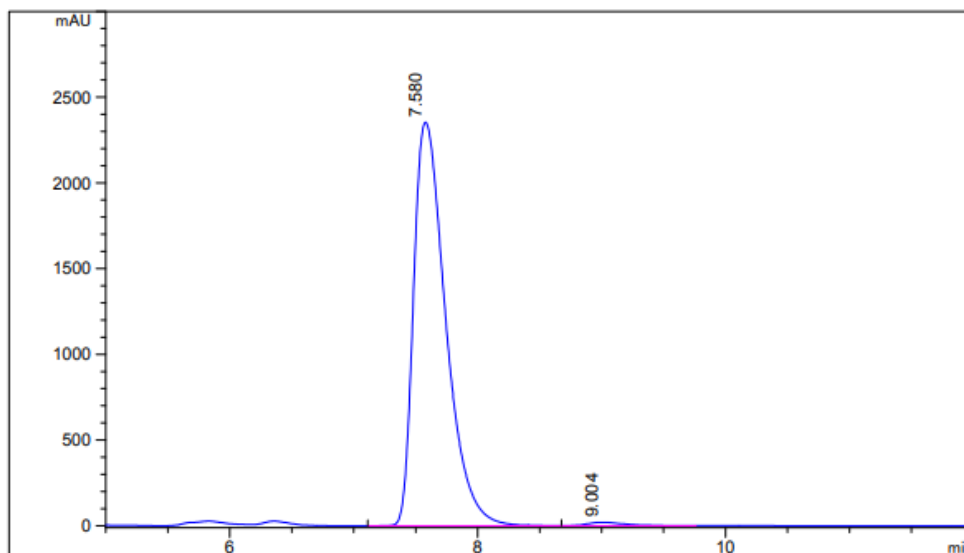

| 编号 | 峰高      | 峰类型 | 峰面积     | 峰面积 %  | 实测保留时间 |
|----|---------|-----|---------|--------|--------|
| 1  | 2.352e3 | BV  | 4.232e4 | 98.953 | 7.580  |
| 2  | 19.863  | VV  | 447.829 | 1.047  | 9.004  |

<Chromatogram>

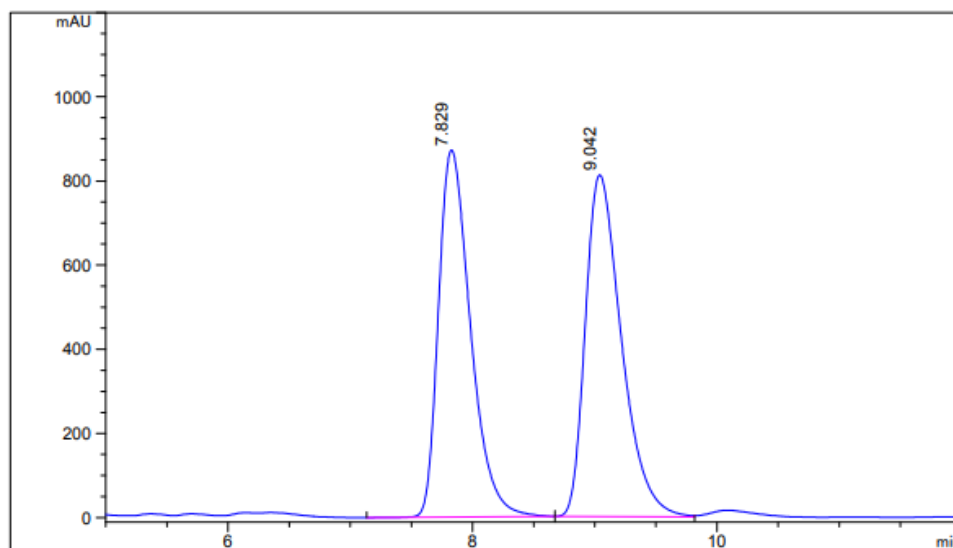

| 编号 | 峰高      | 峰类型 | 峰面积     | 峰面积 %  | 实测保留时间 |
|----|---------|-----|---------|--------|--------|
| 1  | 871.621 | BB  | 1.585e4 | 48.772 | 7.829  |
| 2  | 811.411 | BV  | 1.665e4 | 51.228 | 9.042  |

**Figure S-68.** HPLC Data of (*S*)-**3x** (from **2l**) and racemic **3x**



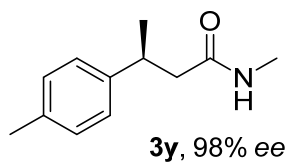

<Chromatogram>

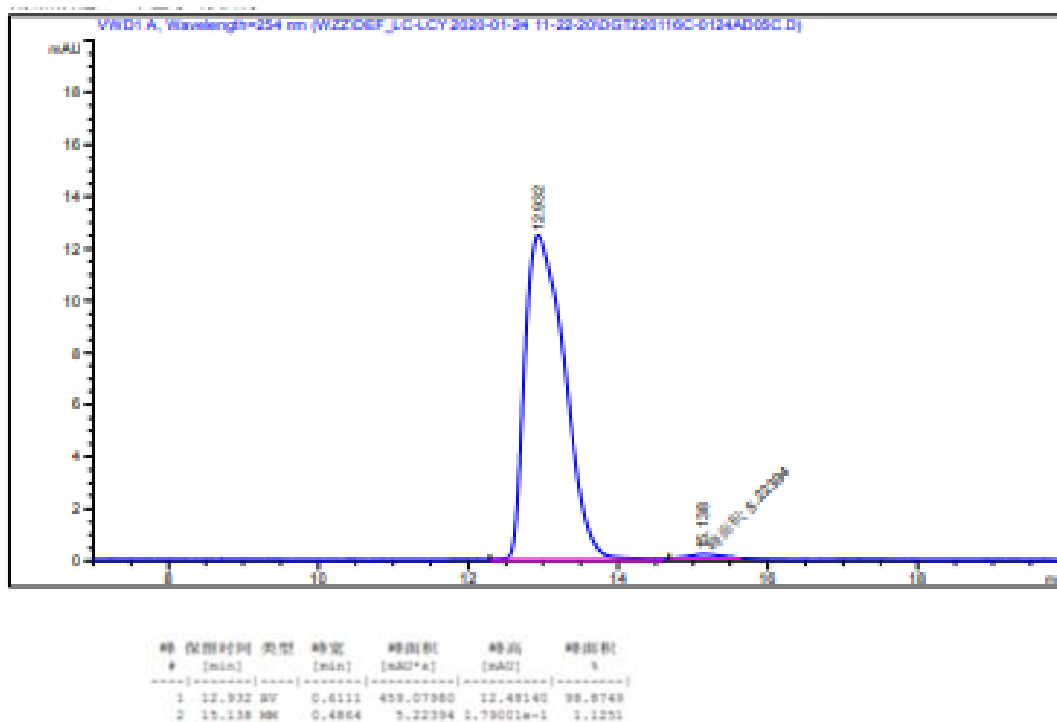

<Chromatogram>

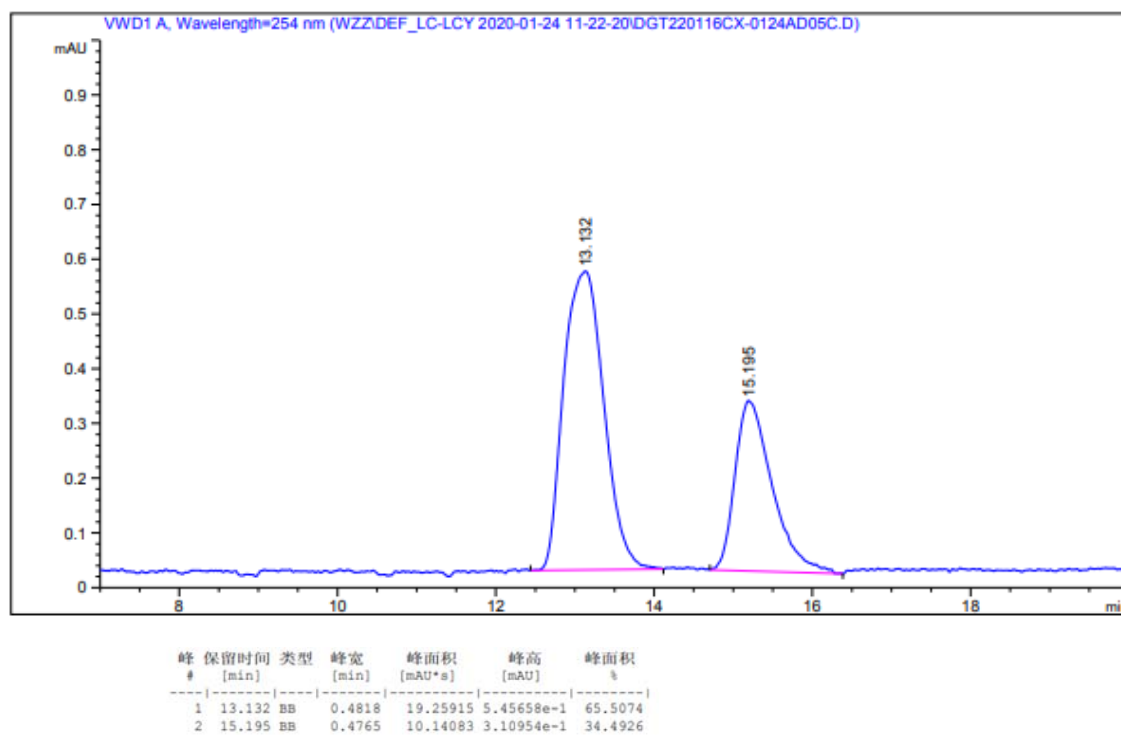

Figure S-69. HPLC Data of (S)-3y (from 2m) and racemic 3y

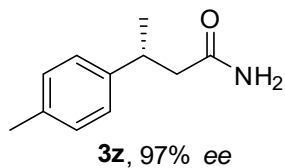

<Chromatogram>

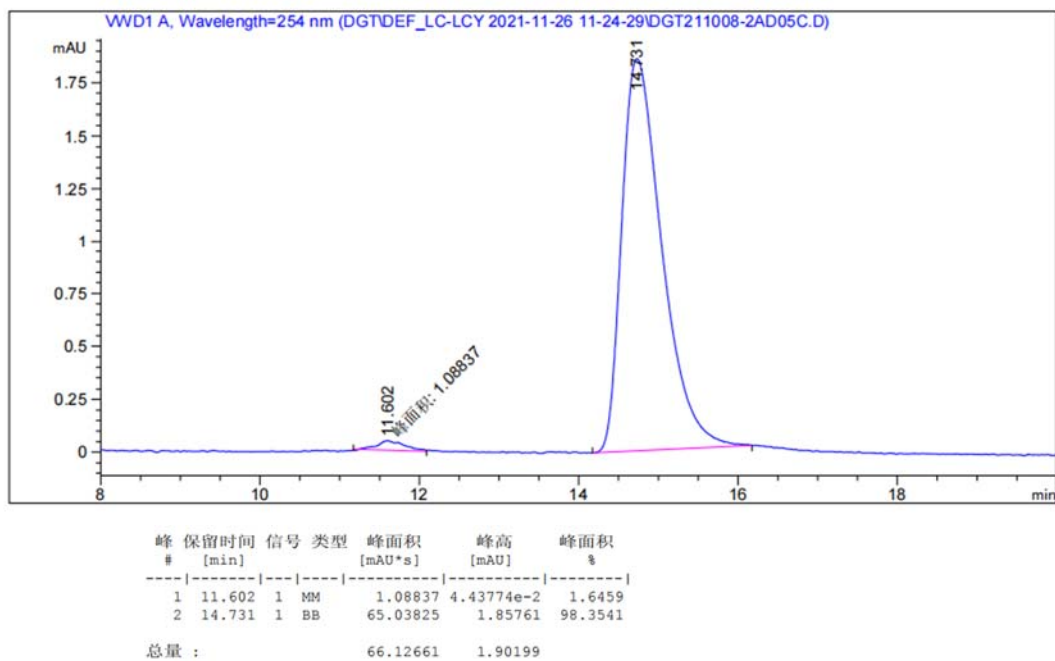

<Chromatogram>

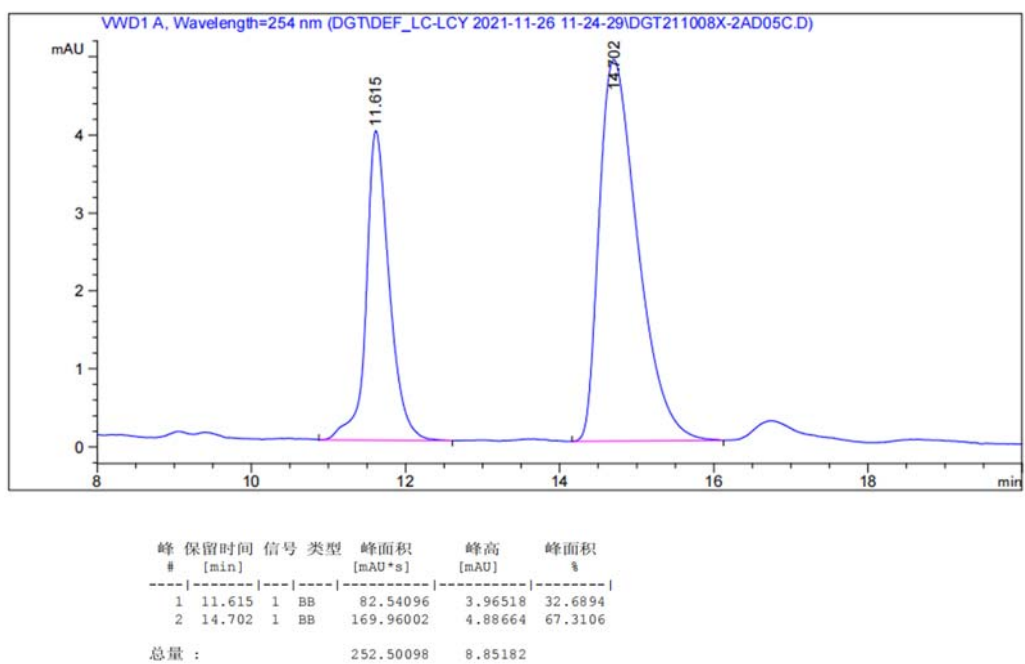

Figure S-70. HPLC Data of (*R*)-3z (from 2n) and racemic 3z

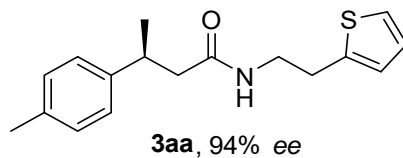

<Chromatogram>

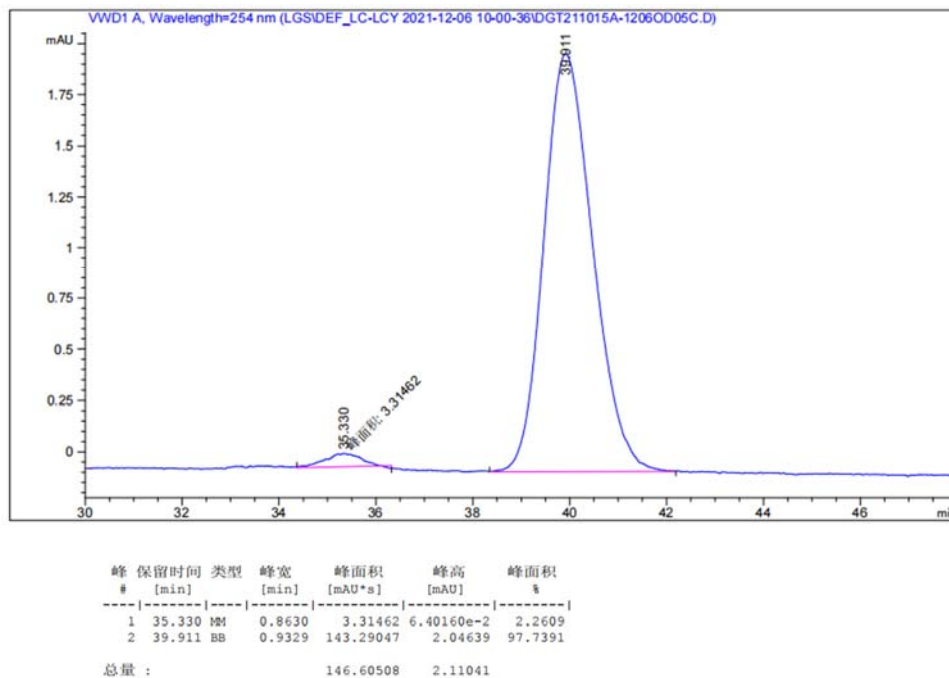

<Chromatogram>

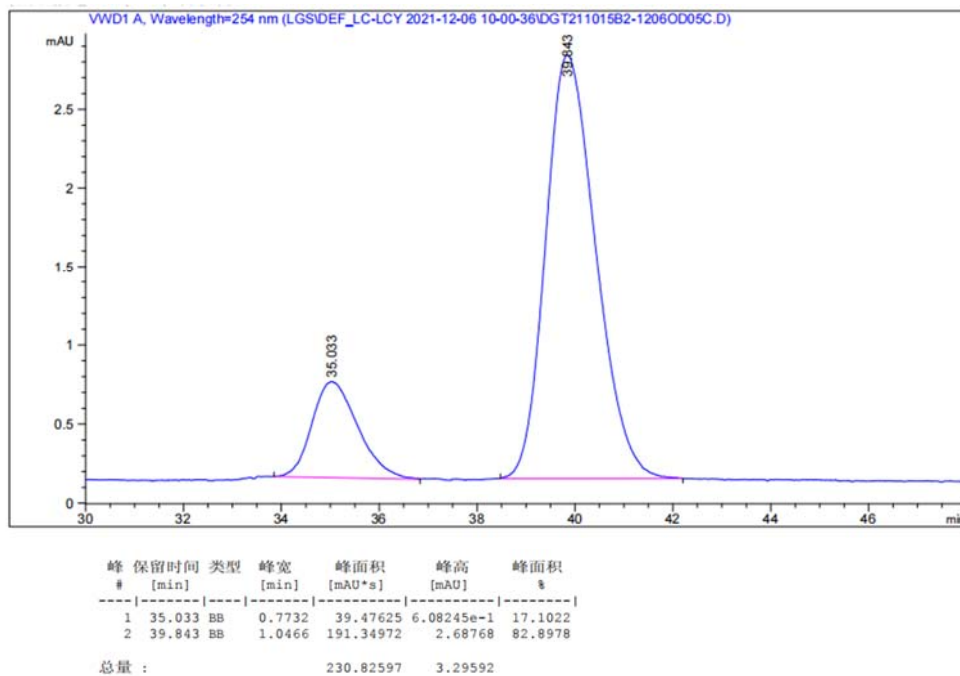

**Figure S-71.** HPLC Data of (S)-**3aa** (from **2I**) and racemic **3aa**

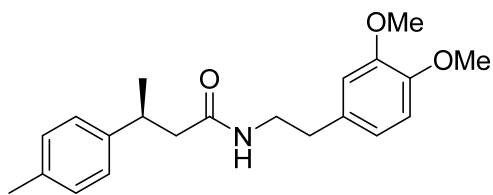

**3ab, 99% ee**

<Chromatogram>

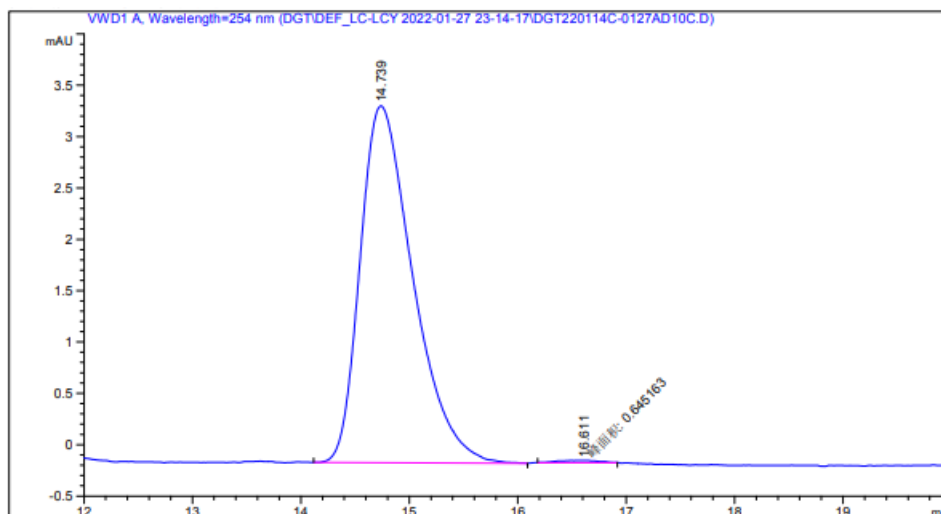

| 峰 # | 保留时间 [min] | 类型 | 峰宽 [min] | 峰面积 [mAU*s] | 峰高 [mAU]   | 峰面积 %   |
|-----|------------|----|----------|-------------|------------|---------|
| 1   | 14.739     | BB | 0.5151   | 117.65303   | 3.47426    | 99.4546 |
| 2   | 16.611     | MM | 0.4470   | 6.45163e-1  | 2.40545e-2 | 0.5454  |

<Chromatogram>

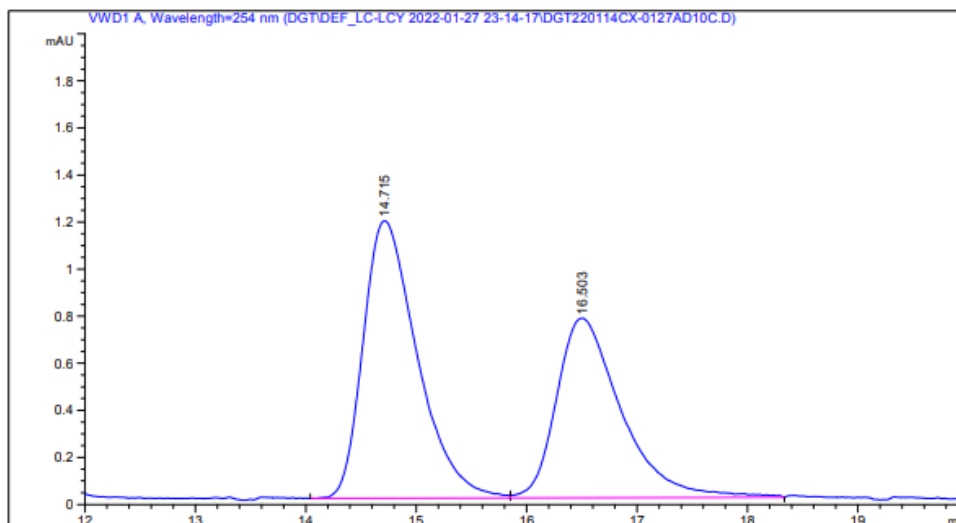

| 峰 # | 保留时间 [min] | 类型 | 峰宽 [min] | 峰面积 [mAU*s] | 峰高 [mAU]   | 峰面积 %   |
|-----|------------|----|----------|-------------|------------|---------|
| 1   | 14.715     | BV | 0.5128   | 40.08183    | 1.17855    | 56.4087 |
| 2   | 16.503     | VB | 0.5898   | 30.97428    | 7.62768e-1 | 43.5913 |

**Figure S-72. HPLC Data of (S)-3ab (from 2m) and racemic 3ab**

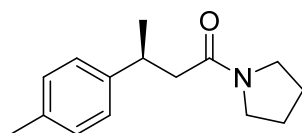

**3ad**, 98% ee

<Chromatogram>

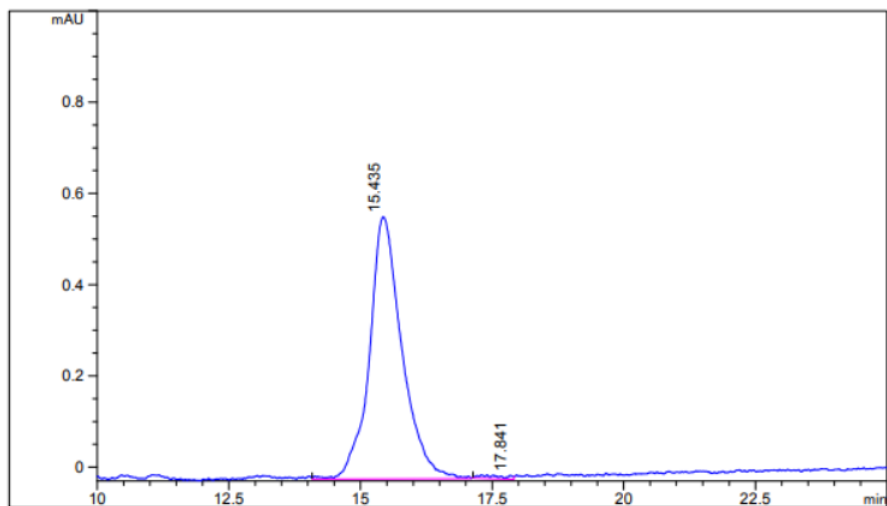

| 编号 | 峰高    | 峰类型 | 峰面积    | 峰面积 %  | 实测保留时间 |
|----|-------|-----|--------|--------|--------|
| 1  | 0.574 | VV  | 24.682 | 98.997 | 15.435 |
| 2  | 0.008 | MM  | 0.250  | 1.003  | 17.841 |

<Chromatogram>

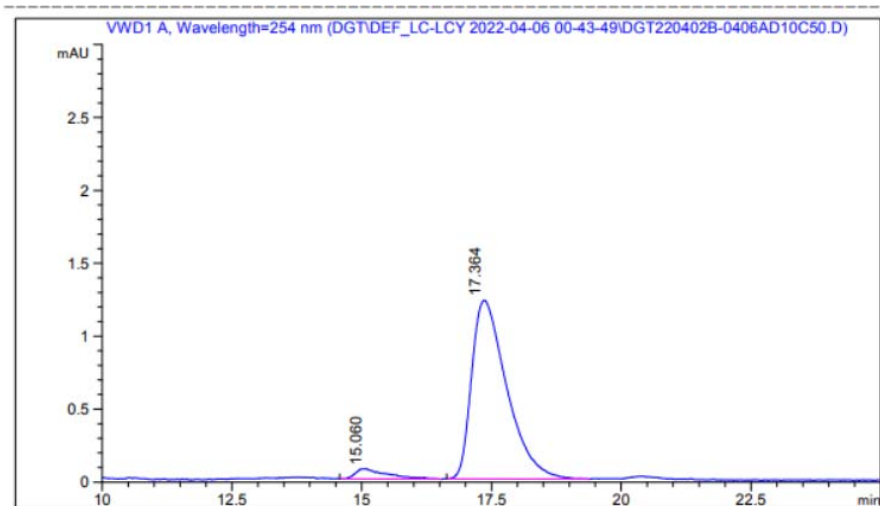

| 编号 | 峰高    | 峰类型 | 峰面积    | 峰面积 %  | 实测保留时间 |
|----|-------|-----|--------|--------|--------|
| 1  | 0.071 | BB  | 3.058  | 5.027  | 15.060 |
| 2  | 1.225 | BB  | 57.780 | 94.973 | 17.364 |

**Figure S-73.** HPLC Data of (*S*)-**3ad** (from **2m**) and (*R*)-**3ad** (from **2n**)

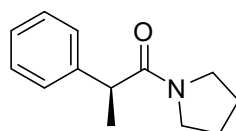

**3ae**, 87% ee

<Chromatogram>

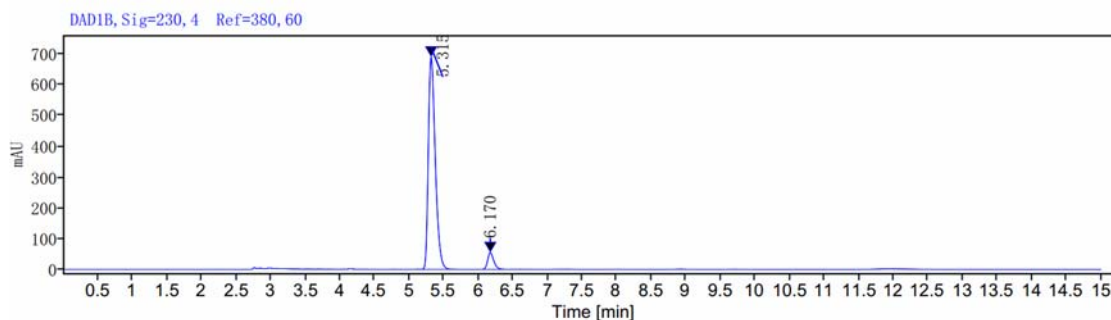

**Signal:** DAD1B, Sig=230, 4 Ref=380, 60

| RetTime [min] | Type | Width [min] | Area [mAU*s] | Height [mAU] | Area %  |
|---------------|------|-------------|--------------|--------------|---------|
| 5.315         | BV   | 0.41023     | 4813.74732   | 692.36288    | 93.4637 |
| 6.170         | BV   | 0.31603     | 336.64425    | 55.12180     | 6.5363  |
| Totals        |      |             | 5150.39157   |              |         |

<Chromatogram>

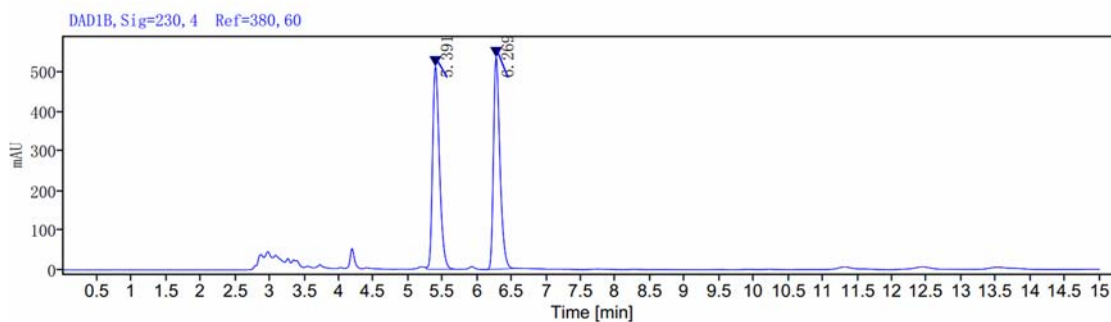

**Signal:** DAD1B, Sig=230, 4 Ref=380, 60

| RetTime [min] | Type | Width [min] | Area [mAU*s] | Height [mAU] | Area %  |
|---------------|------|-------------|--------------|--------------|---------|
| 5.391         | VB   | 0.42499     | 3562.48280   | 514.27071    | 50.4734 |
| 6.269         | BV   | 0.37753     | 3495.65376   | 537.43112    | 49.5266 |
| Totals        |      |             | 7058.13657   |              |         |

**Figure S-74.** HPLC Data of (S)-**3ae** (from **2d**) and racemic **3ae**

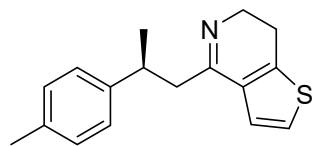

**4b**, 90% ee

<Chromatogram>

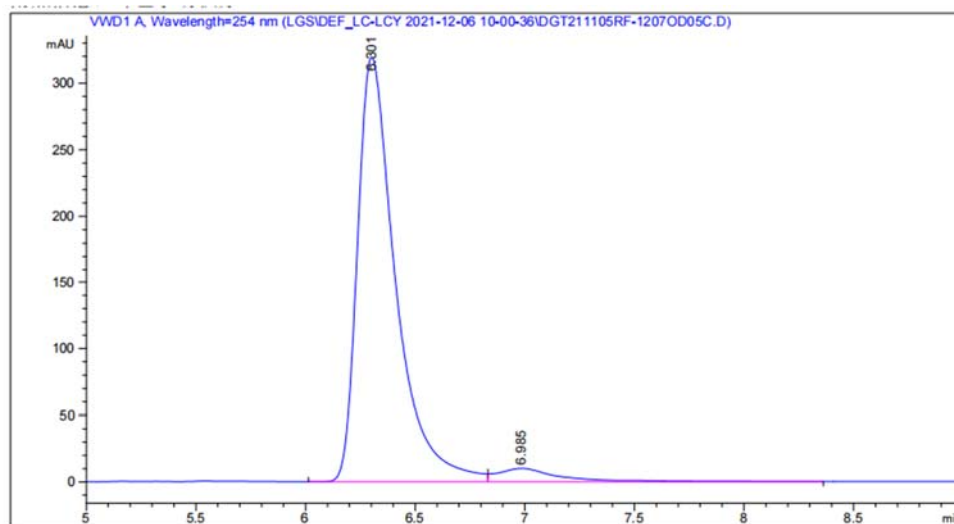

| 峰 #  | 保留时间 [min] | 类型 | 峰宽 [min] | 峰面积 [mAU*s] | 峰高 [mAU]  | 峰面积 %   |
|------|------------|----|----------|-------------|-----------|---------|
| 1    | 6.301      | BV | 0.1810   | 3858.81519  | 319.20117 | 94.9661 |
| 2    | 6.985      | VV | 0.2834   | 204.54344   | 10.05312  | 5.0339  |
| 总量 : |            |    |          | 4063.35863  | 329.25430 |         |

<Chromatogram>

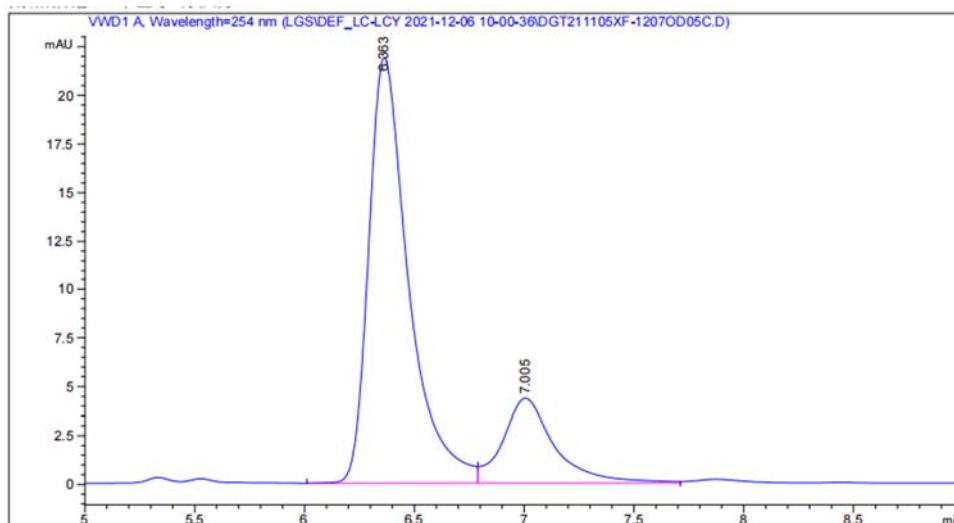

| 峰 #  | 保留时间 [min] | 类型 | 峰宽 [min] | 峰面积 [mAU*s] | 峰高 [mAU] | 峰面积 %   |
|------|------------|----|----------|-------------|----------|---------|
| 1    | 6.363      | BV | 0.1873   | 276.10880   | 21.86767 | 79.5963 |
| 2    | 7.005      | VV | 0.2368   | 70.77776    | 4.32677  | 20.4037 |
| 总量 : |            |    |          | 346.88656   | 26.19444 |         |

**Figure S-75.** HPLC Data of (*S*)-**4b** (from **3aa**) and racemic **4b**

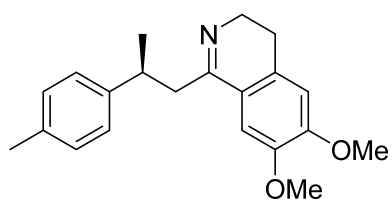

**4c**, 98% ee

<Chromatogram>

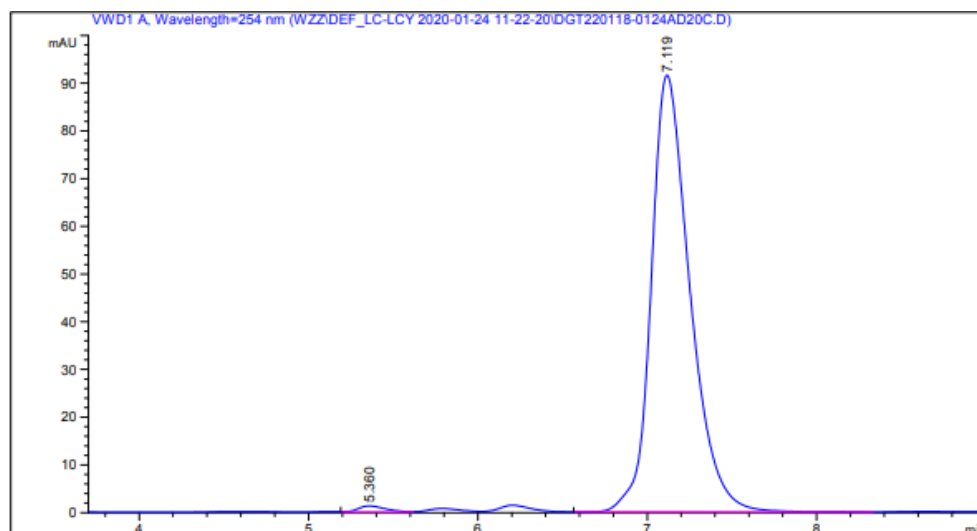

| 峰 # | 保留时间 [min] | 类型 | 峰宽 [min] | 峰面积 [mAU*s] | 峰高 [mAU] | 峰面积 %   |
|-----|------------|----|----------|-------------|----------|---------|
| 1   | 5.360      | VV | 0.1733   | 14.61541    | 1.29913  | 0.9935  |
| 2   | 7.119      | BV | 0.2396   | 1456.49365  | 91.55421 | 99.0065 |

<Chromatogram>

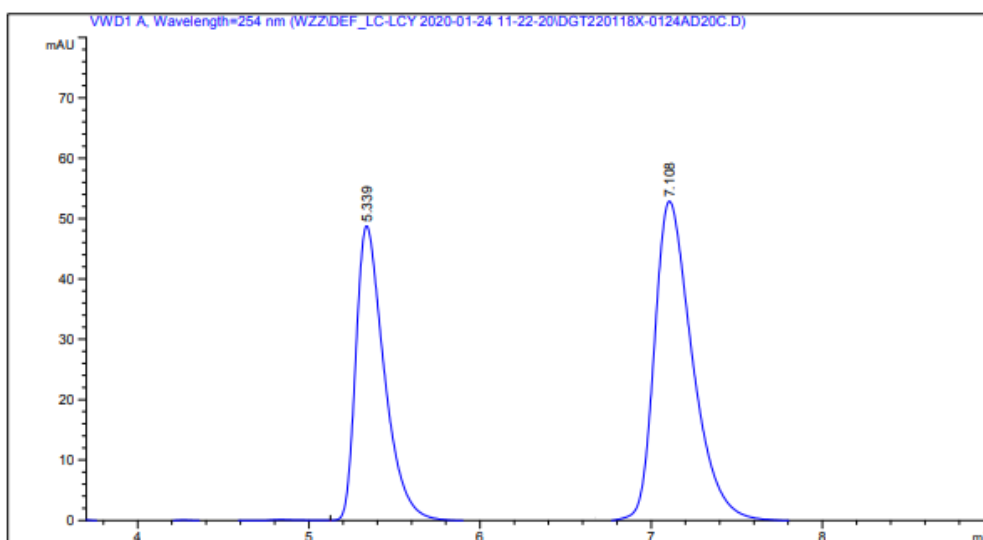

| 峰 # | 保留时间 [min] | 类型 | 峰宽 [min] | 峰面积 [mAU*s] | 峰高 [mAU] | 峰面积 %   |
|-----|------------|----|----------|-------------|----------|---------|
| 1   | 5.339      | VB | 0.1746   | 564.02307   | 48.87109 | 40.8290 |
| 2   | 7.108      | BB | 0.2340   | 817.40607   | 52.97548 | 59.1710 |

**Figure S-76.** HPLC Data of (*S*)-**4c** (from **3ab**) and racemic **4c**



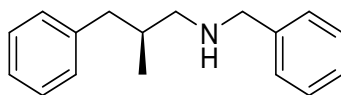

**4d**, 99% ee

<Chromatogram>

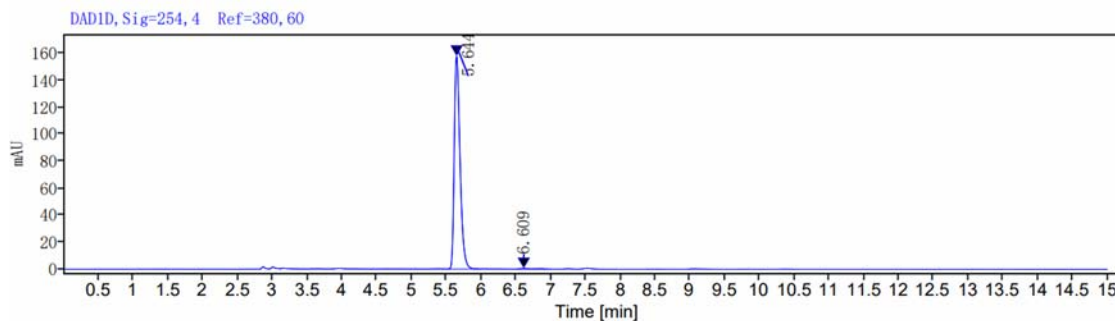

**Signal:** DAD1D, Sig=254, 4 Ref=380, 60

| RetTime [min] | Type | Width [min] | Area [mAU*s] | Height [mAU] | Area %  |
|---------------|------|-------------|--------------|--------------|---------|
| 5.644         | BV   | 0.43354     | 907.11244    | 158.12002    | 99.4396 |
| 6.609         | MM m | 0.46169     | 5.11218      | 0.52709      | 0.5604  |
| Totals        |      |             | 912.22463    |              |         |

<Chromatogram>

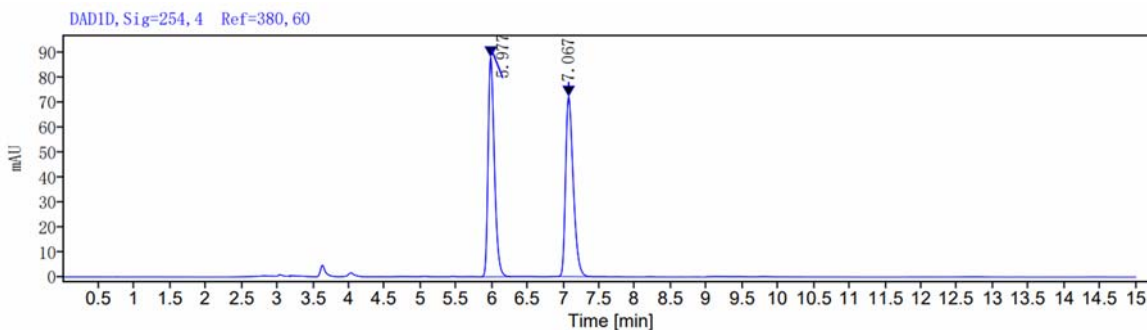

**Signal:** DAD1D, Sig=254, 4 Ref=380, 60

| RetTime [min] | Type | Width [min] | Area [mAU*s] | Height [mAU] | Area %  |
|---------------|------|-------------|--------------|--------------|---------|
| 5.977         | BV   | 0.40751     | 538.27319    | 87.95378     | 49.9991 |
| 7.067         | VV   | 0.43580     | 538.29245    | 72.07830     | 50.0009 |
| Totals        |      |             | 1076.56564   |              |         |

**Figure S-77.** HPLC Data of (S)-**4d** (from **3c**) and racemic **4d**

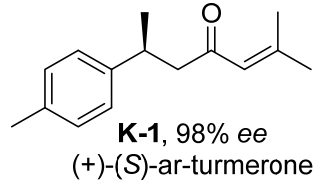

<Chromatogram>

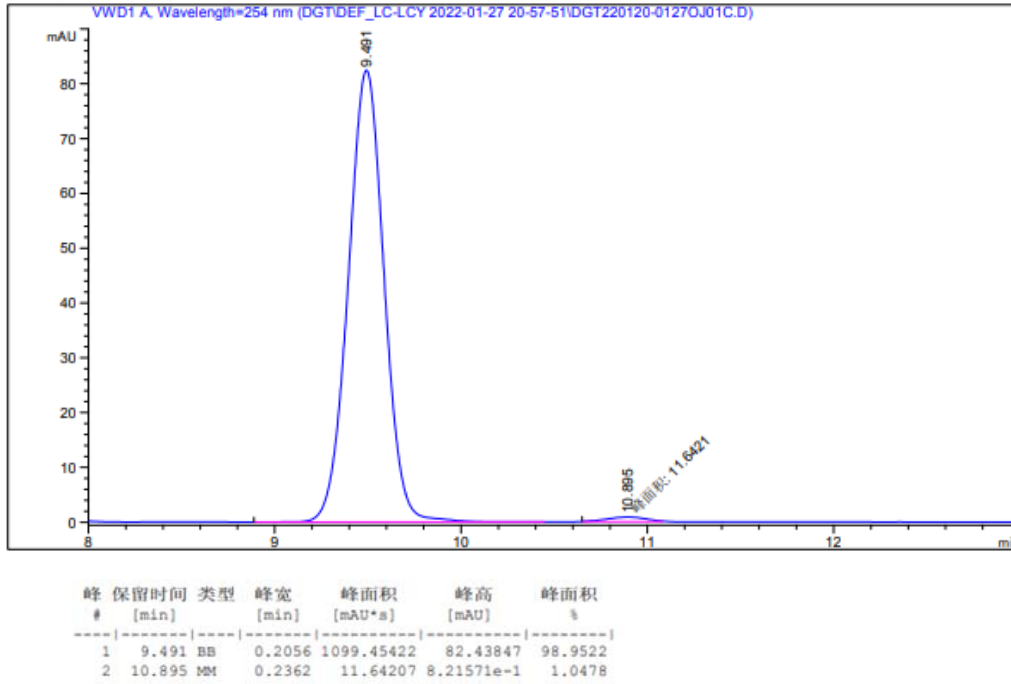

<Chromatogram>

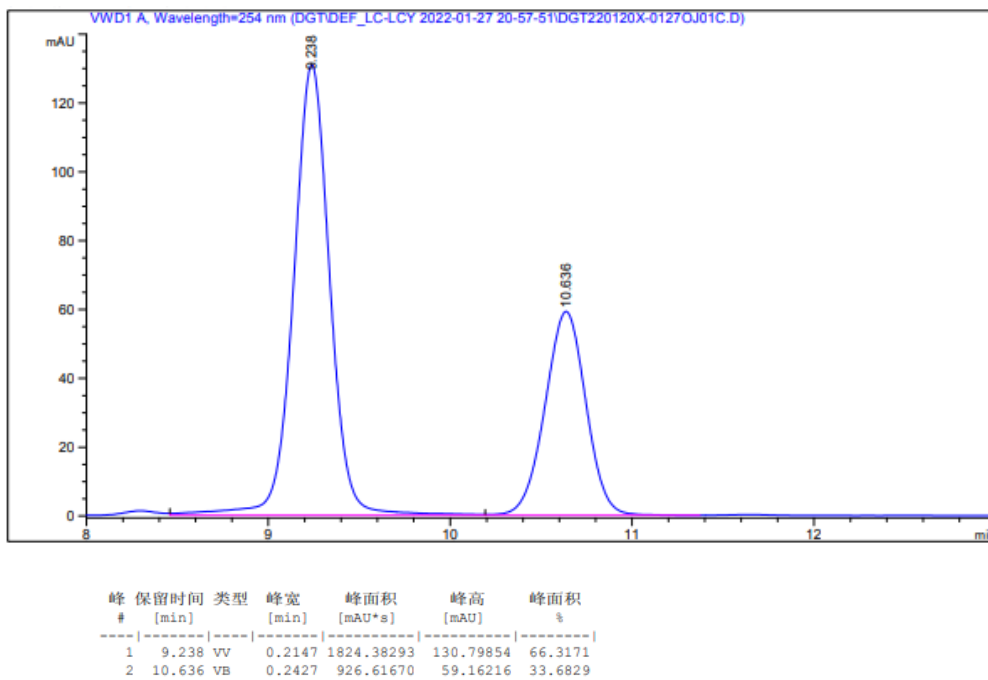

**Figure S-78.** HPLC Data of (+)-(S)-ar-turmerone (S)-K-1 (from **3y**) and racemic K-1

### X-Ray crystallography of 3c: CCC Deposition Number: 2162378

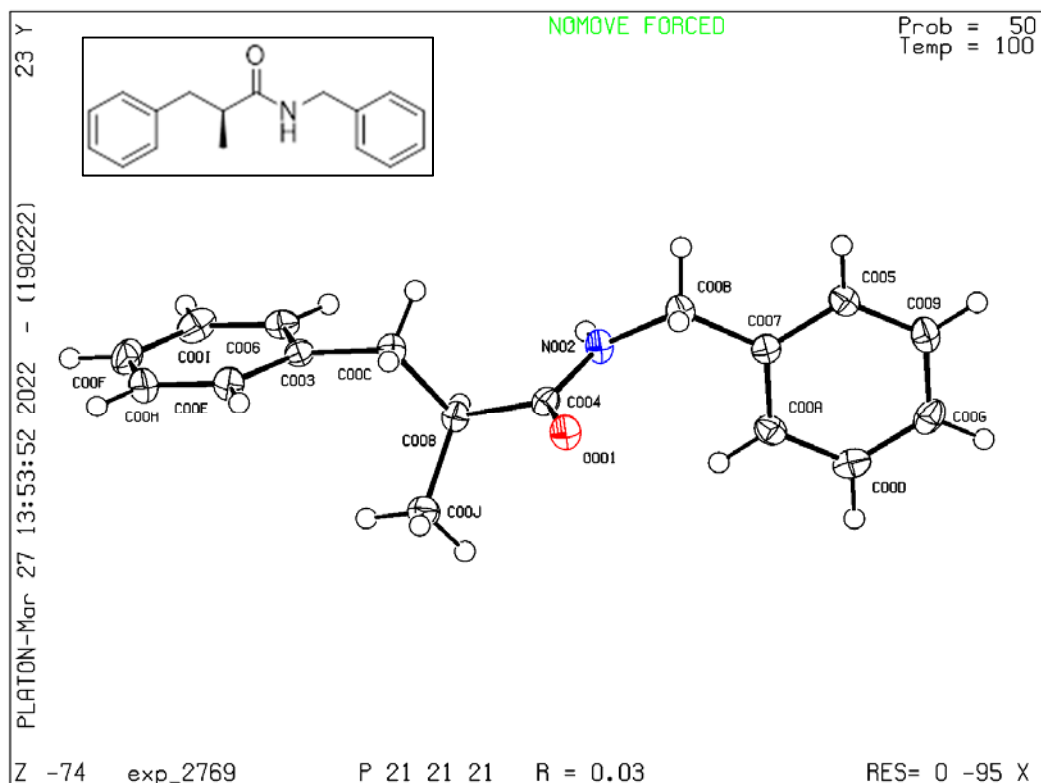

Single crystals of  $C_{17}H_{19}NO$  (**3c**) were recrystallized by vapor diffusion method (ethyl acetate and *n*-hexane) at 25 °C. A suitable crystal was selected and **mounted** on a **XtaLAB Synergy, Dualflex, HyPix** diffractometer. The crystal was kept at 99.99(10) K during data collection. Using Olex2<sup>[1]</sup>, the structure was solved with the SHELXT<sup>[2]</sup> structure solution program using Intrinsic Phasing and refined with the SHELXL<sup>[3]</sup> refinement package using Least Squares minimisation.

|                            |                  |
|----------------------------|------------------|
| <b>Identification code</b> | <b>exp_2769</b>  |
| <b>Empirical formula</b>   | $C_{17}H_{19}NO$ |
| <b>Formula weight</b>      | 253.33           |
| <b>Temperature/K</b>       | 99.99(10)        |
| <b>Crystal system</b>      | orthorhombic     |
| <b>Space group</b>         | $P2_12_12_1$     |
| <b>a/Å</b>                 | 9.74880(10)      |

|                                                   |                                                               |
|---------------------------------------------------|---------------------------------------------------------------|
| <b>b/Å</b>                                        | 9.78030(10)                                                   |
| <b>c/Å</b>                                        | 14.75820(10)                                                  |
| <b>α /°</b>                                       | 90                                                            |
| <b>β /°</b>                                       | 90                                                            |
| <b>γ /°</b>                                       | 90                                                            |
| <b>Volume/Å<sup>3</sup></b>                       | 1407.14(2)                                                    |
| <b>Z</b>                                          | 4                                                             |
| <b>ρ<sub>calc</sub>/cm<sup>3</sup></b>            | 1.196                                                         |
| <b>μ /mm<sup>-1</sup></b>                         | 0.574                                                         |
| <b>F(000)</b>                                     | 544.0                                                         |
| <b>Crystal size/mm<sup>3</sup></b>                | 0.2 × 0.2 × 0.2                                               |
| <b>Radiation</b>                                  | Cu Kα (λ = 1.54184)                                           |
| <b>2θ range for data collection/°</b>             | 10.852 to 148.558                                             |
| <b>Index ranges</b>                               | -12 ≤ h ≤ 11, -10 ≤ k ≤ 12, -17 ≤ l ≤ 18                      |
| <b>Reflections collected</b>                      | 14481                                                         |
| <b>Independent reflections</b>                    | 2818 [R <sub>int</sub> = 0.0332, R <sub>sigma</sub> = 0.0205] |
| <b>Data/restraints/parameters</b>                 | 2818/0/174                                                    |
| <b>Goodness-of-fit on F<sup>2</sup></b>           | 1.061                                                         |
| <b>Final R indexes [I &gt;= 2σ (I)]</b>           | R <sub>1</sub> = 0.0257, wR <sub>2</sub> = 0.0652             |
| <b>Final R indexes [all data]</b>                 | R <sub>1</sub> = 0.0259, wR <sub>2</sub> = 0.0654             |
| <b>Largest diff. peak/hole / e Å<sup>-3</sup></b> | 0.17/-0.14                                                    |
| <b>Flack parameter</b>                            | -0.08(9)                                                      |

**Table 1** Crystal data and structure refinement for **3c**

1. O. V. Dolomanov, L. J. Bourhis, R. J. Gildea, J. A. K. Howard and H. Puschmann, *J. Appl. Cryst.*, 2009, **42**, 339-341.
2. G. M. Sheldrick, *Acta Cryst.*, 2015, **A71**, 3-8.
3. G. M. Sheldrick, *Acta Cryst.*, 2015, **C71**, 3-8.
